# Supplementary material for: clrDV: a differential variability test for RNA-Seq data based on the skew-normal distribution
Source: PeerJ. 2023 Sep 29;11:e16126. doi: 10.7717/peerj.16126 (PMC10544356; doi:10.7717/peerj.16126)
Supplement: Supplemental Information 4 [file peerj-11-16126-s004.xlsx]

## Sheet: AD Union DV Genes BH
	gene_symbol	SD_ratio	adj_pval	indicator_clrDV	indicator_MDSeq	indicator_gamlss_BH
ENSG00000176165	FOXG1	0.275375	1.56632e-12	1	1	1
ENSG00000124249	KCNK15	0.364832	8.13953e-08	1	1	1
ENSG00000004848	ARX	0.374842	1.84541e-07	1	1	1
ENSG00000196110	ZNF699	0.388518	1.16939e-06	1	1	1
ENSG00000203618	GP1BB	0.394778	5.03458e-07	1	1	1
ENSG00000196639	HRH1	0.396934	3.63221e-06	1	1	1
ENSG00000255301	AP002893.1	0.403184	2.63979e-06	1	1	1
ENSG00000270689	BUD13P1	0.407207	1.33575e-06	1	1	1
ENSG00000011376	LARS2	0.408065	1.86363e-06	1	1	1
ENSG00000141456	PELP1	0.410449	6.82409e-07	1	1	1
ENSG00000279553	ENSG00000279553	0.411055	3.05897e-06	1	1	1
ENSG00000267890	AC010624.2	0.411537	1.33575e-06	1	1	1
ENSG00000237522	NONOP2	0.411845	3.02343e-06	1	1	1
ENSG00000253861	SLC2A3P1	0.418414	8.49829e-06	1	1	1
ENSG00000136141	LRCH1	0.419181	1.86363e-06	1	1	1
ENSG00000236668	AC006450.3	0.419446	4.0061e-06	1	1	1
ENSG00000261096	AC073476.3	0.42177	6.46767e-06	1	1	1
ENSG00000172349	IL16	0.421797	1.35197e-05	1	1	1
ENSG00000136925	TSTD2	0.423082	7.54988e-06	1	1	1
ENSG00000106689	LHX2	0.425017	5.57253e-06	1	1	1
ENSG00000140939	NOL3	0.426811	1.14328e-05	1	1	1
ENSG00000104969	SGTA	0.429466	1.6087e-05	1	1	1
ENSG00000114450	GNB4	0.430105	1.47326e-05	1	1	1
ENSG00000273217	AC008695.1	0.431365	1.08454e-05	1	1	1
ENSG00000276547	PCDHGB5	0.431998	1.90854e-05	1	1	1
ENSG00000204435	CSNK2B	0.434287	6.46767e-06	1	1	1
ENSG00000229152	ANKRD10-IT1	0.434505	7.58176e-06	1	1	1
ENSG00000132323	ILKAP	0.434632	1.0638e-05	1	1	1
ENSG00000130733	YIPF2	0.435018	1.17047e-05	1	1	1
ENSG00000169221	TBC1D10B	0.435719	1.40767e-05	1	1	1
ENSG00000267520	AC010733.2	0.437834	7.86151e-06	1	1	1
ENSG00000261934	PCDHGA9	0.438304	1.19392e-05	1	1	1
ENSG00000177600	RPLP2	0.44085	2.40299e-05	1	1	1
ENSG00000155287	SLC25A28	0.440949	1.14328e-05	1	1	1
ENSG00000076924	XAB2	0.441164	1.42211e-05	1	1	1
ENSG00000090054	SPTLC1	0.441525	1.08454e-05	1	1	1
ENSG00000135776	ABCB10	0.442724	6.46767e-06	1	1	1
ENSG00000181418	DDN	0.443848	8.49829e-06	1	1	1
ENSG00000089902	RCOR1	0.443855	3.63221e-06	1	1	1
ENSG00000106400	ZNHIT1	0.444468	4.36658e-05	1	1	1
ENSG00000071889	FAM3A	0.444969	4.81158e-05	1	1	1
ENSG00000153266	FEZF2	0.446892	1.14886e-05	1	1	1
ENSG00000171604	CXXC5	0.44714	6.27525e-05	1	1	1
ENSG00000214026	MRPL23	0.447201	1.40767e-05	1	1	1
ENSG00000280173	AC104447.1	0.448363	1.35197e-05	1	1	1
ENSG00000010244	ZNF207	0.449111	4.79661e-06	1	1	1
ENSG00000107036	RIC1	0.44962	8.49829e-06	1	1	1
ENSG00000176994	SMCR8	0.449673	3.26876e-05	1	1	1
ENSG00000130522	JUND	0.450152	1.9282e-05	1	1	1
ENSG00000169020	ATP5ME	0.451004	3.12211e-05	1	1	1
ENSG00000184209	SNRNP35	0.451346	3.44596e-05	1	1	1
ENSG00000069020	MAST4	0.45224	0.0110606	1	1	1
ENSG00000047849	MAP4	0.452342	1.96308e-05	1	1	1
ENSG00000269145	AC007192.2	0.452457	8.49829e-06	1	1	1
ENSG00000171222	SCAND1	0.452629	3.44596e-05	1	1	1
ENSG00000241111	PRICKLE2-AS1	0.452882	3.44596e-05	1	1	1
ENSG00000204524	ZNF805	0.453604	1.40767e-05	1	1	1
ENSG00000169692	AGPAT2	0.454731	7.58176e-06	1	1	1
ENSG00000134222	PSRC1	0.455115	1.08454e-05	1	1	1
ENSG00000172985	SH3RF3	0.455215	1.35197e-05	1	1	1
ENSG00000132849	PATJ	0.455221	1.60241e-05	1	1	1
ENSG00000175756	AURKAIP1	0.455482	1.9282e-05	1	1	1
ENSG00000178502	KLHL11	0.456639	4.81158e-05	1	1	1
ENSG00000182472	CAPN12	0.45676	7.65196e-05	1	1	1
ENSG00000186010	NDUFA13	0.456877	4.1802e-05	1	1	1
ENSG00000185070	FLRT2	0.457524	0.000303675	1	1	1
ENSG00000226439	AC108161.1	0.457668	7.98836e-06	1	1	1
ENSG00000150471	ADGRL3	0.457683	8.08621e-05	1	1	1
ENSG00000105258	POLR2I	0.457692	4.627e-05	1	1	1
ENSG00000165644	COMTD1	0.457819	1.14886e-05	1	1	1
ENSG00000071859	FAM50A	0.457823	4.18743e-05	1	1	1
ENSG00000260916	CCPG1	0.45799	4.39893e-05	1	1	1
ENSG00000142546	NOSIP	0.458487	8.49829e-06	1	1	1
ENSG00000266728	AC015688.5	0.458525	1.5616e-05	1	1	1
ENSG00000223343	AC137630.1	0.458627	3.70882e-05	1	1	1
ENSG00000130590	SAMD10	0.458642	1.14328e-05	1	1	1
ENSG00000069667	RORA	0.459395	3.58504e-05	1	1	1
ENSG00000242539	AC007620.2	0.459407	2.71725e-05	1	1	1
ENSG00000256973	AC053513.1	0.459549	6.27525e-05	1	1	1
ENSG00000010219	DYRK4	0.459997	3.26876e-05	1	1	1
ENSG00000185386	MAPK11	0.460892	1.14328e-05	1	1	1
ENSG00000034239	EFCAB1	0.460913	1.40767e-05	1	1	1
ENSG00000159899	NPR2	0.460953	8.73059e-06	1	1	1
ENSG00000160408	ST6GALNAC6	0.461306	1.22894e-05	1	1	1
ENSG00000164610	RP9	0.462043	5.6265e-05	1	1	1
ENSG00000160973	FOXH1	0.462135	1.26771e-05	1	1	1
ENSG00000079819	EPB41L2	0.462554	8.36822e-06	1	1	1
ENSG00000099624	ATP5F1D	0.462724	4.05304e-05	1	1	1
ENSG00000260500	AC010336.2	0.462782	1.77117e-05	1	1	1
ENSG00000160799	CCDC12	0.46316	3.25145e-05	1	1	1
ENSG00000033867	SLC4A7	0.463262	4.10964e-05	1	1	1
ENSG00000137135	ARHGEF39	0.463788	3.46037e-05	1	1	1
ENSG00000167178	ISLR2	0.464645	2.68292e-05	1	1	1
ENSG00000186960	LINC01551	0.464821	1.90854e-05	1	1	1
ENSG00000171159	C9orf16	0.464886	1.35197e-05	1	1	1
ENSG00000258677	AC022826.2	0.465239	4.43319e-05	1	1	1
ENSG00000179271	GADD45GIP1	0.465907	3.59738e-05	1	1	1
ENSG00000213462	ERV3-1	0.46625	4.36658e-05	1	1	1
ENSG00000130175	PRKCSH	0.466304	3.59738e-05	1	1	1
ENSG00000103942	HOMER2	0.466354	3.63206e-05	1	1	1
ENSG00000171365	CLCN5	0.467168	1.9282e-05	1	1	1
ENSG00000112706	IMPG1	0.467383	2.98006e-05	1	1	1
ENSG00000103363	ELOB	0.467603	3.48522e-05	1	1	1
ENSG00000204950	LRRC10B	0.467753	3.44596e-05	1	1	1
ENSG00000100142	POLR2F	0.467824	3.44596e-05	1	1	1
ENSG00000173113	TRMT112	0.468291	3.27115e-05	1	1	1
ENSG00000264044	AC005726.2	0.468414	4.18743e-05	1	1	1
ENSG00000008988	RPS20	0.468422	4.43319e-05	1	1	1
ENSG00000167257	RNF214	0.468429	4.18743e-05	1	1	1
ENSG00000168061	SAC3D1	0.468508	7.41143e-05	1	1	1
ENSG00000164828	SUN1	0.468955	1.90854e-05	1	1	1
ENSG00000124172	ATP5F1E	0.468983	3.26876e-05	1	1	1
ENSG00000265794	AC005899.4	0.468995	4.39257e-05	1	1	1
ENSG00000141699	RETREG3	0.469493	5.16112e-05	1	1	1
ENSG00000162924	REL	0.469647	5.29334e-05	1	1	1
ENSG00000273419	AC004877.1	0.470057	1.90854e-05	1	1	1
ENSG00000105642	KCNN1	0.470647	3.44596e-05	1	1	1
ENSG00000268565	AC005339.1	0.470798	2.40299e-05	1	1	1
ENSG00000117691	NENF	0.47108	5.88282e-05	1	1	1
ENSG00000160813	PPP1R35	0.471569	3.27115e-05	1	1	1
ENSG00000059915	PSD	0.472213	4.43319e-05	1	1	1
ENSG00000167526	RPL13	0.472836	6.52851e-05	1	1	1
ENSG00000166441	RPL27A	0.472913	6.48217e-05	1	1	1
ENSG00000203485	INF2	0.472948	1.14328e-05	1	1	1
ENSG00000197343	ZNF655	0.473378	2.32609e-05	1	1	1
ENSG00000186907	RTN4RL2	0.473519	4.39257e-05	1	1	1
ENSG00000112763	BTN2A1	0.473539	2.31646e-05	1	1	1
ENSG00000138771	SHROOM3	0.474014	1.4408e-05	1	1	1
ENSG00000241370	RPP21	0.474398	3.27115e-05	1	1	1
ENSG00000104897	SF3A2	0.474419	6.52851e-05	1	1	1
ENSG00000265784	AC006441.3	0.474457	3.27115e-05	1	1	1
ENSG00000214652	ZNF727	0.47462	4.18743e-05	1	1	1
ENSG00000168758	SEMA4C	0.474847	8.5261e-05	1	1	1
ENSG00000108107	RPL28	0.474882	7.12838e-05	1	1	1
ENSG00000130005	GAMT	0.474913	6.52851e-05	1	1	1
ENSG00000131069	ACSS2	0.474963	4.43319e-05	1	1	1
ENSG00000100564	PIGH	0.475483	4.36658e-05	1	1	1
ENSG00000183011	NAA38	0.475714	5.88685e-05	1	1	1
ENSG00000259948	AC124068.1	0.476032	4.17658e-05	1	1	1
ENSG00000065057	NTHL1	0.477037	3.00374e-05	1	1	1
ENSG00000002919	SNX11	0.477054	6.5183e-05	1	1	1
ENSG00000066032	CTNNA2	0.477275	4.75423e-05	1	1	1
ENSG00000076984	MAP2K7	0.477507	5.31676e-05	1	1	1
ENSG00000269935	AC092720.2	0.477776	4.53553e-05	1	1	1
ENSG00000120322	PCDHB8	0.477784	4.55075e-05	1	1	1
ENSG00000257704	INAFM1	0.477854	3.44596e-05	1	1	1
ENSG00000147408	CSGALNACT1	0.478134	5.20471e-05	1	1	1
ENSG00000164180	TMEM161B	0.478271	4.43319e-05	1	1	1
ENSG00000178531	CTXN1	0.478465	4.9981e-05	1	1	1
ENSG00000135441	BLOC1S1	0.478557	4.36658e-05	1	1	1
ENSG00000185236	RAB11B	0.478794	7.04361e-05	1	1	1
ENSG00000117281	CD160	0.478795	5.6265e-05	1	1	1
ENSG00000149806	FAU	0.478855	5.34405e-05	1	1	1
ENSG00000135953	MFSD9	0.479281	1.60241e-05	1	1	1
ENSG00000168273	SMIM4	0.479527	5.62868e-05	1	1	1
ENSG00000262049	AC139530.1	0.479777	0.000211904	1	1	1
ENSG00000123349	PFDN5	0.479956	7.25526e-05	1	1	1
ENSG00000118194	TNNT2	0.480003	5.34405e-05	1	1	1
ENSG00000262576	PCDHGA4	0.480161	5.29334e-05	1	1	1
ENSG00000129932	DOHH	0.480248	9.30085e-05	1	1	1
ENSG00000115232	ITGA4	0.480294	5.6265e-05	1	1	1
ENSG00000105202	FBL	0.48051	6.45805e-05	1	1	1
ENSG00000156502	SUPV3L1	0.480524	4.43319e-05	1	1	1
ENSG00000215039	CD27-AS1	0.48058	1.90854e-05	1	1	1
ENSG00000267796	LIN37	0.480777	7.12838e-05	1	1	1
ENSG00000278139	AL358075.4	0.480799	6.52851e-05	1	1	1
ENSG00000164898	FMC1	0.480866	6.5183e-05	1	1	1
ENSG00000229833	PET100	0.481062	5.22336e-05	1	1	1
ENSG00000186300	ZNF555	0.481213	3.20991e-05	1	1	1
ENSG00000015475	BID	0.481438	1.60761e-05	1	1	1
ENSG00000007520	TSR3	0.481537	0.000100606	1	1	1
ENSG00000272093	ENSG00000272093	0.481551	5.88282e-05	1	1	1
ENSG00000279322	AL035252.4	0.48217	1.87614e-05	1	1	1
ENSG00000204316	MRPL38	0.48226	7.25526e-05	1	1	1
ENSG00000095752	IL11	0.482597	3.38362e-05	1	1	1
ENSG00000136942	RPL35	0.482665	6.33818e-05	1	1	1
ENSG00000203950	RTL8A	0.482745	0.00028586	1	1	1
ENSG00000077044	DGKD	0.482792	7.24663e-05	1	1	1
ENSG00000150459	SAP18	0.482915	7.25526e-05	1	1	1
ENSG00000259330	INAFM2	0.482967	7.25526e-05	1	1	1
ENSG00000217930	PAM16	0.48299	0.000113342	1	1	1
ENSG00000079462	PAFAH1B3	0.483063	3.00374e-05	1	1	1
ENSG00000114391	RPL24	0.483208	8.30896e-05	1	1	1
ENSG00000105248	CCDC94	0.483355	8.5261e-05	1	1	1
ENSG00000174775	HRAS	0.483397	4.39257e-05	1	1	1
ENSG00000153395	LPCAT1	0.483919	4.46926e-05	1	1	1
ENSG00000130751	NPAS1	0.484034	4.43319e-05	1	1	1
ENSG00000168484	SFTPC	0.484085	8.5261e-05	1	1	1
ENSG00000160218	TRAPPC10	0.484093	3.36021e-05	1	1	1
ENSG00000105357	MYH14	0.484303	0.000419821	1	1	1
ENSG00000113615	SEC24A	0.484377	5.22336e-05	1	1	1
ENSG00000140563	MCTP2	0.484767	5.47091e-05	1	1	1
ENSG00000159335	PTMS	0.48483	5.88282e-05	1	1	1
ENSG00000169976	SF3B5	0.485013	6.27525e-05	1	1	1
ENSG00000044524	EPHA3	0.485024	9.1086e-05	1	1	1
ENSG00000258660	AC006146.1	0.485282	0.00413266	1	1	1
ENSG00000130511	SSBP4	0.485497	4.36658e-05	1	1	1
ENSG00000198585	NUDT16	0.485585	6.65206e-05	1	1	1
ENSG00000163040	CCDC74A	0.486254	4.81158e-05	1	1	1
ENSG00000176101	SSNA1	0.486516	8.45012e-05	1	1	1
ENSG00000060237	WNK1	0.486684	6.96859e-05	1	1	1
ENSG00000248672	LY75-CD302	0.486763	7.12838e-05	1	1	1
ENSG00000105404	RABAC1	0.487088	0.000173905	1	1	1
ENSG00000258283	AC011603.3	0.487132	6.24033e-05	1	1	1
ENSG00000105618	PRPF31	0.487145	7.71261e-05	1	1	1
ENSG00000136908	DPM2	0.487761	0.000223418	1	1	1
ENSG00000267009	AC007780.1	0.488098	7.9104e-05	1	1	1
ENSG00000144724	PTPRG	0.488211	0.000116585	1	1	1
ENSG00000077312	SNRPA	0.488216	7.74836e-05	1	1	1
ENSG00000142937	RPS8	0.488258	0.000133815	1	1	1
ENSG00000105705	SUGP1	0.488285	4.81158e-05	1	1	1
ENSG00000152583	SPARCL1	0.488305	7.01785e-05	1	0	1
ENSG00000178821	TMEM52	0.488545	5.95509e-05	1	1	1
ENSG00000104979	C19orf53	0.488645	7.25526e-05	1	1	1
ENSG00000188186	LAMTOR4	0.488871	4.18743e-05	1	1	1
ENSG00000162734	PEA15	0.48896	3.33142e-05	1	0	1
ENSG00000147041	SYTL5	0.48898	8.06686e-05	1	1	1
ENSG00000132017	DCAF15	0.489053	9.30085e-05	1	1	1
ENSG00000205544	TMEM256	0.489305	0.000155252	1	1	1
ENSG00000266469	AC005288.1	0.48958	7.24663e-05	1	1	1
ENSG00000260342	AC138811.2	0.489675	0.000125918	1	1	1
ENSG00000237440	ZNF737	0.489713	5.50151e-05	1	1	1
ENSG00000137825	ITPKA	0.489724	7.95271e-05	1	1	1
ENSG00000182575	NXPH3	0.490027	4.17882e-05	1	1	1
ENSG00000178773	CPNE7	0.490283	6.1026e-05	1	1	1
ENSG00000141542	RAB40B	0.490424	6.52851e-05	1	1	1
ENSG00000125995	ROMO1	0.490468	5.95509e-05	1	1	1
ENSG00000183077	AFMID	0.490571	0.000127594	1	1	1
ENSG00000261732	AL031708.1	0.490592	7.37674e-05	1	1	1
ENSG00000115268	RPS15	0.490833	0.000115595	1	1	1
ENSG00000198858	R3HDM4	0.49105	7.12219e-05	1	1	1
ENSG00000130818	ZNF426	0.491122	8.36443e-05	1	1	1
ENSG00000267396	AC090236.1	0.49147	6.7311e-05	1	1	1
ENSG00000109089	CDR2L	0.491531	0.00010332	1	1	1
ENSG00000165802	NSMF	0.491546	7.14061e-05	1	1	1
ENSG00000254429	AP001972.1	0.491723	4.94125e-05	1	1	1
ENSG00000227671	AL390728.4	0.491878	7.55289e-05	1	1	1
ENSG00000101190	TCFL5	0.491934	0.000107682	1	1	1
ENSG00000100387	RBX1	0.491938	0.000107821	1	1	1
ENSG00000145592	RPL37	0.492105	5.3329e-05	1	1	1
ENSG00000157368	IL34	0.492703	7.01392e-05	1	1	1
ENSG00000108298	RPL19	0.492788	0.000137395	1	1	1
ENSG00000103528	SYT17	0.492875	0.000115467	1	1	1
ENSG00000188906	LRRK2	0.49298	0.000177726	1	1	1
ENSG00000163463	KRTCAP2	0.493093	9.2988e-05	1	1	1
ENSG00000129951	PLPPR3	0.49321	8.5261e-05	1	1	1
ENSG00000218891	ZNF579	0.493742	9.27213e-05	1	1	1
ENSG00000128805	ARHGAP22	0.493857	0.000148006	1	1	1
ENSG00000168350	DEGS2	0.494021	9.35411e-05	1	1	1
ENSG00000135390	ATP5MC2	0.494333	0.000102079	1	1	1
ENSG00000231955	AC007383.3	0.494598	0.000120209	1	1	1
ENSG00000261353	ENSG00000261353	0.494708	5.1277e-05	1	1	1
ENSG00000107902	LHPP	0.494709	0.000108778	1	1	1
ENSG00000149541	B3GAT3	0.494928	0.000172366	1	1	1
ENSG00000063177	RPL18	0.495422	0.000111932	1	1	1
ENSG00000160392	C19orf47	0.495439	0.00027105	1	1	1
ENSG00000275740	AC091959.3	0.49547	0.000137952	1	1	1
ENSG00000225174	OSTM1-AS1	0.495513	0.000148006	1	1	1
ENSG00000136052	SLC41A2	0.495704	0.000158792	1	1	1
ENSG00000267007	AC012615.2	0.495938	4.17658e-05	1	1	1
ENSG00000173327	MAP3K11	0.495955	5.84111e-05	1	1	1
ENSG00000171532	NEUROD2	0.496086	6.42701e-05	1	1	1
ENSG00000075568	TMEM131	0.496396	6.86265e-05	1	1	1
ENSG00000137857	DUOX1	0.496489	0.000148006	1	1	1
ENSG00000268613	ENSG00000268613	0.496493	0.00018821	1	1	1
ENSG00000258924	AC002094.1	0.496514	0.000253755	1	1	1
ENSG00000115935	WIPF1	0.496777	5.22336e-05	1	1	1
ENSG00000225663	MCRIP1	0.497009	0.000103467	1	1	1
ENSG00000262814	MRPL12	0.497072	0.000122398	1	1	1
ENSG00000152270	PDE3B	0.497093	5.1277e-05	1	1	1
ENSG00000097096	SYDE2	0.497126	0.000153402	1	1	1
ENSG00000188038	NRN1L	0.497196	0.00032393	1	1	1
ENSG00000235426	AL133481.1	0.497273	0.000179102	1	1	1
ENSG00000161677	JOSD2	0.497277	0.00029209	1	1	1
ENSG00000160194	NDUFV3	0.497285	0.000151577	1	1	1
ENSG00000133250	ZNF414	0.497335	0.000136929	1	1	1
ENSG00000157870	FAM213B	0.497388	0.000166675	1	1	1
ENSG00000257379	AC023509.1	0.497743	8.0694e-05	1	1	1
ENSG00000100083	GGA1	0.497954	0.000133815	1	1	1
ENSG00000267561	AC093155.3	0.497986	0.000157515	1	1	1
ENSG00000175575	PAAF1	0.498007	0.000108778	1	1	1
ENSG00000257529	RPL36A-HNRNPH2	0.498029	0.000176726	1	1	1
ENSG00000175416	CLTB	0.498053	4.94125e-05	1	1	1
ENSG00000268230	AC012313.3	0.498093	0.000142455	1	1	1
ENSG00000160190	SLC37A1	0.498268	0.000109562	1	1	1
ENSG00000095906	NUBP2	0.498372	6.52851e-05	1	1	1
ENSG00000270181	BIVM-ERCC5	0.498551	0.000275727	1	1	1
ENSG00000128487	SPECC1	0.498616	8.40141e-05	1	1	1
ENSG00000144580	CNOT9	0.498808	0.000125925	1	1	1
ENSG00000254245	PCDHGA3	0.49902	0.000200248	1	1	1
ENSG00000023902	PLEKHO1	0.499153	5.27014e-05	1	1	1
ENSG00000251369	ZNF550	0.499308	4.53553e-05	1	1	1
ENSG00000272909	AL122035.2	0.49937	0.000126676	1	1	1
ENSG00000111300	NAA25	0.499684	4.75423e-05	1	1	1
ENSG00000086504	MRPL28	0.499872	0.000191706	1	1	1
ENSG00000269987	AC004542.2	0.499993	8.96163e-05	1	1	1
ENSG00000134597	RBMX2	0.500225	0.000116585	1	1	1
ENSG00000099804	CDC34	0.500254	5.6265e-05	1	1	1
ENSG00000129911	KLF16	0.500349	7.25526e-05	1	1	1
ENSG00000243449	C4orf48	0.500368	0.000200248	1	1	1
ENSG00000197410	DCHS2	0.500416	0.000195124	1	1	1
ENSG00000162073	PAQR4	0.500436	0.000122015	1	1	1
ENSG00000175806	MSRA	0.500899	6.4366e-05	1	1	1
ENSG00000060688	SNRNP40	0.50091	0.000151711	1	1	1
ENSG00000101938	CHRDL1	0.501069	0.000148953	1	1	1
ENSG00000009724	MASP2	0.501105	0.000109562	1	1	1
ENSG00000104529	EEF1D	0.501415	0.000160254	1	1	1
ENSG00000172889	EGFL7	0.50153	6.52851e-05	1	1	1
ENSG00000231632	ENSG00000231632	0.501645	0.000230672	1	1	1
ENSG00000124614	RPS10	0.501683	0.000115467	1	1	1
ENSG00000255498	AC068385.1	0.501831	0.000213827	1	1	1
ENSG00000125266	EFNB2	0.501889	0.000319542	1	1	1
ENSG00000170214	ADRA1B	0.502136	0.000118741	1	1	1
ENSG00000135625	EGR4	0.502235	7.04361e-05	1	1	1
ENSG00000275464	FP565260.1	0.502574	0.000106816	1	0	1
ENSG00000279042	AP005242.4	0.502934	0.000139259	1	1	1
ENSG00000132718	SYT11	0.50309	0.000251473	1	1	1
ENSG00000128563	PRKRIP1	0.50311	0.000160089	1	1	1
ENSG00000143924	EML4	0.503234	5.62868e-05	1	1	1
ENSG00000214262	ANKRD36BP1	0.503428	0.000116259	1	1	1
ENSG00000125970	RALY	0.503529	0.000265613	1	1	1
ENSG00000062598	ELMO2	0.503601	7.37674e-05	1	1	1
ENSG00000105376	ICAM5	0.503873	0.0001121	1	1	1
ENSG00000095951	HIVEP1	0.504248	0.000923929	1	1	1
ENSG00000123159	GIPC1	0.504287	0.000314134	1	1	1
ENSG00000245910	SNHG6	0.504309	0.000119792	1	1	1
ENSG00000083807	SLC27A5	0.504329	0.000116585	1	1	1
ENSG00000008441	NFIX	0.504336	0.000137395	1	1	1
ENSG00000124493	GRM4	0.504351	7.47997e-05	1	1	1
ENSG00000155980	KIF5A	0.504401	0.000223132	1	0	1
ENSG00000229344	MTCO2P12	0.504546	0.000141526	1	1	1
ENSG00000003756	RBM5	0.504564	7.04361e-05	1	1	1
ENSG00000183186	C2CD4C	0.504755	0.000115467	1	1	1
ENSG00000168135	KCNJ4	0.504848	0.000126919	1	1	1
ENSG00000198933	TBKBP1	0.504898	0.000127594	1	1	1
ENSG00000151834	GABRA2	0.504948	0.000148006	1	1	1
ENSG00000184281	TSSC4	0.505114	0.000328194	1	1	1
ENSG00000179097	HTR1F	0.505255	0.000159798	1	1	1
ENSG00000101442	ACTR5	0.505343	0.000125918	1	1	1
ENSG00000103496	STX4	0.505469	0.000231373	1	1	1
ENSG00000014164	ZC3H3	0.50561	0.000187848	1	1	1
ENSG00000255686	AC073864.1	0.506167	7.65196e-05	1	1	1
ENSG00000168734	PKIG	0.506465	0.0001304	1	1	1
ENSG00000037749	MFAP3	0.506588	0.000154617	1	1	1
ENSG00000132549	VPS13B	0.506681	9.78397e-05	1	1	1
ENSG00000127554	GFER	0.507053	0.000250922	1	1	1
ENSG00000119698	PPP4R4	0.507519	0.00027105	1	1	1
ENSG00000182809	CRIP2	0.507878	0.000108778	1	1	1
ENSG00000006712	PAF1	0.507938	0.000160243	1	1	1
ENSG00000166526	ZNF3	0.508084	0.000315509	1	1	1
ENSG00000127366	TAS2R5	0.508085	0.00014987	1	1	1
ENSG00000175764	TTLL11	0.508114	0.000230991	1	1	1
ENSG00000140526	ABHD2	0.508264	0.000203197	1	1	1
ENSG00000120049	KCNIP2	0.508408	0.000231373	1	1	1
ENSG00000089597	GANAB	0.508425	8.29445e-05	1	1	1
ENSG00000164056	SPRY1	0.508525	7.24663e-05	1	1	1
ENSG00000272084	AL137127.1	0.508633	0.000182174	1	1	1
ENSG00000143643	TTC13	0.508716	7.30036e-05	1	1	1
ENSG00000127564	PKMYT1	0.508825	0.000151577	1	1	1
ENSG00000095564	BTAF1	0.508848	6.4366e-05	1	1	1
ENSG00000254122	PCDHGB7	0.508899	0.000195807	1	1	1
ENSG00000182196	ARL6IP4	0.508928	0.000356023	1	1	1
ENSG00000238057	ZEB2-AS1	0.50915	0.000172243	1	1	1
ENSG00000179526	SHARPIN	0.509258	0.000184501	1	1	1
ENSG00000234965	SHISA8	0.509469	7.30036e-05	1	1	1
ENSG00000253953	PCDHGB4	0.50958	0.000147786	1	1	1
ENSG00000161999	JMJD8	0.509592	0.000153708	1	1	1
ENSG00000198804	MT-CO1	0.509688	0.000142455	1	0	1
ENSG00000253873	PCDHGA11	0.509755	0.000124153	1	1	1
ENSG00000258199	AC073896.4	0.509778	0.000122641	1	1	1
ENSG00000112333	NR2E1	0.509796	0.000153402	1	1	1
ENSG00000239389	PCDHA13	0.509802	0.000274169	1	1	1
ENSG00000115392	FANCL	0.509817	6.1026e-05	1	1	1
ENSG00000105372	RPS19	0.509932	0.000295252	1	1	1
ENSG00000130775	THEMIS2	0.5102	0.000118039	1	1	1
ENSG00000205531	NAP1L4	0.510427	0.000252663	1	1	1
ENSG00000234741	GAS5	0.510589	0.00190443	1	1	1
ENSG00000198746	GPATCH3	0.510684	0.000580566	1	1	1
ENSG00000233542	AL391845.2	0.510711	0.000102079	1	1	1
ENSG00000204536	CCHCR1	0.511	0.000275057	1	1	1
ENSG00000164484	TMEM200A	0.511108	0.000348998	1	1	1
ENSG00000224051	CPTP	0.511153	0.000107682	1	1	1
ENSG00000115306	SPTBN1	0.511245	0.000156468	1	0	1
ENSG00000127980	PEX1	0.511314	8.02956e-05	1	1	1
ENSG00000184602	SNN	0.511407	0.000762805	1	1	1
ENSG00000196557	CACNA1H	0.511423	0.000185355	1	1	1
ENSG00000276462	BX255923.2	0.511436	0.000202832	1	1	1
ENSG00000169727	GPS1	0.51162	0.000169915	1	1	1
ENSG00000269621	AL589765.7	0.511746	0.000170873	1	1	1
ENSG00000185219	ZNF445	0.511824	0.000122015	1	1	1
ENSG00000108604	SMARCD2	0.511845	0.00028901	1	1	1
ENSG00000174521	TTC9B	0.512056	0.000125925	1	1	1
ENSG00000116584	ARHGEF2	0.512166	0.000212786	1	1	1
ENSG00000169155	ZBTB43	0.51224	0.000206414	1	1	1
ENSG00000110080	ST3GAL4	0.512263	0.000292579	1	1	1
ENSG00000127585	FBXL16	0.512358	0.00014987	1	1	1
ENSG00000170906	NDUFA3	0.512405	0.000222462	1	1	1
ENSG00000150510	FAM124A	0.512524	0.000275057	1	1	1
ENSG00000164096	C4orf3	0.512551	0.000179583	1	1	1
ENSG00000177679	SRRM3	0.512652	0.000106598	1	1	1
ENSG00000175467	SART1	0.512687	0.000345684	1	1	1
ENSG00000090971	NAT14	0.512873	7.62407e-05	1	1	1
ENSG00000132563	REEP2	0.512923	0.000145397	1	1	1
ENSG00000162191	UBXN1	0.513101	0.000500736	1	1	1
ENSG00000071462	BUD23	0.513595	0.000315509	1	1	1
ENSG00000134851	TMEM165	0.513611	0.000391781	1	1	1
ENSG00000101412	E2F1	0.513701	7.62407e-05	1	1	1
ENSG00000144713	RPL32	0.513824	0.000244665	1	1	1
ENSG00000236015	AC011290.2	0.513852	0.000148828	1	1	1
ENSG00000260941	LINC00622	0.514081	0.000293101	1	1	1
ENSG00000176956	LY6H	0.514266	0.000176726	1	1	1
ENSG00000104679	R3HCC1	0.514308	0.000220131	1	1	1
ENSG00000115286	NDUFS7	0.514451	0.000371816	1	1	1
ENSG00000177556	ATOX1	0.514538	0.000303042	1	1	1
ENSG00000179085	DPM3	0.514556	0.000119731	1	1	1
ENSG00000170558	CDH2	0.514575	0.000180649	1	1	1
ENSG00000107816	LZTS2	0.514713	0.000308369	1	1	1
ENSG00000260196	AC124798.1	0.514716	0.000107682	1	1	1
ENSG00000133103	COG6	0.514807	0.0001683	1	1	1
ENSG00000266844	AC093330.1	0.514819	0.000353094	1	1	1
ENSG00000162244	RPL29	0.51483	0.000275057	1	1	1
ENSG00000169900	PYDC1	0.514889	0.000361805	1	1	1
ENSG00000174791	RIN1	0.514906	0.00010096	1	1	1
ENSG00000280079	AC011447.7	0.514992	0.000148666	1	1	1
ENSG00000142606	MMEL1	0.515193	0.000137395	1	1	1
ENSG00000101199	ARFGAP1	0.515224	0.000108778	1	1	1
ENSG00000188167	TMPPE	0.515281	0.000230597	1	1	1
ENSG00000008083	JARID2	0.515388	0.000194242	1	1	1
ENSG00000169718	DUS1L	0.515725	0.000221381	1	1	1
ENSG00000133316	WDR74	0.515833	0.000309984	1	1	1
ENSG00000101189	MRGBP	0.516063	0.000500881	1	1	1
ENSG00000135924	DNAJB2	0.516193	0.000266781	1	1	1
ENSG00000184470	TXNRD2	0.516236	0.000195124	1	1	1
ENSG00000257386	AC025257.1	0.516284	0.000292569	1	1	1
ENSG00000066322	ELOVL1	0.516367	0.00615823	1	1	1
ENSG00000167964	RAB26	0.516538	0.000141309	1	1	1
ENSG00000255408	PCDHA3	0.516651	0.000258004	1	1	1
ENSG00000142669	SH3BGRL3	0.516657	0.000107821	1	1	1
ENSG00000276023	DUSP14	0.516742	0.00014882	1	1	1
ENSG00000239857	GET4	0.516811	0.0010057	1	1	1
ENSG00000055118	KCNH2	0.516865	7.55289e-05	1	1	1
ENSG00000246283	AC090510.1	0.516939	0.000287229	1	1	1
ENSG00000137154	RPS6	0.517172	0.000319542	1	1	1
ENSG00000089916	GPATCH2L	0.51718	0.000109562	1	1	1
ENSG00000181104	F2R	0.51723	0.000158792	1	1	1
ENSG00000131469	RPL27	0.517241	0.000209924	1	1	1
ENSG00000128185	DGCR6L	0.517265	0.000205374	1	1	1
ENSG00000001461	NIPAL3	0.517304	0.000786221	1	1	1
ENSG00000160401	CFAP157	0.517381	0.000142524	1	1	1
ENSG00000185946	RNPC3	0.517398	0.000265209	1	1	1
ENSG00000266028	SRGAP2	0.51747	0.000170873	1	1	1
ENSG00000172379	ARNT2	0.517516	0.000514031	1	1	1
ENSG00000163156	SCNM1	0.517543	0.000254621	1	1	1
ENSG00000104957	CCDC130	0.517574	0.000349243	1	1	1
ENSG00000179295	PTPN11	0.51762	0.000230597	1	1	1
ENSG00000136848	DAB2IP	0.517703	9.94098e-05	1	1	1
ENSG00000204271	SPIN3	0.517749	0.000213926	1	1	1
ENSG00000169181	GSG1L	0.51803	0.000519134	1	1	1
ENSG00000159409	CELF3	0.518058	0.000220131	1	1	1
ENSG00000102030	NAA10	0.518197	0.000366743	1	1	1
ENSG00000160741	CRTC2	0.518206	0.000346371	1	1	1
ENSG00000169087	HSPBAP1	0.518256	0.000344443	1	1	1
ENSG00000204387	C6orf48	0.518322	0.000386272	1	1	1
ENSG00000273749	CYFIP1	0.51839	0.000109562	1	1	1
ENSG00000221983	UBA52	0.518522	0.00027105	1	1	1
ENSG00000261093	AC141586.3	0.518572	0.000264393	1	1	1
ENSG00000169554	ZEB2	0.518657	0.000221381	1	1	1
ENSG00000254835	RNF185-AS1	0.518676	0.000239922	1	1	1
ENSG00000110700	RPS13	0.51952	0.00036441	1	1	1
ENSG00000149273	RPS3	0.519564	0.000385294	1	1	1
ENSG00000149016	TUT1	0.519879	0.000347893	1	1	1
ENSG00000116205	TCEANC2	0.519897	0.000213195	1	1	1
ENSG00000204392	LSM2	0.52005	0.000293101	1	1	1
ENSG00000255114	AP003392.3	0.520129	0.000153917	1	1	1
ENSG00000066629	EML1	0.520256	0.000103526	1	1	1
ENSG00000125817	CENPB	0.520266	0.000142455	1	1	1
ENSG00000121410	A1BG	0.520353	0.000356992	1	1	1
ENSG00000136856	SLC2A8	0.520411	0.000311383	1	1	1
ENSG00000090097	PCBP4	0.520412	0.000317217	1	1	1
ENSG00000114999	TTL	0.520713	0.000159504	1	1	1
ENSG00000100647	SUSD6	0.520716	0.000195124	1	1	1
ENSG00000070882	OSBPL3	0.520756	0.000251219	1	1	1
ENSG00000074696	HACD3	0.520869	0.000231373	1	1	1
ENSG00000064313	TAF2	0.521021	0.000249311	1	1	1
ENSG00000253846	PCDHGA10	0.521028	0.000249311	1	1	1
ENSG00000079435	LIPE	0.521135	0.000489415	1	1	1
ENSG00000126254	RBM42	0.521142	0.000840324	1	1	1
ENSG00000213029	SPHAR	0.521196	0.000109496	1	1	1
ENSG00000280282	AC138430.2	0.521347	0.000223418	1	0	1
ENSG00000167196	FBXO22	0.521455	0.000134244	1	1	1
ENSG00000170296	GABARAP	0.521497	0.000340153	1	1	1
ENSG00000253645	AC108863.1	0.521581	0.000388266	1	1	1
ENSG00000177189	RPS6KA3	0.521607	0.000340153	1	1	1
ENSG00000181826	RELL1	0.521681	0.0001683	1	0	1
ENSG00000259172	AC023024.1	0.521721	0.000296842	1	1	1
ENSG00000149929	HIRIP3	0.521805	0.000307077	1	1	1
ENSG00000130165	ELOF1	0.521817	0.000380082	1	1	1
ENSG00000271380	AL451085.2	0.52184	0.000171462	1	1	1
ENSG00000258824	AL122035.1	0.521975	9.50223e-05	1	1	1
ENSG00000248527	MTATP6P1	0.522111	0.000130729	1	1	1
ENSG00000136938	ANP32B	0.522309	0.000223418	1	1	1
ENSG00000254929	AL591684.2	0.522331	0.000343714	1	1	1
ENSG00000145824	CXCL14	0.522356	0.000249686	1	1	1
ENSG00000170581	STAT2	0.522375	0.000319542	1	1	1
ENSG00000197024	ZNF398	0.522494	0.000107314	1	1	1
ENSG00000262209	PCDHGB3	0.522587	0.000492521	1	1	1
ENSG00000117335	CD46	0.52265	0.000204353	1	1	1
ENSG00000173581	CCDC106	0.522723	0.000125918	1	1	1
ENSG00000143156	NME7	0.522996	0.000344501	1	1	1
ENSG00000174871	CNIH2	0.52317	0.000277892	1	1	1
ENSG00000008256	CYTH3	0.523209	0.000275991	1	1	1
ENSG00000221995	TIAF1	0.523432	0.000360269	1	1	1
ENSG00000134874	DZIP1	0.523538	0.00047635	1	1	1
ENSG00000005108	THSD7A	0.523585	0.000284435	1	1	1
ENSG00000263986	AC087393.2	0.52393	0.000405873	1	1	1
ENSG00000130731	METTL26	0.524165	0.00027023	1	1	1
ENSG00000179364	PACS2	0.524183	0.000316615	1	1	1
ENSG00000148308	GTF3C5	0.524199	0.000589847	1	1	1
ENSG00000133056	PIK3C2B	0.524303	0.000388605	1	1	1
ENSG00000184007	PTP4A2	0.524374	0.000407764	1	1	1
ENSG00000150764	DIXDC1	0.524454	0.000493733	1	1	1
ENSG00000274810	NPHP3-ACAD11	0.524502	0.000179583	1	1	1
ENSG00000107829	FBXW4	0.524512	0.00046915	1	1	1
ENSG00000161647	MPP3	0.524705	0.000197476	1	1	1
ENSG00000178445	GLDC	0.524828	0.000337199	1	1	1
ENSG00000156860	FBRS	0.524835	0.000343281	1	1	1
ENSG00000181409	AATK	0.524953	0.000364418	1	1	1
ENSG00000167645	YIF1B	0.525089	0.000149783	1	1	1
ENSG00000162992	NEUROD1	0.525137	0.000175579	1	1	1
ENSG00000272398	CD24	0.525152	0.000258004	1	1	1
ENSG00000171813	PWWP2B	0.525217	0.000277892	1	1	1
ENSG00000259946	BX005019.1	0.525439	0.000326047	1	1	1
ENSG00000176978	DPP7	0.525498	0.000314971	1	1	1
ENSG00000205155	PSENEN	0.525499	0.000108778	1	1	1
ENSG00000257923	CUX1	0.525526	0.00027251	1	1	1
ENSG00000197756	RPL37A	0.525589	0.000348414	1	1	1
ENSG00000095303	PTGS1	0.525593	0.000128779	1	1	1
ENSG00000130821	SLC6A8	0.525615	0.000371256	1	1	1
ENSG00000101246	ARFRP1	0.525695	0.000567249	1	1	1
ENSG00000164597	COG5	0.525729	0.000360269	1	1	1
ENSG00000223459	TCAF1P1	0.525756	0.000320678	1	1	1
ENSG00000116667	C1orf21	0.525855	0.000748054	1	1	1
ENSG00000249971	AC104116.1	0.525911	0.000476705	1	1	1
ENSG00000170889	RPS9	0.525925	0.00036441	1	1	1
ENSG00000280158	ENSG00000280158	0.526373	0.000352222	1	1	1
ENSG00000159884	CCDC107	0.526374	0.000279442	1	1	1
ENSG00000198938	MT-CO3	0.526685	0.000293101	1	0	1
ENSG00000139211	AMIGO2	0.526826	0.000176726	1	1	1
ENSG00000233009	NALCN-AS1	0.526882	0.000341877	1	1	1
ENSG00000112306	RPS12	0.527073	0.000465389	1	1	1
ENSG00000142676	RPL11	0.527195	0.000552035	1	1	1
ENSG00000250366	TUNAR	0.527206	0.000386272	1	1	1
ENSG00000181467	RAP2B	0.527255	0.000307166	1	1	1
ENSG00000152092	ASTN1	0.527377	0.000268961	1	1	1
ENSG00000160087	UBE2J2	0.52763	0.00094206	1	1	1
ENSG00000148296	SURF6	0.527767	0.000350695	1	1	1
ENSG00000010438	PRSS3	0.527784	0.000326784	1	1	1
ENSG00000188368	PRR19	0.527825	0.000537823	1	1	1
ENSG00000135945	REV1	0.527889	0.000204353	1	1	1
ENSG00000168214	RBPJ	0.52792	0.000398627	1	1	1
ENSG00000196544	BORCS6	0.527961	0.000316392	1	1	1
ENSG00000179909	ZNF154	0.52804	0.000183067	1	1	1
ENSG00000105254	TBCB	0.52836	0.000656989	1	1	1
ENSG00000197993	KEL	0.528406	0.00041135	1	1	1
ENSG00000161016	RPL8	0.528457	0.00047635	1	1	1
ENSG00000167996	FTH1	0.528495	0.000258004	1	0	1
ENSG00000139364	TMEM132B	0.52851	0.000553014	1	1	1
ENSG00000105926	MPP6	0.528599	0.0005065	1	1	1
ENSG00000067840	PDZD4	0.528628	0.000756695	1	1	1
ENSG00000111605	CPSF6	0.528631	0.000359721	1	1	1
ENSG00000105583	WDR83OS	0.528741	0.000141733	1	1	1
ENSG00000130734	ATG4D	0.528779	0.00045366	1	1	1
ENSG00000165338	HECTD2	0.528793	0.000659138	1	1	1
ENSG00000259863	SH3RF3-AS1	0.528899	0.00023225	1	1	1
ENSG00000276007	AC079414.3	0.528923	0.000201823	1	1	1
ENSG00000174307	PHLDA3	0.529002	0.00045524	1	1	1
ENSG00000169964	TMEM42	0.529051	0.0013702	1	1	1
ENSG00000277692	AL121583.1	0.529074	0.000414595	1	1	1
ENSG00000263843	AC022211.2	0.529094	0.000135984	1	1	1
ENSG00000107223	EDF1	0.529189	0.000667899	1	1	1
ENSG00000276995	ENSG00000276995	0.52919	0.000821257	1	1	1
ENSG00000142534	RPS11	0.529209	0.000371256	1	1	1
ENSG00000110328	GALNT18	0.529302	0.000311383	1	1	1
ENSG00000141404	GNAL	0.529372	0.000706604	1	1	1
ENSG00000112183	RBM24	0.52939	0.000411854	1	1	1
ENSG00000124251	TP53TG5	0.529456	0.000456845	1	1	1
ENSG00000182774	RPS17	0.529544	0.000447509	1	1	1
ENSG00000089053	ANAPC5	0.529614	0.000456339	1	1	1
ENSG00000260018	AC040169.1	0.5297	0.000151577	1	1	1
ENSG00000212864	RNF208	0.529894	0.00017926	1	1	1
ENSG00000171943	SRGAP2C	0.530034	0.00027105	1	1	1
ENSG00000011105	TSPAN9	0.530149	0.00027105	1	1	1
ENSG00000110717	NDUFS8	0.530183	0.000468416	1	1	1
ENSG00000077463	SIRT6	0.530192	0.000514196	1	1	1
ENSG00000163071	SPATA18	0.530324	0.000360604	1	1	1
ENSG00000224043	CCNT2-AS1	0.530349	0.000192206	1	1	1
ENSG00000184378	ACTRT3	0.53037	0.000213914	1	1	1
ENSG00000138802	SEC24B	0.53039	0.00036206	1	1	1
ENSG00000153443	UBALD1	0.53042	0.000580566	1	1	1
ENSG00000108556	CHRNE	0.530507	0.000230991	1	1	1
ENSG00000170919	TPT1-AS1	0.530607	0.000595603	1	1	1
ENSG00000040487	PQLC2	0.530609	0.000313558	1	1	1
ENSG00000225526	MKRN2OS	0.530623	0.000183067	1	1	1
ENSG00000152556	PFKM	0.530774	0.000425427	1	1	1
ENSG00000165643	SOHLH1	0.530895	0.000305571	1	1	1
ENSG00000173227	SYT12	0.530943	0.000343291	1	1	1
ENSG00000160298	C21orf58	0.530988	0.000493733	1	1	1
ENSG00000251196	AC106760.1	0.53102	0.000761352	1	1	1
ENSG00000180660	MAB21L1	0.531141	0.00021618	1	1	1
ENSG00000010626	LRRC23	0.531269	0.000505509	1	1	1
ENSG00000180884	ZNF792	0.531287	0.000252519	1	1	1
ENSG00000174137	FAM53A	0.531381	0.000645949	1	1	1
ENSG00000177156	TALDO1	0.53143	0.000476272	1	1	1
ENSG00000215217	C5orf49	0.531436	0.000223418	1	1	1
ENSG00000166398	KIAA0355	0.531471	0.000573395	1	1	1
ENSG00000266872	AC015688.7	0.531484	0.000315509	1	1	1
ENSG00000118217	ATF6	0.531606	0.000360676	1	1	1
ENSG00000279519	AC007382.1	0.531675	0.000389656	1	1	1
ENSG00000114423	CBLB	0.531747	0.000334962	1	1	1
ENSG00000106346	USP42	0.53188	0.000213195	1	1	1
ENSG00000138326	RPS24	0.531896	0.000448401	1	1	1
ENSG00000187514	PTMA	0.531975	0.000674581	1	1	1
ENSG00000182087	TMEM259	0.532073	0.000530399	1	1	1
ENSG00000107954	NEURL1	0.532377	0.000347355	1	1	1
ENSG00000160781	PAQR6	0.532424	0.000395042	1	1	1
ENSG00000172301	COPRS	0.532426	0.000182912	1	1	1
ENSG00000198382	UVRAG	0.532454	0.000213827	1	1	1
ENSG00000073169	SELENOO	0.53263	0.000360269	1	1	1
ENSG00000271782	ENSG00000271782	0.532655	0.000222782	1	1	1
ENSG00000268069	AC004466.1	0.532655	0.000603265	1	1	1
ENSG00000076641	PAG1	0.532753	0.000222462	1	1	1
ENSG00000279232	AC008522.1	0.532837	0.00135355	1	1	1
ENSG00000269906	AL606834.1	0.532839	0.000537155	1	1	1
ENSG00000179399	GPC5	0.532847	0.00100523	1	1	1
ENSG00000168137	SETD5	0.532871	0.000213195	1	1	1
ENSG00000130255	RPL36	0.533099	0.000377957	1	1	1
ENSG00000123612	ACVR1C	0.533123	0.000230597	1	1	1
ENSG00000125170	DOK4	0.533151	0.000231909	1	1	1
ENSG00000260025	AC009414.2	0.533285	0.000234395	1	1	1
ENSG00000115042	FAHD2A	0.533301	0.00117243	1	1	1
ENSG00000118495	PLAGL1	0.533313	0.000258004	1	1	1
ENSG00000176485	PLA2G16	0.533359	0.000549918	1	1	1
ENSG00000183722	LHFPL6	0.53338	0.000212786	1	1	1
ENSG00000198883	PNMA5	0.533497	0.000627758	1	1	1
ENSG00000125846	ZNF133	0.533589	0.000411102	1	1	1
ENSG00000172461	FUT9	0.533628	0.000832509	1	1	1
ENSG00000186566	GPATCH8	0.533726	0.000255971	1	1	1
ENSG00000105983	LMBR1	0.533783	0.000519134	1	1	1
ENSG00000196470	SIAH1	0.533795	0.000469347	1	1	1
ENSG00000273420	AC008738.7	0.533881	0.000252519	1	1	1
ENSG00000184144	CNTN2	0.533902	0.00063974	1	1	1
ENSG00000076826	CAMSAP3	0.533924	0.000326506	1	1	1
ENSG00000103254	FAM173A	0.533979	0.000364418	1	1	1
ENSG00000111727	HCFC2	0.533982	0.000212786	1	1	1
ENSG00000172346	CSDC2	0.534146	0.000212631	1	1	1
ENSG00000189144	ZNF573	0.534186	0.000576237	1	1	1
ENSG00000170340	B3GNT2	0.534225	0.000361342	1	1	1
ENSG00000145494	NDUFS6	0.534636	0.00133877	1	1	1
ENSG00000139899	CBLN3	0.534637	0.000446367	1	1	1
ENSG00000024048	UBR2	0.534657	0.000170873	1	1	1
ENSG00000103145	HCFC1R1	0.534754	0.000419821	1	1	1
ENSG00000260878	AC104072.1	0.534821	0.000461484	1	1	1
ENSG00000197128	ZNF772	0.534862	0.00041938	1	1	1
ENSG00000226852	ENSG00000226852	0.534979	0.00113376	1	1	1
ENSG00000132612	VPS4A	0.534986	0.000613351	1	1	1
ENSG00000183291	SELENOF	0.535035	0.000311383	1	1	1
ENSG00000083845	RPS5	0.53508	0.000576955	1	1	1
ENSG00000025800	KPNA6	0.53508	0.000347355	1	1	1
ENSG00000124155	PIGT	0.535147	0.000182174	1	1	1
ENSG00000146360	GPR6	0.535193	0.000721437	1	1	1
ENSG00000135519	KCNH3	0.535286	0.000347355	1	1	1
ENSG00000169427	KCNK9	0.535397	0.000300635	1	1	1
ENSG00000280071	FP565260.6	0.535401	0.000428049	1	1	1
ENSG00000174574	AKIRIN1	0.535511	0.000256935	1	1	1
ENSG00000163872	YEATS2	0.535609	0.000275057	1	1	1
ENSG00000139624	CERS5	0.535832	0.000463823	1	1	1
ENSG00000033327	GAB2	0.535855	0.000505509	1	1	1
ENSG00000177707	NECTIN3	0.535874	0.000434245	1	1	1
ENSG00000253729	PRKDC	0.535899	0.00024481	1	1	1
ENSG00000155761	SPAG17	0.536006	0.000421421	1	1	1
ENSG00000157212	PAXIP1	0.536007	0.000364547	1	1	1
ENSG00000065600	TMEM206	0.536032	0.000458252	1	1	1
ENSG00000279500	AC108704.2	0.53609	0.000558835	1	1	1
ENSG00000183444	OR7E38P	0.53618	0.000249311	1	1	1
ENSG00000160917	CPSF4	0.536275	0.000326047	1	1	1
ENSG00000156482	RPL30	0.536451	0.000747527	1	1	1
ENSG00000131187	F12	0.536497	0.000505509	1	1	1
ENSG00000011478	QPCTL	0.536524	0.000256122	1	1	1
ENSG00000162747	FCGR3B	0.536554	0.000741353	1	0	1
ENSG00000122406	RPL5	0.536674	0.000416907	1	1	1
ENSG00000185127	C6orf120	0.536742	0.000511718	1	1	1
ENSG00000169180	XPO6	0.536762	0.000414595	1	1	1
ENSG00000214425	LRRC37A4P	0.536808	0.00036441	1	1	1
ENSG00000257550	AC023509.2	0.536817	0.000234395	1	1	1
ENSG00000114251	WNT5A	0.536856	0.000476705	1	1	1
ENSG00000100211	CBY1	0.536889	0.000700066	1	1	1
ENSG00000148291	SURF2	0.53692	0.000907573	1	1	1
ENSG00000099795	NDUFB7	0.53696	0.000756558	1	1	1
ENSG00000188486	H2AFX	0.537022	0.000465531	1	1	1
ENSG00000211459	MT-RNR1	0.537042	0.00108858	1	0	1
ENSG00000267466	AC021683.1	0.537074	0.000489415	1	1	1
ENSG00000130724	CHMP2A	0.537094	0.000479344	1	1	1
ENSG00000007264	MATK	0.537151	0.000371256	1	1	1
ENSG00000163788	SNRK	0.53723	0.000391732	1	1	1
ENSG00000149932	TMEM219	0.537271	0.00045366	1	1	1
ENSG00000145808	ADAMTS19	0.537296	0.00045366	1	1	1
ENSG00000083817	ZNF416	0.537363	0.000191706	1	1	1
ENSG00000241990	PRR34-AS1	0.537583	0.00165157	1	1	1
ENSG00000179520	SLC17A8	0.53764	0.000592598	1	1	1
ENSG00000277258	PCGF2	0.537641	0.000179583	1	1	1
ENSG00000104419	NDRG1	0.537702	0.000797846	1	1	1
ENSG00000145075	CCDC39	0.537719	0.00132229	1	1	1
ENSG00000035664	DAPK2	0.537727	0.000759696	1	1	1
ENSG00000183248	PRR36	0.537745	0.000617002	1	1	1
ENSG00000137818	RPLP1	0.537824	0.000715624	1	1	1
ENSG00000204044	SLC12A5-AS1	0.537953	0.000434716	1	1	1
ENSG00000259168	AC104002.3	0.537962	0.000539409	1	1	1
ENSG00000120594	PLXDC2	0.538002	0.000258004	1	1	1
ENSG00000198712	MT-CO2	0.538057	0.000764036	1	0	1
ENSG00000273637	AL139260.2	0.538094	0.000460163	1	1	1
ENSG00000125755	SYMPK	0.538161	0.000721841	1	1	1
ENSG00000099849	RASSF7	0.538178	0.000194456	1	1	1
ENSG00000275088	AC026469.1	0.538494	0.000257594	1	1	1
ENSG00000196814	MVB12B	0.538527	0.000454635	1	1	1
ENSG00000259661	AC068831.4	0.538538	0.0010022	1	1	1
ENSG00000131116	ZNF428	0.538592	0.000627064	1	1	1
ENSG00000170234	PWWP2A	0.53864	0.00103026	1	1	1
ENSG00000119559	C19orf25	0.538656	0.00114467	1	1	1
ENSG00000166145	SPINT1	0.538657	0.000275057	1	1	1
ENSG00000168096	ANKS3	0.538701	0.000573395	1	1	1
ENSG00000205542	TMSB4X	0.538757	0.000573395	1	1	1
ENSG00000159753	CARMIL2	0.538872	0.00047514	1	1	1
ENSG00000133401	PDZD2	0.539093	0.000454286	1	1	1
ENSG00000142949	PTPRF	0.539178	0.000364418	1	1	1
ENSG00000181085	MAPK15	0.539205	0.000223418	1	1	1
ENSG00000134899	ERCC5	0.539252	0.000410794	1	1	1
ENSG00000169136	ATF5	0.53935	0.000512484	1	1	1
ENSG00000180739	S1PR5	0.539422	0.000213195	1	1	1
ENSG00000138617	PARP16	0.539449	0.000360269	1	1	1
ENSG00000129933	MAU2	0.539479	0.00053007	1	1	1
ENSG00000278948	AL031587.5	0.539571	0.00108591	1	1	1
ENSG00000131831	RAI2	0.539674	0.000476705	1	1	1
ENSG00000273188	AL022328.3	0.539688	0.000277892	1	1	1
ENSG00000181690	PLAG1	0.539782	0.000250922	1	1	1
ENSG00000135702	CHST5	0.539831	0.000410794	1	1	1
ENSG00000236859	NIFK-AS1	0.539928	0.000613351	1	1	1
ENSG00000186714	CCDC73	0.539966	0.000343291	1	1	1
ENSG00000267448	AC010649.1	0.539979	0.000445422	1	1	1
ENSG00000129515	SNX6	0.540101	0.000571074	1	1	1
ENSG00000146963	LUC7L2	0.54011	0.000607319	1	1	1
ENSG00000118922	KLF12	0.540193	0.000882819	1	1	1
ENSG00000134825	TMEM258	0.540222	0.00209712	1	1	1
ENSG00000134419	RPS15A	0.54026	0.000715005	1	1	1
ENSG00000134086	VHL	0.540278	0.000448401	1	1	1
ENSG00000139508	SLC46A3	0.540289	0.000250922	1	1	1
ENSG00000102103	PQBP1	0.540332	0.000656989	1	1	1
ENSG00000260465	AC018557.1	0.540502	0.000608212	1	1	1
ENSG00000131408	NR1H2	0.540592	0.00041725	1	1	1
ENSG00000116809	ZBTB17	0.54062	0.000741781	1	1	1
ENSG00000196547	MAN2A2	0.54078	0.00041135	1	1	1
ENSG00000215472	RPL17-C18orf32	0.540851	0.000425427	1	1	1
ENSG00000205220	PSMB10	0.54088	0.000476705	1	1	1
ENSG00000108469	RECQL5	0.540922	0.000476705	1	1	1
ENSG00000279456	AL353763.1	0.540951	0.000519134	1	1	1
ENSG00000138207	RBP4	0.540965	0.000542533	1	1	1
ENSG00000169989	TIGD4	0.541022	0.000580566	1	1	1
ENSG00000142765	SYTL1	0.541125	0.000425691	1	1	1
ENSG00000135299	ANKRD6	0.541192	0.000704365	1	1	1
ENSG00000177479	ARIH2	0.54123	0.00100846	1	1	1
ENSG00000134686	PHC2	0.541237	0.000624425	1	1	1
ENSG00000139971	C14orf37	0.54131	0.00117243	1	1	1
ENSG00000256364	AC069234.2	0.541332	0.000549918	1	1	1
ENSG00000105640	RPL18A	0.541354	0.000859664	1	1	1
ENSG00000149923	PPP4C	0.541356	0.000602218	1	1	1
ENSG00000109971	HSPA8	0.541479	0.00122934	1	1	1
ENSG00000146066	HIGD2A	0.541551	0.000311299	1	1	1
ENSG00000236051	MYCBP2-AS1	0.541745	0.000230856	1	1	1
ENSG00000154146	NRGN	0.541746	0.000545149	1	1	1
ENSG00000256966	AL513165.2	0.541772	0.000515039	1	1	1
ENSG00000054967	RELT	0.541828	0.000649699	1	1	1
ENSG00000259357	AL590133.2	0.541876	0.00114218	1	1	1
ENSG00000160993	ALKBH4	0.541916	0.000380082	1	1	1
ENSG00000278765	AC004477.3	0.541957	0.00297467	1	1	1
ENSG00000158292	GPR153	0.541994	0.000391781	1	1	1
ENSG00000126822	PLEKHG3	0.54202	0.0010548	1	1	1
ENSG00000184897	H1FX	0.542249	0.000595603	1	1	1
ENSG00000116251	RPL22	0.542255	0.00060886	1	1	1
ENSG00000198874	TYW1	0.542298	0.00113	1	1	1
ENSG00000171357	LURAP1	0.54232	0.000833449	1	1	1
ENSG00000105967	TFEC	0.542432	0.000656989	1	1	1
ENSG00000182771	GRID1	0.542441	0.000346371	1	1	1
ENSG00000124177	CHD6	0.542545	0.000428049	1	1	1
ENSG00000178695	KCTD12	0.542583	0.000371256	1	1	1
ENSG00000198918	RPL39	0.542587	0.000917919	1	1	1
ENSG00000150667	FSIP1	0.542617	0.000770211	1	1	1
ENSG00000167657	DAPK3	0.542632	0.00122934	1	1	1
ENSG00000131653	TRAF7	0.542661	0.00027105	1	1	1
ENSG00000091831	ESR1	0.542697	0.000530399	1	1	1
ENSG00000174839	DENND6A	0.542698	0.000446367	1	1	1
ENSG00000170017	ALCAM	0.542731	0.000246802	1	1	1
ENSG00000143947	RPS27A	0.542765	0.000801414	1	1	1
ENSG00000197971	MBP	0.542797	0.000672055	1	0	1
ENSG00000204237	OXLD1	0.542911	0.00135355	1	1	1
ENSG00000159023	EPB41	0.542967	0.000525233	1	1	1
ENSG00000169249	ZRSR2	0.543067	0.000407796	1	1	1
ENSG00000278897	AC020951.1	0.543128	0.000501463	1	1	1
ENSG00000172428	COPS9	0.543194	0.000456845	1	1	1
ENSG00000198742	SMURF1	0.543212	0.000252519	1	1	1
ENSG00000216921	AC131097.2	0.543264	0.00078037	1	1	1
ENSG00000196187	TMEM63A	0.543298	0.00106219	1	1	1
ENSG00000214944	ARHGEF28	0.543438	0.00104167	1	1	1
ENSG00000269190	FBXO17	0.543565	0.000386272	1	1	1
ENSG00000106066	CPVL	0.543613	0.000364547	1	1	1
ENSG00000196730	DAPK1	0.543619	0.00286839	1	1	1
ENSG00000108669	CYTH1	0.543667	0.000753048	1	1	1
ENSG00000082014	SMARCD3	0.543692	0.000269521	1	1	1
ENSG00000261884	AC040162.1	0.543859	0.000412882	1	1	1
ENSG00000105193	RPS16	0.544044	0.000999309	1	1	1
ENSG00000204217	BMPR2	0.544052	0.00104389	1	1	1
ENSG00000272240	AC004908.1	0.544188	0.000594722	1	1	1
ENSG00000136819	C9orf78	0.544232	0.00243661	1	1	1
ENSG00000166166	TRMT61A	0.54424	0.000927206	1	1	1
ENSG00000163794	UCN	0.544288	0.00213561	1	1	1
ENSG00000131495	NDUFA2	0.544311	0.000876445	1	1	1
ENSG00000198835	GJC2	0.544442	0.00146681	1	1	1
ENSG00000100147	CCDC134	0.54449	0.000385294	1	1	1
ENSG00000269495	AC011483.2	0.544614	0.000416907	1	1	1
ENSG00000158966	CACHD1	0.544625	0.0003512	1	1	1
ENSG00000159140	SON	0.544648	0.000341877	1	1	1
ENSG00000167515	TRAPPC2L	0.544768	0.0009185	1	1	1
ENSG00000279331	RBM12B-AS1	0.544931	0.00047635	1	1	1
ENSG00000115808	STRN	0.544941	0.000616548	1	1	1
ENSG00000134775	FHOD3	0.545002	0.000613351	1	1	1
ENSG00000108639	SYNGR2	0.54501	0.00177686	1	1	1
ENSG00000226245	ZNF32-AS1	0.545052	0.000410794	1	1	1
ENSG00000149577	SIDT2	0.545078	0.000465389	1	1	1
ENSG00000134369	NAV1	0.545146	0.000237221	1	1	1
ENSG00000040608	RTN4R	0.545201	0.000624392	1	1	1
ENSG00000143862	ARL8A	0.545284	0.000815483	1	1	1
ENSG00000198574	SH2D1B	0.545307	0.000746675	1	0	1
ENSG00000103266	STUB1	0.545396	0.000317217	1	1	1
ENSG00000196535	MYO18A	0.545422	0.000754549	1	1	1
ENSG00000152082	MZT2B	0.545425	0.000319542	1	1	1
ENSG00000198225	FKBP1C	0.545432	0.000476272	1	1	1
ENSG00000172469	MANEA	0.545498	0.000448401	1	1	1
ENSG00000109475	RPL34	0.54553	0.00169266	1	1	1
ENSG00000118094	TREH	0.54554	0.00080575	1	1	1
ENSG00000188215	DCUN1D3	0.545564	0.000700066	1	1	1
ENSG00000253305	PCDHGB6	0.545565	0.000553014	1	1	1
ENSG00000169499	PLEKHA2	0.545595	0.000714519	1	1	1
ENSG00000076321	KLHL20	0.54561	0.000380082	1	1	1
ENSG00000163888	CAMK2N2	0.54576	0.000619387	1	1	1
ENSG00000166949	SMAD3	0.545781	0.000753965	1	1	1
ENSG00000052126	PLEKHA5	0.545789	0.000566076	1	1	1
ENSG00000280143	AP000892.3	0.545816	0.000564563	1	1	1
ENSG00000135486	HNRNPA1	0.545834	0.000687833	1	1	1
ENSG00000133519	ZDHHC8P1	0.545843	0.000353111	1	1	1
ENSG00000198879	SFMBT2	0.545859	0.00027251	1	1	1
ENSG00000228989	ENSG00000228989	0.545933	0.000622055	1	1	1
ENSG00000074071	MRPS34	0.545979	0.00139349	1	1	1
ENSG00000121104	FAM117A	0.546116	0.000326506	1	1	1
ENSG00000108523	RNF167	0.546409	0.000383603	1	1	1
ENSG00000129534	MIS18BP1	0.546437	0.000533111	1	1	1
ENSG00000159459	UBR1	0.54651	0.000576641	1	1	1
ENSG00000100263	RHBDD3	0.546735	0.000832509	1	1	1
ENSG00000145817	YIPF5	0.546802	0.000503359	1	1	1
ENSG00000002330	BAD	0.546835	0.000552035	1	1	1
ENSG00000117602	RCAN3	0.546836	0.000783991	1	1	1
ENSG00000123144	TRIR	0.546877	0.000764947	1	1	1
ENSG00000075914	EXOSC7	0.547127	0.00139122	1	1	1
ENSG00000259607	AC108449.3	0.547157	0.00102644	1	1	1
ENSG00000101470	TNNC2	0.547197	0.000448401	1	1	1
ENSG00000183111	ARHGEF37	0.547354	0.00124587	1	1	1
ENSG00000105851	PIK3CG	0.547368	0.00122853	1	1	1
ENSG00000154655	L3MBTL4	0.547456	0.000382744	1	1	1
ENSG00000185551	NR2F2	0.547519	0.00121733	1	1	1
ENSG00000142541	RPL13A	0.54757	0.000850573	1	1	1
ENSG00000134072	CAMK1	0.547572	0.00104167	1	1	1
ENSG00000230445	LRRC37A6P	0.547852	0.000741781	1	1	1
ENSG00000100410	PHF5A	0.547944	0.000498509	1	1	1
ENSG00000198205	ZXDA	0.547957	0.00060886	1	1	1
ENSG00000140988	RPS2	0.548011	0.000942558	1	1	1
ENSG00000083814	ZNF671	0.548058	0.000507097	1	1	1
ENSG00000244274	DBNDD2	0.548074	0.000617002	1	1	1
ENSG00000091490	SEL1L3	0.548207	0.00029652	1	1	1
ENSG00000124374	PAIP2B	0.548339	0.00115217	1	1	1
ENSG00000161681	SHANK1	0.548392	0.000722904	1	1	1
ENSG00000162670	BRINP3	0.548523	0.000821246	1	1	1
ENSG00000135638	EMX1	0.548699	0.000595603	1	1	1
ENSG00000147403	RPL10	0.54891	0.00149372	1	1	1
ENSG00000146414	SHPRH	0.548924	0.00030005	1	1	1
ENSG00000185133	INPP5J	0.548937	0.000418059	1	1	1
ENSG00000228492	RAB11FIP1P1	0.54897	0.000613351	1	1	1
ENSG00000155265	GOLGA7B	0.548991	0.000407796	1	1	1
ENSG00000174915	PTDSS2	0.548992	0.00107335	1	1	1
ENSG00000197785	ATAD3A	0.549044	0.000757811	1	1	1
ENSG00000168748	CA7	0.549064	0.00060886	1	1	1
ENSG00000269711	AC008763.3	0.549069	0.000463607	1	1	1
ENSG00000070808	CAMK2A	0.549116	0.000641128	1	1	1
ENSG00000189420	ZFP92	0.549167	0.00127258	1	1	1
ENSG00000103966	EHD4	0.549172	0.000741781	1	1	1
ENSG00000159692	CTBP1	0.549172	0.00107262	1	1	1
ENSG00000232630	PRPS1P2	0.549313	0.000882111	1	0	1
ENSG00000116863	ADPRHL2	0.549318	0.000582643	1	1	1
ENSG00000116652	DLEU2L	0.54933	0.00161161	1	1	1
ENSG00000179902	C1orf194	0.549342	0.000351672	1	1	1
ENSG00000107957	SH3PXD2A	0.549358	0.000738233	1	1	1
ENSG00000128578	STRIP2	0.549416	0.000921283	1	1	1
ENSG00000164081	TEX264	0.549455	0.000922407	1	1	1
ENSG00000116544	DLGAP3	0.549558	0.000549918	1	1	1
ENSG00000159210	SNF8	0.549588	0.00127303	1	1	1
ENSG00000266338	NBPF15	0.549742	0.000501245	1	1	1
ENSG00000279970	AC023024.2	0.549835	0.00157847	1	1	1
ENSG00000186577	SMIM29	0.549912	0.000538504	1	1	1
ENSG00000173338	KCNK7	0.549917	0.00137332	1	1	1
ENSG00000116747	TROVE2	0.549926	0.000381212	1	1	1
ENSG00000101213	PTK6	0.549933	0.00111784	1	1	1
ENSG00000198763	MT-ND2	0.550005	0.00223516	1	0	1
ENSG00000112624	BICRAL	0.550042	0.00041135	1	1	1
ENSG00000272821	U62317.3	0.550079	0.00104457	1	1	1
ENSG00000187239	FNBP1	0.550089	0.000753387	1	1	1
ENSG00000109046	WSB1	0.550106	0.000351672	1	1	1
ENSG00000003393	ALS2	0.550114	0.000770038	1	1	1
ENSG00000279668	AC024610.2	0.550115	0.000411854	1	1	1
ENSG00000105767	CADM4	0.550235	0.00729465	1	1	1
ENSG00000263001	GTF2I	0.550241	0.00108271	1	1	1
ENSG00000165521	EML5	0.550245	0.000435587	1	1	1
ENSG00000182870	GALNT9	0.550266	0.000645949	1	1	1
ENSG00000141569	TRIM65	0.550357	0.000932688	1	1	1
ENSG00000232940	HCG25	0.550385	0.000706604	1	1	1
ENSG00000129757	CDKN1C	0.550399	0.00090944	1	1	1
ENSG00000145431	PDGFC	0.550418	0.000343291	1	1	1
ENSG00000238276	AL354863.1	0.550429	0.00125756	1	1	1
ENSG00000070501	POLB	0.550448	0.000616548	1	1	1
ENSG00000251660	AC007036.3	0.55049	0.000989826	1	1	1
ENSG00000212670	ENSG00000212670	0.550526	0.00094206	1	1	1
ENSG00000166596	CFAP52	0.550532	0.000786105	1	1	1
ENSG00000185129	PURA	0.55055	0.000358917	1	1	1
ENSG00000083896	YTHDC1	0.550846	0.000542533	1	1	1
ENSG00000248540	AC010931.2	0.550901	0.0016944	1	0	1
ENSG00000180354	MTURN	0.551008	0.000651554	1	1	1
ENSG00000266820	KPNA2P3	0.551271	0.000553472	1	1	1
ENSG00000151498	ACAD8	0.551315	0.000465531	1	1	1
ENSG00000102387	TAF7L	0.551365	0.000840468	1	1	1
ENSG00000160961	ZNF333	0.551425	0.00141434	1	1	1
ENSG00000129993	CBFA2T3	0.551495	0.00036441	1	1	1
ENSG00000181350	LRRC75A	0.551533	0.000335735	1	1	1
ENSG00000177105	RHOG	0.551554	0.00133877	1	1	1
ENSG00000078804	TP53INP2	0.551629	0.000927206	1	1	1
ENSG00000259164	AC007375.2	0.551677	0.00120268	1	1	1
ENSG00000197714	ZNF460	0.551722	0.000456339	1	1	1
ENSG00000254198	AC113191.1	0.55176	0.000882819	1	1	1
ENSG00000164112	TMEM155	0.5518	0.000882819	1	0	1
ENSG00000245937	LINC01184	0.551806	0.000842187	1	1	1
ENSG00000136274	NACAD	0.551892	0.000804665	1	1	1
ENSG00000269908	ENSG00000269908	0.551937	0.000500881	1	1	1
ENSG00000109956	B3GAT1	0.551982	0.000424038	1	1	1
ENSG00000179796	LRRC3B	0.552026	0.000348414	1	1	1
ENSG00000139438	FAM222A	0.552044	0.000821246	1	1	1
ENSG00000223891	OSER1-AS1	0.552063	0.000680133	1	1	1
ENSG00000086200	IPO11	0.55214	0.000683181	1	1	1
ENSG00000168702	LRP1B	0.552157	0.00208602	1	1	1
ENSG00000163870	TPRA1	0.552338	0.000942558	1	1	1
ENSG00000120942	UBIAD1	0.552487	0.000395042	1	1	1
ENSG00000112561	TFEB	0.552555	0.00137195	1	1	1
ENSG00000173542	MOB1B	0.55259	0.000411854	1	1	1
ENSG00000270898	GPR75-ASB3	0.552753	0.00159185	1	1	1
ENSG00000272921	AC005832.4	0.552798	0.000978956	1	1	1
ENSG00000099250	NRP1	0.552892	0.000668684	1	1	1
ENSG00000126756	UXT	0.552892	0.00157991	1	1	1
ENSG00000177463	NR2C2	0.552896	0.000371816	1	1	1
ENSG00000134533	RERG	0.552923	0.000637146	1	1	1
ENSG00000279689	AC022400.8	0.55294	0.00124587	1	1	1
ENSG00000043591	ADRB1	0.552974	0.000927655	1	1	1
ENSG00000236528	AL033528.2	0.55309	0.0010693	1	0	1
ENSG00000162706	CADM3	0.553097	0.00104457	1	1	1
ENSG00000234390	USP27X-AS1	0.553167	0.00104389	1	1	1
ENSG00000278811	LINC00624	0.553186	0.000722238	1	1	1
ENSG00000158552	ZFAND2B	0.553204	0.000710145	1	1	1
ENSG00000139292	LGR5	0.55328	0.00105599	1	1	1
ENSG00000235118	FAM237A	0.553334	0.00118561	1	0	1
ENSG00000224870	AL391244.1	0.553417	0.00336249	1	1	1
ENSG00000233621	LINC01137	0.553567	0.000358917	1	1	1
ENSG00000004455	AK2	0.553594	0.00125931	1	1	1
ENSG00000019549	SNAI2	0.553618	0.000622055	1	1	1
ENSG00000278722	AL445288.1	0.553769	0.00094206	1	1	1
ENSG00000136305	CIDEB	0.553864	0.000627394	1	1	1
ENSG00000125966	MMP24	0.553868	0.00047635	1	1	1
ENSG00000203778	FAM229B	0.553903	0.00100293	1	1	1
ENSG00000106948	AKNA	0.553914	0.000500881	1	1	1
ENSG00000185164	NOMO2	0.554047	0.000741781	1	1	1
ENSG00000198108	CHSY3	0.554056	0.00118503	1	1	1
ENSG00000049130	KITLG	0.554062	0.00124816	1	1	1
ENSG00000136381	IREB2	0.554065	0.000786221	1	1	1
ENSG00000213523	SRA1	0.554106	0.00133354	1	1	1
ENSG00000041988	THAP3	0.554116	0.00126853	1	1	1
ENSG00000266642	AC024267.6	0.554121	0.000840324	1	1	1
ENSG00000050767	COL23A1	0.554153	0.000832509	1	1	1
ENSG00000267436	AC005786.3	0.554184	0.00113	1	1	1
ENSG00000103365	GGA2	0.554256	0.000656989	1	1	1
ENSG00000174444	RPL4	0.554338	0.000680133	1	1	1
ENSG00000007080	CCDC124	0.554383	0.0015662	1	1	1
ENSG00000127831	VIL1	0.554409	0.00078037	1	1	1
ENSG00000256206	AC018523.2	0.55449	0.00144257	1	1	1
ENSG00000105327	BBC3	0.554498	0.000378561	1	1	1
ENSG00000248441	LINC01197	0.554599	0.00105135	1	1	1
ENSG00000090686	USP48	0.554626	0.00119371	1	1	1
ENSG00000186642	PDE2A	0.554641	0.00108858	1	1	1
ENSG00000163082	SGPP2	0.554667	0.00106089	1	1	1
ENSG00000130811	EIF3G	0.554689	0.00183958	1	1	1
ENSG00000172345	STARD5	0.554704	0.000832509	1	1	1
ENSG00000103024	NME3	0.554779	0.00122541	1	1	1
ENSG00000185347	TEDC1	0.554829	0.00115056	1	1	1
ENSG00000204172	AGAP9	0.554899	0.00121491	1	1	1
ENSG00000108654	DDX5	0.554911	0.000504962	1	1	1
ENSG00000279592	AC010653.2	0.554933	0.000700326	1	1	1
ENSG00000248333	CDK11B	0.554996	0.00127303	1	1	1
ENSG00000178028	DMAP1	0.55501	0.00100633	1	1	1
ENSG00000272772	AC104109.3	0.555039	0.00337338	1	1	1
ENSG00000174951	FUT1	0.555043	0.000895852	1	1	1
ENSG00000108231	LGI1	0.555119	0.000756558	1	1	1
ENSG00000262967	AC005921.2	0.55517	0.00101195	1	1	1
ENSG00000117036	ETV3	0.555205	0.000815223	1	1	1
ENSG00000266412	NCOA4	0.5553	0.000707017	1	1	1
ENSG00000174740	PABPC5	0.555334	0.00036441	1	1	1
ENSG00000119321	FKBP15	0.555359	0.0014713	1	1	1
ENSG00000105617	LENG1	0.555367	0.000821246	1	1	1
ENSG00000104907	TRMT1	0.555397	0.00109878	1	1	1
ENSG00000149798	CDC42EP2	0.555406	0.000951479	1	1	1
ENSG00000123384	LRP1	0.555431	0.000656989	1	1	1
ENSG00000115760	BIRC6	0.555434	0.000410794	1	1	1
ENSG00000214140	PRCD	0.555457	0.00140614	1	1	1
ENSG00000129968	ABHD17A	0.555465	0.000756558	1	1	1
ENSG00000253854	AC010834.3	0.555591	0.00114068	1	1	1
ENSG00000157193	LRP8	0.555706	0.00125257	1	1	1
ENSG00000168917	SLC35G2	0.555751	0.00119452	1	1	1
ENSG00000103269	RHBDL1	0.555862	0.000553489	1	1	1
ENSG00000185813	PCYT2	0.555868	0.0037218	1	1	1
ENSG00000123353	ORMDL2	0.555899	0.000553345	1	1	1
ENSG00000185298	CCDC137	0.556008	0.0015605	1	1	1
ENSG00000141298	SSH2	0.556015	0.000998125	1	1	1
ENSG00000261553	AL137782.1	0.556061	0.000695308	1	1	1
ENSG00000184436	THAP7	0.556119	0.00164626	1	1	1
ENSG00000185100	ADSSL1	0.55622	0.00095276	1	1	1
ENSG00000213465	ARL2	0.556324	0.00131341	1	1	1
ENSG00000198369	SPRED2	0.556389	0.00126805	1	1	1
ENSG00000179456	ZBTB18	0.556451	0.000388266	1	1	1
ENSG00000168646	AXIN2	0.556563	0.00112649	1	1	1
ENSG00000140264	SERF2	0.556574	0.00159017	1	1	1
ENSG00000101333	PLCB4	0.556575	0.000576641	1	1	1
ENSG00000213199	ASIC3	0.55661	0.0014713	1	1	1
ENSG00000162585	FAAP20	0.556615	0.000839146	1	1	1
ENSG00000153823	PID1	0.556615	0.000418059	1	1	1
ENSG00000081041	CXCL2	0.556629	0.00060886	1	1	1
ENSG00000197702	PARVA	0.55669	0.00106708	1	1	1
ENSG00000090238	YPEL3	0.556704	0.0015662	1	1	1
ENSG00000005884	ITGA3	0.556716	0.000620457	1	1	1
ENSG00000179292	TMEM151A	0.556806	0.00036441	1	1	1
ENSG00000260482	AC008870.1	0.55682	0.00046752	1	1	1
ENSG00000125912	NCLN	0.55684	0.00167133	1	1	1
ENSG00000164128	NPY1R	0.55684	0.00125451	1	1	1
ENSG00000261236	BOP1	0.55684	0.000608212	1	1	1
ENSG00000053372	MRTO4	0.55687	0.000832509	1	1	1
ENSG00000197180	AC244090.1	0.556886	0.000698395	1	1	1
ENSG00000107338	SHB	0.556896	0.000515039	1	1	1
ENSG00000179403	VWA1	0.556915	0.0016657	1	1	1
ENSG00000276075	AC027682.6	0.556957	0.00060886	1	1	1
ENSG00000106263	EIF3B	0.557007	0.00236472	1	1	1
ENSG00000148120	C9orf3	0.557238	0.00182465	1	1	1
ENSG00000112679	DUSP22	0.557262	0.000624392	1	1	1
ENSG00000128872	TMOD2	0.55728	0.00229814	1	1	1
ENSG00000116898	MRPS15	0.557327	0.00161279	1	1	1
ENSG00000113758	DBN1	0.557327	0.000904298	1	1	1
ENSG00000198818	SFT2D1	0.557362	0.00109878	1	1	1
ENSG00000127334	DYRK2	0.557394	0.000493733	1	1	1
ENSG00000158773	USF1	0.557435	0.0037151	1	1	1
ENSG00000253910	PCDHGB2	0.55745	0.00106761	1	1	1
ENSG00000213741	RPS29	0.557492	0.00176525	1	1	1
ENSG00000148399	DPH7	0.557731	0.000998125	1	1	1
ENSG00000125954	CHURC1-FNTB	0.557733	0.000581759	1	1	1
ENSG00000164171	ITGA2	0.557754	0.000553345	1	1	1
ENSG00000198727	MT-CYB	0.557807	0.00128075	1	0	1
ENSG00000140199	SLC12A6	0.557815	0.000738233	1	1	1
ENSG00000183978	COA3	0.55784	0.00139956	1	1	1
ENSG00000184185	KCNJ12	0.557846	0.000417815	1	1	1
ENSG00000065534	MYLK	0.557902	0.00047635	1	1	1
ENSG00000176428	VPS37D	0.557973	0.00060886	1	1	1
ENSG00000196689	TRPV1	0.558012	0.000794406	1	1	1
ENSG00000140538	NTRK3	0.55805	0.0013702	1	1	1
ENSG00000214253	FIS1	0.5582	0.000776185	1	1	1
ENSG00000103037	SETD6	0.558259	0.000862075	1	1	1
ENSG00000187164	SHTN1	0.558325	0.00148251	1	1	1
ENSG00000186364	NUDT17	0.558327	0.0012237	1	1	1
ENSG00000197601	FAR1	0.558327	0.00102006	1	1	1
ENSG00000168314	MOBP	0.558336	0.000683181	1	1	1
ENSG00000061987	MON2	0.558473	0.000613832	1	1	1
ENSG00000108961	RANGRF	0.558474	0.00114926	1	1	1
ENSG00000118263	KLF7	0.558491	0.000571074	1	1	1
ENSG00000224897	POT1-AS1	0.55855	0.00184463	1	1	1
ENSG00000078900	TP73	0.558551	0.00106995	1	1	1
ENSG00000112761	WISP3	0.558603	0.000849254	1	1	1
ENSG00000144224	UBXN4	0.558634	0.000463823	1	1	1
ENSG00000183578	TNFAIP8L3	0.558736	0.00153619	1	1	1
ENSG00000196408	NOXO1	0.558812	0.000446367	1	1	1
ENSG00000172817	CYP7B1	0.558816	0.000831762	1	1	1
ENSG00000185290	NUPR2	0.558886	0.0026235	1	1	1
ENSG00000053524	MCF2L2	0.558917	0.00358387	1	0	1
ENSG00000141580	WDR45B	0.558929	0.0010022	1	1	1
ENSG00000263647	BPTFP1	0.558938	0.000605355	1	1	1
ENSG00000187778	MCRS1	0.558948	0.000602218	1	1	1
ENSG00000182606	TRAK1	0.559064	0.00104554	1	1	1
ENSG00000174744	BRMS1	0.559079	0.00105232	1	1	1
ENSG00000258754	LINC01579	0.559097	0.000500881	1	1	1
ENSG00000184990	SIVA1	0.559146	0.00145655	1	1	1
ENSG00000167930	FAM234A	0.559149	0.00162175	1	1	1
ENSG00000108381	ASPA	0.559245	0.000446367	1	1	1
ENSG00000188266	HYKK	0.559264	0.00173565	1	1	1
ENSG00000126106	TMEM53	0.559264	0.00045366	1	1	1
ENSG00000228253	MT-ATP8	0.559265	0.00103026	1	1	1
ENSG00000109762	SNX25	0.559355	0.000567665	1	1	1
ENSG00000184900	SUMO3	0.559364	0.000491912	1	1	1
ENSG00000138448	ITGAV	0.559581	0.00218412	1	1	1
ENSG00000103121	CMC2	0.559616	0.00136802	1	1	1
ENSG00000161281	COX7A1	0.55962	0.00068572	1	1	1
ENSG00000076201	PTPN23	0.559678	0.000656989	1	1	1
ENSG00000028116	VRK2	0.559859	0.00146681	1	1	1
ENSG00000168172	HOOK3	0.559901	0.000798678	1	1	1
ENSG00000269881	AC004754.1	0.559937	0.00106761	1	1	1
ENSG00000078725	BRINP1	0.560014	0.00108338	1	1	1
ENSG00000134107	BHLHE40	0.560028	0.000652015	1	1	1
ENSG00000279618	ENSG00000279618	0.560063	0.0017113	1	1	1
ENSG00000269242	AC010422.3	0.560077	0.00768117	1	1	1
ENSG00000139546	TARBP2	0.560122	0.00129629	1	1	1
ENSG00000054148	PHPT1	0.560126	0.000882819	1	1	1
ENSG00000116691	MIIP	0.560139	0.00406415	1	1	1
ENSG00000105290	APLP1	0.560151	0.000716654	1	1	1
ENSG00000164647	STEAP1	0.560225	0.000938303	1	1	1
ENSG00000127412	TRPV5	0.560319	0.00137195	1	1	1
ENSG00000167900	TK1	0.560412	0.00125453	1	1	1
ENSG00000166823	MESP1	0.560508	0.000454286	1	1	1
ENSG00000009335	UBE3C	0.560529	0.00191185	1	1	1
ENSG00000221946	FXYD7	0.560652	0.000905908	1	1	1
ENSG00000225507	AC069282.1	0.560654	0.000801414	1	1	1
ENSG00000043514	TRIT1	0.560681	0.00217982	1	1	1
ENSG00000188452	CERKL	0.560692	0.000757244	1	1	1
ENSG00000103495	MAZ	0.560722	0.00117243	1	1	1
ENSG00000136754	ABI1	0.560723	0.00152664	1	1	1
ENSG00000141127	PRPSAP2	0.560728	0.0011728	1	1	1
ENSG00000242419	PCDHGC4	0.560735	0.00108102	1	1	1
ENSG00000167258	CDK12	0.560793	0.00047635	1	1	1
ENSG00000179588	ZFPM1	0.560805	0.00106081	1	1	1
ENSG00000138606	SHF	0.560835	0.000553014	1	1	1
ENSG00000224032	EPB41L4A-AS1	0.561016	0.00336187	1	1	1
ENSG00000087495	PHACTR3	0.561046	0.00158368	1	1	1
ENSG00000220804	LINC01881	0.561054	0.000716654	1	1	1
ENSG00000005075	POLR2J	0.561071	0.000664185	1	1	1
ENSG00000099810	MTAP	0.561107	0.00118493	1	1	1
ENSG00000205323	SARNP	0.561146	0.00198283	1	1	1
ENSG00000187742	SECISBP2	0.561148	0.00150191	1	1	1
ENSG00000170584	NUDCD2	0.561155	0.00178787	1	1	1
ENSG00000105325	FZR1	0.561169	0.00169266	1	1	1
ENSG00000104859	CLASRP	0.561226	0.000831762	1	1	1
ENSG00000255073	ZFP91-CNTF	0.561256	0.000617002	1	1	1
ENSG00000242960	FTH1P23	0.561264	0.000622055	1	1	1
ENSG00000101181	MTG2	0.561278	0.00235222	1	1	1
ENSG00000187186	AL162231.1	0.561291	0.000795915	1	1	1
ENSG00000167733	HSD11B1L	0.561292	0.000741781	1	1	1
ENSG00000253537	PCDHGA7	0.561357	0.00104366	1	0	1
ENSG00000173889	PHC3	0.561361	0.000594722	1	1	1
ENSG00000132854	KANK4	0.561483	0.000519134	1	1	1
ENSG00000254501	AP003068.1	0.561488	0.00094206	1	1	1
ENSG00000108588	CCDC47	0.561495	0.00122853	1	1	1
ENSG00000134207	SYT6	0.561523	0.000519134	1	1	1
ENSG00000228620	Z97056.1	0.561579	0.0015605	1	0	1
ENSG00000103569	AQP9	0.561608	0.00142947	1	0	1
ENSG00000197776	KLHDC1	0.561655	0.000844295	1	1	1
ENSG00000081665	ZNF506	0.561705	0.00114213	1	1	1
ENSG00000265491	RNF115	0.561748	0.00121809	1	1	1
ENSG00000064115	TM7SF3	0.561797	0.00155216	1	1	1
ENSG00000160226	C21orf2	0.561922	0.00131233	1	1	1
ENSG00000135362	PRR5L	0.562017	0.00084034	1	1	1
ENSG00000100379	KCTD17	0.562094	0.000500881	1	1	1
ENSG00000121775	TMEM39B	0.562141	0.00244311	1	1	1
ENSG00000179546	HTR1D	0.562156	0.00149568	1	1	1
ENSG00000128283	CDC42EP1	0.562184	0.00118561	1	1	1
ENSG00000198899	MT-ATP6	0.562206	0.0015662	1	0	1
ENSG00000169738	DCXR	0.562254	0.00146379	1	1	1
ENSG00000267163	ENSG00000267163	0.562256	0.00143877	1	1	1
ENSG00000105229	PIAS4	0.562296	0.00192731	1	1	1
ENSG00000151148	UBE3B	0.5623	0.00174505	1	1	1
ENSG00000034510	TMSB10	0.562344	0.000728216	1	1	1
ENSG00000160948	VPS28	0.56238	0.00148137	1	1	1
ENSG00000148344	PTGES	0.562462	0.000800646	1	1	1
ENSG00000198156	NPIPB6	0.562507	0.000476272	1	1	1
ENSG00000158792	SPATA2L	0.562594	0.000638936	1	1	1
ENSG00000231663	AL355472.1	0.562685	0.000905908	1	1	1
ENSG00000179134	SAMD4B	0.562702	0.00136234	1	1	1
ENSG00000249158	PCDHA11	0.56274	0.00178	1	1	1
ENSG00000279428	AC087164.2	0.562746	0.0015605	1	1	1
ENSG00000168028	RPSA	0.562803	0.00156608	1	1	1
ENSG00000179388	EGR3	0.562829	0.00145246	1	1	1
ENSG00000038295	TLL1	0.562927	0.000540051	1	1	1
ENSG00000275066	SYNRG	0.563027	0.000740107	1	1	1
ENSG00000239268	AC092691.1	0.563149	0.00193701	1	1	1
ENSG00000196455	PIK3R4	0.563166	0.0015662	1	1	1
ENSG00000047579	DTNBP1	0.563273	0.00102241	1	1	1
ENSG00000117000	RLF	0.563302	0.000801414	1	1	1
ENSG00000210082	MT-RNR2	0.563358	0.00309263	1	0	1
ENSG00000156026	MCU	0.563365	0.00117243	1	1	1
ENSG00000058600	POLR3E	0.563405	0.00144791	1	1	1
ENSG00000279332	AC090772.4	0.563733	0.00085398	1	1	1
ENSG00000258210	AC144548.1	0.563779	0.0031274	1	1	1
ENSG00000167680	SEMA6B	0.563824	0.0012006	1	1	1
ENSG00000196724	ZNF418	0.563948	0.00125257	1	1	1
ENSG00000228594	FNDC10	0.564017	0.000963084	1	1	1
ENSG00000198960	ARMCX6	0.564081	0.00133073	1	1	1
ENSG00000064995	TAF11	0.564148	0.00136234	1	1	1
ENSG00000102302	FGD1	0.564208	0.000848747	1	1	1
ENSG00000260924	LINC01311	0.564293	0.00226975	1	1	1
ENSG00000092847	AGO1	0.564354	0.00385288	1	1	1
ENSG00000102910	LONP2	0.564374	0.00152664	1	1	1
ENSG00000066777	ARFGEF1	0.564492	0.000840324	1	1	1
ENSG00000120685	PROSER1	0.56452	0.000821257	1	1	1
ENSG00000102981	PARD6A	0.564551	0.000837383	1	1	1
ENSG00000116005	PCYOX1	0.564655	0.00174267	1	1	1
ENSG00000050130	JKAMP	0.564684	0.000796744	1	1	1
ENSG00000132591	ERAL1	0.564747	0.000927206	1	1	1
ENSG00000165424	ZCCHC24	0.564881	0.00167292	1	1	1
ENSG00000163050	COQ8A	0.564899	0.00123297	1	1	1
ENSG00000176248	ANAPC2	0.564936	0.00144253	1	1	1
ENSG00000078699	CBFA2T2	0.564967	0.00151278	1	1	1
ENSG00000272916	AC022400.6	0.565072	0.00060886	1	1	1
ENSG00000160305	DIP2A	0.565087	0.00196299	1	1	1
ENSG00000121440	PDZRN3	0.565124	0.00121704	1	1	1
ENSG00000131969	ABHD12B	0.565128	0.00280898	1	1	1
ENSG00000131374	TBC1D5	0.565185	0.000645949	1	1	1
ENSG00000129315	CCNT1	0.565222	0.000759696	1	1	1
ENSG00000164896	FASTK	0.565426	0.00152615	1	1	1
ENSG00000262413	AC145207.2	0.565487	0.000759696	1	1	1
ENSG00000163166	IWS1	0.565494	0.00133011	1	1	1
ENSG00000166595	FAM96B	0.565589	0.000574447	1	1	1
ENSG00000248859	LINC01574	0.565695	0.00108338	1	1	1
ENSG00000165688	PMPCA	0.565728	0.00156608	1	1	1
ENSG00000119699	TGFB3	0.565745	0.00240378	1	1	1
ENSG00000206557	TRIM71	0.565816	0.00227974	1	1	1
ENSG00000198553	KCNRG	0.565878	0.00139447	1	1	1
ENSG00000100462	PRMT5	0.565881	0.0016944	1	1	1
ENSG00000227500	SCAMP4	0.565881	0.00256887	1	1	1
ENSG00000166402	TUB	0.565938	0.00167292	1	1	1
ENSG00000272617	COG8	0.565955	0.00159072	1	1	1
ENSG00000148660	CAMK2G	0.565996	0.00132985	1	1	1
ENSG00000264578	AC009630.3	0.566101	0.00132205	1	1	1
ENSG00000103089	FA2H	0.566132	0.000519134	1	1	1
ENSG00000161671	EMC10	0.566193	0.00254918	1	1	1
ENSG00000261329	AC016597.1	0.566214	0.000892971	1	1	1
ENSG00000162032	SPSB3	0.566251	0.00138186	1	1	1
ENSG00000182372	CLN8	0.566275	0.00159017	1	1	1
ENSG00000122390	NAA60	0.566333	0.00211469	1	1	1
ENSG00000110436	SLC1A2	0.566406	0.00188531	1	0	1
ENSG00000272112	AC011374.2	0.566424	0.000882819	1	1	1
ENSG00000138459	SLC35A5	0.566616	0.000700066	1	1	1
ENSG00000129194	SOX15	0.566622	0.000663405	1	1	1
ENSG00000151079	KCNA6	0.566635	0.00139674	1	1	1
ENSG00000197724	PHF2	0.566642	0.00192731	1	1	1
ENSG00000068650	ATP11A	0.566657	0.00123154	1	1	1
ENSG00000198242	RPL23A	0.566662	0.00152664	1	1	1
ENSG00000169592	INO80E	0.566665	0.00190383	1	1	1
ENSG00000107130	NCS1	0.566874	0.00161023	1	1	1
ENSG00000130520	LSM4	0.566974	0.000927206	1	1	1
ENSG00000275832	ARHGAP23	0.566978	0.00205104	1	1	1
ENSG00000183207	RUVBL2	0.567013	0.00199978	1	1	1
ENSG00000123908	AGO2	0.567116	0.0016697	1	1	1
ENSG00000160075	SSU72	0.567188	0.002609	1	1	1
ENSG00000109680	TBC1D19	0.567215	0.00233727	1	1	1
ENSG00000181004	BBS12	0.567252	0.0013702	1	1	1
ENSG00000109265	KIAA1211	0.56726	0.000685283	1	1	1
ENSG00000160679	CHTOP	0.567297	0.00153771	1	1	1
ENSG00000090534	THPO	0.567304	0.000755849	1	1	1
ENSG00000154874	CCDC144B	0.567427	0.000680133	1	1	1
ENSG00000242485	MRPL20	0.567458	0.00124377	1	1	1
ENSG00000121064	SCPEP1	0.567489	0.000917952	1	1	1
ENSG00000122644	ARL4A	0.567524	0.00269121	1	1	1
ENSG00000011009	LYPLA2	0.567539	0.00169983	1	1	1
ENSG00000092068	SLC7A8	0.567543	0.00134422	1	1	1
ENSG00000155816	FMN2	0.567639	0.00112649	1	1	1
ENSG00000117411	B4GALT2	0.567647	0.00127278	1	1	1
ENSG00000258881	AC007040.2	0.567662	0.00094206	1	1	1
ENSG00000137872	SEMA6D	0.567664	0.000967754	1	1	1
ENSG00000154945	ANKRD40	0.567694	0.00152003	1	1	1
ENSG00000101265	RASSF2	0.567709	0.00104167	1	1	1
ENSG00000131165	CHMP1A	0.567765	0.00199134	1	1	1
ENSG00000130713	EXOSC2	0.567863	0.00130714	1	1	1
ENSG00000132024	CC2D1A	0.567931	0.00148137	1	1	1
ENSG00000136144	RCBTB1	0.568007	0.00105135	1	1	1
ENSG00000143995	MEIS1	0.568123	0.00217907	1	1	1
ENSG00000177613	CSTF2T	0.568139	0.000935915	1	1	1
ENSG00000174125	TLR1	0.568146	0.00060886	1	1	1
ENSG00000167889	MGAT5B	0.568182	0.00136186	1	1	1
ENSG00000101134	DOK5	0.568247	0.00201667	1	1	1
ENSG00000169247	SH3TC2	0.568317	0.000641658	1	1	1
ENSG00000064393	HIPK2	0.56837	0.00217687	1	1	1
ENSG00000050628	PTGER3	0.568383	0.00205483	1	1	1
ENSG00000145833	DDX46	0.568526	0.000794406	1	1	1
ENSG00000158023	WDR66	0.568634	0.000801414	1	1	1
ENSG00000080819	CPOX	0.568637	0.00192731	1	1	1
ENSG00000112339	HBS1L	0.56866	0.00185173	1	1	1
ENSG00000157106	SMG1	0.568676	0.000652015	1	1	1
ENSG00000168256	NKIRAS2	0.569004	0.00205104	1	1	1
ENSG00000183726	TMEM50A	0.569041	0.000757811	1	1	1
ENSG00000267426	AC087289.3	0.569138	0.00130964	1	1	1
ENSG00000114019	AMOTL2	0.569174	0.00212278	1	1	1
ENSG00000125775	SDCBP2	0.569186	0.00121177	1	1	1
ENSG00000166289	PLEKHF1	0.569299	0.00310343	1	1	1
ENSG00000257337	AC068888.1	0.569308	0.00496888	1	1	1
ENSG00000106803	SEC61B	0.56938	0.000886181	1	1	1
ENSG00000280304	AC104260.2	0.569431	0.00229814	1	1	1
ENSG00000204356	NELFE	0.569443	0.00277989	1	1	1
ENSG00000101298	SNPH	0.569496	0.00144257	1	1	1
ENSG00000170542	SERPINB9	0.569503	0.00126853	1	1	1
ENSG00000198862	LTN1	0.569529	0.000832509	1	1	1
ENSG00000137563	GGH	0.569536	0.00211219	1	1	1
ENSG00000183479	TREX2	0.569562	0.00504013	1	1	1
ENSG00000270670	MARK2P16	0.569618	0.00319976	1	1	1
ENSG00000124789	NUP153	0.569709	0.00090944	1	1	1
ENSG00000158716	DUSP23	0.569714	0.00192013	1	1	1
ENSG00000204628	RACK1	0.569827	0.0026453	1	1	1
ENSG00000172794	RAB37	0.569873	0.000790744	1	1	1
ENSG00000260001	TGFBR3L	0.569926	0.00173406	1	1	1
ENSG00000198888	MT-ND1	0.569953	0.00208903	1	0	1
ENSG00000175602	CCDC85B	0.570012	0.00106219	1	1	1
ENSG00000198744	MTCO3P12	0.570035	0.00199145	1	1	1
ENSG00000141522	ARHGDIA	0.570122	0.00184026	1	1	1
ENSG00000158715	SLC45A3	0.570169	0.00131861	1	1	1
ENSG00000168939	SPRY3	0.570194	0.00090944	1	1	1
ENSG00000146122	DAAM2	0.570261	0.00460677	1	1	1
ENSG00000177551	NHLH2	0.570296	0.00108473	1	1	1
ENSG00000245293	AC096564.1	0.57034	0.00238135	1	1	1
ENSG00000260539	ENSG00000260539	0.570372	0.00228356	1	1	1
ENSG00000176658	MYO1D	0.57044	0.00246656	1	1	1
ENSG00000165219	GAPVD1	0.570517	0.00123429	1	1	1
ENSG00000235706	DICER1-AS1	0.570689	0.00240068	1	1	1
ENSG00000113578	FGF1	0.570771	0.00255582	1	1	1
ENSG00000167536	DHRS13	0.570794	0.00189129	1	1	1
ENSG00000117114	ADGRL2	0.571123	0.00155835	1	1	1
ENSG00000110011	DNAJC4	0.571265	0.00205346	1	1	1
ENSG00000164587	RPS14	0.571316	0.00172527	1	1	1
ENSG00000175115	PACS1	0.571374	0.000706604	1	1	1
ENSG00000114805	PLCH1	0.571383	0.00310343	1	1	1
ENSG00000127914	AKAP9	0.571414	0.000792078	1	1	1
ENSG00000136271	DDX56	0.571579	0.00177796	1	1	1
ENSG00000277363	SRCIN1	0.571639	0.00309219	1	1	1
ENSG00000100029	PES1	0.571641	0.00335579	1	1	1
ENSG00000273437	AC108673.3	0.571684	0.00112296	1	1	1
ENSG00000107968	MAP3K8	0.571753	0.00141556	1	1	1
ENSG00000073150	PANX2	0.571761	0.00140614	1	1	1
ENSG00000128242	GAL3ST1	0.571906	0.00166307	1	1	1
ENSG00000119787	ATL2	0.57193	0.0022822	1	1	1
ENSG00000007545	CRAMP1	0.57195	0.000994399	1	1	1
ENSG00000255275	AL080251.1	0.571998	0.00133225	1	1	1
ENSG00000065802	ASB1	0.5721	0.00178992	1	1	1
ENSG00000134215	VAV3	0.572139	0.0015587	1	1	1
ENSG00000258539	AC068896.1	0.572173	0.00222656	1	1	1
ENSG00000100097	LGALS1	0.572282	0.000709957	1	1	1
ENSG00000168090	COPS6	0.572343	0.00467531	1	1	1
ENSG00000163481	RNF25	0.572348	0.00156691	1	1	1
ENSG00000117266	CDK18	0.572374	0.00191187	1	1	1
ENSG00000007516	BAIAP3	0.572402	0.00205104	1	1	1
ENSG00000224186	C5orf66	0.572438	0.0015992	1	1	1
ENSG00000170775	GPR37	0.572477	0.00078037	1	1	1
ENSG00000239407	Z68871.1	0.572508	0.00217687	1	1	1
ENSG00000112293	GPLD1	0.572524	0.00236357	1	1	1
ENSG00000261069	AC124312.3	0.572552	0.0020277	1	0	1
ENSG00000153406	NMRAL1	0.572584	0.001129	1	1	1
ENSG00000167641	PPP1R14A	0.572586	0.000831762	1	1	1
ENSG00000257069	AP001453.3	0.572618	0.00194176	1	0	1
ENSG00000150627	WDR17	0.572632	0.005286	1	1	1
ENSG00000122026	RPL21	0.572713	0.00186895	1	1	1
ENSG00000173208	ABCD2	0.572754	0.00210738	1	1	1
ENSG00000254806	SYS1-DBNDD2	0.572765	0.00179872	1	1	1
ENSG00000155008	APOOL	0.572809	0.00114146	1	1	1
ENSG00000239697	TNFSF12	0.572845	0.000793085	1	1	1
ENSG00000196605	ZNF846	0.572848	0.00172403	1	1	1
ENSG00000107331	ABCA2	0.572852	0.0025159	1	1	1
ENSG00000278977	AC003101.3	0.572855	0.00178377	1	1	1
ENSG00000188322	SBK1	0.572879	0.00108807	1	1	1
ENSG00000100181	TPTEP1	0.572955	0.00226957	1	1	1
ENSG00000185973	TMLHE	0.573011	0.0018945	1	1	1
ENSG00000180992	MRPL14	0.573022	0.00176201	1	1	1
ENSG00000185818	NAT8L	0.573033	0.00176201	1	1	1
ENSG00000182150	ERCC6L2	0.573055	0.000866758	1	1	1
ENSG00000130119	GNL3L	0.573118	0.00163795	1	1	1
ENSG00000196189	SEMA4A	0.573201	0.00315315	1	1	1
ENSG00000117408	IPO13	0.573429	0.00239566	1	1	1
ENSG00000122378	FAM213A	0.573437	0.00246254	1	1	1
ENSG00000175224	ATG13	0.573447	0.00245161	1	1	1
ENSG00000185737	NRG3	0.57346	0.00165066	1	1	1
ENSG00000119650	IFT43	0.573494	0.00148137	1	1	1
ENSG00000127081	ZNF484	0.573556	0.00135671	1	1	1
ENSG00000196923	PDLIM7	0.573664	0.000896095	1	1	1
ENSG00000249853	HS3ST5	0.573679	0.00199145	1	1	1
ENSG00000173486	FKBP2	0.573709	0.00167591	1	1	1
ENSG00000173273	TNKS	0.573729	0.00152577	1	1	1
ENSG00000196365	LONP1	0.57374	0.00164189	1	1	1
ENSG00000132879	FBXO44	0.573796	0.00104896	1	1	1
ENSG00000133639	BTG1	0.573797	0.00205751	1	1	1
ENSG00000084072	PPIE	0.573809	0.00253262	1	1	1
ENSG00000100425	BRD1	0.573828	0.00253828	1	1	1
ENSG00000173890	GPR160	0.573872	0.000793085	1	1	1
ENSG00000141540	TTYH2	0.573908	0.0015069	1	1	1
ENSG00000152439	ZNF773	0.574009	0.00182643	1	1	1
ENSG00000136960	ENPP2	0.574027	0.000821246	1	1	1
ENSG00000116685	KIAA2013	0.574045	0.00246254	1	1	1
ENSG00000001497	LAS1L	0.574058	0.00279143	1	1	1
ENSG00000130695	CEP85	0.574101	0.00209575	1	1	1
ENSG00000169562	GJB1	0.574115	0.000921283	1	1	1
ENSG00000250033	SLC7A11-AS1	0.574141	0.00232998	1	0	1
ENSG00000257390	AC023055.1	0.574157	0.00107913	1	1	1
ENSG00000196132	MYT1	0.57418	0.00167292	1	1	1
ENSG00000163517	HDAC11	0.574235	0.00189383	1	1	1
ENSG00000137642	SORL1	0.574248	0.00414656	1	1	1
ENSG00000116711	PLA2G4A	0.574307	0.00184463	1	1	1
ENSG00000196968	FUT11	0.574309	0.0019879	1	1	1
ENSG00000137462	TLR2	0.574325	0.00432777	1	1	1
ENSG00000197077	KIAA1671	0.574411	0.00310343	1	1	1
ENSG00000158079	PTPDC1	0.574413	0.00860054	1	1	1
ENSG00000198793	MTOR	0.574466	0.00283437	1	1	1
ENSG00000180834	MAP6D1	0.574485	0.00240697	1	1	1
ENSG00000073849	ST6GAL1	0.574556	0.00141022	1	1	1
ENSG00000267673	FDX2	0.574593	0.00132587	1	1	1
ENSG00000277688	AC243585.2	0.574619	0.000954791	1	1	1
ENSG00000138100	TRIM54	0.57464	0.00248756	1	1	1
ENSG00000169946	ZFPM2	0.574722	0.00137195	1	1	1
ENSG00000167755	KLK6	0.5748	0.000798678	1	1	1
ENSG00000167578	RAB4B	0.574853	0.00310343	1	1	1
ENSG00000157483	MYO1E	0.574875	0.00122075	1	1	1
ENSG00000261678	SCRT1	0.574909	0.00187663	1	1	1
ENSG00000271892	AC026790.1	0.574918	0.00192731	1	1	1
ENSG00000131018	SYNE1	0.574938	0.00106235	1	1	1
ENSG00000272420	AL513477.2	0.575011	0.00102668	1	1	1
ENSG00000231427	LINC01445	0.575078	0.00104457	1	1	1
ENSG00000082074	FYB1	0.575135	0.00138813	1	1	1
ENSG00000224924	LINC00320	0.575135	0.00135355	1	1	1
ENSG00000203875	SNHG5	0.575142	0.00250526	1	1	1
ENSG00000218227	AC136632.1	0.575185	0.00164726	1	1	1
ENSG00000141552	ANAPC11	0.575192	0.000756558	1	1	1
ENSG00000186468	RPS23	0.575211	0.00239319	1	1	1
ENSG00000090273	NUDC	0.57528	0.00486482	1	1	1
ENSG00000178826	TMEM139	0.575289	0.00163795	1	1	1
ENSG00000237187	NR2F1-AS1	0.575302	0.00205483	1	1	1
ENSG00000112964	GHR	0.575488	0.00124587	1	1	1
ENSG00000269293	ZSCAN16-AS1	0.575498	0.0023478	1	1	1
ENSG00000175772	LINC01106	0.575537	0.00234681	1	1	1
ENSG00000114268	PFKFB4	0.575556	0.00231489	1	1	1
ENSG00000156958	GALK2	0.575577	0.0015992	1	1	1
ENSG00000139722	VPS37B	0.575605	0.00294305	1	1	1
ENSG00000177034	MTX3	0.575605	0.0015605	1	1	1
ENSG00000151726	ACSL1	0.575677	0.00221313	1	1	1
ENSG00000079805	DNM2	0.575698	0.00392923	1	1	1
ENSG00000187094	CCK	0.575735	0.00199217	1	1	1
ENSG00000138821	SLC39A8	0.575758	0.00148137	1	1	1
ENSG00000275963	AC008115.4	0.575796	0.00132985	1	1	1
ENSG00000124074	ENKD1	0.575807	0.00193884	1	1	1
ENSG00000107443	CCNJ	0.575867	0.00123429	1	1	1
ENSG00000114956	DGUOK	0.575892	0.0061091	1	1	1
ENSG00000099821	POLRMT	0.575968	0.00216847	1	1	1
ENSG00000159079	C21orf59	0.576037	0.00137195	1	1	1
ENSG00000119522	DENND1A	0.576064	0.00283437	1	1	1
ENSG00000159842	ABR	0.576093	0.0025847	1	1	1
ENSG00000006607	FARP2	0.576108	0.00239324	1	1	1
ENSG00000267228	AC012254.2	0.576127	0.00282236	1	1	1
ENSG00000149557	FEZ1	0.576156	0.00315396	1	1	1
ENSG00000258315	C17orf49	0.57621	0.00174267	1	1	1
ENSG00000177051	FBXO46	0.576215	0.192402	0	1	1
ENSG00000171443	ZNF524	0.576233	0.00130892	1	1	1
ENSG00000070729	CNGB1	0.576309	0.00371604	1	1	1
ENSG00000143162	CREG1	0.576407	0.00143831	1	1	1
ENSG00000272677	AC124016.1	0.576423	0.00277937	1	1	1
ENSG00000134243	SORT1	0.57647	0.00105577	1	1	1
ENSG00000103154	NECAB2	0.576584	0.00259062	1	1	1
ENSG00000174373	RALGAPA1	0.5766	0.00130789	1	1	1
ENSG00000135333	EPHA7	0.576632	0.0021561	1	1	1
ENSG00000232520	AC012507.2	0.576643	0.00259119	1	0	1
ENSG00000125691	RPL23	0.576657	0.00289157	1	1	1
ENSG00000250584	LINC01511	0.576662	0.00280898	1	1	1
ENSG00000225670	CADM3-AS1	0.576676	0.00304177	1	1	1
ENSG00000111962	UST	0.576689	0.000866861	1	1	1
ENSG00000254673	AC110275.1	0.576748	0.001129	1	1	1
ENSG00000269998	ENSG00000269998	0.576789	0.00236879	1	1	1
ENSG00000197603	C5orf42	0.576947	0.00130337	1	1	1
ENSG00000160345	C9orf116	0.576991	0.00108338	1	1	1
ENSG00000164897	TMUB1	0.577005	0.00255582	1	1	1
ENSG00000255423	EBLN2	0.577016	0.00116296	1	1	1
ENSG00000109472	CPE	0.577052	0.00301036	1	1	1
ENSG00000161526	SAP30BP	0.577091	0.00280224	1	1	1
ENSG00000197461	PDGFA	0.577149	0.00410272	1	1	1
ENSG00000169884	WNT10B	0.577164	0.0026938	1	1	1
ENSG00000167468	GPX4	0.577262	0.00142476	1	1	1
ENSG00000204323	SMIM5	0.577289	0.0035531	1	1	1
ENSG00000179859	RNF227	0.577392	0.00176604	1	1	1
ENSG00000234912	SNHG20	0.577403	0.00125257	1	1	1
ENSG00000068903	SIRT2	0.577477	0.00279519	1	1	1
ENSG00000051825	MPHOSPH9	0.57753	0.00149313	1	1	1
ENSG00000125743	SNRPD2	0.577543	0.00536734	1	1	1
ENSG00000007376	RPUSD1	0.577614	0.00106708	1	1	1
ENSG00000119333	WDR34	0.577643	0.00122934	1	1	1
ENSG00000040275	SPDL1	0.577716	0.00238439	1	1	1
ENSG00000204842	ATXN2	0.577767	0.00177686	1	1	1
ENSG00000196663	TECPR2	0.577856	0.00241485	1	1	1
ENSG00000142751	GPN2	0.57789	0.00187444	1	1	1
ENSG00000099625	CBARP	0.577934	0.00210271	1	1	1
ENSG00000265188	AP001496.3	0.577983	0.00265764	1	1	1
ENSG00000165194	PCDH19	0.578032	0.00364138	1	1	1
ENSG00000176946	THAP4	0.578088	0.00274959	1	1	1
ENSG00000223820	CFL1P1	0.57809	0.00214049	1	0	0
ENSG00000248508	SRP14-AS1	0.57809	0.00286907	1	1	1
ENSG00000163932	PRKCD	0.578116	0.00363348	1	1	1
ENSG00000154654	NCAM2	0.578122	0.0091034	1	1	1
ENSG00000261221	ZNF865	0.578133	0.00160277	1	1	1
ENSG00000100605	ITPK1	0.578184	0.00280898	1	1	1
ENSG00000135720	DYNC1LI2	0.578203	0.00205375	1	1	1
ENSG00000147789	ZNF7	0.578226	0.00364199	1	1	1
ENSG00000235961	PNMA6A	0.578309	0.00632026	1	1	1
ENSG00000078687	TNRC6C	0.578317	0.00343426	1	1	1
ENSG00000144229	THSD7B	0.578341	0.00317188	1	1	1
ENSG00000114993	RTKN	0.578401	0.00264147	1	1	1
ENSG00000179673	RPRML	0.57849	0.00392778	1	1	1
ENSG00000124831	LRRFIP1	0.578525	0.00203607	1	1	1
ENSG00000122735	DNAI1	0.578531	0.00165355	1	1	1
ENSG00000165282	PIGO	0.578578	0.00101551	1	1	1
ENSG00000102984	ZNF821	0.578582	0.00150801	1	1	1
ENSG00000138463	DIRC2	0.578617	0.001962	1	1	1
ENSG00000253485	PCDHGA5	0.578621	0.00282236	1	1	1
ENSG00000126005	MMP24OS	0.578623	0.000988419	1	1	1
ENSG00000023191	RNH1	0.578694	0.00253084	1	1	1
ENSG00000152767	FARP1	0.578761	0.00240027	1	1	1
ENSG00000268751	SCGB1B2P	0.578834	0.00153174	1	1	1
ENSG00000177076	ACER2	0.578857	0.00194424	1	0	1
ENSG00000137878	GCOM1	0.578869	0.00201292	1	1	1
ENSG00000196396	PTPN1	0.578903	0.00317426	1	1	1
ENSG00000135426	TESPA1	0.578913	0.00188009	1	1	1
ENSG00000167100	SAMD14	0.578963	0.00149027	1	1	1
ENSG00000185477	GPRIN3	0.578998	0.00152173	1	1	1
ENSG00000157978	LDLRAP1	0.579	0.00199648	1	1	1
ENSG00000197958	RPL12	0.579003	0.00296585	1	1	1
ENSG00000132906	CASP9	0.579034	0.00308903	1	1	1
ENSG00000130962	PRRG1	0.579146	0.00148402	1	1	1
ENSG00000119632	IFI27L2	0.579168	0.00148137	1	1	1
ENSG00000073417	PDE8A	0.5792	0.00137875	1	1	1
ENSG00000128815	WDFY4	0.579202	0.00260508	1	1	1
ENSG00000148450	MSRB2	0.579217	0.0026453	1	1	1
ENSG00000175455	CCDC14	0.579238	0.00167608	1	1	1
ENSG00000164741	DLC1	0.57932	0.00170161	1	1	1
ENSG00000106278	PTPRZ1	0.579321	0.00304511	1	1	1
ENSG00000167323	STIM1	0.57934	0.00252941	1	1	1
ENSG00000183576	SETD3	0.579345	0.00222358	1	1	1
ENSG00000008324	SS18L2	0.579415	0.00367942	1	1	1
ENSG00000136379	ABHD17C	0.579428	0.00146681	1	1	1
ENSG00000119782	FKBP1B	0.579531	0.00262935	1	1	1
ENSG00000156140	ADAMTS3	0.579546	0.00178552	1	1	1
ENSG00000141279	NPEPPS	0.579567	0.00263704	1	1	1
ENSG00000125746	EML2	0.579577	0.00329503	1	1	1
ENSG00000185565	LSAMP	0.579628	0.00282085	1	1	1
ENSG00000267618	AC004223.3	0.579629	0.00279562	1	1	1
ENSG00000148218	ALAD	0.57965	0.00298416	1	1	1
ENSG00000241553	ARPC4	0.579653	0.00419495	1	1	1
ENSG00000103245	NARFL	0.579683	0.00259115	1	1	1
ENSG00000149187	CELF1	0.579717	0.00256887	1	1	1
ENSG00000276259	AC009118.3	0.579771	0.00231317	1	1	1
ENSG00000101391	CDK5RAP1	0.579773	0.00268852	1	1	1
ENSG00000174917	C19orf70	0.579881	0.00176201	1	1	1
ENSG00000162664	ZNF326	0.579884	0.00238619	1	1	1
ENSG00000147804	SLC39A4	0.579886	0.00246254	1	1	1
ENSG00000243725	TTC4	0.579948	0.00237963	1	1	1
ENSG00000189319	FAM53B	0.57998	0.00313928	1	1	1
ENSG00000267601	AC022966.1	0.580053	0.00273778	1	1	1
ENSG00000198886	MT-ND4	0.580101	0.00393719	1	0	1
ENSG00000198944	SOWAHA	0.580105	0.00315396	1	1	1
ENSG00000122035	RASL11A	0.580129	0.00218368	1	1	1
ENSG00000105701	FKBP8	0.580139	0.00281397	1	1	1
ENSG00000259143	AL356017.1	0.580191	0.00212759	1	0	1
ENSG00000122033	MTIF3	0.580202	0.00264805	1	1	1
ENSG00000173821	RNF213	0.580424	0.00496888	1	1	1
ENSG00000188153	COL4A5	0.58047	0.00094206	1	1	1
ENSG00000198576	ARC	0.580533	0.00189383	1	1	1
ENSG00000163291	PAQR3	0.580597	0.0022493	1	1	1
ENSG00000140479	PCSK6	0.580641	0.00325595	1	1	1
ENSG00000141499	WRAP53	0.580682	0.00489127	1	1	1
ENSG00000162298	SYVN1	0.580707	0.00304177	1	1	1
ENSG00000141447	OSBPL1A	0.580712	0.00244311	1	1	1
ENSG00000142444	TIMM29	0.580791	0.00189799	1	1	1
ENSG00000204104	TRAF3IP1	0.580819	0.00259115	1	1	1
ENSG00000184162	NR2C2AP	0.580863	0.00134609	1	1	1
ENSG00000235194	PPP1R3E	0.580864	0.00240378	1	1	1
ENSG00000143256	PFDN2	0.580869	0.00265025	1	1	1
ENSG00000114388	NPRL2	0.580875	0.00280224	1	1	1
ENSG00000105722	ERF	0.580913	0.00356838	1	1	1
ENSG00000162885	B3GALNT2	0.580933	0.00636291	1	1	1
ENSG00000169313	P2RY12	0.580979	0.00368748	1	1	1
ENSG00000153904	DDAH1	0.581013	0.00215064	1	1	1
ENSG00000133226	SRRM1	0.581061	0.00337265	1	1	1
ENSG00000250959	GLUD1P3	0.581098	0.00279317	1	1	1
ENSG00000227825	SLC9A7P1	0.581127	0.00434748	1	1	1
ENSG00000118946	PCDH17	0.581161	0.00279353	1	1	1
ENSG00000165138	ANKS6	0.581166	0.00125257	1	1	1
ENSG00000147649	MTDH	0.581196	0.00120446	1	1	1
ENSG00000187630	DHRS4L2	0.5812	0.00144257	1	1	1
ENSG00000237973	MTCO1P12	0.581288	0.00219759	1	1	1
ENSG00000120992	LYPLA1	0.581328	0.00230078	1	1	1
ENSG00000135116	HRK	0.581401	0.00226975	1	1	1
ENSG00000112282	MED23	0.58141	0.00137195	1	1	1
ENSG00000167861	HID1	0.581477	0.00239324	1	1	1
ENSG00000224470	ATXN1L	0.581614	0.00280898	1	1	1
ENSG00000167118	URM1	0.581634	0.00286804	1	1	1
ENSG00000205309	NT5M	0.581638	0.00144257	1	1	1
ENSG00000246705	H2AFJ	0.581679	0.00382109	1	1	1
ENSG00000138286	FAM149B1	0.581746	0.00368748	1	1	1
ENSG00000161082	CELF5	0.581771	0.00247349	1	1	1
ENSG00000078098	FAP	0.581786	0.00209575	1	0	1
ENSG00000109390	NDUFC1	0.581841	0.00235393	1	1	1
ENSG00000178385	PLEKHM3	0.581889	0.00108338	1	1	1
ENSG00000105373	NOP53	0.58189	0.0029694	1	1	1
ENSG00000149218	ENDOD1	0.581958	0.00156691	1	1	1
ENSG00000132535	DLG4	0.581958	0.00282085	1	1	1
ENSG00000050820	BCAR1	0.581982	0.00332563	1	1	1
ENSG00000188011	RTP5	0.582006	0.00112581	1	1	1
ENSG00000062725	APPBP2	0.582116	0.00118641	1	1	1
ENSG00000138650	PCDH10	0.582135	0.00311019	1	1	1
ENSG00000196465	MYL6B	0.582209	0.00217687	1	1	1
ENSG00000254870	ATP6V1G2-DDX39B	0.582247	0.00280898	1	1	1
ENSG00000158089	GALNT14	0.582253	0.00278471	1	1	1
ENSG00000081237	PTPRC	0.582303	0.00150791	1	1	1
ENSG00000160325	CACFD1	0.582436	0.00149313	1	1	1
ENSG00000158555	GDPD5	0.582459	0.00156691	1	1	1
ENSG00000213516	RBMXL1	0.582498	0.00317794	1	1	1
ENSG00000080822	CLDND1	0.582522	0.00286839	1	1	1
ENSG00000095370	SH2D3C	0.582529	0.00230078	1	1	1
ENSG00000185915	KLHL34	0.58259	0.00269121	1	0	1
ENSG00000173598	NUDT4	0.582606	0.00388934	1	1	1
ENSG00000108651	UTP6	0.582655	0.00319019	1	1	1
ENSG00000271870	AC024060.1	0.58277	0.0033528	1	1	1
ENSG00000048471	SNX29	0.582775	0.00196056	1	1	1
ENSG00000142684	ZNF593	0.582783	0.0035783	1	1	1
ENSG00000115756	HPCAL1	0.582812	0.00128554	1	1	1
ENSG00000123064	DDX54	0.582895	0.00392274	1	1	1
ENSG00000087253	LPCAT2	0.58297	0.00186569	1	1	1
ENSG00000212907	MT-ND4L	0.582974	0.00351639	1	1	1
ENSG00000122386	ZNF205	0.583006	0.00306775	1	1	1
ENSG00000126803	HSPA2	0.583122	0.00183958	1	1	1
ENSG00000249786	EAF1-AS1	0.583224	0.00424752	1	1	1
ENSG00000132507	EIF5A	0.583235	0.00775261	1	1	1
ENSG00000134532	SOX5	0.583289	0.00426638	1	0	1
ENSG00000250305	TRMT9B	0.583329	0.00181723	1	1	1
ENSG00000182168	UNC5C	0.58333	0.0026453	1	1	1
ENSG00000170949	ZNF160	0.583339	0.00285489	1	1	1
ENSG00000184702	SEPT5	0.583361	0.00279727	1	1	1
ENSG00000197555	SIPA1L1	0.583425	0.00388733	1	1	1
ENSG00000103479	RBL2	0.58345	0.00131341	1	1	1
ENSG00000260934	AC130456.5	0.58349	0.00459363	1	1	1
ENSG00000108387	SEPT4	0.583527	0.00617428	1	1	1
ENSG00000196363	WDR5	0.583574	0.00160966	1	1	1
ENSG00000249859	PVT1	0.583601	0.00139349	1	1	1
ENSG00000162434	JAK1	0.583733	0.00332254	1	1	1
ENSG00000089558	KCNH4	0.583763	0.00343121	1	1	1
ENSG00000144228	SPOPL	0.583789	0.00160999	1	1	1
ENSG00000187556	NANOS3	0.583813	0.00184463	1	1	1
ENSG00000111817	DSE	0.58384	0.00111249	1	1	1
ENSG00000173621	LRFN4	0.583936	0.0019698	1	1	1
ENSG00000182154	MRPL41	0.583958	0.00179049	1	1	1
ENSG00000225339	AL354740.1	0.584004	0.00178	1	1	1
ENSG00000077380	DYNC1I2	0.58406	0.00421479	1	1	1
ENSG00000167281	RBFOX3	0.584085	0.00271174	1	1	1
ENSG00000132702	HAPLN2	0.584097	0.00165827	1	1	1
ENSG00000100596	SPTLC2	0.584165	0.00415562	1	1	1
ENSG00000107362	ABHD17B	0.584189	0.00430091	1	1	1
ENSG00000183092	BEGAIN	0.584307	0.00203607	1	1	1
ENSG00000168675	LDLRAD4	0.584308	0.00296585	1	1	1
ENSG00000270647	TAF15	0.58432	0.00279972	1	1	1
ENSG00000144893	MED12L	0.584373	0.0125945	1	1	1
ENSG00000133019	CHRM3	0.584394	0.00337338	1	1	1
ENSG00000204922	UQCC3	0.584433	0.00301535	1	1	1
ENSG00000102780	DGKH	0.584522	0.00539315	1	1	1
ENSG00000108239	TBC1D12	0.584538	0.00255582	1	1	1
ENSG00000196371	FUT4	0.584606	0.00237985	1	1	1
ENSG00000272016	ENSG00000272016	0.584665	0.00276207	1	1	1
ENSG00000172943	PHF8	0.584678	0.00210166	1	1	1
ENSG00000258674	AC011448.1	0.584737	0.00251796	1	1	1
ENSG00000160932	LY6E	0.584748	0.00281951	1	1	1
ENSG00000107798	LIPA	0.584784	0.00217687	1	1	1
ENSG00000065060	UHRF1BP1	0.584872	0.00176604	1	1	1
ENSG00000120088	CRHR1	0.584957	0.00242054	1	1	1
ENSG00000131143	COX4I1	0.584971	0.00421479	1	1	1
ENSG00000149742	SLC22A9	0.585001	0.00312184	1	0	1
ENSG00000156858	PRR14	0.585009	0.00374336	1	1	1
ENSG00000231999	LRRC8C-DT	0.585078	0.00246254	1	1	1
ENSG00000100726	TELO2	0.585109	0.00244412	1	1	1
ENSG00000129595	EPB41L4A	0.585252	0.00289719	1	1	1
ENSG00000146063	TRIM41	0.585439	0.00288816	1	1	1
ENSG00000264272	AC100786.2	0.585441	0.00474196	1	1	1
ENSG00000204381	LAYN	0.585481	0.00262935	1	1	1
ENSG00000087074	PPP1R15A	0.585512	0.0042506	1	1	1
ENSG00000136717	BIN1	0.585523	0.00619124	1	1	1
ENSG00000272695	GAS6-AS2	0.58553	0.00285336	1	1	1
ENSG00000159069	FBXW5	0.58558	0.00213561	1	1	1
ENSG00000111911	HINT3	0.585604	0.00627617	1	1	1
ENSG00000232888	RPS11P5	0.585698	0.00193026	1	1	1
ENSG00000206053	JPT2	0.58572	0.00369059	1	1	1
ENSG00000213713	PIGCP1	0.585727	0.0051002	1	1	1
ENSG00000104960	PTOV1	0.585731	0.00335579	1	1	1
ENSG00000125740	FOSB	0.585742	0.00151069	1	1	1
ENSG00000124203	ZNF831	0.585769	0.00371604	1	1	1
ENSG00000184014	DENND5A	0.585772	0.00297467	1	1	1
ENSG00000110711	AIP	0.585857	0.00251798	1	1	1
ENSG00000175264	CHST1	0.585858	0.00280898	1	1	1
ENSG00000008283	CYB561	0.586107	0.00280224	1	1	1
ENSG00000151746	BICD1	0.586111	0.00197127	1	1	1
ENSG00000167674	HDGFL2	0.586149	0.00536617	1	1	1
ENSG00000146411	SLC2A12	0.586171	0.00262935	1	1	1
ENSG00000152894	PTPRK	0.586171	0.00295434	1	1	1
ENSG00000197183	NOL4L	0.586213	0.00250044	1	1	1
ENSG00000105656	ELL	0.586258	0.00355286	1	1	1
ENSG00000145147	SLIT2	0.586323	0.00459995	1	1	1
ENSG00000114853	ZBTB47	0.586384	0.00404358	1	1	1
ENSG00000229036	VDAC1P8	0.586436	0.00272904	1	1	1
ENSG00000272418	AC090607.4	0.586442	0.00149568	1	1	1
ENSG00000243444	PALM2	0.586445	0.00205483	1	1	1
ENSG00000198598	MMP17	0.586569	0.00221313	1	1	1
ENSG00000114446	IFT57	0.586591	0.00325307	1	1	1
ENSG00000106785	TRIM14	0.5866	0.00178787	1	1	1
ENSG00000162695	SLC30A7	0.586613	0.00217442	1	1	1
ENSG00000185989	RASA3	0.586625	0.00481366	1	1	1
ENSG00000135525	MAP7	0.586626	0.00431251	1	1	1
ENSG00000204991	SPIRE2	0.586629	0.00167292	1	1	1
ENSG00000257553	AC034102.4	0.586643	0.00227114	1	1	1
ENSG00000221955	SLC12A8	0.586645	0.00616368	1	1	1
ENSG00000258643	BCL2L2-PABPN1	0.586688	0.00347439	1	1	1
ENSG00000131016	AKAP12	0.586691	0.00413843	1	1	1
ENSG00000204498	NFKBIL1	0.586708	0.0134494	1	1	1
ENSG00000111231	GPN3	0.586735	0.00183958	1	1	1
ENSG00000167397	VKORC1	0.586769	0.00218963	1	1	1
ENSG00000073711	PPP2R3A	0.586831	0.00164726	1	1	1
ENSG00000116793	PHTF1	0.586873	0.00240378	1	1	1
ENSG00000141933	TPGS1	0.58689	0.00310706	1	1	1
ENSG00000272182	AC135507.1	0.586899	0.00404358	1	1	1
ENSG00000144021	CIAO1	0.586901	0.00622695	1	1	1
ENSG00000111344	RASAL1	0.586909	0.0024492	1	1	1
ENSG00000141668	CBLN2	0.586928	0.00518045	1	1	1
ENSG00000205035	AC136759.1	0.586961	0.00302413	1	1	1
ENSG00000099864	PALM	0.586968	0.00166343	1	1	1
ENSG00000127540	UQCR11	0.587	0.00269413	1	1	1
ENSG00000186660	ZFP91	0.587011	0.00296585	1	1	1
ENSG00000172613	RAD9A	0.587036	0.00268852	1	1	1
ENSG00000143079	CTTNBP2NL	0.587055	0.00159185	1	1	1
ENSG00000128641	MYO1B	0.587105	0.00311803	1	1	1
ENSG00000260669	AL096870.2	0.587182	0.00418886	1	1	1
ENSG00000076513	ANKRD13A	0.587212	0.00359232	1	1	1
ENSG00000144366	GULP1	0.587268	0.00660981	1	1	1
ENSG00000174611	KY	0.587269	0.00368748	1	0	1
ENSG00000189067	LITAF	0.58728	0.00201566	1	1	1
ENSG00000106714	CNTNAP3	0.587325	0.00315396	1	0	1
ENSG00000254732	AP001931.1	0.587366	0.0015069	1	1	1
ENSG00000093183	SEC22C	0.587452	0.00211722	1	1	1
ENSG00000129250	KIF1C	0.587473	0.003408	1	1	1
ENSG00000123560	PLP1	0.587476	0.00125931	1	0	1
ENSG00000214135	AC132008.2	0.587515	0.00254883	1	1	1
ENSG00000185065	AC000068.1	0.587524	0.00240011	1	1	1
ENSG00000167535	CACNB3	0.587552	0.00304211	1	1	1
ENSG00000131188	PRR7	0.587621	0.00146379	1	1	1
ENSG00000269243	AC008894.2	0.587729	0.00788436	1	1	1
ENSG00000146858	ZC3HAV1L	0.587743	0.00306555	1	0	1
ENSG00000197056	ZMYM1	0.58776	0.00302685	1	1	1
ENSG00000150054	MPP7	0.587842	0.00286839	1	1	1
ENSG00000100722	ZC3H14	0.587847	0.00298416	1	1	1
ENSG00000213939	AC091153.1	0.587867	0.0051507	1	1	1
ENSG00000055950	MRPL43	0.587966	0.00179872	1	1	1
ENSG00000255126	AP003064.1	0.587969	0.00189129	1	1	1
ENSG00000148358	GPR107	0.587969	0.00169662	1	1	1
ENSG00000065809	FAM107B	0.587992	0.00235073	1	1	1
ENSG00000011638	TMEM159	0.588056	0.00907093	1	1	1
ENSG00000267022	AC067968.1	0.588111	0.00407839	1	1	1
ENSG00000270172	ENSG00000270172	0.58813	0.00336187	1	1	1
ENSG00000136874	STX17	0.588157	0.00155835	1	1	1
ENSG00000180616	SSTR2	0.588158	0.00295361	1	1	1
ENSG00000036530	CYP46A1	0.588191	0.00292397	1	1	1
ENSG00000147100	SLC16A2	0.588201	0.00388989	1	1	1
ENSG00000136867	SLC31A2	0.588202	0.00174	1	1	1
ENSG00000151687	ANKAR	0.588269	0.00233082	1	1	1
ENSG00000188026	RILPL1	0.588309	0.00525865	1	1	1
ENSG00000165752	STK32C	0.588367	0.00315298	1	1	1
ENSG00000261292	AC110491.1	0.58837	0.00347239	1	1	1
ENSG00000243199	AC115223.1	0.588386	0.00250403	1	1	1
ENSG00000129295	LRRC6	0.588414	0.00626469	1	1	1
ENSG00000137106	GRHPR	0.588514	0.00933247	1	1	1
ENSG00000169446	MMGT1	0.588573	0.0031599	1	1	1
ENSG00000102383	ZDHHC15	0.58858	0.00857999	1	1	1
ENSG00000064042	LIMCH1	0.588582	0.00384115	1	1	1
ENSG00000198840	MT-ND3	0.588611	0.00534511	1	0	1
ENSG00000155511	GRIA1	0.588684	0.00408276	1	1	1
ENSG00000087111	PIGS	0.588707	0.00239324	1	1	1
ENSG00000257342	AC025165.2	0.588725	0.00178	1	1	1
ENSG00000184924	PTRHD1	0.588788	0.00167358	1	1	1
ENSG00000265118	AC134669.1	0.588822	0.00135199	1	1	1
ENSG00000169118	CSNK1G1	0.588862	0.00213561	1	1	1
ENSG00000109586	GALNT7	0.58888	0.00259115	1	1	1
ENSG00000089177	KIF16B	0.588957	0.00354045	1	1	1
ENSG00000228409	CCT6P1	0.58901	0.0019698	1	1	1
ENSG00000120055	C10orf95	0.589048	0.00244412	1	1	1
ENSG00000187372	PCDHB13	0.589097	0.00413266	1	1	1
ENSG00000162910	MRPL55	0.589116	0.00566854	1	1	1
ENSG00000150867	PIP4K2A	0.589125	0.00161279	1	1	1
ENSG00000277726	AL109811.4	0.58916	0.00379576	1	1	1
ENSG00000117676	RPS6KA1	0.589168	0.00382913	1	1	1
ENSG00000125730	C3	0.589204	0.00393956	1	1	1
ENSG00000278615	C11orf98	0.589233	0.00454578	1	1	1
ENSG00000100056	ESS2	0.589236	0.0031967	1	1	1
ENSG00000233138	AL023584.1	0.589241	0.00402176	1	1	1
ENSG00000182979	MTA1	0.589245	0.00396678	1	1	1
ENSG00000112855	HARS2	0.589286	0.00283437	1	1	1
ENSG00000144647	POMGNT2	0.589373	0.00334262	1	1	1
ENSG00000130881	LRP3	0.589373	0.00304511	1	1	1
ENSG00000178057	NDUFAF3	0.589391	0.00357764	1	1	1
ENSG00000241728	AP001062.3	0.589408	0.00521109	1	1	1
ENSG00000266340	AC138207.7	0.589487	0.00212145	1	1	1
ENSG00000168795	ZBTB5	0.589491	0.00189383	1	1	1
ENSG00000264364	DYNLL2	0.5895	0.00347033	1	1	1
ENSG00000132274	TRIM22	0.589516	0.00394926	1	1	1
ENSG00000262732	AC010401.1	0.589538	0.00306597	1	0	1
ENSG00000146556	WASH2P	0.589597	0.00310343	1	1	1
ENSG00000279529	AC008764.8	0.589646	0.00404358	1	1	1
ENSG00000197969	VPS13A	0.589705	0.00600399	1	1	1
ENSG00000136158	SPRY2	0.589723	0.00241602	1	1	1
ENSG00000047315	POLR2B	0.58973	0.00434394	1	1	1
ENSG00000279355	AGPAT4-IT1	0.589753	0.00227114	1	1	1
ENSG00000144868	TMEM108	0.589765	0.00430591	1	1	1
ENSG00000188467	SLC24A5	0.589805	0.0065022	1	1	1
ENSG00000135312	HTR1B	0.589846	0.0033902	1	0	1
ENSG00000179632	MAF1	0.589879	0.00385288	1	1	1
ENSG00000175077	RTP1	0.589927	0.00367787	1	1	1
ENSG00000164855	TMEM184A	0.589928	0.0049248	1	1	1
ENSG00000165323	FAT3	0.589948	0.0047902	1	1	1
ENSG00000159905	ZNF221	0.589973	0.00213921	1	1	1
ENSG00000119285	HEATR1	0.58998	0.00280898	1	1	1
ENSG00000270231	NBPF8	0.590016	0.0015662	1	1	1
ENSG00000060491	OGFR	0.590019	0.00351639	1	1	1
ENSG00000111249	CUX2	0.590025	0.00364199	1	1	1
ENSG00000100276	RASL10A	0.590052	0.00321446	1	1	1
ENSG00000143436	MRPL9	0.590059	0.00545961	1	1	1
ENSG00000267261	AC099811.2	0.590077	0.00296585	1	1	1
ENSG00000141505	ASGR1	0.590082	0.00436425	1	1	1
ENSG00000237126	AC073254.1	0.590103	0.00335579	1	1	1
ENSG00000178996	SNX18	0.59013	0.0023478	1	1	1
ENSG00000106245	BUD31	0.590211	0.00437286	1	1	1
ENSG00000127220	ABHD8	0.590282	0.00413266	1	1	1
ENSG00000100116	GCAT	0.590297	0.00280898	1	1	1
ENSG00000225877	PSG8-AS1	0.590329	0.00246191	1	1	1
ENSG00000240972	MIF	0.590354	0.00276386	1	1	1
ENSG00000127863	TNFRSF19	0.590416	0.00169983	1	1	1
ENSG00000001631	KRIT1	0.590445	0.00247622	1	1	1
ENSG00000154118	JPH3	0.590506	0.00307979	1	1	1
ENSG00000226937	CEP164P1	0.590508	0.00216847	1	1	1
ENSG00000150681	RGS18	0.590613	0.00503671	1	1	1
ENSG00000101180	HRH3	0.590656	0.00297214	1	1	1
ENSG00000267470	ZNF571-AS1	0.590661	0.00331069	1	1	1
ENSG00000082556	OPRK1	0.590703	0.00405026	1	1	1
ENSG00000251201	TMED7-TICAM2	0.590742	0.0035707	1	0	1
ENSG00000100731	PCNX1	0.590757	0.00149377	1	1	1
ENSG00000242950	ERVW-1	0.590798	0.00265025	1	1	1
ENSG00000260081	AF274858.1	0.590842	0.0031967	1	1	1
ENSG00000119121	TRPM6	0.5909	0.0035707	1	1	1
ENSG00000145241	CENPC	0.590948	0.00182643	1	1	1
ENSG00000109790	KLHL5	0.590988	0.00382267	1	1	1
ENSG00000238045	AC009133.1	0.590992	0.00475629	1	1	1
ENSG00000139517	LNX2	0.591023	0.00213921	1	1	1
ENSG00000198121	LPAR1	0.591206	0.00493249	1	1	1
ENSG00000145860	RNF145	0.591338	0.00347439	1	1	1
ENSG00000065054	SLC9A3R2	0.591382	0.00345124	1	1	1
ENSG00000179262	RAD23A	0.591418	0.0154063	1	1	1
ENSG00000130772	MED18	0.591468	0.00315396	1	1	1
ENSG00000270558	AC025449.1	0.591533	0.00193873	1	1	1
ENSG00000170248	PDCD6IP	0.591556	0.00159266	1	1	1
ENSG00000198785	GRIN3A	0.59157	0.00278162	1	1	1
ENSG00000175550	DRAP1	0.591606	0.00452442	1	1	1
ENSG00000198947	DMD	0.591681	0.00580412	1	1	1
ENSG00000136682	CBWD2	0.59174	0.00569736	1	1	1
ENSG00000251455	AC092611.1	0.591757	0.00296014	1	1	1
ENSG00000107281	NPDC1	0.591757	0.00347169	1	1	1
ENSG00000185024	BRF1	0.59182	0.00436598	1	1	1
ENSG00000198963	RORB	0.591825	0.00359483	1	1	1
ENSG00000278991	AC090181.3	0.591833	0.00508926	1	1	1
ENSG00000185049	NELFA	0.591838	0.00359129	1	1	1
ENSG00000178860	MSC	0.59185	0.00416328	1	1	1
ENSG00000138593	SECISBP2L	0.591878	0.00393956	1	1	1
ENSG00000149633	KIAA1755	0.591894	0.00414857	1	1	1
ENSG00000205116	TMEM88B	0.591922	0.00234186	1	1	1
ENSG00000091129	NRCAM	0.59196	0.00626577	1	1	1
ENSG00000159399	HK2	0.592029	0.00394486	1	1	1
ENSG00000268518	AC020909.2	0.592105	0.00197127	1	1	1
ENSG00000235098	ANKRD65	0.592206	0.00421935	1	1	1
ENSG00000135439	AGAP2	0.592231	0.00280898	1	1	1
ENSG00000078487	ZCWPW1	0.592305	0.00396078	1	1	1
ENSG00000116871	MAP7D1	0.592342	0.00374336	1	1	1
ENSG00000175634	RPS6KB2	0.592346	0.00660949	1	1	1
ENSG00000165995	CACNB2	0.592368	0.00285375	1	1	1
ENSG00000128512	DOCK4	0.592405	0.00239751	1	1	1
ENSG00000177868	SVBP	0.592499	0.00416886	1	1	1
ENSG00000173083	HPSE	0.59261	0.00196056	1	1	1
ENSG00000106799	TGFBR1	0.592704	0.00499684	1	1	1
ENSG00000174886	NDUFA11	0.592713	0.00496888	1	1	1
ENSG00000274029	AC069209.1	0.592754	0.00539598	1	1	1
ENSG00000115507	OTX1	0.592789	0.00417452	1	0	1
ENSG00000257270	AL928654.2	0.592841	0.00517587	1	1	1
ENSG00000137672	TRPC6	0.592849	0.0051393	1	1	1
ENSG00000154222	CC2D1B	0.592889	0.00884776	1	1	1
ENSG00000149926	FAM57B	0.592893	0.0025486	1	1	1
ENSG00000079308	TNS1	0.592942	0.0050703	1	1	1
ENSG00000169860	P2RY1	0.592964	0.00472697	1	1	1
ENSG00000180879	SSR4	0.592976	0.00893523	1	1	1
ENSG00000203280	AL022323.1	0.593023	0.00473694	1	1	1
ENSG00000130876	SLC7A10	0.593038	0.00327645	1	1	1
ENSG00000174136	RGMB	0.593057	0.00589603	1	1	1
ENSG00000123473	STIL	0.593146	0.00315664	1	1	1
ENSG00000120519	SLC10A7	0.593199	0.0023545	1	1	1
ENSG00000106133	NSUN5P2	0.593229	0.00702085	1	1	1
ENSG00000185009	AP3M1	0.593254	0.00352563	1	1	1
ENSG00000137824	RMDN3	0.593261	0.00297467	1	1	1
ENSG00000250510	GPR162	0.593267	0.00327042	1	1	1
ENSG00000050165	DKK3	0.593282	0.00562434	1	1	1
ENSG00000164935	DCSTAMP	0.593316	0.00427637	1	1	1
ENSG00000223573	TINCR	0.593362	0.00618456	1	1	1
ENSG00000160058	BSDC1	0.593418	0.0234099	1	1	1
ENSG00000068745	IP6K2	0.59348	0.00519934	1	1	1
ENSG00000144535	DIS3L2	0.59353	0.00489127	1	1	1
ENSG00000188343	FAM92A	0.593567	0.00521109	1	1	1
ENSG00000155090	KLF10	0.593589	0.00199648	1	1	1
ENSG00000243232	PCDHAC2	0.593689	0.00963897	1	1	1
ENSG00000163288	GABRB1	0.593785	0.00228376	1	1	1
ENSG00000137942	FNBP1L	0.593821	0.0051303	1	1	1
ENSG00000171291	ZNF439	0.593891	0.00282236	1	1	1
ENSG00000172809	RPL38	0.593892	0.00538531	1	1	1
ENSG00000180917	CMTR2	0.593902	0.00336965	1	1	1
ENSG00000196562	SULF2	0.593904	0.00263193	1	1	1
ENSG00000129003	VPS13C	0.594061	0.00205375	1	1	1
ENSG00000254838	GVINP1	0.594154	0.00391777	1	0	1
ENSG00000261061	AC092718.4	0.594172	0.00433355	1	1	1
ENSG00000151882	CCL28	0.594173	0.00532056	1	1	1
ENSG00000162302	RPS6KA4	0.594212	0.00393717	1	1	1
ENSG00000162687	KCNT2	0.594251	0.00695011	1	1	1
ENSG00000166147	FBN1	0.594346	0.00210267	1	1	1
ENSG00000121742	GJB6	0.594364	0.00492886	1	0	1
ENSG00000141098	GFOD2	0.594531	0.00282085	1	1	1
ENSG00000172005	MAL	0.594626	0.0035707	1	1	1
ENSG00000237517	DGCR5	0.594675	0.00368748	1	1	1
ENSG00000186318	BACE1	0.594738	0.00701837	1	1	1
ENSG00000178175	ZNF366	0.594813	0.00534405	1	0	1
ENSG00000203993	ARRDC1-AS1	0.59485	0.00635815	1	1	1
ENSG00000187109	NAP1L1	0.594854	0.00525447	1	1	1
ENSG00000198265	HELZ	0.594857	0.00406705	1	1	1
ENSG00000137145	DENND4C	0.594869	0.00689627	1	0	1
ENSG00000079156	OSBPL6	0.594896	0.004916	1	1	1
ENSG00000144283	PKP4	0.594939	0.00336249	1	1	1
ENSG00000102699	PARP4	0.59498	0.00288536	1	1	1
ENSG00000162194	LBHD1	0.595002	0.0029694	1	1	1
ENSG00000260918	AC107398.3	0.595035	0.00508926	1	1	1
ENSG00000172318	B3GALT1	0.595046	0.00590281	1	1	1
ENSG00000100139	MICALL1	0.59512	0.00993285	1	1	1
ENSG00000048405	ZNF800	0.595141	0.00191878	1	1	1
ENSG00000146067	FAM193B	0.595161	0.00402031	1	1	1
ENSG00000196812	ZSCAN16	0.595163	0.00576264	1	1	1
ENSG00000111615	KRR1	0.595168	0.00682336	1	1	1
ENSG00000166086	JAM3	0.595301	0.00491532	1	1	1
ENSG00000130813	C19orf66	0.595321	0.00485525	1	1	1
ENSG00000196549	MME	0.595502	0.00348805	1	1	1
ENSG00000187210	GCNT1	0.595577	0.00431386	1	1	1
ENSG00000232748	AC135050.1	0.59567	0.00514364	1	1	1
ENSG00000147642	SYBU	0.595709	0.00394518	1	1	1
ENSG00000137221	TJAP1	0.595712	0.00538796	1	1	1
ENSG00000170989	S1PR1	0.595758	0.00279562	1	1	1
ENSG00000240225	ZNF542P	0.595768	0.00186194	1	1	1
ENSG00000085511	MAP3K4	0.59578	0.00499684	1	1	1
ENSG00000169228	RAB24	0.595794	0.00321446	1	1	1
ENSG00000165716	FAM69B	0.59586	0.00347239	1	1	1
ENSG00000228223	HCG11	0.595884	0.00620849	1	1	1
ENSG00000168653	NDUFS5	0.595923	0.00472697	1	1	1
ENSG00000087086	FTL	0.595955	0.0106963	1	0	1
ENSG00000121653	MAPK8IP1	0.596006	0.00392778	1	1	1
ENSG00000160633	SAFB	0.596085	0.00609937	1	1	1
ENSG00000111361	EIF2B1	0.596124	0.00592709	1	1	1
ENSG00000253200	AC037459.3	0.596135	0.00415	1	1	1
ENSG00000175104	TRAF6	0.596158	0.00212006	1	1	1
ENSG00000196083	IL1RAP	0.596161	0.00416052	1	1	1
ENSG00000168297	PXK	0.596164	0.0055279	1	1	1
ENSG00000171303	KCNK3	0.5962	0.00389276	1	1	1
ENSG00000071242	RPS6KA2	0.596244	0.00545961	1	1	1
ENSG00000126368	NR1D1	0.596297	0.00250526	1	1	1
ENSG00000175305	CCNE2	0.596299	0.00374336	1	1	1
ENSG00000149357	LAMTOR1	0.596402	0.00405654	1	1	1
ENSG00000143324	XPR1	0.59641	0.00425938	1	1	1
ENSG00000119402	FBXW2	0.596422	0.00252941	1	1	1
ENSG00000064787	BCAS1	0.596428	0.00545961	1	1	1
ENSG00000183648	NDUFB1	0.596462	0.004916	1	1	1
[truncated: 8,132 more rows]

## Sheet: AD Union DV Genes BY
	gene_symbol	SD_ratio	adj_pval	indicator_clrDV	indicator_MDSeq	indicator_gamlss_BY
ENSG00000176165	FOXG1	0.275375	1.56632e-12	1	1	1
ENSG00000124249	KCNK15	0.364832	8.13953e-08	1	1	1
ENSG00000004848	ARX	0.374842	1.84541e-07	1	1	1
ENSG00000196110	ZNF699	0.388518	1.16939e-06	1	1	1
ENSG00000203618	GP1BB	0.394778	5.03458e-07	1	1	1
ENSG00000196639	HRH1	0.396934	3.63221e-06	1	1	1
ENSG00000255301	AP002893.1	0.403184	2.63979e-06	1	1	1
ENSG00000270689	BUD13P1	0.407207	1.33575e-06	1	1	1
ENSG00000011376	LARS2	0.408065	1.86363e-06	1	1	1
ENSG00000141456	PELP1	0.410449	6.82409e-07	1	1	1
ENSG00000279553	ENSG00000279553	0.411055	3.05897e-06	1	1	1
ENSG00000267890	AC010624.2	0.411537	1.33575e-06	1	1	1
ENSG00000237522	NONOP2	0.411845	3.02343e-06	1	1	1
ENSG00000253861	SLC2A3P1	0.418414	8.49829e-06	1	1	1
ENSG00000136141	LRCH1	0.419181	1.86363e-06	1	1	1
ENSG00000236668	AC006450.3	0.419446	4.0061e-06	1	1	1
ENSG00000261096	AC073476.3	0.42177	6.46767e-06	1	1	1
ENSG00000172349	IL16	0.421797	1.35197e-05	1	1	1
ENSG00000136925	TSTD2	0.423082	7.54988e-06	1	1	1
ENSG00000106689	LHX2	0.425017	5.57253e-06	1	1	1
ENSG00000140939	NOL3	0.426811	1.14328e-05	1	1	1
ENSG00000104969	SGTA	0.429466	1.6087e-05	1	1	1
ENSG00000114450	GNB4	0.430105	1.47326e-05	1	1	1
ENSG00000273217	AC008695.1	0.431365	1.08454e-05	1	1	1
ENSG00000276547	PCDHGB5	0.431998	1.90854e-05	1	1	1
ENSG00000204435	CSNK2B	0.434287	6.46767e-06	1	1	1
ENSG00000229152	ANKRD10-IT1	0.434505	7.58176e-06	1	1	1
ENSG00000132323	ILKAP	0.434632	1.0638e-05	1	1	1
ENSG00000130733	YIPF2	0.435018	1.17047e-05	1	1	1
ENSG00000169221	TBC1D10B	0.435719	1.40767e-05	1	1	1
ENSG00000267520	AC010733.2	0.437834	7.86151e-06	1	1	1
ENSG00000261934	PCDHGA9	0.438304	1.19392e-05	1	1	1
ENSG00000177600	RPLP2	0.44085	2.40299e-05	1	1	1
ENSG00000155287	SLC25A28	0.440949	1.14328e-05	1	1	1
ENSG00000076924	XAB2	0.441164	1.42211e-05	1	1	1
ENSG00000090054	SPTLC1	0.441525	1.08454e-05	1	1	1
ENSG00000135776	ABCB10	0.442724	6.46767e-06	1	1	1
ENSG00000181418	DDN	0.443848	8.49829e-06	1	1	1
ENSG00000089902	RCOR1	0.443855	3.63221e-06	1	1	1
ENSG00000106400	ZNHIT1	0.444468	4.36658e-05	1	1	1
ENSG00000071889	FAM3A	0.444969	4.81158e-05	1	1	1
ENSG00000153266	FEZF2	0.446892	1.14886e-05	1	1	1
ENSG00000171604	CXXC5	0.44714	6.27525e-05	1	1	1
ENSG00000214026	MRPL23	0.447201	1.40767e-05	1	1	1
ENSG00000280173	AC104447.1	0.448363	1.35197e-05	1	1	1
ENSG00000010244	ZNF207	0.449111	4.79661e-06	1	1	1
ENSG00000107036	RIC1	0.44962	8.49829e-06	1	1	1
ENSG00000176994	SMCR8	0.449673	3.26876e-05	1	1	1
ENSG00000130522	JUND	0.450152	1.9282e-05	1	1	1
ENSG00000169020	ATP5ME	0.451004	3.12211e-05	1	1	1
ENSG00000184209	SNRNP35	0.451346	3.44596e-05	1	1	1
ENSG00000069020	MAST4	0.45224	0.0110606	1	1	1
ENSG00000047849	MAP4	0.452342	1.96308e-05	1	1	1
ENSG00000269145	AC007192.2	0.452457	8.49829e-06	1	1	1
ENSG00000171222	SCAND1	0.452629	3.44596e-05	1	1	1
ENSG00000241111	PRICKLE2-AS1	0.452882	3.44596e-05	1	1	1
ENSG00000204524	ZNF805	0.453604	1.40767e-05	1	1	1
ENSG00000169692	AGPAT2	0.454731	7.58176e-06	1	1	1
ENSG00000134222	PSRC1	0.455115	1.08454e-05	1	1	1
ENSG00000172985	SH3RF3	0.455215	1.35197e-05	1	1	1
ENSG00000132849	PATJ	0.455221	1.60241e-05	1	1	1
ENSG00000175756	AURKAIP1	0.455482	1.9282e-05	1	1	1
ENSG00000178502	KLHL11	0.456639	4.81158e-05	1	1	1
ENSG00000182472	CAPN12	0.45676	7.65196e-05	1	1	1
ENSG00000186010	NDUFA13	0.456877	4.1802e-05	1	1	1
ENSG00000185070	FLRT2	0.457524	0.000303675	1	1	1
ENSG00000226439	AC108161.1	0.457668	7.98836e-06	1	1	1
ENSG00000150471	ADGRL3	0.457683	8.08621e-05	1	1	1
ENSG00000105258	POLR2I	0.457692	4.627e-05	1	1	1
ENSG00000165644	COMTD1	0.457819	1.14886e-05	1	1	1
ENSG00000071859	FAM50A	0.457823	4.18743e-05	1	1	1
ENSG00000260916	CCPG1	0.45799	4.39893e-05	1	1	1
ENSG00000142546	NOSIP	0.458487	8.49829e-06	1	1	1
ENSG00000266728	AC015688.5	0.458525	1.5616e-05	1	1	1
ENSG00000223343	AC137630.1	0.458627	3.70882e-05	1	1	1
ENSG00000130590	SAMD10	0.458642	1.14328e-05	1	1	1
ENSG00000069667	RORA	0.459395	3.58504e-05	1	1	1
ENSG00000242539	AC007620.2	0.459407	2.71725e-05	1	1	1
ENSG00000256973	AC053513.1	0.459549	6.27525e-05	1	1	1
ENSG00000010219	DYRK4	0.459997	3.26876e-05	1	1	1
ENSG00000185386	MAPK11	0.460892	1.14328e-05	1	1	1
ENSG00000034239	EFCAB1	0.460913	1.40767e-05	1	1	1
ENSG00000159899	NPR2	0.460953	8.73059e-06	1	1	1
ENSG00000160408	ST6GALNAC6	0.461306	1.22894e-05	1	1	1
ENSG00000164610	RP9	0.462043	5.6265e-05	1	1	1
ENSG00000160973	FOXH1	0.462135	1.26771e-05	1	1	1
ENSG00000079819	EPB41L2	0.462554	8.36822e-06	1	1	1
ENSG00000099624	ATP5F1D	0.462724	4.05304e-05	1	1	1
ENSG00000260500	AC010336.2	0.462782	1.77117e-05	1	1	1
ENSG00000160799	CCDC12	0.46316	3.25145e-05	1	1	1
ENSG00000033867	SLC4A7	0.463262	4.10964e-05	1	1	1
ENSG00000137135	ARHGEF39	0.463788	3.46037e-05	1	1	1
ENSG00000167178	ISLR2	0.464645	2.68292e-05	1	1	1
ENSG00000186960	LINC01551	0.464821	1.90854e-05	1	1	1
ENSG00000171159	C9orf16	0.464886	1.35197e-05	1	1	1
ENSG00000258677	AC022826.2	0.465239	4.43319e-05	1	1	1
ENSG00000179271	GADD45GIP1	0.465907	3.59738e-05	1	1	1
ENSG00000213462	ERV3-1	0.46625	4.36658e-05	1	1	1
ENSG00000130175	PRKCSH	0.466304	3.59738e-05	1	1	1
ENSG00000103942	HOMER2	0.466354	3.63206e-05	1	1	1
ENSG00000171365	CLCN5	0.467168	1.9282e-05	1	1	1
ENSG00000112706	IMPG1	0.467383	2.98006e-05	1	1	1
ENSG00000103363	ELOB	0.467603	3.48522e-05	1	1	1
ENSG00000204950	LRRC10B	0.467753	3.44596e-05	1	1	1
ENSG00000100142	POLR2F	0.467824	3.44596e-05	1	1	1
ENSG00000173113	TRMT112	0.468291	3.27115e-05	1	1	1
ENSG00000264044	AC005726.2	0.468414	4.18743e-05	1	1	1
ENSG00000008988	RPS20	0.468422	4.43319e-05	1	1	1
ENSG00000167257	RNF214	0.468429	4.18743e-05	1	1	1
ENSG00000168061	SAC3D1	0.468508	7.41143e-05	1	1	1
ENSG00000164828	SUN1	0.468955	1.90854e-05	1	1	1
ENSG00000124172	ATP5F1E	0.468983	3.26876e-05	1	1	1
ENSG00000265794	AC005899.4	0.468995	4.39257e-05	1	1	1
ENSG00000141699	RETREG3	0.469493	5.16112e-05	1	1	1
ENSG00000162924	REL	0.469647	5.29334e-05	1	1	1
ENSG00000273419	AC004877.1	0.470057	1.90854e-05	1	1	1
ENSG00000105642	KCNN1	0.470647	3.44596e-05	1	1	1
ENSG00000268565	AC005339.1	0.470798	2.40299e-05	1	1	1
ENSG00000117691	NENF	0.47108	5.88282e-05	1	1	1
ENSG00000160813	PPP1R35	0.471569	3.27115e-05	1	1	1
ENSG00000059915	PSD	0.472213	4.43319e-05	1	1	1
ENSG00000167526	RPL13	0.472836	6.52851e-05	1	1	1
ENSG00000166441	RPL27A	0.472913	6.48217e-05	1	1	1
ENSG00000203485	INF2	0.472948	1.14328e-05	1	1	1
ENSG00000197343	ZNF655	0.473378	2.32609e-05	1	1	1
ENSG00000186907	RTN4RL2	0.473519	4.39257e-05	1	1	1
ENSG00000112763	BTN2A1	0.473539	2.31646e-05	1	1	1
ENSG00000138771	SHROOM3	0.474014	1.4408e-05	1	1	1
ENSG00000241370	RPP21	0.474398	3.27115e-05	1	1	1
ENSG00000104897	SF3A2	0.474419	6.52851e-05	1	1	1
ENSG00000265784	AC006441.3	0.474457	3.27115e-05	1	1	1
ENSG00000214652	ZNF727	0.47462	4.18743e-05	1	1	1
ENSG00000168758	SEMA4C	0.474847	8.5261e-05	1	1	1
ENSG00000108107	RPL28	0.474882	7.12838e-05	1	1	1
ENSG00000130005	GAMT	0.474913	6.52851e-05	1	1	1
ENSG00000131069	ACSS2	0.474963	4.43319e-05	1	1	1
ENSG00000100564	PIGH	0.475483	4.36658e-05	1	1	1
ENSG00000183011	NAA38	0.475714	5.88685e-05	1	1	1
ENSG00000259948	AC124068.1	0.476032	4.17658e-05	1	1	1
ENSG00000065057	NTHL1	0.477037	3.00374e-05	1	1	1
ENSG00000002919	SNX11	0.477054	6.5183e-05	1	1	1
ENSG00000066032	CTNNA2	0.477275	4.75423e-05	1	1	1
ENSG00000076984	MAP2K7	0.477507	5.31676e-05	1	1	1
ENSG00000269935	AC092720.2	0.477776	4.53553e-05	1	1	1
ENSG00000120322	PCDHB8	0.477784	4.55075e-05	1	1	1
ENSG00000257704	INAFM1	0.477854	3.44596e-05	1	1	1
ENSG00000147408	CSGALNACT1	0.478134	5.20471e-05	1	1	1
ENSG00000164180	TMEM161B	0.478271	4.43319e-05	1	1	1
ENSG00000178531	CTXN1	0.478465	4.9981e-05	1	1	1
ENSG00000135441	BLOC1S1	0.478557	4.36658e-05	1	1	1
ENSG00000185236	RAB11B	0.478794	7.04361e-05	1	1	1
ENSG00000117281	CD160	0.478795	5.6265e-05	1	1	1
ENSG00000149806	FAU	0.478855	5.34405e-05	1	1	1
ENSG00000135953	MFSD9	0.479281	1.60241e-05	1	1	1
ENSG00000168273	SMIM4	0.479527	5.62868e-05	1	1	1
ENSG00000262049	AC139530.1	0.479777	0.000211904	1	1	1
ENSG00000123349	PFDN5	0.479956	7.25526e-05	1	1	1
ENSG00000118194	TNNT2	0.480003	5.34405e-05	1	1	1
ENSG00000262576	PCDHGA4	0.480161	5.29334e-05	1	1	1
ENSG00000129932	DOHH	0.480248	9.30085e-05	1	1	1
ENSG00000115232	ITGA4	0.480294	5.6265e-05	1	1	1
ENSG00000105202	FBL	0.48051	6.45805e-05	1	1	1
ENSG00000156502	SUPV3L1	0.480524	4.43319e-05	1	1	1
ENSG00000215039	CD27-AS1	0.48058	1.90854e-05	1	1	1
ENSG00000267796	LIN37	0.480777	7.12838e-05	1	1	1
ENSG00000278139	AL358075.4	0.480799	6.52851e-05	1	1	1
ENSG00000164898	FMC1	0.480866	6.5183e-05	1	1	1
ENSG00000229833	PET100	0.481062	5.22336e-05	1	1	1
ENSG00000186300	ZNF555	0.481213	3.20991e-05	1	1	1
ENSG00000015475	BID	0.481438	1.60761e-05	1	1	1
ENSG00000007520	TSR3	0.481537	0.000100606	1	1	1
ENSG00000272093	ENSG00000272093	0.481551	5.88282e-05	1	1	1
ENSG00000279322	AL035252.4	0.48217	1.87614e-05	1	1	1
ENSG00000204316	MRPL38	0.48226	7.25526e-05	1	1	1
ENSG00000095752	IL11	0.482597	3.38362e-05	1	1	1
ENSG00000136942	RPL35	0.482665	6.33818e-05	1	1	1
ENSG00000203950	RTL8A	0.482745	0.00028586	1	1	1
ENSG00000077044	DGKD	0.482792	7.24663e-05	1	1	1
ENSG00000150459	SAP18	0.482915	7.25526e-05	1	1	1
ENSG00000259330	INAFM2	0.482967	7.25526e-05	1	1	1
ENSG00000217930	PAM16	0.48299	0.000113342	1	1	1
ENSG00000079462	PAFAH1B3	0.483063	3.00374e-05	1	1	1
ENSG00000114391	RPL24	0.483208	8.30896e-05	1	1	1
ENSG00000105248	CCDC94	0.483355	8.5261e-05	1	1	1
ENSG00000174775	HRAS	0.483397	4.39257e-05	1	1	1
ENSG00000153395	LPCAT1	0.483919	4.46926e-05	1	1	1
ENSG00000130751	NPAS1	0.484034	4.43319e-05	1	1	1
ENSG00000168484	SFTPC	0.484085	8.5261e-05	1	1	1
ENSG00000160218	TRAPPC10	0.484093	3.36021e-05	1	1	1
ENSG00000105357	MYH14	0.484303	0.000419821	1	1	1
ENSG00000113615	SEC24A	0.484377	5.22336e-05	1	1	1
ENSG00000140563	MCTP2	0.484767	5.47091e-05	1	1	1
ENSG00000159335	PTMS	0.48483	5.88282e-05	1	1	1
ENSG00000169976	SF3B5	0.485013	6.27525e-05	1	1	1
ENSG00000044524	EPHA3	0.485024	9.1086e-05	1	1	1
ENSG00000258660	AC006146.1	0.485282	0.00413266	1	1	1
ENSG00000130511	SSBP4	0.485497	4.36658e-05	1	1	1
ENSG00000198585	NUDT16	0.485585	6.65206e-05	1	1	1
ENSG00000163040	CCDC74A	0.486254	4.81158e-05	1	1	1
ENSG00000176101	SSNA1	0.486516	8.45012e-05	1	1	1
ENSG00000060237	WNK1	0.486684	6.96859e-05	1	1	1
ENSG00000248672	LY75-CD302	0.486763	7.12838e-05	1	1	1
ENSG00000105404	RABAC1	0.487088	0.000173905	1	1	1
ENSG00000258283	AC011603.3	0.487132	6.24033e-05	1	1	1
ENSG00000105618	PRPF31	0.487145	7.71261e-05	1	1	1
ENSG00000136908	DPM2	0.487761	0.000223418	1	1	1
ENSG00000267009	AC007780.1	0.488098	7.9104e-05	1	1	1
ENSG00000144724	PTPRG	0.488211	0.000116585	1	1	1
ENSG00000077312	SNRPA	0.488216	7.74836e-05	1	1	1
ENSG00000142937	RPS8	0.488258	0.000133815	1	1	1
ENSG00000105705	SUGP1	0.488285	4.81158e-05	1	1	1
ENSG00000152583	SPARCL1	0.488305	7.01785e-05	1	0	1
ENSG00000178821	TMEM52	0.488545	5.95509e-05	1	1	1
ENSG00000104979	C19orf53	0.488645	7.25526e-05	1	1	1
ENSG00000188186	LAMTOR4	0.488871	4.18743e-05	1	1	1
ENSG00000162734	PEA15	0.48896	3.33142e-05	1	0	1
ENSG00000147041	SYTL5	0.48898	8.06686e-05	1	1	1
ENSG00000132017	DCAF15	0.489053	9.30085e-05	1	1	1
ENSG00000205544	TMEM256	0.489305	0.000155252	1	1	1
ENSG00000266469	AC005288.1	0.48958	7.24663e-05	1	1	1
ENSG00000260342	AC138811.2	0.489675	0.000125918	1	1	1
ENSG00000237440	ZNF737	0.489713	5.50151e-05	1	1	1
ENSG00000137825	ITPKA	0.489724	7.95271e-05	1	1	1
ENSG00000182575	NXPH3	0.490027	4.17882e-05	1	1	1
ENSG00000178773	CPNE7	0.490283	6.1026e-05	1	1	1
ENSG00000141542	RAB40B	0.490424	6.52851e-05	1	1	1
ENSG00000125995	ROMO1	0.490468	5.95509e-05	1	1	1
ENSG00000183077	AFMID	0.490571	0.000127594	1	1	1
ENSG00000261732	AL031708.1	0.490592	7.37674e-05	1	1	1
ENSG00000115268	RPS15	0.490833	0.000115595	1	1	1
ENSG00000198858	R3HDM4	0.49105	7.12219e-05	1	1	1
ENSG00000130818	ZNF426	0.491122	8.36443e-05	1	1	1
ENSG00000267396	AC090236.1	0.49147	6.7311e-05	1	1	1
ENSG00000109089	CDR2L	0.491531	0.00010332	1	1	1
ENSG00000165802	NSMF	0.491546	7.14061e-05	1	1	1
ENSG00000254429	AP001972.1	0.491723	4.94125e-05	1	1	1
ENSG00000227671	AL390728.4	0.491878	7.55289e-05	1	1	1
ENSG00000101190	TCFL5	0.491934	0.000107682	1	1	1
ENSG00000100387	RBX1	0.491938	0.000107821	1	1	1
ENSG00000145592	RPL37	0.492105	5.3329e-05	1	1	1
ENSG00000157368	IL34	0.492703	7.01392e-05	1	1	1
ENSG00000108298	RPL19	0.492788	0.000137395	1	1	1
ENSG00000103528	SYT17	0.492875	0.000115467	1	1	1
ENSG00000188906	LRRK2	0.49298	0.000177726	1	1	1
ENSG00000163463	KRTCAP2	0.493093	9.2988e-05	1	1	1
ENSG00000129951	PLPPR3	0.49321	8.5261e-05	1	1	1
ENSG00000218891	ZNF579	0.493742	9.27213e-05	1	1	1
ENSG00000128805	ARHGAP22	0.493857	0.000148006	1	1	1
ENSG00000168350	DEGS2	0.494021	9.35411e-05	1	1	1
ENSG00000135390	ATP5MC2	0.494333	0.000102079	1	1	1
ENSG00000231955	AC007383.3	0.494598	0.000120209	1	1	1
ENSG00000261353	ENSG00000261353	0.494708	5.1277e-05	1	1	1
ENSG00000107902	LHPP	0.494709	0.000108778	1	1	1
ENSG00000149541	B3GAT3	0.494928	0.000172366	1	1	1
ENSG00000063177	RPL18	0.495422	0.000111932	1	1	1
ENSG00000160392	C19orf47	0.495439	0.00027105	1	1	1
ENSG00000275740	AC091959.3	0.49547	0.000137952	1	1	1
ENSG00000225174	OSTM1-AS1	0.495513	0.000148006	1	1	1
ENSG00000136052	SLC41A2	0.495704	0.000158792	1	1	1
ENSG00000267007	AC012615.2	0.495938	4.17658e-05	1	1	1
ENSG00000173327	MAP3K11	0.495955	5.84111e-05	1	1	1
ENSG00000171532	NEUROD2	0.496086	6.42701e-05	1	1	1
ENSG00000075568	TMEM131	0.496396	6.86265e-05	1	1	1
ENSG00000137857	DUOX1	0.496489	0.000148006	1	1	1
ENSG00000268613	ENSG00000268613	0.496493	0.00018821	1	1	1
ENSG00000258924	AC002094.1	0.496514	0.000253755	1	1	1
ENSG00000115935	WIPF1	0.496777	5.22336e-05	1	1	1
ENSG00000225663	MCRIP1	0.497009	0.000103467	1	1	1
ENSG00000262814	MRPL12	0.497072	0.000122398	1	1	1
ENSG00000152270	PDE3B	0.497093	5.1277e-05	1	1	1
ENSG00000097096	SYDE2	0.497126	0.000153402	1	1	1
ENSG00000188038	NRN1L	0.497196	0.00032393	1	1	1
ENSG00000235426	AL133481.1	0.497273	0.000179102	1	1	1
ENSG00000161677	JOSD2	0.497277	0.00029209	1	1	1
ENSG00000160194	NDUFV3	0.497285	0.000151577	1	1	1
ENSG00000133250	ZNF414	0.497335	0.000136929	1	1	1
ENSG00000157870	FAM213B	0.497388	0.000166675	1	1	1
ENSG00000257379	AC023509.1	0.497743	8.0694e-05	1	1	1
ENSG00000100083	GGA1	0.497954	0.000133815	1	1	1
ENSG00000267561	AC093155.3	0.497986	0.000157515	1	1	1
ENSG00000175575	PAAF1	0.498007	0.000108778	1	1	1
ENSG00000257529	RPL36A-HNRNPH2	0.498029	0.000176726	1	1	1
ENSG00000175416	CLTB	0.498053	4.94125e-05	1	1	1
ENSG00000268230	AC012313.3	0.498093	0.000142455	1	1	1
ENSG00000160190	SLC37A1	0.498268	0.000109562	1	1	1
ENSG00000095906	NUBP2	0.498372	6.52851e-05	1	1	1
ENSG00000270181	BIVM-ERCC5	0.498551	0.000275727	1	1	1
ENSG00000128487	SPECC1	0.498616	8.40141e-05	1	1	1
ENSG00000144580	CNOT9	0.498808	0.000125925	1	1	1
ENSG00000254245	PCDHGA3	0.49902	0.000200248	1	1	1
ENSG00000023902	PLEKHO1	0.499153	5.27014e-05	1	1	1
ENSG00000251369	ZNF550	0.499308	4.53553e-05	1	1	1
ENSG00000272909	AL122035.2	0.49937	0.000126676	1	1	1
ENSG00000111300	NAA25	0.499684	4.75423e-05	1	1	1
ENSG00000086504	MRPL28	0.499872	0.000191706	1	1	1
ENSG00000269987	AC004542.2	0.499993	8.96163e-05	1	1	1
ENSG00000134597	RBMX2	0.500225	0.000116585	1	1	1
ENSG00000099804	CDC34	0.500254	5.6265e-05	1	1	1
ENSG00000129911	KLF16	0.500349	7.25526e-05	1	1	1
ENSG00000243449	C4orf48	0.500368	0.000200248	1	1	1
ENSG00000197410	DCHS2	0.500416	0.000195124	1	1	1
ENSG00000162073	PAQR4	0.500436	0.000122015	1	1	1
ENSG00000175806	MSRA	0.500899	6.4366e-05	1	1	1
ENSG00000060688	SNRNP40	0.50091	0.000151711	1	1	1
ENSG00000101938	CHRDL1	0.501069	0.000148953	1	1	1
ENSG00000009724	MASP2	0.501105	0.000109562	1	1	1
ENSG00000104529	EEF1D	0.501415	0.000160254	1	1	1
ENSG00000172889	EGFL7	0.50153	6.52851e-05	1	1	1
ENSG00000231632	ENSG00000231632	0.501645	0.000230672	1	1	1
ENSG00000124614	RPS10	0.501683	0.000115467	1	1	1
ENSG00000255498	AC068385.1	0.501831	0.000213827	1	1	1
ENSG00000125266	EFNB2	0.501889	0.000319542	1	1	1
ENSG00000170214	ADRA1B	0.502136	0.000118741	1	1	1
ENSG00000135625	EGR4	0.502235	7.04361e-05	1	1	1
ENSG00000275464	FP565260.1	0.502574	0.000106816	1	0	1
ENSG00000279042	AP005242.4	0.502934	0.000139259	1	1	1
ENSG00000132718	SYT11	0.50309	0.000251473	1	1	1
ENSG00000128563	PRKRIP1	0.50311	0.000160089	1	1	1
ENSG00000143924	EML4	0.503234	5.62868e-05	1	1	1
ENSG00000214262	ANKRD36BP1	0.503428	0.000116259	1	1	1
ENSG00000125970	RALY	0.503529	0.000265613	1	1	1
ENSG00000062598	ELMO2	0.503601	7.37674e-05	1	1	1
ENSG00000105376	ICAM5	0.503873	0.0001121	1	1	1
ENSG00000095951	HIVEP1	0.504248	0.000923929	1	1	1
ENSG00000123159	GIPC1	0.504287	0.000314134	1	1	1
ENSG00000245910	SNHG6	0.504309	0.000119792	1	1	1
ENSG00000083807	SLC27A5	0.504329	0.000116585	1	1	1
ENSG00000008441	NFIX	0.504336	0.000137395	1	1	1
ENSG00000124493	GRM4	0.504351	7.47997e-05	1	1	1
ENSG00000155980	KIF5A	0.504401	0.000223132	1	0	1
ENSG00000229344	MTCO2P12	0.504546	0.000141526	1	1	1
ENSG00000003756	RBM5	0.504564	7.04361e-05	1	1	1
ENSG00000183186	C2CD4C	0.504755	0.000115467	1	1	1
ENSG00000168135	KCNJ4	0.504848	0.000126919	1	1	1
ENSG00000198933	TBKBP1	0.504898	0.000127594	1	1	1
ENSG00000151834	GABRA2	0.504948	0.000148006	1	1	1
ENSG00000184281	TSSC4	0.505114	0.000328194	1	1	1
ENSG00000179097	HTR1F	0.505255	0.000159798	1	1	1
ENSG00000101442	ACTR5	0.505343	0.000125918	1	1	1
ENSG00000103496	STX4	0.505469	0.000231373	1	1	1
ENSG00000014164	ZC3H3	0.50561	0.000187848	1	1	1
ENSG00000255686	AC073864.1	0.506167	7.65196e-05	1	1	1
ENSG00000168734	PKIG	0.506465	0.0001304	1	1	1
ENSG00000037749	MFAP3	0.506588	0.000154617	1	1	1
ENSG00000132549	VPS13B	0.506681	9.78397e-05	1	1	1
ENSG00000127554	GFER	0.507053	0.000250922	1	1	1
ENSG00000119698	PPP4R4	0.507519	0.00027105	1	1	1
ENSG00000182809	CRIP2	0.507878	0.000108778	1	1	1
ENSG00000006712	PAF1	0.507938	0.000160243	1	1	1
ENSG00000166526	ZNF3	0.508084	0.000315509	1	1	1
ENSG00000127366	TAS2R5	0.508085	0.00014987	1	1	1
ENSG00000175764	TTLL11	0.508114	0.000230991	1	1	1
ENSG00000140526	ABHD2	0.508264	0.000203197	1	1	1
ENSG00000120049	KCNIP2	0.508408	0.000231373	1	1	1
ENSG00000089597	GANAB	0.508425	8.29445e-05	1	1	1
ENSG00000164056	SPRY1	0.508525	7.24663e-05	1	1	1
ENSG00000272084	AL137127.1	0.508633	0.000182174	1	1	1
ENSG00000143643	TTC13	0.508716	7.30036e-05	1	1	1
ENSG00000127564	PKMYT1	0.508825	0.000151577	1	1	1
ENSG00000095564	BTAF1	0.508848	6.4366e-05	1	1	1
ENSG00000254122	PCDHGB7	0.508899	0.000195807	1	1	1
ENSG00000182196	ARL6IP4	0.508928	0.000356023	1	1	1
ENSG00000238057	ZEB2-AS1	0.50915	0.000172243	1	1	1
ENSG00000179526	SHARPIN	0.509258	0.000184501	1	1	1
ENSG00000234965	SHISA8	0.509469	7.30036e-05	1	1	1
ENSG00000253953	PCDHGB4	0.50958	0.000147786	1	1	1
ENSG00000161999	JMJD8	0.509592	0.000153708	1	1	1
ENSG00000198804	MT-CO1	0.509688	0.000142455	1	0	1
ENSG00000253873	PCDHGA11	0.509755	0.000124153	1	1	1
ENSG00000258199	AC073896.4	0.509778	0.000122641	1	1	1
ENSG00000112333	NR2E1	0.509796	0.000153402	1	1	1
ENSG00000239389	PCDHA13	0.509802	0.000274169	1	1	1
ENSG00000115392	FANCL	0.509817	6.1026e-05	1	1	1
ENSG00000105372	RPS19	0.509932	0.000295252	1	1	1
ENSG00000130775	THEMIS2	0.5102	0.000118039	1	1	1
ENSG00000205531	NAP1L4	0.510427	0.000252663	1	1	1
ENSG00000234741	GAS5	0.510589	0.00190443	1	1	1
ENSG00000198746	GPATCH3	0.510684	0.000580566	1	1	1
ENSG00000233542	AL391845.2	0.510711	0.000102079	1	1	1
ENSG00000204536	CCHCR1	0.511	0.000275057	1	1	1
ENSG00000164484	TMEM200A	0.511108	0.000348998	1	1	1
ENSG00000224051	CPTP	0.511153	0.000107682	1	1	1
ENSG00000115306	SPTBN1	0.511245	0.000156468	1	0	1
ENSG00000127980	PEX1	0.511314	8.02956e-05	1	1	1
ENSG00000184602	SNN	0.511407	0.000762805	1	1	1
ENSG00000196557	CACNA1H	0.511423	0.000185355	1	1	1
ENSG00000276462	BX255923.2	0.511436	0.000202832	1	1	1
ENSG00000169727	GPS1	0.51162	0.000169915	1	1	1
ENSG00000269621	AL589765.7	0.511746	0.000170873	1	1	1
ENSG00000185219	ZNF445	0.511824	0.000122015	1	1	1
ENSG00000108604	SMARCD2	0.511845	0.00028901	1	1	1
ENSG00000174521	TTC9B	0.512056	0.000125925	1	1	1
ENSG00000116584	ARHGEF2	0.512166	0.000212786	1	1	1
ENSG00000169155	ZBTB43	0.51224	0.000206414	1	1	1
ENSG00000110080	ST3GAL4	0.512263	0.000292579	1	1	1
ENSG00000127585	FBXL16	0.512358	0.00014987	1	1	1
ENSG00000170906	NDUFA3	0.512405	0.000222462	1	1	1
ENSG00000150510	FAM124A	0.512524	0.000275057	1	1	1
ENSG00000164096	C4orf3	0.512551	0.000179583	1	1	1
ENSG00000177679	SRRM3	0.512652	0.000106598	1	1	1
ENSG00000175467	SART1	0.512687	0.000345684	1	1	1
ENSG00000090971	NAT14	0.512873	7.62407e-05	1	1	1
ENSG00000132563	REEP2	0.512923	0.000145397	1	1	1
ENSG00000162191	UBXN1	0.513101	0.000500736	1	1	1
ENSG00000071462	BUD23	0.513595	0.000315509	1	1	1
ENSG00000134851	TMEM165	0.513611	0.000391781	1	1	1
ENSG00000101412	E2F1	0.513701	7.62407e-05	1	1	1
ENSG00000144713	RPL32	0.513824	0.000244665	1	1	1
ENSG00000236015	AC011290.2	0.513852	0.000148828	1	1	1
ENSG00000260941	LINC00622	0.514081	0.000293101	1	1	1
ENSG00000176956	LY6H	0.514266	0.000176726	1	1	1
ENSG00000104679	R3HCC1	0.514308	0.000220131	1	1	1
ENSG00000115286	NDUFS7	0.514451	0.000371816	1	1	1
ENSG00000177556	ATOX1	0.514538	0.000303042	1	1	1
ENSG00000179085	DPM3	0.514556	0.000119731	1	1	1
ENSG00000170558	CDH2	0.514575	0.000180649	1	1	1
ENSG00000107816	LZTS2	0.514713	0.000308369	1	1	1
ENSG00000260196	AC124798.1	0.514716	0.000107682	1	1	1
ENSG00000133103	COG6	0.514807	0.0001683	1	1	1
ENSG00000266844	AC093330.1	0.514819	0.000353094	1	1	1
ENSG00000162244	RPL29	0.51483	0.000275057	1	1	1
ENSG00000169900	PYDC1	0.514889	0.000361805	1	1	1
ENSG00000174791	RIN1	0.514906	0.00010096	1	1	1
ENSG00000280079	AC011447.7	0.514992	0.000148666	1	1	1
ENSG00000142606	MMEL1	0.515193	0.000137395	1	1	1
ENSG00000101199	ARFGAP1	0.515224	0.000108778	1	1	1
ENSG00000188167	TMPPE	0.515281	0.000230597	1	1	1
ENSG00000008083	JARID2	0.515388	0.000194242	1	1	1
ENSG00000169718	DUS1L	0.515725	0.000221381	1	1	1
ENSG00000133316	WDR74	0.515833	0.000309984	1	1	1
ENSG00000101189	MRGBP	0.516063	0.000500881	1	1	1
ENSG00000135924	DNAJB2	0.516193	0.000266781	1	1	1
ENSG00000184470	TXNRD2	0.516236	0.000195124	1	1	1
ENSG00000257386	AC025257.1	0.516284	0.000292569	1	1	1
ENSG00000066322	ELOVL1	0.516367	0.00615823	1	1	1
ENSG00000167964	RAB26	0.516538	0.000141309	1	1	1
ENSG00000255408	PCDHA3	0.516651	0.000258004	1	1	1
ENSG00000142669	SH3BGRL3	0.516657	0.000107821	1	1	1
ENSG00000276023	DUSP14	0.516742	0.00014882	1	1	1
ENSG00000239857	GET4	0.516811	0.0010057	1	1	1
ENSG00000055118	KCNH2	0.516865	7.55289e-05	1	1	1
ENSG00000246283	AC090510.1	0.516939	0.000287229	1	1	1
ENSG00000137154	RPS6	0.517172	0.000319542	1	1	1
ENSG00000089916	GPATCH2L	0.51718	0.000109562	1	1	1
ENSG00000181104	F2R	0.51723	0.000158792	1	1	1
ENSG00000131469	RPL27	0.517241	0.000209924	1	1	1
ENSG00000128185	DGCR6L	0.517265	0.000205374	1	1	1
ENSG00000001461	NIPAL3	0.517304	0.000786221	1	1	1
ENSG00000160401	CFAP157	0.517381	0.000142524	1	1	1
ENSG00000185946	RNPC3	0.517398	0.000265209	1	1	1
ENSG00000266028	SRGAP2	0.51747	0.000170873	1	1	1
ENSG00000172379	ARNT2	0.517516	0.000514031	1	1	1
ENSG00000163156	SCNM1	0.517543	0.000254621	1	1	1
ENSG00000104957	CCDC130	0.517574	0.000349243	1	1	1
ENSG00000179295	PTPN11	0.51762	0.000230597	1	1	1
ENSG00000136848	DAB2IP	0.517703	9.94098e-05	1	1	1
ENSG00000204271	SPIN3	0.517749	0.000213926	1	1	1
ENSG00000169181	GSG1L	0.51803	0.000519134	1	1	1
ENSG00000159409	CELF3	0.518058	0.000220131	1	1	1
ENSG00000102030	NAA10	0.518197	0.000366743	1	1	1
ENSG00000160741	CRTC2	0.518206	0.000346371	1	1	1
ENSG00000169087	HSPBAP1	0.518256	0.000344443	1	1	1
ENSG00000204387	C6orf48	0.518322	0.000386272	1	1	1
ENSG00000273749	CYFIP1	0.51839	0.000109562	1	1	1
ENSG00000221983	UBA52	0.518522	0.00027105	1	1	1
ENSG00000261093	AC141586.3	0.518572	0.000264393	1	1	1
ENSG00000169554	ZEB2	0.518657	0.000221381	1	1	1
ENSG00000254835	RNF185-AS1	0.518676	0.000239922	1	1	1
ENSG00000110700	RPS13	0.51952	0.00036441	1	1	1
ENSG00000149273	RPS3	0.519564	0.000385294	1	1	1
ENSG00000149016	TUT1	0.519879	0.000347893	1	1	1
ENSG00000116205	TCEANC2	0.519897	0.000213195	1	1	1
ENSG00000204392	LSM2	0.52005	0.000293101	1	1	1
ENSG00000255114	AP003392.3	0.520129	0.000153917	1	1	1
ENSG00000066629	EML1	0.520256	0.000103526	1	1	1
ENSG00000125817	CENPB	0.520266	0.000142455	1	1	1
ENSG00000121410	A1BG	0.520353	0.000356992	1	1	1
ENSG00000136856	SLC2A8	0.520411	0.000311383	1	1	1
ENSG00000090097	PCBP4	0.520412	0.000317217	1	1	1
ENSG00000114999	TTL	0.520713	0.000159504	1	1	1
ENSG00000100647	SUSD6	0.520716	0.000195124	1	1	1
ENSG00000070882	OSBPL3	0.520756	0.000251219	1	1	1
ENSG00000074696	HACD3	0.520869	0.000231373	1	1	1
ENSG00000064313	TAF2	0.521021	0.000249311	1	1	1
ENSG00000253846	PCDHGA10	0.521028	0.000249311	1	1	1
ENSG00000079435	LIPE	0.521135	0.000489415	1	1	1
ENSG00000126254	RBM42	0.521142	0.000840324	1	1	1
ENSG00000213029	SPHAR	0.521196	0.000109496	1	1	1
ENSG00000280282	AC138430.2	0.521347	0.000223418	1	0	1
ENSG00000167196	FBXO22	0.521455	0.000134244	1	1	1
ENSG00000170296	GABARAP	0.521497	0.000340153	1	1	1
ENSG00000253645	AC108863.1	0.521581	0.000388266	1	1	1
ENSG00000177189	RPS6KA3	0.521607	0.000340153	1	1	1
ENSG00000181826	RELL1	0.521681	0.0001683	1	0	1
ENSG00000259172	AC023024.1	0.521721	0.000296842	1	1	1
ENSG00000149929	HIRIP3	0.521805	0.000307077	1	1	1
ENSG00000130165	ELOF1	0.521817	0.000380082	1	1	1
ENSG00000271380	AL451085.2	0.52184	0.000171462	1	1	1
ENSG00000258824	AL122035.1	0.521975	9.50223e-05	1	1	1
ENSG00000248527	MTATP6P1	0.522111	0.000130729	1	1	1
ENSG00000136938	ANP32B	0.522309	0.000223418	1	1	1
ENSG00000254929	AL591684.2	0.522331	0.000343714	1	1	1
ENSG00000145824	CXCL14	0.522356	0.000249686	1	1	1
ENSG00000170581	STAT2	0.522375	0.000319542	1	1	1
ENSG00000197024	ZNF398	0.522494	0.000107314	1	1	1
ENSG00000262209	PCDHGB3	0.522587	0.000492521	1	1	1
ENSG00000117335	CD46	0.52265	0.000204353	1	1	1
ENSG00000173581	CCDC106	0.522723	0.000125918	1	1	1
ENSG00000143156	NME7	0.522996	0.000344501	1	1	1
ENSG00000174871	CNIH2	0.52317	0.000277892	1	1	1
ENSG00000008256	CYTH3	0.523209	0.000275991	1	1	1
ENSG00000221995	TIAF1	0.523432	0.000360269	1	1	1
ENSG00000134874	DZIP1	0.523538	0.00047635	1	1	1
ENSG00000005108	THSD7A	0.523585	0.000284435	1	1	1
ENSG00000263986	AC087393.2	0.52393	0.000405873	1	1	1
ENSG00000130731	METTL26	0.524165	0.00027023	1	1	1
ENSG00000179364	PACS2	0.524183	0.000316615	1	1	1
ENSG00000148308	GTF3C5	0.524199	0.000589847	1	1	1
ENSG00000133056	PIK3C2B	0.524303	0.000388605	1	1	1
ENSG00000184007	PTP4A2	0.524374	0.000407764	1	1	1
ENSG00000150764	DIXDC1	0.524454	0.000493733	1	1	1
ENSG00000274810	NPHP3-ACAD11	0.524502	0.000179583	1	1	1
ENSG00000107829	FBXW4	0.524512	0.00046915	1	1	1
ENSG00000161647	MPP3	0.524705	0.000197476	1	1	1
ENSG00000178445	GLDC	0.524828	0.000337199	1	1	1
ENSG00000156860	FBRS	0.524835	0.000343281	1	1	1
ENSG00000181409	AATK	0.524953	0.000364418	1	1	1
ENSG00000167645	YIF1B	0.525089	0.000149783	1	1	1
ENSG00000162992	NEUROD1	0.525137	0.000175579	1	1	1
ENSG00000272398	CD24	0.525152	0.000258004	1	1	1
ENSG00000171813	PWWP2B	0.525217	0.000277892	1	1	1
ENSG00000259946	BX005019.1	0.525439	0.000326047	1	1	1
ENSG00000176978	DPP7	0.525498	0.000314971	1	1	1
ENSG00000205155	PSENEN	0.525499	0.000108778	1	1	1
ENSG00000257923	CUX1	0.525526	0.00027251	1	1	1
ENSG00000197756	RPL37A	0.525589	0.000348414	1	1	1
ENSG00000095303	PTGS1	0.525593	0.000128779	1	1	1
ENSG00000130821	SLC6A8	0.525615	0.000371256	1	1	1
ENSG00000101246	ARFRP1	0.525695	0.000567249	1	1	1
ENSG00000164597	COG5	0.525729	0.000360269	1	1	1
ENSG00000223459	TCAF1P1	0.525756	0.000320678	1	1	1
ENSG00000116667	C1orf21	0.525855	0.000748054	1	1	1
ENSG00000249971	AC104116.1	0.525911	0.000476705	1	1	1
ENSG00000170889	RPS9	0.525925	0.00036441	1	1	1
ENSG00000280158	ENSG00000280158	0.526373	0.000352222	1	1	1
ENSG00000159884	CCDC107	0.526374	0.000279442	1	1	1
ENSG00000198938	MT-CO3	0.526685	0.000293101	1	0	1
ENSG00000139211	AMIGO2	0.526826	0.000176726	1	1	1
ENSG00000233009	NALCN-AS1	0.526882	0.000341877	1	1	1
ENSG00000112306	RPS12	0.527073	0.000465389	1	1	1
ENSG00000142676	RPL11	0.527195	0.000552035	1	1	1
ENSG00000250366	TUNAR	0.527206	0.000386272	1	1	1
ENSG00000181467	RAP2B	0.527255	0.000307166	1	1	1
ENSG00000152092	ASTN1	0.527377	0.000268961	1	1	1
ENSG00000160087	UBE2J2	0.52763	0.00094206	1	1	1
ENSG00000148296	SURF6	0.527767	0.000350695	1	1	1
ENSG00000010438	PRSS3	0.527784	0.000326784	1	1	1
ENSG00000188368	PRR19	0.527825	0.000537823	1	1	1
ENSG00000135945	REV1	0.527889	0.000204353	1	1	1
ENSG00000168214	RBPJ	0.52792	0.000398627	1	1	1
ENSG00000196544	BORCS6	0.527961	0.000316392	1	1	1
ENSG00000179909	ZNF154	0.52804	0.000183067	1	1	1
ENSG00000105254	TBCB	0.52836	0.000656989	1	1	1
ENSG00000197993	KEL	0.528406	0.00041135	1	1	1
ENSG00000161016	RPL8	0.528457	0.00047635	1	1	1
ENSG00000167996	FTH1	0.528495	0.000258004	1	0	1
ENSG00000139364	TMEM132B	0.52851	0.000553014	1	1	1
ENSG00000105926	MPP6	0.528599	0.0005065	1	1	1
ENSG00000067840	PDZD4	0.528628	0.000756695	1	1	1
ENSG00000111605	CPSF6	0.528631	0.000359721	1	1	1
ENSG00000105583	WDR83OS	0.528741	0.000141733	1	1	1
ENSG00000130734	ATG4D	0.528779	0.00045366	1	1	1
ENSG00000165338	HECTD2	0.528793	0.000659138	1	1	1
ENSG00000259863	SH3RF3-AS1	0.528899	0.00023225	1	1	1
ENSG00000276007	AC079414.3	0.528923	0.000201823	1	1	1
ENSG00000174307	PHLDA3	0.529002	0.00045524	1	1	1
ENSG00000169964	TMEM42	0.529051	0.0013702	1	1	1
ENSG00000277692	AL121583.1	0.529074	0.000414595	1	1	1
ENSG00000263843	AC022211.2	0.529094	0.000135984	1	1	1
ENSG00000107223	EDF1	0.529189	0.000667899	1	1	1
ENSG00000276995	ENSG00000276995	0.52919	0.000821257	1	1	1
ENSG00000142534	RPS11	0.529209	0.000371256	1	1	1
ENSG00000110328	GALNT18	0.529302	0.000311383	1	1	1
ENSG00000141404	GNAL	0.529372	0.000706604	1	1	1
ENSG00000112183	RBM24	0.52939	0.000411854	1	1	1
ENSG00000124251	TP53TG5	0.529456	0.000456845	1	1	1
ENSG00000182774	RPS17	0.529544	0.000447509	1	1	1
ENSG00000089053	ANAPC5	0.529614	0.000456339	1	1	1
ENSG00000260018	AC040169.1	0.5297	0.000151577	1	1	1
ENSG00000212864	RNF208	0.529894	0.00017926	1	1	1
ENSG00000171943	SRGAP2C	0.530034	0.00027105	1	1	1
ENSG00000011105	TSPAN9	0.530149	0.00027105	1	1	1
ENSG00000110717	NDUFS8	0.530183	0.000468416	1	1	1
ENSG00000077463	SIRT6	0.530192	0.000514196	1	1	1
ENSG00000163071	SPATA18	0.530324	0.000360604	1	1	1
ENSG00000224043	CCNT2-AS1	0.530349	0.000192206	1	1	1
ENSG00000184378	ACTRT3	0.53037	0.000213914	1	1	1
ENSG00000138802	SEC24B	0.53039	0.00036206	1	1	1
ENSG00000153443	UBALD1	0.53042	0.000580566	1	1	1
ENSG00000108556	CHRNE	0.530507	0.000230991	1	1	1
ENSG00000170919	TPT1-AS1	0.530607	0.000595603	1	1	1
ENSG00000040487	PQLC2	0.530609	0.000313558	1	1	1
ENSG00000225526	MKRN2OS	0.530623	0.000183067	1	1	1
ENSG00000152556	PFKM	0.530774	0.000425427	1	1	1
ENSG00000165643	SOHLH1	0.530895	0.000305571	1	1	1
ENSG00000173227	SYT12	0.530943	0.000343291	1	1	1
ENSG00000160298	C21orf58	0.530988	0.000493733	1	1	1
ENSG00000251196	AC106760.1	0.53102	0.000761352	1	1	1
ENSG00000180660	MAB21L1	0.531141	0.00021618	1	1	1
ENSG00000010626	LRRC23	0.531269	0.000505509	1	1	1
ENSG00000180884	ZNF792	0.531287	0.000252519	1	1	1
ENSG00000174137	FAM53A	0.531381	0.000645949	1	1	1
ENSG00000177156	TALDO1	0.53143	0.000476272	1	1	1
ENSG00000215217	C5orf49	0.531436	0.000223418	1	1	1
ENSG00000166398	KIAA0355	0.531471	0.000573395	1	1	1
ENSG00000266872	AC015688.7	0.531484	0.000315509	1	1	1
ENSG00000118217	ATF6	0.531606	0.000360676	1	1	1
ENSG00000279519	AC007382.1	0.531675	0.000389656	1	1	1
ENSG00000114423	CBLB	0.531747	0.000334962	1	1	1
ENSG00000106346	USP42	0.53188	0.000213195	1	1	1
ENSG00000138326	RPS24	0.531896	0.000448401	1	1	1
ENSG00000187514	PTMA	0.531975	0.000674581	1	1	1
ENSG00000182087	TMEM259	0.532073	0.000530399	1	1	1
ENSG00000107954	NEURL1	0.532377	0.000347355	1	1	1
ENSG00000160781	PAQR6	0.532424	0.000395042	1	1	1
ENSG00000172301	COPRS	0.532426	0.000182912	1	1	1
ENSG00000198382	UVRAG	0.532454	0.000213827	1	1	1
ENSG00000073169	SELENOO	0.53263	0.000360269	1	1	1
ENSG00000271782	ENSG00000271782	0.532655	0.000222782	1	1	1
ENSG00000268069	AC004466.1	0.532655	0.000603265	1	1	1
ENSG00000076641	PAG1	0.532753	0.000222462	1	1	1
ENSG00000279232	AC008522.1	0.532837	0.00135355	1	1	1
ENSG00000269906	AL606834.1	0.532839	0.000537155	1	1	1
ENSG00000179399	GPC5	0.532847	0.00100523	1	1	1
ENSG00000168137	SETD5	0.532871	0.000213195	1	1	1
ENSG00000130255	RPL36	0.533099	0.000377957	1	1	1
ENSG00000123612	ACVR1C	0.533123	0.000230597	1	1	1
ENSG00000125170	DOK4	0.533151	0.000231909	1	1	1
ENSG00000260025	AC009414.2	0.533285	0.000234395	1	1	1
ENSG00000115042	FAHD2A	0.533301	0.00117243	1	1	1
ENSG00000118495	PLAGL1	0.533313	0.000258004	1	1	1
ENSG00000176485	PLA2G16	0.533359	0.000549918	1	1	1
ENSG00000183722	LHFPL6	0.53338	0.000212786	1	1	1
ENSG00000198883	PNMA5	0.533497	0.000627758	1	1	1
ENSG00000125846	ZNF133	0.533589	0.000411102	1	1	1
ENSG00000172461	FUT9	0.533628	0.000832509	1	1	1
ENSG00000186566	GPATCH8	0.533726	0.000255971	1	1	1
ENSG00000105983	LMBR1	0.533783	0.000519134	1	1	1
ENSG00000196470	SIAH1	0.533795	0.000469347	1	1	1
ENSG00000273420	AC008738.7	0.533881	0.000252519	1	1	1
ENSG00000184144	CNTN2	0.533902	0.00063974	1	1	1
ENSG00000076826	CAMSAP3	0.533924	0.000326506	1	1	1
ENSG00000103254	FAM173A	0.533979	0.000364418	1	1	1
ENSG00000111727	HCFC2	0.533982	0.000212786	1	1	1
ENSG00000172346	CSDC2	0.534146	0.000212631	1	1	1
ENSG00000189144	ZNF573	0.534186	0.000576237	1	1	1
ENSG00000170340	B3GNT2	0.534225	0.000361342	1	1	1
ENSG00000145494	NDUFS6	0.534636	0.00133877	1	1	1
ENSG00000139899	CBLN3	0.534637	0.000446367	1	1	1
ENSG00000024048	UBR2	0.534657	0.000170873	1	1	1
ENSG00000103145	HCFC1R1	0.534754	0.000419821	1	1	1
ENSG00000260878	AC104072.1	0.534821	0.000461484	1	1	1
ENSG00000197128	ZNF772	0.534862	0.00041938	1	1	1
ENSG00000226852	ENSG00000226852	0.534979	0.00113376	1	1	1
ENSG00000132612	VPS4A	0.534986	0.000613351	1	1	1
ENSG00000183291	SELENOF	0.535035	0.000311383	1	1	1
ENSG00000083845	RPS5	0.53508	0.000576955	1	1	1
ENSG00000025800	KPNA6	0.53508	0.000347355	1	1	1
ENSG00000124155	PIGT	0.535147	0.000182174	1	1	1
ENSG00000146360	GPR6	0.535193	0.000721437	1	1	1
ENSG00000135519	KCNH3	0.535286	0.000347355	1	1	1
ENSG00000169427	KCNK9	0.535397	0.000300635	1	1	1
ENSG00000280071	FP565260.6	0.535401	0.000428049	1	1	1
ENSG00000174574	AKIRIN1	0.535511	0.000256935	1	1	1
ENSG00000163872	YEATS2	0.535609	0.000275057	1	1	1
ENSG00000139624	CERS5	0.535832	0.000463823	1	1	1
ENSG00000033327	GAB2	0.535855	0.000505509	1	1	1
ENSG00000177707	NECTIN3	0.535874	0.000434245	1	1	1
ENSG00000253729	PRKDC	0.535899	0.00024481	1	1	1
ENSG00000155761	SPAG17	0.536006	0.000421421	1	1	1
ENSG00000157212	PAXIP1	0.536007	0.000364547	1	1	1
ENSG00000065600	TMEM206	0.536032	0.000458252	1	1	1
ENSG00000279500	AC108704.2	0.53609	0.000558835	1	1	1
ENSG00000183444	OR7E38P	0.53618	0.000249311	1	1	1
ENSG00000160917	CPSF4	0.536275	0.000326047	1	1	1
ENSG00000156482	RPL30	0.536451	0.000747527	1	1	1
ENSG00000131187	F12	0.536497	0.000505509	1	1	1
ENSG00000011478	QPCTL	0.536524	0.000256122	1	1	1
ENSG00000162747	FCGR3B	0.536554	0.000741353	1	0	1
ENSG00000122406	RPL5	0.536674	0.000416907	1	1	1
ENSG00000185127	C6orf120	0.536742	0.000511718	1	1	1
ENSG00000169180	XPO6	0.536762	0.000414595	1	1	1
ENSG00000214425	LRRC37A4P	0.536808	0.00036441	1	1	1
ENSG00000257550	AC023509.2	0.536817	0.000234395	1	1	1
ENSG00000114251	WNT5A	0.536856	0.000476705	1	1	1
ENSG00000100211	CBY1	0.536889	0.000700066	1	1	1
ENSG00000148291	SURF2	0.53692	0.000907573	1	1	1
ENSG00000099795	NDUFB7	0.53696	0.000756558	1	1	1
ENSG00000188486	H2AFX	0.537022	0.000465531	1	1	1
ENSG00000211459	MT-RNR1	0.537042	0.00108858	1	0	1
ENSG00000267466	AC021683.1	0.537074	0.000489415	1	1	1
ENSG00000130724	CHMP2A	0.537094	0.000479344	1	1	1
ENSG00000007264	MATK	0.537151	0.000371256	1	1	1
ENSG00000163788	SNRK	0.53723	0.000391732	1	1	1
ENSG00000149932	TMEM219	0.537271	0.00045366	1	1	1
ENSG00000145808	ADAMTS19	0.537296	0.00045366	1	1	1
ENSG00000083817	ZNF416	0.537363	0.000191706	1	1	1
ENSG00000241990	PRR34-AS1	0.537583	0.00165157	1	1	1
ENSG00000179520	SLC17A8	0.53764	0.000592598	1	1	1
ENSG00000277258	PCGF2	0.537641	0.000179583	1	1	1
ENSG00000104419	NDRG1	0.537702	0.000797846	1	1	1
ENSG00000145075	CCDC39	0.537719	0.00132229	1	1	1
ENSG00000035664	DAPK2	0.537727	0.000759696	1	1	1
ENSG00000183248	PRR36	0.537745	0.000617002	1	1	1
ENSG00000137818	RPLP1	0.537824	0.000715624	1	1	1
ENSG00000204044	SLC12A5-AS1	0.537953	0.000434716	1	1	1
ENSG00000259168	AC104002.3	0.537962	0.000539409	1	1	1
ENSG00000120594	PLXDC2	0.538002	0.000258004	1	1	1
ENSG00000198712	MT-CO2	0.538057	0.000764036	1	0	1
ENSG00000273637	AL139260.2	0.538094	0.000460163	1	1	1
ENSG00000125755	SYMPK	0.538161	0.000721841	1	1	1
ENSG00000099849	RASSF7	0.538178	0.000194456	1	1	1
ENSG00000275088	AC026469.1	0.538494	0.000257594	1	1	1
ENSG00000196814	MVB12B	0.538527	0.000454635	1	1	1
ENSG00000259661	AC068831.4	0.538538	0.0010022	1	1	1
ENSG00000131116	ZNF428	0.538592	0.000627064	1	1	1
ENSG00000170234	PWWP2A	0.53864	0.00103026	1	1	1
ENSG00000119559	C19orf25	0.538656	0.00114467	1	1	1
ENSG00000166145	SPINT1	0.538657	0.000275057	1	1	1
ENSG00000168096	ANKS3	0.538701	0.000573395	1	1	1
ENSG00000205542	TMSB4X	0.538757	0.000573395	1	1	1
ENSG00000159753	CARMIL2	0.538872	0.00047514	1	1	1
ENSG00000133401	PDZD2	0.539093	0.000454286	1	1	1
ENSG00000142949	PTPRF	0.539178	0.000364418	1	1	1
ENSG00000181085	MAPK15	0.539205	0.000223418	1	1	1
ENSG00000134899	ERCC5	0.539252	0.000410794	1	1	1
ENSG00000169136	ATF5	0.53935	0.000512484	1	1	1
ENSG00000180739	S1PR5	0.539422	0.000213195	1	1	1
ENSG00000138617	PARP16	0.539449	0.000360269	1	1	1
ENSG00000129933	MAU2	0.539479	0.00053007	1	1	1
ENSG00000278948	AL031587.5	0.539571	0.00108591	1	1	1
ENSG00000131831	RAI2	0.539674	0.000476705	1	1	1
ENSG00000273188	AL022328.3	0.539688	0.000277892	1	1	1
ENSG00000181690	PLAG1	0.539782	0.000250922	1	1	1
ENSG00000135702	CHST5	0.539831	0.000410794	1	1	1
ENSG00000236859	NIFK-AS1	0.539928	0.000613351	1	1	1
ENSG00000186714	CCDC73	0.539966	0.000343291	1	1	1
ENSG00000267448	AC010649.1	0.539979	0.000445422	1	1	1
ENSG00000129515	SNX6	0.540101	0.000571074	1	1	1
ENSG00000146963	LUC7L2	0.54011	0.000607319	1	1	1
ENSG00000118922	KLF12	0.540193	0.000882819	1	1	1
ENSG00000134825	TMEM258	0.540222	0.00209712	1	1	1
ENSG00000134419	RPS15A	0.54026	0.000715005	1	1	1
ENSG00000134086	VHL	0.540278	0.000448401	1	1	1
ENSG00000139508	SLC46A3	0.540289	0.000250922	1	1	1
ENSG00000102103	PQBP1	0.540332	0.000656989	1	1	1
ENSG00000260465	AC018557.1	0.540502	0.000608212	1	1	1
ENSG00000131408	NR1H2	0.540592	0.00041725	1	1	1
ENSG00000116809	ZBTB17	0.54062	0.000741781	1	1	1
ENSG00000196547	MAN2A2	0.54078	0.00041135	1	1	1
ENSG00000215472	RPL17-C18orf32	0.540851	0.000425427	1	1	1
ENSG00000205220	PSMB10	0.54088	0.000476705	1	1	1
ENSG00000108469	RECQL5	0.540922	0.000476705	1	1	1
ENSG00000279456	AL353763.1	0.540951	0.000519134	1	1	1
ENSG00000138207	RBP4	0.540965	0.000542533	1	1	1
ENSG00000169989	TIGD4	0.541022	0.000580566	1	1	1
ENSG00000142765	SYTL1	0.541125	0.000425691	1	1	1
ENSG00000135299	ANKRD6	0.541192	0.000704365	1	1	1
ENSG00000177479	ARIH2	0.54123	0.00100846	1	1	1
ENSG00000134686	PHC2	0.541237	0.000624425	1	1	1
ENSG00000139971	C14orf37	0.54131	0.00117243	1	1	1
ENSG00000256364	AC069234.2	0.541332	0.000549918	1	1	1
ENSG00000105640	RPL18A	0.541354	0.000859664	1	1	1
ENSG00000149923	PPP4C	0.541356	0.000602218	1	1	1
ENSG00000109971	HSPA8	0.541479	0.00122934	1	1	1
ENSG00000146066	HIGD2A	0.541551	0.000311299	1	1	1
ENSG00000236051	MYCBP2-AS1	0.541745	0.000230856	1	1	1
ENSG00000154146	NRGN	0.541746	0.000545149	1	1	1
ENSG00000256966	AL513165.2	0.541772	0.000515039	1	1	1
ENSG00000054967	RELT	0.541828	0.000649699	1	1	1
ENSG00000259357	AL590133.2	0.541876	0.00114218	1	1	1
ENSG00000160993	ALKBH4	0.541916	0.000380082	1	1	1
ENSG00000278765	AC004477.3	0.541957	0.00297467	1	1	1
ENSG00000158292	GPR153	0.541994	0.000391781	1	1	1
ENSG00000126822	PLEKHG3	0.54202	0.0010548	1	1	1
ENSG00000184897	H1FX	0.542249	0.000595603	1	1	1
ENSG00000116251	RPL22	0.542255	0.00060886	1	1	1
ENSG00000198874	TYW1	0.542298	0.00113	1	1	1
ENSG00000171357	LURAP1	0.54232	0.000833449	1	1	1
ENSG00000105967	TFEC	0.542432	0.000656989	1	1	1
ENSG00000182771	GRID1	0.542441	0.000346371	1	1	1
ENSG00000124177	CHD6	0.542545	0.000428049	1	1	1
ENSG00000178695	KCTD12	0.542583	0.000371256	1	1	1
ENSG00000198918	RPL39	0.542587	0.000917919	1	1	1
ENSG00000150667	FSIP1	0.542617	0.000770211	1	1	1
ENSG00000167657	DAPK3	0.542632	0.00122934	1	1	1
ENSG00000131653	TRAF7	0.542661	0.00027105	1	1	1
ENSG00000091831	ESR1	0.542697	0.000530399	1	1	1
ENSG00000174839	DENND6A	0.542698	0.000446367	1	1	1
ENSG00000170017	ALCAM	0.542731	0.000246802	1	1	1
ENSG00000143947	RPS27A	0.542765	0.000801414	1	1	1
ENSG00000197971	MBP	0.542797	0.000672055	1	0	1
ENSG00000204237	OXLD1	0.542911	0.00135355	1	1	1
ENSG00000159023	EPB41	0.542967	0.000525233	1	1	1
ENSG00000169249	ZRSR2	0.543067	0.000407796	1	1	1
ENSG00000278897	AC020951.1	0.543128	0.000501463	1	1	1
ENSG00000172428	COPS9	0.543194	0.000456845	1	1	1
ENSG00000198742	SMURF1	0.543212	0.000252519	1	1	1
ENSG00000216921	AC131097.2	0.543264	0.00078037	1	1	1
ENSG00000196187	TMEM63A	0.543298	0.00106219	1	1	1
ENSG00000214944	ARHGEF28	0.543438	0.00104167	1	1	1
ENSG00000269190	FBXO17	0.543565	0.000386272	1	1	1
ENSG00000106066	CPVL	0.543613	0.000364547	1	1	1
ENSG00000196730	DAPK1	0.543619	0.00286839	1	1	1
ENSG00000108669	CYTH1	0.543667	0.000753048	1	1	1
ENSG00000082014	SMARCD3	0.543692	0.000269521	1	1	1
ENSG00000261884	AC040162.1	0.543859	0.000412882	1	1	1
ENSG00000105193	RPS16	0.544044	0.000999309	1	1	1
ENSG00000204217	BMPR2	0.544052	0.00104389	1	1	1
ENSG00000272240	AC004908.1	0.544188	0.000594722	1	1	1
ENSG00000136819	C9orf78	0.544232	0.00243661	1	1	1
ENSG00000166166	TRMT61A	0.54424	0.000927206	1	1	1
ENSG00000163794	UCN	0.544288	0.00213561	1	1	1
ENSG00000131495	NDUFA2	0.544311	0.000876445	1	1	1
ENSG00000198835	GJC2	0.544442	0.00146681	1	1	1
ENSG00000100147	CCDC134	0.54449	0.000385294	1	1	1
ENSG00000269495	AC011483.2	0.544614	0.000416907	1	1	1
ENSG00000158966	CACHD1	0.544625	0.0003512	1	1	1
ENSG00000159140	SON	0.544648	0.000341877	1	1	1
ENSG00000167515	TRAPPC2L	0.544768	0.0009185	1	1	1
ENSG00000279331	RBM12B-AS1	0.544931	0.00047635	1	1	1
ENSG00000115808	STRN	0.544941	0.000616548	1	1	1
ENSG00000134775	FHOD3	0.545002	0.000613351	1	1	1
ENSG00000108639	SYNGR2	0.54501	0.00177686	1	1	1
ENSG00000226245	ZNF32-AS1	0.545052	0.000410794	1	1	1
ENSG00000149577	SIDT2	0.545078	0.000465389	1	1	1
ENSG00000134369	NAV1	0.545146	0.000237221	1	1	1
ENSG00000040608	RTN4R	0.545201	0.000624392	1	1	1
ENSG00000143862	ARL8A	0.545284	0.000815483	1	1	1
ENSG00000198574	SH2D1B	0.545307	0.000746675	1	0	1
ENSG00000103266	STUB1	0.545396	0.000317217	1	1	1
ENSG00000196535	MYO18A	0.545422	0.000754549	1	1	1
ENSG00000152082	MZT2B	0.545425	0.000319542	1	1	1
ENSG00000198225	FKBP1C	0.545432	0.000476272	1	1	1
ENSG00000172469	MANEA	0.545498	0.000448401	1	1	1
ENSG00000109475	RPL34	0.54553	0.00169266	1	1	1
ENSG00000118094	TREH	0.54554	0.00080575	1	1	1
ENSG00000188215	DCUN1D3	0.545564	0.000700066	1	1	1
ENSG00000253305	PCDHGB6	0.545565	0.000553014	1	1	1
ENSG00000169499	PLEKHA2	0.545595	0.000714519	1	1	1
ENSG00000076321	KLHL20	0.54561	0.000380082	1	1	1
ENSG00000163888	CAMK2N2	0.54576	0.000619387	1	1	1
ENSG00000166949	SMAD3	0.545781	0.000753965	1	1	1
ENSG00000052126	PLEKHA5	0.545789	0.000566076	1	1	1
ENSG00000280143	AP000892.3	0.545816	0.000564563	1	1	1
ENSG00000135486	HNRNPA1	0.545834	0.000687833	1	1	1
ENSG00000133519	ZDHHC8P1	0.545843	0.000353111	1	1	1
ENSG00000198879	SFMBT2	0.545859	0.00027251	1	1	1
ENSG00000228989	ENSG00000228989	0.545933	0.000622055	1	1	1
ENSG00000074071	MRPS34	0.545979	0.00139349	1	1	1
ENSG00000121104	FAM117A	0.546116	0.000326506	1	1	1
ENSG00000108523	RNF167	0.546409	0.000383603	1	1	1
ENSG00000129534	MIS18BP1	0.546437	0.000533111	1	1	1
ENSG00000159459	UBR1	0.54651	0.000576641	1	1	1
ENSG00000100263	RHBDD3	0.546735	0.000832509	1	1	1
ENSG00000145817	YIPF5	0.546802	0.000503359	1	1	1
ENSG00000002330	BAD	0.546835	0.000552035	1	1	1
ENSG00000117602	RCAN3	0.546836	0.000783991	1	1	1
ENSG00000123144	TRIR	0.546877	0.000764947	1	1	1
ENSG00000075914	EXOSC7	0.547127	0.00139122	1	1	1
ENSG00000259607	AC108449.3	0.547157	0.00102644	1	1	1
ENSG00000101470	TNNC2	0.547197	0.000448401	1	1	1
ENSG00000183111	ARHGEF37	0.547354	0.00124587	1	1	1
ENSG00000105851	PIK3CG	0.547368	0.00122853	1	1	1
ENSG00000154655	L3MBTL4	0.547456	0.000382744	1	1	1
ENSG00000185551	NR2F2	0.547519	0.00121733	1	1	1
ENSG00000142541	RPL13A	0.54757	0.000850573	1	1	1
ENSG00000134072	CAMK1	0.547572	0.00104167	1	1	1
ENSG00000230445	LRRC37A6P	0.547852	0.000741781	1	1	1
ENSG00000100410	PHF5A	0.547944	0.000498509	1	1	1
ENSG00000198205	ZXDA	0.547957	0.00060886	1	1	1
ENSG00000140988	RPS2	0.548011	0.000942558	1	1	1
ENSG00000083814	ZNF671	0.548058	0.000507097	1	1	1
ENSG00000244274	DBNDD2	0.548074	0.000617002	1	1	1
ENSG00000091490	SEL1L3	0.548207	0.00029652	1	1	1
ENSG00000124374	PAIP2B	0.548339	0.00115217	1	1	1
ENSG00000161681	SHANK1	0.548392	0.000722904	1	1	1
ENSG00000162670	BRINP3	0.548523	0.000821246	1	1	1
ENSG00000135638	EMX1	0.548699	0.000595603	1	1	1
ENSG00000147403	RPL10	0.54891	0.00149372	1	1	1
ENSG00000146414	SHPRH	0.548924	0.00030005	1	1	1
ENSG00000185133	INPP5J	0.548937	0.000418059	1	1	1
ENSG00000228492	RAB11FIP1P1	0.54897	0.000613351	1	1	1
ENSG00000155265	GOLGA7B	0.548991	0.000407796	1	1	1
ENSG00000174915	PTDSS2	0.548992	0.00107335	1	1	1
ENSG00000197785	ATAD3A	0.549044	0.000757811	1	1	1
ENSG00000168748	CA7	0.549064	0.00060886	1	1	1
ENSG00000269711	AC008763.3	0.549069	0.000463607	1	1	1
ENSG00000070808	CAMK2A	0.549116	0.000641128	1	1	1
ENSG00000189420	ZFP92	0.549167	0.00127258	1	1	1
ENSG00000103966	EHD4	0.549172	0.000741781	1	1	1
ENSG00000159692	CTBP1	0.549172	0.00107262	1	1	1
ENSG00000232630	PRPS1P2	0.549313	0.000882111	1	0	1
ENSG00000116863	ADPRHL2	0.549318	0.000582643	1	1	1
ENSG00000116652	DLEU2L	0.54933	0.00161161	1	1	1
ENSG00000179902	C1orf194	0.549342	0.000351672	1	1	1
ENSG00000107957	SH3PXD2A	0.549358	0.000738233	1	1	1
ENSG00000128578	STRIP2	0.549416	0.000921283	1	1	1
ENSG00000164081	TEX264	0.549455	0.000922407	1	1	1
ENSG00000116544	DLGAP3	0.549558	0.000549918	1	1	1
ENSG00000159210	SNF8	0.549588	0.00127303	1	1	1
ENSG00000266338	NBPF15	0.549742	0.000501245	1	1	1
ENSG00000279970	AC023024.2	0.549835	0.00157847	1	1	1
ENSG00000186577	SMIM29	0.549912	0.000538504	1	1	1
ENSG00000173338	KCNK7	0.549917	0.00137332	1	1	1
ENSG00000116747	TROVE2	0.549926	0.000381212	1	1	1
ENSG00000101213	PTK6	0.549933	0.00111784	1	1	1
ENSG00000198763	MT-ND2	0.550005	0.00223516	1	0	1
ENSG00000112624	BICRAL	0.550042	0.00041135	1	1	1
ENSG00000272821	U62317.3	0.550079	0.00104457	1	1	1
ENSG00000187239	FNBP1	0.550089	0.000753387	1	1	1
ENSG00000109046	WSB1	0.550106	0.000351672	1	1	1
ENSG00000003393	ALS2	0.550114	0.000770038	1	1	1
ENSG00000279668	AC024610.2	0.550115	0.000411854	1	1	1
ENSG00000105767	CADM4	0.550235	0.00729465	1	1	1
ENSG00000263001	GTF2I	0.550241	0.00108271	1	1	1
ENSG00000165521	EML5	0.550245	0.000435587	1	1	1
ENSG00000182870	GALNT9	0.550266	0.000645949	1	1	1
ENSG00000141569	TRIM65	0.550357	0.000932688	1	1	1
ENSG00000232940	HCG25	0.550385	0.000706604	1	1	1
ENSG00000129757	CDKN1C	0.550399	0.00090944	1	1	1
ENSG00000145431	PDGFC	0.550418	0.000343291	1	1	1
ENSG00000238276	AL354863.1	0.550429	0.00125756	1	1	1
ENSG00000070501	POLB	0.550448	0.000616548	1	1	1
ENSG00000251660	AC007036.3	0.55049	0.000989826	1	1	1
ENSG00000212670	ENSG00000212670	0.550526	0.00094206	1	1	1
ENSG00000166596	CFAP52	0.550532	0.000786105	1	1	1
ENSG00000185129	PURA	0.55055	0.000358917	1	1	1
ENSG00000083896	YTHDC1	0.550846	0.000542533	1	1	1
ENSG00000248540	AC010931.2	0.550901	0.0016944	1	0	1
ENSG00000180354	MTURN	0.551008	0.000651554	1	1	1
ENSG00000266820	KPNA2P3	0.551271	0.000553472	1	1	1
ENSG00000151498	ACAD8	0.551315	0.000465531	1	1	1
ENSG00000102387	TAF7L	0.551365	0.000840468	1	1	1
ENSG00000160961	ZNF333	0.551425	0.00141434	1	1	1
ENSG00000129993	CBFA2T3	0.551495	0.00036441	1	1	1
ENSG00000181350	LRRC75A	0.551533	0.000335735	1	1	1
ENSG00000177105	RHOG	0.551554	0.00133877	1	1	1
ENSG00000078804	TP53INP2	0.551629	0.000927206	1	1	1
ENSG00000259164	AC007375.2	0.551677	0.00120268	1	1	1
ENSG00000197714	ZNF460	0.551722	0.000456339	1	1	1
ENSG00000254198	AC113191.1	0.55176	0.000882819	1	1	1
ENSG00000164112	TMEM155	0.5518	0.000882819	1	0	1
ENSG00000245937	LINC01184	0.551806	0.000842187	1	1	1
ENSG00000136274	NACAD	0.551892	0.000804665	1	1	1
ENSG00000269908	ENSG00000269908	0.551937	0.000500881	1	1	1
ENSG00000109956	B3GAT1	0.551982	0.000424038	1	1	1
ENSG00000179796	LRRC3B	0.552026	0.000348414	1	1	1
ENSG00000139438	FAM222A	0.552044	0.000821246	1	1	1
ENSG00000223891	OSER1-AS1	0.552063	0.000680133	1	1	1
ENSG00000086200	IPO11	0.55214	0.000683181	1	1	1
ENSG00000168702	LRP1B	0.552157	0.00208602	1	1	1
ENSG00000163870	TPRA1	0.552338	0.000942558	1	1	1
ENSG00000120942	UBIAD1	0.552487	0.000395042	1	1	1
ENSG00000112561	TFEB	0.552555	0.00137195	1	1	1
ENSG00000173542	MOB1B	0.55259	0.000411854	1	1	1
ENSG00000270898	GPR75-ASB3	0.552753	0.00159185	1	1	1
ENSG00000272921	AC005832.4	0.552798	0.000978956	1	1	1
ENSG00000099250	NRP1	0.552892	0.000668684	1	1	1
ENSG00000126756	UXT	0.552892	0.00157991	1	1	1
ENSG00000177463	NR2C2	0.552896	0.000371816	1	1	1
ENSG00000134533	RERG	0.552923	0.000637146	1	1	1
ENSG00000279689	AC022400.8	0.55294	0.00124587	1	1	1
ENSG00000043591	ADRB1	0.552974	0.000927655	1	1	1
ENSG00000236528	AL033528.2	0.55309	0.0010693	1	0	1
ENSG00000162706	CADM3	0.553097	0.00104457	1	1	1
ENSG00000234390	USP27X-AS1	0.553167	0.00104389	1	1	1
ENSG00000278811	LINC00624	0.553186	0.000722238	1	1	1
ENSG00000158552	ZFAND2B	0.553204	0.000710145	1	1	1
ENSG00000139292	LGR5	0.55328	0.00105599	1	1	1
ENSG00000235118	FAM237A	0.553334	0.00118561	1	0	1
ENSG00000224870	AL391244.1	0.553417	0.00336249	1	1	1
ENSG00000233621	LINC01137	0.553567	0.000358917	1	1	1
ENSG00000004455	AK2	0.553594	0.00125931	1	1	1
ENSG00000019549	SNAI2	0.553618	0.000622055	1	1	1
ENSG00000278722	AL445288.1	0.553769	0.00094206	1	1	1
ENSG00000136305	CIDEB	0.553864	0.000627394	1	1	1
ENSG00000125966	MMP24	0.553868	0.00047635	1	1	1
ENSG00000203778	FAM229B	0.553903	0.00100293	1	1	1
ENSG00000106948	AKNA	0.553914	0.000500881	1	1	1
ENSG00000185164	NOMO2	0.554047	0.000741781	1	1	1
ENSG00000198108	CHSY3	0.554056	0.00118503	1	1	1
ENSG00000049130	KITLG	0.554062	0.00124816	1	1	1
ENSG00000136381	IREB2	0.554065	0.000786221	1	1	1
ENSG00000213523	SRA1	0.554106	0.00133354	1	1	1
ENSG00000041988	THAP3	0.554116	0.00126853	1	1	1
ENSG00000266642	AC024267.6	0.554121	0.000840324	1	1	1
ENSG00000050767	COL23A1	0.554153	0.000832509	1	1	1
ENSG00000267436	AC005786.3	0.554184	0.00113	1	1	1
ENSG00000103365	GGA2	0.554256	0.000656989	1	1	1
ENSG00000174444	RPL4	0.554338	0.000680133	1	1	1
ENSG00000007080	CCDC124	0.554383	0.0015662	1	1	1
ENSG00000127831	VIL1	0.554409	0.00078037	1	1	1
ENSG00000256206	AC018523.2	0.55449	0.00144257	1	1	1
ENSG00000105327	BBC3	0.554498	0.000378561	1	1	1
ENSG00000248441	LINC01197	0.554599	0.00105135	1	1	1
ENSG00000090686	USP48	0.554626	0.00119371	1	1	1
ENSG00000186642	PDE2A	0.554641	0.00108858	1	1	1
ENSG00000163082	SGPP2	0.554667	0.00106089	1	1	1
ENSG00000130811	EIF3G	0.554689	0.00183958	1	1	1
ENSG00000172345	STARD5	0.554704	0.000832509	1	1	1
ENSG00000103024	NME3	0.554779	0.00122541	1	1	1
ENSG00000185347	TEDC1	0.554829	0.00115056	1	1	1
ENSG00000204172	AGAP9	0.554899	0.00121491	1	1	1
ENSG00000108654	DDX5	0.554911	0.000504962	1	1	1
ENSG00000279592	AC010653.2	0.554933	0.000700326	1	1	1
ENSG00000248333	CDK11B	0.554996	0.00127303	1	1	1
ENSG00000178028	DMAP1	0.55501	0.00100633	1	1	1
ENSG00000272772	AC104109.3	0.555039	0.00337338	1	1	1
ENSG00000174951	FUT1	0.555043	0.000895852	1	1	1
ENSG00000108231	LGI1	0.555119	0.000756558	1	1	1
ENSG00000262967	AC005921.2	0.55517	0.00101195	1	1	1
ENSG00000117036	ETV3	0.555205	0.000815223	1	1	1
ENSG00000266412	NCOA4	0.5553	0.000707017	1	1	1
ENSG00000174740	PABPC5	0.555334	0.00036441	1	1	1
ENSG00000119321	FKBP15	0.555359	0.0014713	1	1	1
ENSG00000105617	LENG1	0.555367	0.000821246	1	1	1
ENSG00000104907	TRMT1	0.555397	0.00109878	1	1	1
ENSG00000149798	CDC42EP2	0.555406	0.000951479	1	1	1
ENSG00000123384	LRP1	0.555431	0.000656989	1	1	1
ENSG00000115760	BIRC6	0.555434	0.000410794	1	1	1
ENSG00000214140	PRCD	0.555457	0.00140614	1	1	1
ENSG00000129968	ABHD17A	0.555465	0.000756558	1	1	1
ENSG00000253854	AC010834.3	0.555591	0.00114068	1	1	1
ENSG00000157193	LRP8	0.555706	0.00125257	1	1	1
ENSG00000168917	SLC35G2	0.555751	0.00119452	1	1	1
ENSG00000103269	RHBDL1	0.555862	0.000553489	1	1	1
ENSG00000185813	PCYT2	0.555868	0.0037218	1	1	1
ENSG00000123353	ORMDL2	0.555899	0.000553345	1	1	1
ENSG00000185298	CCDC137	0.556008	0.0015605	1	1	1
ENSG00000141298	SSH2	0.556015	0.000998125	1	1	1
ENSG00000261553	AL137782.1	0.556061	0.000695308	1	1	1
ENSG00000184436	THAP7	0.556119	0.00164626	1	1	1
ENSG00000185100	ADSSL1	0.55622	0.00095276	1	1	1
ENSG00000213465	ARL2	0.556324	0.00131341	1	1	1
ENSG00000198369	SPRED2	0.556389	0.00126805	1	1	1
ENSG00000179456	ZBTB18	0.556451	0.000388266	1	1	1
ENSG00000168646	AXIN2	0.556563	0.00112649	1	1	1
ENSG00000140264	SERF2	0.556574	0.00159017	1	1	1
ENSG00000101333	PLCB4	0.556575	0.000576641	1	1	1
ENSG00000213199	ASIC3	0.55661	0.0014713	1	1	1
ENSG00000162585	FAAP20	0.556615	0.000839146	1	1	1
ENSG00000153823	PID1	0.556615	0.000418059	1	1	1
ENSG00000081041	CXCL2	0.556629	0.00060886	1	1	1
ENSG00000197702	PARVA	0.55669	0.00106708	1	1	1
ENSG00000090238	YPEL3	0.556704	0.0015662	1	1	1
ENSG00000005884	ITGA3	0.556716	0.000620457	1	1	1
ENSG00000179292	TMEM151A	0.556806	0.00036441	1	1	1
ENSG00000260482	AC008870.1	0.55682	0.00046752	1	1	1
ENSG00000125912	NCLN	0.55684	0.00167133	1	1	1
ENSG00000164128	NPY1R	0.55684	0.00125451	1	1	1
ENSG00000261236	BOP1	0.55684	0.000608212	1	1	1
ENSG00000053372	MRTO4	0.55687	0.000832509	1	1	1
ENSG00000197180	AC244090.1	0.556886	0.000698395	1	1	1
ENSG00000107338	SHB	0.556896	0.000515039	1	1	1
ENSG00000179403	VWA1	0.556915	0.0016657	1	1	1
ENSG00000276075	AC027682.6	0.556957	0.00060886	1	1	1
ENSG00000106263	EIF3B	0.557007	0.00236472	1	1	1
ENSG00000148120	C9orf3	0.557238	0.00182465	1	1	1
ENSG00000112679	DUSP22	0.557262	0.000624392	1	1	1
ENSG00000128872	TMOD2	0.55728	0.00229814	1	1	1
ENSG00000116898	MRPS15	0.557327	0.00161279	1	1	1
ENSG00000113758	DBN1	0.557327	0.000904298	1	1	1
ENSG00000198818	SFT2D1	0.557362	0.00109878	1	1	1
ENSG00000127334	DYRK2	0.557394	0.000493733	1	1	1
ENSG00000158773	USF1	0.557435	0.0037151	1	1	1
ENSG00000253910	PCDHGB2	0.55745	0.00106761	1	1	1
ENSG00000213741	RPS29	0.557492	0.00176525	1	1	1
ENSG00000148399	DPH7	0.557731	0.000998125	1	1	1
ENSG00000125954	CHURC1-FNTB	0.557733	0.000581759	1	1	1
ENSG00000164171	ITGA2	0.557754	0.000553345	1	1	1
ENSG00000198727	MT-CYB	0.557807	0.00128075	1	0	1
ENSG00000140199	SLC12A6	0.557815	0.000738233	1	1	1
ENSG00000183978	COA3	0.55784	0.00139956	1	1	1
ENSG00000184185	KCNJ12	0.557846	0.000417815	1	1	1
ENSG00000065534	MYLK	0.557902	0.00047635	1	1	1
ENSG00000176428	VPS37D	0.557973	0.00060886	1	1	1
ENSG00000196689	TRPV1	0.558012	0.000794406	1	1	1
ENSG00000140538	NTRK3	0.55805	0.0013702	1	1	1
ENSG00000214253	FIS1	0.5582	0.000776185	1	1	1
ENSG00000103037	SETD6	0.558259	0.000862075	1	1	1
ENSG00000187164	SHTN1	0.558325	0.00148251	1	1	1
ENSG00000186364	NUDT17	0.558327	0.0012237	1	1	1
ENSG00000197601	FAR1	0.558327	0.00102006	1	1	1
ENSG00000168314	MOBP	0.558336	0.000683181	1	1	1
ENSG00000061987	MON2	0.558473	0.000613832	1	1	1
ENSG00000108961	RANGRF	0.558474	0.00114926	1	1	1
ENSG00000118263	KLF7	0.558491	0.000571074	1	1	1
ENSG00000224897	POT1-AS1	0.55855	0.00184463	1	1	1
ENSG00000078900	TP73	0.558551	0.00106995	1	1	1
ENSG00000112761	WISP3	0.558603	0.000849254	1	1	1
ENSG00000144224	UBXN4	0.558634	0.000463823	1	1	1
ENSG00000183578	TNFAIP8L3	0.558736	0.00153619	1	1	1
ENSG00000196408	NOXO1	0.558812	0.000446367	1	1	1
ENSG00000172817	CYP7B1	0.558816	0.000831762	1	1	1
ENSG00000185290	NUPR2	0.558886	0.0026235	1	1	1
ENSG00000053524	MCF2L2	0.558917	0.00358387	1	0	1
ENSG00000141580	WDR45B	0.558929	0.0010022	1	1	1
ENSG00000263647	BPTFP1	0.558938	0.000605355	1	1	1
ENSG00000187778	MCRS1	0.558948	0.000602218	1	1	1
ENSG00000182606	TRAK1	0.559064	0.00104554	1	1	1
ENSG00000174744	BRMS1	0.559079	0.00105232	1	1	1
ENSG00000258754	LINC01579	0.559097	0.000500881	1	1	1
ENSG00000184990	SIVA1	0.559146	0.00145655	1	1	1
ENSG00000167930	FAM234A	0.559149	0.00162175	1	1	1
ENSG00000108381	ASPA	0.559245	0.000446367	1	1	1
ENSG00000188266	HYKK	0.559264	0.00173565	1	1	1
ENSG00000126106	TMEM53	0.559264	0.00045366	1	1	1
ENSG00000228253	MT-ATP8	0.559265	0.00103026	1	1	1
ENSG00000109762	SNX25	0.559355	0.000567665	1	1	1
ENSG00000184900	SUMO3	0.559364	0.000491912	1	1	1
ENSG00000138448	ITGAV	0.559581	0.00218412	1	1	1
ENSG00000103121	CMC2	0.559616	0.00136802	1	1	1
ENSG00000161281	COX7A1	0.55962	0.00068572	1	1	1
ENSG00000076201	PTPN23	0.559678	0.000656989	1	1	1
ENSG00000028116	VRK2	0.559859	0.00146681	1	1	1
ENSG00000168172	HOOK3	0.559901	0.000798678	1	1	1
ENSG00000269881	AC004754.1	0.559937	0.00106761	1	1	1
ENSG00000078725	BRINP1	0.560014	0.00108338	1	1	1
ENSG00000134107	BHLHE40	0.560028	0.000652015	1	1	1
ENSG00000279618	ENSG00000279618	0.560063	0.0017113	1	1	1
ENSG00000269242	AC010422.3	0.560077	0.00768117	1	1	1
ENSG00000139546	TARBP2	0.560122	0.00129629	1	1	1
ENSG00000054148	PHPT1	0.560126	0.000882819	1	1	1
ENSG00000116691	MIIP	0.560139	0.00406415	1	1	1
ENSG00000105290	APLP1	0.560151	0.000716654	1	1	1
ENSG00000164647	STEAP1	0.560225	0.000938303	1	1	1
ENSG00000127412	TRPV5	0.560319	0.00137195	1	1	1
ENSG00000167900	TK1	0.560412	0.00125453	1	1	1
ENSG00000166823	MESP1	0.560508	0.000454286	1	1	1
ENSG00000009335	UBE3C	0.560529	0.00191185	1	1	1
ENSG00000221946	FXYD7	0.560652	0.000905908	1	1	1
ENSG00000225507	AC069282.1	0.560654	0.000801414	1	1	1
ENSG00000043514	TRIT1	0.560681	0.00217982	1	1	1
ENSG00000188452	CERKL	0.560692	0.000757244	1	1	1
ENSG00000103495	MAZ	0.560722	0.00117243	1	1	1
ENSG00000136754	ABI1	0.560723	0.00152664	1	1	1
ENSG00000141127	PRPSAP2	0.560728	0.0011728	1	1	1
ENSG00000242419	PCDHGC4	0.560735	0.00108102	1	1	1
ENSG00000167258	CDK12	0.560793	0.00047635	1	1	1
ENSG00000179588	ZFPM1	0.560805	0.00106081	1	1	1
ENSG00000138606	SHF	0.560835	0.000553014	1	1	1
ENSG00000224032	EPB41L4A-AS1	0.561016	0.00336187	1	1	1
ENSG00000087495	PHACTR3	0.561046	0.00158368	1	1	1
ENSG00000220804	LINC01881	0.561054	0.000716654	1	1	1
ENSG00000005075	POLR2J	0.561071	0.000664185	1	1	1
ENSG00000099810	MTAP	0.561107	0.00118493	1	1	1
ENSG00000205323	SARNP	0.561146	0.00198283	1	1	1
ENSG00000187742	SECISBP2	0.561148	0.00150191	1	1	1
ENSG00000170584	NUDCD2	0.561155	0.00178787	1	1	1
ENSG00000105325	FZR1	0.561169	0.00169266	1	1	1
ENSG00000104859	CLASRP	0.561226	0.000831762	1	1	1
ENSG00000255073	ZFP91-CNTF	0.561256	0.000617002	1	1	1
ENSG00000242960	FTH1P23	0.561264	0.000622055	1	1	1
ENSG00000101181	MTG2	0.561278	0.00235222	1	1	1
ENSG00000187186	AL162231.1	0.561291	0.000795915	1	1	1
ENSG00000167733	HSD11B1L	0.561292	0.000741781	1	1	1
ENSG00000253537	PCDHGA7	0.561357	0.00104366	1	0	1
ENSG00000173889	PHC3	0.561361	0.000594722	1	1	1
ENSG00000132854	KANK4	0.561483	0.000519134	1	1	1
ENSG00000254501	AP003068.1	0.561488	0.00094206	1	1	1
ENSG00000108588	CCDC47	0.561495	0.00122853	1	1	1
ENSG00000134207	SYT6	0.561523	0.000519134	1	1	1
ENSG00000228620	Z97056.1	0.561579	0.0015605	1	0	1
ENSG00000103569	AQP9	0.561608	0.00142947	1	0	1
ENSG00000197776	KLHDC1	0.561655	0.000844295	1	1	1
ENSG00000081665	ZNF506	0.561705	0.00114213	1	1	1
ENSG00000265491	RNF115	0.561748	0.00121809	1	1	1
ENSG00000064115	TM7SF3	0.561797	0.00155216	1	1	1
ENSG00000160226	C21orf2	0.561922	0.00131233	1	1	1
ENSG00000135362	PRR5L	0.562017	0.00084034	1	1	1
ENSG00000100379	KCTD17	0.562094	0.000500881	1	1	1
ENSG00000121775	TMEM39B	0.562141	0.00244311	1	1	1
ENSG00000179546	HTR1D	0.562156	0.00149568	1	1	1
ENSG00000128283	CDC42EP1	0.562184	0.00118561	1	1	1
ENSG00000198899	MT-ATP6	0.562206	0.0015662	1	0	1
ENSG00000169738	DCXR	0.562254	0.00146379	1	1	1
ENSG00000267163	ENSG00000267163	0.562256	0.00143877	1	1	1
ENSG00000105229	PIAS4	0.562296	0.00192731	1	1	1
ENSG00000151148	UBE3B	0.5623	0.00174505	1	1	1
ENSG00000034510	TMSB10	0.562344	0.000728216	1	1	1
ENSG00000160948	VPS28	0.56238	0.00148137	1	1	1
ENSG00000148344	PTGES	0.562462	0.000800646	1	1	1
ENSG00000198156	NPIPB6	0.562507	0.000476272	1	1	1
ENSG00000158792	SPATA2L	0.562594	0.000638936	1	1	1
ENSG00000231663	AL355472.1	0.562685	0.000905908	1	1	1
ENSG00000179134	SAMD4B	0.562702	0.00136234	1	1	1
ENSG00000249158	PCDHA11	0.56274	0.00178	1	1	1
ENSG00000279428	AC087164.2	0.562746	0.0015605	1	1	1
ENSG00000168028	RPSA	0.562803	0.00156608	1	1	1
ENSG00000179388	EGR3	0.562829	0.00145246	1	1	1
ENSG00000038295	TLL1	0.562927	0.000540051	1	1	1
ENSG00000275066	SYNRG	0.563027	0.000740107	1	1	1
ENSG00000239268	AC092691.1	0.563149	0.00193701	1	1	1
ENSG00000196455	PIK3R4	0.563166	0.0015662	1	1	1
ENSG00000047579	DTNBP1	0.563273	0.00102241	1	1	1
ENSG00000117000	RLF	0.563302	0.000801414	1	1	1
ENSG00000210082	MT-RNR2	0.563358	0.00309263	1	0	1
ENSG00000156026	MCU	0.563365	0.00117243	1	1	1
ENSG00000058600	POLR3E	0.563405	0.00144791	1	1	1
ENSG00000279332	AC090772.4	0.563733	0.00085398	1	1	1
ENSG00000258210	AC144548.1	0.563779	0.0031274	1	1	1
ENSG00000167680	SEMA6B	0.563824	0.0012006	1	1	1
ENSG00000196724	ZNF418	0.563948	0.00125257	1	1	1
ENSG00000228594	FNDC10	0.564017	0.000963084	1	1	1
ENSG00000198960	ARMCX6	0.564081	0.00133073	1	1	1
ENSG00000064995	TAF11	0.564148	0.00136234	1	1	1
ENSG00000102302	FGD1	0.564208	0.000848747	1	1	1
ENSG00000260924	LINC01311	0.564293	0.00226975	1	1	1
ENSG00000092847	AGO1	0.564354	0.00385288	1	1	1
ENSG00000102910	LONP2	0.564374	0.00152664	1	1	1
ENSG00000066777	ARFGEF1	0.564492	0.000840324	1	1	1
ENSG00000120685	PROSER1	0.56452	0.000821257	1	1	1
ENSG00000102981	PARD6A	0.564551	0.000837383	1	1	1
ENSG00000116005	PCYOX1	0.564655	0.00174267	1	1	1
ENSG00000050130	JKAMP	0.564684	0.000796744	1	1	1
ENSG00000132591	ERAL1	0.564747	0.000927206	1	1	1
ENSG00000165424	ZCCHC24	0.564881	0.00167292	1	1	1
ENSG00000163050	COQ8A	0.564899	0.00123297	1	1	1
ENSG00000176248	ANAPC2	0.564936	0.00144253	1	1	1
ENSG00000078699	CBFA2T2	0.564967	0.00151278	1	1	1
ENSG00000272916	AC022400.6	0.565072	0.00060886	1	1	1
ENSG00000160305	DIP2A	0.565087	0.00196299	1	1	1
ENSG00000121440	PDZRN3	0.565124	0.00121704	1	1	1
ENSG00000131969	ABHD12B	0.565128	0.00280898	1	1	1
ENSG00000131374	TBC1D5	0.565185	0.000645949	1	1	1
ENSG00000129315	CCNT1	0.565222	0.000759696	1	1	1
ENSG00000164896	FASTK	0.565426	0.00152615	1	1	1
ENSG00000262413	AC145207.2	0.565487	0.000759696	1	1	1
ENSG00000163166	IWS1	0.565494	0.00133011	1	1	1
ENSG00000166595	FAM96B	0.565589	0.000574447	1	1	1
ENSG00000248859	LINC01574	0.565695	0.00108338	1	1	1
ENSG00000165688	PMPCA	0.565728	0.00156608	1	1	1
ENSG00000119699	TGFB3	0.565745	0.00240378	1	1	1
ENSG00000206557	TRIM71	0.565816	0.00227974	1	1	1
ENSG00000198553	KCNRG	0.565878	0.00139447	1	1	1
ENSG00000100462	PRMT5	0.565881	0.0016944	1	1	1
ENSG00000227500	SCAMP4	0.565881	0.00256887	1	1	1
ENSG00000166402	TUB	0.565938	0.00167292	1	1	1
ENSG00000272617	COG8	0.565955	0.00159072	1	1	1
ENSG00000148660	CAMK2G	0.565996	0.00132985	1	1	1
ENSG00000264578	AC009630.3	0.566101	0.00132205	1	1	1
ENSG00000103089	FA2H	0.566132	0.000519134	1	1	1
ENSG00000161671	EMC10	0.566193	0.00254918	1	1	1
ENSG00000261329	AC016597.1	0.566214	0.000892971	1	1	1
ENSG00000162032	SPSB3	0.566251	0.00138186	1	1	1
ENSG00000182372	CLN8	0.566275	0.00159017	1	1	1
ENSG00000122390	NAA60	0.566333	0.00211469	1	1	1
ENSG00000110436	SLC1A2	0.566406	0.00188531	1	0	1
ENSG00000272112	AC011374.2	0.566424	0.000882819	1	1	1
ENSG00000138459	SLC35A5	0.566616	0.000700066	1	1	1
ENSG00000129194	SOX15	0.566622	0.000663405	1	1	1
ENSG00000151079	KCNA6	0.566635	0.00139674	1	1	1
ENSG00000197724	PHF2	0.566642	0.00192731	1	1	1
ENSG00000068650	ATP11A	0.566657	0.00123154	1	1	1
ENSG00000198242	RPL23A	0.566662	0.00152664	1	1	1
ENSG00000169592	INO80E	0.566665	0.00190383	1	1	1
ENSG00000107130	NCS1	0.566874	0.00161023	1	1	1
ENSG00000130520	LSM4	0.566974	0.000927206	1	1	1
ENSG00000275832	ARHGAP23	0.566978	0.00205104	1	1	1
ENSG00000183207	RUVBL2	0.567013	0.00199978	1	1	1
ENSG00000123908	AGO2	0.567116	0.0016697	1	1	1
ENSG00000160075	SSU72	0.567188	0.002609	1	1	1
ENSG00000109680	TBC1D19	0.567215	0.00233727	1	1	1
ENSG00000181004	BBS12	0.567252	0.0013702	1	1	1
ENSG00000109265	KIAA1211	0.56726	0.000685283	1	1	1
ENSG00000160679	CHTOP	0.567297	0.00153771	1	1	1
ENSG00000090534	THPO	0.567304	0.000755849	1	1	1
ENSG00000154874	CCDC144B	0.567427	0.000680133	1	1	1
ENSG00000242485	MRPL20	0.567458	0.00124377	1	1	1
ENSG00000121064	SCPEP1	0.567489	0.000917952	1	1	1
ENSG00000122644	ARL4A	0.567524	0.00269121	1	1	1
ENSG00000011009	LYPLA2	0.567539	0.00169983	1	1	1
ENSG00000092068	SLC7A8	0.567543	0.00134422	1	1	1
ENSG00000155816	FMN2	0.567639	0.00112649	1	1	1
ENSG00000117411	B4GALT2	0.567647	0.00127278	1	1	1
ENSG00000258881	AC007040.2	0.567662	0.00094206	1	1	1
ENSG00000137872	SEMA6D	0.567664	0.000967754	1	1	1
ENSG00000154945	ANKRD40	0.567694	0.00152003	1	1	1
ENSG00000101265	RASSF2	0.567709	0.00104167	1	1	1
ENSG00000131165	CHMP1A	0.567765	0.00199134	1	1	1
ENSG00000130713	EXOSC2	0.567863	0.00130714	1	1	1
ENSG00000132024	CC2D1A	0.567931	0.00148137	1	1	1
ENSG00000136144	RCBTB1	0.568007	0.00105135	1	1	1
ENSG00000143995	MEIS1	0.568123	0.00217907	1	1	1
ENSG00000177613	CSTF2T	0.568139	0.000935915	1	1	1
ENSG00000174125	TLR1	0.568146	0.00060886	1	1	1
ENSG00000167889	MGAT5B	0.568182	0.00136186	1	1	1
ENSG00000101134	DOK5	0.568247	0.00201667	1	1	1
ENSG00000169247	SH3TC2	0.568317	0.000641658	1	1	1
ENSG00000064393	HIPK2	0.56837	0.00217687	1	1	1
ENSG00000050628	PTGER3	0.568383	0.00205483	1	1	1
ENSG00000145833	DDX46	0.568526	0.000794406	1	1	1
ENSG00000158023	WDR66	0.568634	0.000801414	1	1	1
ENSG00000080819	CPOX	0.568637	0.00192731	1	1	1
ENSG00000112339	HBS1L	0.56866	0.00185173	1	1	1
ENSG00000157106	SMG1	0.568676	0.000652015	1	1	1
ENSG00000168256	NKIRAS2	0.569004	0.00205104	1	1	1
ENSG00000183726	TMEM50A	0.569041	0.000757811	1	1	1
ENSG00000267426	AC087289.3	0.569138	0.00130964	1	1	1
ENSG00000114019	AMOTL2	0.569174	0.00212278	1	1	1
ENSG00000125775	SDCBP2	0.569186	0.00121177	1	1	1
ENSG00000166289	PLEKHF1	0.569299	0.00310343	1	1	1
ENSG00000257337	AC068888.1	0.569308	0.00496888	1	1	1
ENSG00000106803	SEC61B	0.56938	0.000886181	1	1	1
ENSG00000280304	AC104260.2	0.569431	0.00229814	1	1	1
ENSG00000204356	NELFE	0.569443	0.00277989	1	1	1
ENSG00000101298	SNPH	0.569496	0.00144257	1	1	1
ENSG00000170542	SERPINB9	0.569503	0.00126853	1	1	1
ENSG00000198862	LTN1	0.569529	0.000832509	1	1	1
ENSG00000137563	GGH	0.569536	0.00211219	1	1	1
ENSG00000183479	TREX2	0.569562	0.00504013	1	1	1
ENSG00000270670	MARK2P16	0.569618	0.00319976	1	1	1
ENSG00000124789	NUP153	0.569709	0.00090944	1	1	1
ENSG00000158716	DUSP23	0.569714	0.00192013	1	1	1
ENSG00000204628	RACK1	0.569827	0.0026453	1	1	1
ENSG00000172794	RAB37	0.569873	0.000790744	1	1	1
ENSG00000260001	TGFBR3L	0.569926	0.00173406	1	1	1
ENSG00000198888	MT-ND1	0.569953	0.00208903	1	0	1
ENSG00000175602	CCDC85B	0.570012	0.00106219	1	1	1
ENSG00000198744	MTCO3P12	0.570035	0.00199145	1	1	1
ENSG00000141522	ARHGDIA	0.570122	0.00184026	1	1	1
ENSG00000158715	SLC45A3	0.570169	0.00131861	1	1	1
ENSG00000168939	SPRY3	0.570194	0.00090944	1	1	1
ENSG00000146122	DAAM2	0.570261	0.00460677	1	1	1
ENSG00000177551	NHLH2	0.570296	0.00108473	1	1	1
ENSG00000245293	AC096564.1	0.57034	0.00238135	1	1	1
ENSG00000260539	ENSG00000260539	0.570372	0.00228356	1	1	1
ENSG00000176658	MYO1D	0.57044	0.00246656	1	1	1
ENSG00000165219	GAPVD1	0.570517	0.00123429	1	1	1
ENSG00000235706	DICER1-AS1	0.570689	0.00240068	1	1	1
ENSG00000113578	FGF1	0.570771	0.00255582	1	1	1
ENSG00000167536	DHRS13	0.570794	0.00189129	1	1	1
ENSG00000117114	ADGRL2	0.571123	0.00155835	1	1	1
ENSG00000110011	DNAJC4	0.571265	0.00205346	1	1	1
ENSG00000164587	RPS14	0.571316	0.00172527	1	1	1
ENSG00000175115	PACS1	0.571374	0.000706604	1	1	1
ENSG00000114805	PLCH1	0.571383	0.00310343	1	1	1
ENSG00000127914	AKAP9	0.571414	0.000792078	1	1	1
ENSG00000136271	DDX56	0.571579	0.00177796	1	1	1
ENSG00000277363	SRCIN1	0.571639	0.00309219	1	1	1
ENSG00000100029	PES1	0.571641	0.00335579	1	1	1
ENSG00000273437	AC108673.3	0.571684	0.00112296	1	1	1
ENSG00000107968	MAP3K8	0.571753	0.00141556	1	1	1
ENSG00000073150	PANX2	0.571761	0.00140614	1	1	1
ENSG00000128242	GAL3ST1	0.571906	0.00166307	1	1	1
ENSG00000119787	ATL2	0.57193	0.0022822	1	1	1
ENSG00000007545	CRAMP1	0.57195	0.000994399	1	1	1
ENSG00000255275	AL080251.1	0.571998	0.00133225	1	1	1
ENSG00000065802	ASB1	0.5721	0.00178992	1	1	1
ENSG00000134215	VAV3	0.572139	0.0015587	1	1	1
ENSG00000258539	AC068896.1	0.572173	0.00222656	1	1	1
ENSG00000100097	LGALS1	0.572282	0.000709957	1	1	1
ENSG00000168090	COPS6	0.572343	0.00467531	1	1	1
ENSG00000163481	RNF25	0.572348	0.00156691	1	1	1
ENSG00000117266	CDK18	0.572374	0.00191187	1	1	1
ENSG00000007516	BAIAP3	0.572402	0.00205104	1	1	1
ENSG00000224186	C5orf66	0.572438	0.0015992	1	1	1
ENSG00000170775	GPR37	0.572477	0.00078037	1	1	1
ENSG00000239407	Z68871.1	0.572508	0.00217687	1	1	1
ENSG00000112293	GPLD1	0.572524	0.00236357	1	1	1
ENSG00000261069	AC124312.3	0.572552	0.0020277	1	0	0
ENSG00000153406	NMRAL1	0.572584	0.001129	1	1	1
ENSG00000167641	PPP1R14A	0.572586	0.000831762	1	1	1
ENSG00000257069	AP001453.3	0.572618	0.00194176	1	0	1
ENSG00000150627	WDR17	0.572632	0.005286	1	1	1
ENSG00000122026	RPL21	0.572713	0.00186895	1	1	1
ENSG00000173208	ABCD2	0.572754	0.00210738	1	1	1
ENSG00000254806	SYS1-DBNDD2	0.572765	0.00179872	1	1	1
ENSG00000155008	APOOL	0.572809	0.00114146	1	1	1
ENSG00000239697	TNFSF12	0.572845	0.000793085	1	1	1
ENSG00000196605	ZNF846	0.572848	0.00172403	1	1	1
ENSG00000107331	ABCA2	0.572852	0.0025159	1	1	1
ENSG00000278977	AC003101.3	0.572855	0.00178377	1	1	1
ENSG00000188322	SBK1	0.572879	0.00108807	1	1	1
ENSG00000100181	TPTEP1	0.572955	0.00226957	1	1	1
ENSG00000185973	TMLHE	0.573011	0.0018945	1	1	1
ENSG00000180992	MRPL14	0.573022	0.00176201	1	1	1
ENSG00000185818	NAT8L	0.573033	0.00176201	1	1	1
ENSG00000182150	ERCC6L2	0.573055	0.000866758	1	1	1
ENSG00000130119	GNL3L	0.573118	0.00163795	1	1	1
ENSG00000196189	SEMA4A	0.573201	0.00315315	1	1	1
ENSG00000117408	IPO13	0.573429	0.00239566	1	1	1
ENSG00000122378	FAM213A	0.573437	0.00246254	1	1	1
ENSG00000175224	ATG13	0.573447	0.00245161	1	1	1
ENSG00000185737	NRG3	0.57346	0.00165066	1	1	1
ENSG00000119650	IFT43	0.573494	0.00148137	1	1	1
ENSG00000127081	ZNF484	0.573556	0.00135671	1	1	1
ENSG00000196923	PDLIM7	0.573664	0.000896095	1	1	1
ENSG00000249853	HS3ST5	0.573679	0.00199145	1	1	1
ENSG00000173486	FKBP2	0.573709	0.00167591	1	1	1
ENSG00000173273	TNKS	0.573729	0.00152577	1	1	1
ENSG00000196365	LONP1	0.57374	0.00164189	1	1	1
ENSG00000132879	FBXO44	0.573796	0.00104896	1	1	1
ENSG00000133639	BTG1	0.573797	0.00205751	1	1	1
ENSG00000084072	PPIE	0.573809	0.00253262	1	1	1
ENSG00000100425	BRD1	0.573828	0.00253828	1	1	1
ENSG00000173890	GPR160	0.573872	0.000793085	1	1	1
ENSG00000141540	TTYH2	0.573908	0.0015069	1	1	1
ENSG00000152439	ZNF773	0.574009	0.00182643	1	1	1
ENSG00000136960	ENPP2	0.574027	0.000821246	1	1	1
ENSG00000116685	KIAA2013	0.574045	0.00246254	1	1	1
ENSG00000001497	LAS1L	0.574058	0.00279143	1	1	1
ENSG00000130695	CEP85	0.574101	0.00209575	1	1	1
ENSG00000169562	GJB1	0.574115	0.000921283	1	1	1
ENSG00000250033	SLC7A11-AS1	0.574141	0.00232998	1	0	1
ENSG00000257390	AC023055.1	0.574157	0.00107913	1	1	1
ENSG00000196132	MYT1	0.57418	0.00167292	1	1	1
ENSG00000163517	HDAC11	0.574235	0.00189383	1	1	1
ENSG00000137642	SORL1	0.574248	0.00414656	1	1	1
ENSG00000116711	PLA2G4A	0.574307	0.00184463	1	1	1
ENSG00000196968	FUT11	0.574309	0.0019879	1	1	1
ENSG00000137462	TLR2	0.574325	0.00432777	1	1	1
ENSG00000197077	KIAA1671	0.574411	0.00310343	1	1	1
ENSG00000158079	PTPDC1	0.574413	0.00860054	1	1	1
ENSG00000198793	MTOR	0.574466	0.00283437	1	1	1
ENSG00000180834	MAP6D1	0.574485	0.00240697	1	1	1
ENSG00000073849	ST6GAL1	0.574556	0.00141022	1	1	1
ENSG00000267673	FDX2	0.574593	0.00132587	1	1	1
ENSG00000277688	AC243585.2	0.574619	0.000954791	1	1	1
ENSG00000138100	TRIM54	0.57464	0.00248756	1	1	1
ENSG00000169946	ZFPM2	0.574722	0.00137195	1	1	1
ENSG00000167755	KLK6	0.5748	0.000798678	1	1	1
ENSG00000167578	RAB4B	0.574853	0.00310343	1	1	1
ENSG00000157483	MYO1E	0.574875	0.00122075	1	1	1
ENSG00000261678	SCRT1	0.574909	0.00187663	1	1	1
ENSG00000271892	AC026790.1	0.574918	0.00192731	1	1	1
ENSG00000131018	SYNE1	0.574938	0.00106235	1	1	1
ENSG00000272420	AL513477.2	0.575011	0.00102668	1	1	1
ENSG00000231427	LINC01445	0.575078	0.00104457	1	1	1
ENSG00000082074	FYB1	0.575135	0.00138813	1	1	1
ENSG00000224924	LINC00320	0.575135	0.00135355	1	1	1
ENSG00000203875	SNHG5	0.575142	0.00250526	1	1	1
ENSG00000218227	AC136632.1	0.575185	0.00164726	1	1	1
ENSG00000141552	ANAPC11	0.575192	0.000756558	1	1	1
ENSG00000186468	RPS23	0.575211	0.00239319	1	1	1
ENSG00000090273	NUDC	0.57528	0.00486482	1	1	1
ENSG00000178826	TMEM139	0.575289	0.00163795	1	1	1
ENSG00000237187	NR2F1-AS1	0.575302	0.00205483	1	1	1
ENSG00000112964	GHR	0.575488	0.00124587	1	1	1
ENSG00000269293	ZSCAN16-AS1	0.575498	0.0023478	1	1	1
ENSG00000175772	LINC01106	0.575537	0.00234681	1	1	1
ENSG00000114268	PFKFB4	0.575556	0.00231489	1	1	1
ENSG00000156958	GALK2	0.575577	0.0015992	1	1	1
ENSG00000139722	VPS37B	0.575605	0.00294305	1	1	1
ENSG00000177034	MTX3	0.575605	0.0015605	1	1	1
ENSG00000151726	ACSL1	0.575677	0.00221313	1	1	1
ENSG00000079805	DNM2	0.575698	0.00392923	1	1	1
ENSG00000187094	CCK	0.575735	0.00199217	1	1	1
ENSG00000138821	SLC39A8	0.575758	0.00148137	1	1	1
ENSG00000275963	AC008115.4	0.575796	0.00132985	1	1	1
ENSG00000124074	ENKD1	0.575807	0.00193884	1	1	1
ENSG00000107443	CCNJ	0.575867	0.00123429	1	1	1
ENSG00000114956	DGUOK	0.575892	0.0061091	1	1	1
ENSG00000099821	POLRMT	0.575968	0.00216847	1	1	1
ENSG00000159079	C21orf59	0.576037	0.00137195	1	1	1
ENSG00000119522	DENND1A	0.576064	0.00283437	1	1	1
ENSG00000159842	ABR	0.576093	0.0025847	1	1	1
ENSG00000006607	FARP2	0.576108	0.00239324	1	1	1
ENSG00000267228	AC012254.2	0.576127	0.00282236	1	1	0
ENSG00000149557	FEZ1	0.576156	0.00315396	1	1	1
ENSG00000258315	C17orf49	0.57621	0.00174267	1	1	1
ENSG00000177051	FBXO46	0.576215	0.192402	0	1	1
ENSG00000171443	ZNF524	0.576233	0.00130892	1	1	1
ENSG00000070729	CNGB1	0.576309	0.00371604	1	1	1
ENSG00000143162	CREG1	0.576407	0.00143831	1	1	1
ENSG00000272677	AC124016.1	0.576423	0.00277937	1	1	1
ENSG00000134243	SORT1	0.57647	0.00105577	1	1	1
ENSG00000103154	NECAB2	0.576584	0.00259062	1	1	1
ENSG00000174373	RALGAPA1	0.5766	0.00130789	1	1	1
ENSG00000135333	EPHA7	0.576632	0.0021561	1	1	1
ENSG00000232520	AC012507.2	0.576643	0.00259119	1	0	0
ENSG00000125691	RPL23	0.576657	0.00289157	1	1	1
ENSG00000250584	LINC01511	0.576662	0.00280898	1	1	1
ENSG00000225670	CADM3-AS1	0.576676	0.00304177	1	1	1
ENSG00000111962	UST	0.576689	0.000866861	1	1	1
ENSG00000254673	AC110275.1	0.576748	0.001129	1	1	1
ENSG00000269998	ENSG00000269998	0.576789	0.00236879	1	1	1
ENSG00000197603	C5orf42	0.576947	0.00130337	1	1	1
ENSG00000160345	C9orf116	0.576991	0.00108338	1	1	1
ENSG00000164897	TMUB1	0.577005	0.00255582	1	1	1
ENSG00000255423	EBLN2	0.577016	0.00116296	1	1	1
ENSG00000109472	CPE	0.577052	0.00301036	1	1	1
ENSG00000161526	SAP30BP	0.577091	0.00280224	1	1	1
ENSG00000197461	PDGFA	0.577149	0.00410272	1	1	1
ENSG00000169884	WNT10B	0.577164	0.0026938	1	1	1
ENSG00000167468	GPX4	0.577262	0.00142476	1	1	1
ENSG00000204323	SMIM5	0.577289	0.0035531	1	1	1
ENSG00000179859	RNF227	0.577392	0.00176604	1	1	1
ENSG00000234912	SNHG20	0.577403	0.00125257	1	1	1
ENSG00000068903	SIRT2	0.577477	0.00279519	1	1	1
ENSG00000051825	MPHOSPH9	0.57753	0.00149313	1	1	1
ENSG00000125743	SNRPD2	0.577543	0.00536734	1	1	1
ENSG00000007376	RPUSD1	0.577614	0.00106708	1	1	1
ENSG00000119333	WDR34	0.577643	0.00122934	1	1	1
ENSG00000040275	SPDL1	0.577716	0.00238439	1	1	1
ENSG00000204842	ATXN2	0.577767	0.00177686	1	1	1
ENSG00000196663	TECPR2	0.577856	0.00241485	1	1	1
ENSG00000142751	GPN2	0.57789	0.00187444	1	1	1
ENSG00000099625	CBARP	0.577934	0.00210271	1	1	1
ENSG00000265188	AP001496.3	0.577983	0.00265764	1	1	1
ENSG00000165194	PCDH19	0.578032	0.00364138	1	1	1
ENSG00000176946	THAP4	0.578088	0.00274959	1	1	1
ENSG00000223820	CFL1P1	0.57809	0.00214049	1	0	0
ENSG00000248508	SRP14-AS1	0.57809	0.00286907	1	1	1
ENSG00000163932	PRKCD	0.578116	0.00363348	1	1	1
ENSG00000154654	NCAM2	0.578122	0.0091034	1	1	1
ENSG00000261221	ZNF865	0.578133	0.00160277	1	1	1
ENSG00000100605	ITPK1	0.578184	0.00280898	1	1	1
ENSG00000135720	DYNC1LI2	0.578203	0.00205375	1	1	1
ENSG00000147789	ZNF7	0.578226	0.00364199	1	1	1
ENSG00000235961	PNMA6A	0.578309	0.00632026	1	1	1
ENSG00000078687	TNRC6C	0.578317	0.00343426	1	1	1
ENSG00000144229	THSD7B	0.578341	0.00317188	1	1	1
ENSG00000114993	RTKN	0.578401	0.00264147	1	1	1
ENSG00000179673	RPRML	0.57849	0.00392778	1	1	1
ENSG00000124831	LRRFIP1	0.578525	0.00203607	1	1	1
ENSG00000122735	DNAI1	0.578531	0.00165355	1	1	1
ENSG00000165282	PIGO	0.578578	0.00101551	1	1	1
ENSG00000102984	ZNF821	0.578582	0.00150801	1	1	1
ENSG00000138463	DIRC2	0.578617	0.001962	1	1	1
ENSG00000253485	PCDHGA5	0.578621	0.00282236	1	1	1
ENSG00000126005	MMP24OS	0.578623	0.000988419	1	1	1
ENSG00000023191	RNH1	0.578694	0.00253084	1	1	1
ENSG00000152767	FARP1	0.578761	0.00240027	1	1	1
ENSG00000268751	SCGB1B2P	0.578834	0.00153174	1	1	1
ENSG00000177076	ACER2	0.578857	0.00194424	1	0	1
ENSG00000137878	GCOM1	0.578869	0.00201292	1	1	1
ENSG00000196396	PTPN1	0.578903	0.00317426	1	1	1
ENSG00000135426	TESPA1	0.578913	0.00188009	1	1	1
ENSG00000167100	SAMD14	0.578963	0.00149027	1	1	1
ENSG00000185477	GPRIN3	0.578998	0.00152173	1	1	1
ENSG00000157978	LDLRAP1	0.579	0.00199648	1	1	1
ENSG00000197958	RPL12	0.579003	0.00296585	1	1	1
ENSG00000132906	CASP9	0.579034	0.00308903	1	1	1
ENSG00000130962	PRRG1	0.579146	0.00148402	1	1	1
ENSG00000119632	IFI27L2	0.579168	0.00148137	1	1	1
ENSG00000073417	PDE8A	0.5792	0.00137875	1	1	1
ENSG00000128815	WDFY4	0.579202	0.00260508	1	1	1
ENSG00000148450	MSRB2	0.579217	0.0026453	1	1	1
ENSG00000175455	CCDC14	0.579238	0.00167608	1	1	1
ENSG00000164741	DLC1	0.57932	0.00170161	1	1	1
ENSG00000106278	PTPRZ1	0.579321	0.00304511	1	1	1
ENSG00000167323	STIM1	0.57934	0.00252941	1	1	1
ENSG00000183576	SETD3	0.579345	0.00222358	1	1	1
ENSG00000008324	SS18L2	0.579415	0.00367942	1	1	1
ENSG00000136379	ABHD17C	0.579428	0.00146681	1	1	1
ENSG00000119782	FKBP1B	0.579531	0.00262935	1	1	1
ENSG00000156140	ADAMTS3	0.579546	0.00178552	1	1	1
ENSG00000141279	NPEPPS	0.579567	0.00263704	1	1	1
ENSG00000125746	EML2	0.579577	0.00329503	1	1	1
ENSG00000185565	LSAMP	0.579628	0.00282085	1	1	1
ENSG00000267618	AC004223.3	0.579629	0.00279562	1	1	1
ENSG00000148218	ALAD	0.57965	0.00298416	1	1	1
ENSG00000241553	ARPC4	0.579653	0.00419495	1	1	1
ENSG00000103245	NARFL	0.579683	0.00259115	1	1	1
ENSG00000149187	CELF1	0.579717	0.00256887	1	1	1
ENSG00000276259	AC009118.3	0.579771	0.00231317	1	1	1
ENSG00000101391	CDK5RAP1	0.579773	0.00268852	1	1	1
ENSG00000174917	C19orf70	0.579881	0.00176201	1	1	1
ENSG00000162664	ZNF326	0.579884	0.00238619	1	1	1
ENSG00000147804	SLC39A4	0.579886	0.00246254	1	1	1
ENSG00000243725	TTC4	0.579948	0.00237963	1	1	1
ENSG00000189319	FAM53B	0.57998	0.00313928	1	1	1
ENSG00000267601	AC022966.1	0.580053	0.00273778	1	1	1
ENSG00000198886	MT-ND4	0.580101	0.00393719	1	0	1
ENSG00000198944	SOWAHA	0.580105	0.00315396	1	1	1
ENSG00000122035	RASL11A	0.580129	0.00218368	1	1	1
ENSG00000105701	FKBP8	0.580139	0.00281397	1	1	1
ENSG00000259143	AL356017.1	0.580191	0.00212759	1	0	1
ENSG00000122033	MTIF3	0.580202	0.00264805	1	1	1
ENSG00000173821	RNF213	0.580424	0.00496888	1	1	1
ENSG00000188153	COL4A5	0.58047	0.00094206	1	1	1
ENSG00000198576	ARC	0.580533	0.00189383	1	1	1
ENSG00000163291	PAQR3	0.580597	0.0022493	1	1	1
ENSG00000140479	PCSK6	0.580641	0.00325595	1	1	1
ENSG00000141499	WRAP53	0.580682	0.00489127	1	1	1
ENSG00000162298	SYVN1	0.580707	0.00304177	1	1	1
ENSG00000141447	OSBPL1A	0.580712	0.00244311	1	1	1
ENSG00000142444	TIMM29	0.580791	0.00189799	1	1	1
ENSG00000204104	TRAF3IP1	0.580819	0.00259115	1	1	1
ENSG00000184162	NR2C2AP	0.580863	0.00134609	1	1	1
ENSG00000235194	PPP1R3E	0.580864	0.00240378	1	1	1
ENSG00000143256	PFDN2	0.580869	0.00265025	1	1	1
ENSG00000114388	NPRL2	0.580875	0.00280224	1	1	1
ENSG00000105722	ERF	0.580913	0.00356838	1	1	1
ENSG00000162885	B3GALNT2	0.580933	0.00636291	1	1	1
ENSG00000169313	P2RY12	0.580979	0.00368748	1	1	1
ENSG00000153904	DDAH1	0.581013	0.00215064	1	1	1
ENSG00000133226	SRRM1	0.581061	0.00337265	1	1	1
ENSG00000250959	GLUD1P3	0.581098	0.00279317	1	1	1
ENSG00000227825	SLC9A7P1	0.581127	0.00434748	1	1	1
ENSG00000118946	PCDH17	0.581161	0.00279353	1	1	1
ENSG00000165138	ANKS6	0.581166	0.00125257	1	1	1
ENSG00000147649	MTDH	0.581196	0.00120446	1	1	1
ENSG00000187630	DHRS4L2	0.5812	0.00144257	1	1	1
ENSG00000237973	MTCO1P12	0.581288	0.00219759	1	1	0
ENSG00000120992	LYPLA1	0.581328	0.00230078	1	1	1
ENSG00000135116	HRK	0.581401	0.00226975	1	1	1
ENSG00000112282	MED23	0.58141	0.00137195	1	1	1
ENSG00000167861	HID1	0.581477	0.00239324	1	1	1
ENSG00000224470	ATXN1L	0.581614	0.00280898	1	1	1
ENSG00000167118	URM1	0.581634	0.00286804	1	1	1
ENSG00000205309	NT5M	0.581638	0.00144257	1	1	1
ENSG00000246705	H2AFJ	0.581679	0.00382109	1	1	1
ENSG00000138286	FAM149B1	0.581746	0.00368748	1	1	1
ENSG00000161082	CELF5	0.581771	0.00247349	1	1	1
ENSG00000078098	FAP	0.581786	0.00209575	1	0	1
ENSG00000109390	NDUFC1	0.581841	0.00235393	1	1	1
ENSG00000178385	PLEKHM3	0.581889	0.00108338	1	1	1
ENSG00000105373	NOP53	0.58189	0.0029694	1	1	1
ENSG00000149218	ENDOD1	0.581958	0.00156691	1	1	1
ENSG00000132535	DLG4	0.581958	0.00282085	1	1	1
ENSG00000050820	BCAR1	0.581982	0.00332563	1	1	1
ENSG00000188011	RTP5	0.582006	0.00112581	1	1	1
ENSG00000062725	APPBP2	0.582116	0.00118641	1	1	1
ENSG00000138650	PCDH10	0.582135	0.00311019	1	1	1
ENSG00000196465	MYL6B	0.582209	0.00217687	1	1	1
ENSG00000254870	ATP6V1G2-DDX39B	0.582247	0.00280898	1	1	1
ENSG00000158089	GALNT14	0.582253	0.00278471	1	1	1
ENSG00000081237	PTPRC	0.582303	0.00150791	1	1	1
ENSG00000160325	CACFD1	0.582436	0.00149313	1	1	1
ENSG00000158555	GDPD5	0.582459	0.00156691	1	1	1
ENSG00000213516	RBMXL1	0.582498	0.00317794	1	1	1
ENSG00000080822	CLDND1	0.582522	0.00286839	1	1	1
ENSG00000095370	SH2D3C	0.582529	0.00230078	1	1	1
ENSG00000185915	KLHL34	0.58259	0.00269121	1	0	1
ENSG00000173598	NUDT4	0.582606	0.00388934	1	1	1
ENSG00000108651	UTP6	0.582655	0.00319019	1	1	1
ENSG00000271870	AC024060.1	0.58277	0.0033528	1	1	1
ENSG00000048471	SNX29	0.582775	0.00196056	1	1	1
ENSG00000142684	ZNF593	0.582783	0.0035783	1	1	1
ENSG00000115756	HPCAL1	0.582812	0.00128554	1	1	1
ENSG00000123064	DDX54	0.582895	0.00392274	1	1	1
ENSG00000087253	LPCAT2	0.58297	0.00186569	1	1	1
ENSG00000212907	MT-ND4L	0.582974	0.00351639	1	1	1
ENSG00000122386	ZNF205	0.583006	0.00306775	1	1	1
ENSG00000126803	HSPA2	0.583122	0.00183958	1	1	1
ENSG00000249786	EAF1-AS1	0.583224	0.00424752	1	1	1
ENSG00000132507	EIF5A	0.583235	0.00775261	1	1	1
ENSG00000134532	SOX5	0.583289	0.00426638	1	0	1
ENSG00000250305	TRMT9B	0.583329	0.00181723	1	1	1
ENSG00000182168	UNC5C	0.58333	0.0026453	1	1	1
ENSG00000170949	ZNF160	0.583339	0.00285489	1	1	1
ENSG00000184702	SEPT5	0.583361	0.00279727	1	1	1
ENSG00000197555	SIPA1L1	0.583425	0.00388733	1	1	1
ENSG00000103479	RBL2	0.58345	0.00131341	1	1	1
ENSG00000260934	AC130456.5	0.58349	0.00459363	1	1	1
ENSG00000108387	SEPT4	0.583527	0.00617428	1	1	1
ENSG00000196363	WDR5	0.583574	0.00160966	1	1	1
ENSG00000249859	PVT1	0.583601	0.00139349	1	1	1
ENSG00000162434	JAK1	0.583733	0.00332254	1	1	1
ENSG00000089558	KCNH4	0.583763	0.00343121	1	1	1
ENSG00000144228	SPOPL	0.583789	0.00160999	1	1	1
ENSG00000187556	NANOS3	0.583813	0.00184463	1	1	1
ENSG00000111817	DSE	0.58384	0.00111249	1	1	1
ENSG00000173621	LRFN4	0.583936	0.0019698	1	1	1
ENSG00000182154	MRPL41	0.583958	0.00179049	1	1	1
ENSG00000225339	AL354740.1	0.584004	0.00178	1	1	1
ENSG00000077380	DYNC1I2	0.58406	0.00421479	1	1	1
ENSG00000167281	RBFOX3	0.584085	0.00271174	1	1	1
ENSG00000132702	HAPLN2	0.584097	0.00165827	1	1	1
ENSG00000100596	SPTLC2	0.584165	0.00415562	1	1	1
ENSG00000107362	ABHD17B	0.584189	0.00430091	1	1	1
ENSG00000183092	BEGAIN	0.584307	0.00203607	1	1	1
ENSG00000168675	LDLRAD4	0.584308	0.00296585	1	1	1
ENSG00000270647	TAF15	0.58432	0.00279972	1	1	1
ENSG00000144893	MED12L	0.584373	0.0125945	1	1	1
ENSG00000133019	CHRM3	0.584394	0.00337338	1	1	1
ENSG00000204922	UQCC3	0.584433	0.00301535	1	1	1
ENSG00000102780	DGKH	0.584522	0.00539315	1	1	1
ENSG00000108239	TBC1D12	0.584538	0.00255582	1	1	1
ENSG00000196371	FUT4	0.584606	0.00237985	1	1	1
ENSG00000272016	ENSG00000272016	0.584665	0.00276207	1	1	1
ENSG00000172943	PHF8	0.584678	0.00210166	1	1	1
ENSG00000258674	AC011448.1	0.584737	0.00251796	1	1	1
ENSG00000160932	LY6E	0.584748	0.00281951	1	1	1
ENSG00000107798	LIPA	0.584784	0.00217687	1	1	1
ENSG00000065060	UHRF1BP1	0.584872	0.00176604	1	1	1
ENSG00000120088	CRHR1	0.584957	0.00242054	1	1	1
ENSG00000131143	COX4I1	0.584971	0.00421479	1	1	1
ENSG00000149742	SLC22A9	0.585001	0.00312184	1	0	0
ENSG00000156858	PRR14	0.585009	0.00374336	1	1	1
ENSG00000231999	LRRC8C-DT	0.585078	0.00246254	1	1	1
ENSG00000100726	TELO2	0.585109	0.00244412	1	1	1
ENSG00000129595	EPB41L4A	0.585252	0.00289719	1	1	1
ENSG00000146063	TRIM41	0.585439	0.00288816	1	1	1
ENSG00000264272	AC100786.2	0.585441	0.00474196	1	1	1
ENSG00000204381	LAYN	0.585481	0.00262935	1	1	1
ENSG00000087074	PPP1R15A	0.585512	0.0042506	1	1	1
ENSG00000136717	BIN1	0.585523	0.00619124	1	1	1
ENSG00000272695	GAS6-AS2	0.58553	0.00285336	1	1	1
ENSG00000159069	FBXW5	0.58558	0.00213561	1	1	1
ENSG00000111911	HINT3	0.585604	0.00627617	1	1	1
ENSG00000232888	RPS11P5	0.585698	0.00193026	1	1	1
ENSG00000206053	JPT2	0.58572	0.00369059	1	1	1
ENSG00000213713	PIGCP1	0.585727	0.0051002	1	1	1
ENSG00000104960	PTOV1	0.585731	0.00335579	1	1	1
ENSG00000125740	FOSB	0.585742	0.00151069	1	1	1
ENSG00000124203	ZNF831	0.585769	0.00371604	1	1	1
ENSG00000184014	DENND5A	0.585772	0.00297467	1	1	1
ENSG00000110711	AIP	0.585857	0.00251798	1	1	1
ENSG00000175264	CHST1	0.585858	0.00280898	1	1	1
ENSG00000008283	CYB561	0.586107	0.00280224	1	1	1
ENSG00000151746	BICD1	0.586111	0.00197127	1	1	1
ENSG00000167674	HDGFL2	0.586149	0.00536617	1	1	1
ENSG00000146411	SLC2A12	0.586171	0.00262935	1	1	1
ENSG00000152894	PTPRK	0.586171	0.00295434	1	1	1
ENSG00000197183	NOL4L	0.586213	0.00250044	1	1	1
ENSG00000105656	ELL	0.586258	0.00355286	1	1	1
ENSG00000145147	SLIT2	0.586323	0.00459995	1	1	1
ENSG00000114853	ZBTB47	0.586384	0.00404358	1	1	1
ENSG00000229036	VDAC1P8	0.586436	0.00272904	1	1	1
ENSG00000272418	AC090607.4	0.586442	0.00149568	1	1	1
ENSG00000243444	PALM2	0.586445	0.00205483	1	1	1
ENSG00000198598	MMP17	0.586569	0.00221313	1	1	1
ENSG00000114446	IFT57	0.586591	0.00325307	1	1	1
ENSG00000106785	TRIM14	0.5866	0.00178787	1	1	1
ENSG00000162695	SLC30A7	0.586613	0.00217442	1	1	1
ENSG00000185989	RASA3	0.586625	0.00481366	1	1	1
ENSG00000135525	MAP7	0.586626	0.00431251	1	1	1
ENSG00000204991	SPIRE2	0.586629	0.00167292	1	1	1
ENSG00000257553	AC034102.4	0.586643	0.00227114	1	1	1
ENSG00000221955	SLC12A8	0.586645	0.00616368	1	1	1
ENSG00000258643	BCL2L2-PABPN1	0.586688	0.00347439	1	1	1
ENSG00000131016	AKAP12	0.586691	0.00413843	1	1	1
ENSG00000204498	NFKBIL1	0.586708	0.0134494	1	1	1
ENSG00000111231	GPN3	0.586735	0.00183958	1	1	1
ENSG00000167397	VKORC1	0.586769	0.00218963	1	1	1
ENSG00000073711	PPP2R3A	0.586831	0.00164726	1	1	1
ENSG00000116793	PHTF1	0.586873	0.00240378	1	1	1
ENSG00000141933	TPGS1	0.58689	0.00310706	1	1	1
ENSG00000272182	AC135507.1	0.586899	0.00404358	1	1	1
ENSG00000144021	CIAO1	0.586901	0.00622695	1	1	1
ENSG00000111344	RASAL1	0.586909	0.0024492	1	1	1
ENSG00000141668	CBLN2	0.586928	0.00518045	1	1	1
ENSG00000205035	AC136759.1	0.586961	0.00302413	1	1	1
ENSG00000099864	PALM	0.586968	0.00166343	1	1	1
ENSG00000127540	UQCR11	0.587	0.00269413	1	1	1
ENSG00000186660	ZFP91	0.587011	0.00296585	1	1	1
ENSG00000172613	RAD9A	0.587036	0.00268852	1	1	1
ENSG00000143079	CTTNBP2NL	0.587055	0.00159185	1	1	1
ENSG00000128641	MYO1B	0.587105	0.00311803	1	1	1
ENSG00000260669	AL096870.2	0.587182	0.00418886	1	1	1
ENSG00000076513	ANKRD13A	0.587212	0.00359232	1	1	1
ENSG00000144366	GULP1	0.587268	0.00660981	1	1	1
ENSG00000174611	KY	0.587269	0.00368748	1	0	1
ENSG00000189067	LITAF	0.58728	0.00201566	1	1	1
ENSG00000106714	CNTNAP3	0.587325	0.00315396	1	0	1
ENSG00000254732	AP001931.1	0.587366	0.0015069	1	1	1
ENSG00000093183	SEC22C	0.587452	0.00211722	1	1	1
ENSG00000129250	KIF1C	0.587473	0.003408	1	1	1
ENSG00000123560	PLP1	0.587476	0.00125931	1	0	1
ENSG00000214135	AC132008.2	0.587515	0.00254883	1	1	1
ENSG00000185065	AC000068.1	0.587524	0.00240011	1	1	1
ENSG00000167535	CACNB3	0.587552	0.00304211	1	1	1
ENSG00000131188	PRR7	0.587621	0.00146379	1	1	1
ENSG00000269243	AC008894.2	0.587729	0.00788436	1	1	1
ENSG00000146858	ZC3HAV1L	0.587743	0.00306555	1	0	0
ENSG00000197056	ZMYM1	0.58776	0.00302685	1	1	1
ENSG00000150054	MPP7	0.587842	0.00286839	1	1	1
ENSG00000100722	ZC3H14	0.587847	0.00298416	1	1	1
ENSG00000213939	AC091153.1	0.587867	0.0051507	1	1	1
ENSG00000055950	MRPL43	0.587966	0.00179872	1	1	1
ENSG00000255126	AP003064.1	0.587969	0.00189129	1	1	1
ENSG00000148358	GPR107	0.587969	0.00169662	1	1	1
ENSG00000065809	FAM107B	0.587992	0.00235073	1	1	1
ENSG00000011638	TMEM159	0.588056	0.00907093	1	1	1
ENSG00000267022	AC067968.1	0.588111	0.00407839	1	1	1
ENSG00000270172	ENSG00000270172	0.58813	0.00336187	1	1	1
ENSG00000136874	STX17	0.588157	0.00155835	1	1	1
ENSG00000180616	SSTR2	0.588158	0.00295361	1	1	1
ENSG00000036530	CYP46A1	0.588191	0.00292397	1	1	1
ENSG00000147100	SLC16A2	0.588201	0.00388989	1	1	1
ENSG00000136867	SLC31A2	0.588202	0.00174	1	1	1
ENSG00000151687	ANKAR	0.588269	0.00233082	1	1	1
ENSG00000188026	RILPL1	0.588309	0.00525865	1	1	1
ENSG00000165752	STK32C	0.588367	0.00315298	1	1	1
ENSG00000261292	AC110491.1	0.58837	0.00347239	1	1	1
ENSG00000243199	AC115223.1	0.588386	0.00250403	1	1	1
ENSG00000129295	LRRC6	0.588414	0.00626469	1	1	1
ENSG00000137106	GRHPR	0.588514	0.00933247	1	1	1
ENSG00000169446	MMGT1	0.588573	0.0031599	1	1	1
ENSG00000102383	ZDHHC15	0.58858	0.00857999	1	1	1
ENSG00000064042	LIMCH1	0.588582	0.00384115	1	1	1
ENSG00000198840	MT-ND3	0.588611	0.00534511	1	0	1
ENSG00000155511	GRIA1	0.588684	0.00408276	1	1	1
ENSG00000087111	PIGS	0.588707	0.00239324	1	1	1
ENSG00000257342	AC025165.2	0.588725	0.00178	1	1	1
ENSG00000184924	PTRHD1	0.588788	0.00167358	1	1	1
ENSG00000265118	AC134669.1	0.588822	0.00135199	1	1	1
ENSG00000169118	CSNK1G1	0.588862	0.00213561	1	1	1
ENSG00000109586	GALNT7	0.58888	0.00259115	1	1	1
ENSG00000089177	KIF16B	0.588957	0.00354045	1	1	1
ENSG00000228409	CCT6P1	0.58901	0.0019698	1	1	1
ENSG00000120055	C10orf95	0.589048	0.00244412	1	1	1
ENSG00000187372	PCDHB13	0.589097	0.00413266	1	1	1
ENSG00000162910	MRPL55	0.589116	0.00566854	1	1	1
ENSG00000150867	PIP4K2A	0.589125	0.00161279	1	1	1
ENSG00000277726	AL109811.4	0.58916	0.00379576	1	1	1
ENSG00000117676	RPS6KA1	0.589168	0.00382913	1	1	1
ENSG00000125730	C3	0.589204	0.00393956	1	1	1
ENSG00000278615	C11orf98	0.589233	0.00454578	1	1	1
ENSG00000100056	ESS2	0.589236	0.0031967	1	1	1
ENSG00000233138	AL023584.1	0.589241	0.00402176	1	1	1
ENSG00000182979	MTA1	0.589245	0.00396678	1	1	1
ENSG00000112855	HARS2	0.589286	0.00283437	1	1	1
ENSG00000144647	POMGNT2	0.589373	0.00334262	1	1	1
ENSG00000130881	LRP3	0.589373	0.00304511	1	1	1
ENSG00000178057	NDUFAF3	0.589391	0.00357764	1	1	1
ENSG00000241728	AP001062.3	0.589408	0.00521109	1	1	1
ENSG00000266340	AC138207.7	0.589487	0.00212145	1	1	1
ENSG00000168795	ZBTB5	0.589491	0.00189383	1	1	1
ENSG00000264364	DYNLL2	0.5895	0.00347033	1	1	1
ENSG00000132274	TRIM22	0.589516	0.00394926	1	1	1
ENSG00000262732	AC010401.1	0.589538	0.00306597	1	0	1
ENSG00000146556	WASH2P	0.589597	0.00310343	1	1	1
ENSG00000279529	AC008764.8	0.589646	0.00404358	1	1	1
ENSG00000197969	VPS13A	0.589705	0.00600399	1	1	1
ENSG00000136158	SPRY2	0.589723	0.00241602	1	1	1
ENSG00000047315	POLR2B	0.58973	0.00434394	1	1	1
ENSG00000279355	AGPAT4-IT1	0.589753	0.00227114	1	1	1
ENSG00000144868	TMEM108	0.589765	0.00430591	1	1	1
ENSG00000188467	SLC24A5	0.589805	0.0065022	1	1	0
ENSG00000135312	HTR1B	0.589846	0.0033902	1	0	0
ENSG00000179632	MAF1	0.589879	0.00385288	1	1	1
ENSG00000175077	RTP1	0.589927	0.00367787	1	1	1
ENSG00000164855	TMEM184A	0.589928	0.0049248	1	1	1
ENSG00000165323	FAT3	0.589948	0.0047902	1	1	1
ENSG00000159905	ZNF221	0.589973	0.00213921	1	1	1
ENSG00000119285	HEATR1	0.58998	0.00280898	1	1	1
ENSG00000270231	NBPF8	0.590016	0.0015662	1	1	1
ENSG00000060491	OGFR	0.590019	0.00351639	1	1	1
ENSG00000111249	CUX2	0.590025	0.00364199	1	1	1
ENSG00000100276	RASL10A	0.590052	0.00321446	1	1	1
ENSG00000143436	MRPL9	0.590059	0.00545961	1	1	1
ENSG00000267261	AC099811.2	0.590077	0.00296585	1	1	1
ENSG00000141505	ASGR1	0.590082	0.00436425	1	1	1
ENSG00000237126	AC073254.1	0.590103	0.00335579	1	1	1
ENSG00000178996	SNX18	0.59013	0.0023478	1	1	1
ENSG00000106245	BUD31	0.590211	0.00437286	1	1	1
ENSG00000127220	ABHD8	0.590282	0.00413266	1	1	1
ENSG00000100116	GCAT	0.590297	0.00280898	1	1	1
ENSG00000225877	PSG8-AS1	0.590329	0.00246191	1	1	1
ENSG00000240972	MIF	0.590354	0.00276386	1	1	1
ENSG00000127863	TNFRSF19	0.590416	0.00169983	1	1	1
ENSG00000001631	KRIT1	0.590445	0.00247622	1	1	1
ENSG00000154118	JPH3	0.590506	0.00307979	1	1	1
ENSG00000226937	CEP164P1	0.590508	0.00216847	1	1	1
ENSG00000150681	RGS18	0.590613	0.00503671	1	1	1
ENSG00000101180	HRH3	0.590656	0.00297214	1	1	1
ENSG00000267470	ZNF571-AS1	0.590661	0.00331069	1	1	1
ENSG00000082556	OPRK1	0.590703	0.00405026	1	1	1
ENSG00000251201	TMED7-TICAM2	0.590742	0.0035707	1	0	1
ENSG00000100731	PCNX1	0.590757	0.00149377	1	1	1
ENSG00000242950	ERVW-1	0.590798	0.00265025	1	1	1
ENSG00000260081	AF274858.1	0.590842	0.0031967	1	1	1
ENSG00000119121	TRPM6	0.5909	0.0035707	1	1	1
ENSG00000145241	CENPC	0.590948	0.00182643	1	1	1
ENSG00000109790	KLHL5	0.590988	0.00382267	1	1	1
ENSG00000238045	AC009133.1	0.590992	0.00475629	1	1	1
ENSG00000139517	LNX2	0.591023	0.00213921	1	1	1
ENSG00000198121	LPAR1	0.591206	0.00493249	1	1	1
ENSG00000145860	RNF145	0.591338	0.00347439	1	1	1
ENSG00000065054	SLC9A3R2	0.591382	0.00345124	1	1	1
ENSG00000179262	RAD23A	0.591418	0.0154063	1	1	1
ENSG00000130772	MED18	0.591468	0.00315396	1	1	1
ENSG00000270558	AC025449.1	0.591533	0.00193873	1	1	1
ENSG00000170248	PDCD6IP	0.591556	0.00159266	1	1	1
ENSG00000198785	GRIN3A	0.59157	0.00278162	1	1	1
ENSG00000175550	DRAP1	0.591606	0.00452442	1	1	1
ENSG00000198947	DMD	0.591681	0.00580412	1	1	1
ENSG00000136682	CBWD2	0.59174	0.00569736	1	1	1
ENSG00000251455	AC092611.1	0.591757	0.00296014	1	1	1
ENSG00000107281	NPDC1	0.591757	0.00347169	1	1	1
ENSG00000185024	BRF1	0.59182	0.00436598	1	1	1
ENSG00000198963	RORB	0.591825	0.00359483	1	1	1
ENSG00000278991	AC090181.3	0.591833	0.00508926	1	1	1
ENSG00000185049	NELFA	0.591838	0.00359129	1	1	1
ENSG00000178860	MSC	0.59185	0.00416328	1	1	1
ENSG00000138593	SECISBP2L	0.591878	0.00393956	1	1	1
ENSG00000149633	KIAA1755	0.591894	0.00414857	1	1	1
ENSG00000205116	TMEM88B	0.591922	0.00234186	1	1	1
ENSG00000091129	NRCAM	0.59196	0.00626577	1	1	1
ENSG00000159399	HK2	0.592029	0.00394486	1	1	1
ENSG00000268518	AC020909.2	0.592105	0.00197127	1	1	1
ENSG00000235098	ANKRD65	0.592206	0.00421935	1	1	1
ENSG00000135439	AGAP2	0.592231	0.00280898	1	1	1
ENSG00000078487	ZCWPW1	0.592305	0.00396078	1	1	1
ENSG00000116871	MAP7D1	0.592342	0.00374336	1	1	1
ENSG00000175634	RPS6KB2	0.592346	0.00660949	1	1	1
ENSG00000165995	CACNB2	0.592368	0.00285375	1	1	1
ENSG00000128512	DOCK4	0.592405	0.00239751	1	1	1
ENSG00000177868	SVBP	0.592499	0.00416886	1	1	1
ENSG00000173083	HPSE	0.59261	0.00196056	1	1	1
ENSG00000106799	TGFBR1	0.592704	0.00499684	1	1	1
ENSG00000174886	NDUFA11	0.592713	0.00496888	1	1	1
ENSG00000274029	AC069209.1	0.592754	0.00539598	1	1	1
ENSG00000115507	OTX1	0.592789	0.00417452	1	0	0
ENSG00000257270	AL928654.2	0.592841	0.00517587	1	1	1
ENSG00000137672	TRPC6	0.592849	0.0051393	1	1	1
ENSG00000154222	CC2D1B	0.592889	0.00884776	1	1	1
ENSG00000149926	FAM57B	0.592893	0.0025486	1	1	1
ENSG00000079308	TNS1	0.592942	0.0050703	1	1	1
ENSG00000169860	P2RY1	0.592964	0.00472697	1	1	1
ENSG00000180879	SSR4	0.592976	0.00893523	1	1	1
ENSG00000203280	AL022323.1	0.593023	0.00473694	1	1	0
ENSG00000130876	SLC7A10	0.593038	0.00327645	1	1	1
ENSG00000174136	RGMB	0.593057	0.00589603	1	1	1
ENSG00000123473	STIL	0.593146	0.00315664	1	1	1
ENSG00000120519	SLC10A7	0.593199	0.0023545	1	1	1
ENSG00000106133	NSUN5P2	0.593229	0.00702085	1	1	1
ENSG00000185009	AP3M1	0.593254	0.00352563	1	1	1
ENSG00000137824	RMDN3	0.593261	0.00297467	1	1	1
ENSG00000250510	GPR162	0.593267	0.00327042	1	1	1
ENSG00000050165	DKK3	0.593282	0.00562434	1	1	1
ENSG00000164935	DCSTAMP	0.593316	0.00427637	1	1	1
ENSG00000223573	TINCR	0.593362	0.00618456	1	1	1
ENSG00000160058	BSDC1	0.593418	0.0234099	1	1	1
ENSG00000068745	IP6K2	0.59348	0.00519934	1	1	1
ENSG00000144535	DIS3L2	0.59353	0.00489127	1	1	1
ENSG00000188343	FAM92A	0.593567	0.00521109	1	1	1
ENSG00000155090	KLF10	0.593589	0.00199648	1	1	1
ENSG00000243232	PCDHAC2	0.593689	0.00963897	1	1	1
ENSG00000163288	GABRB1	0.593785	0.00228376	1	1	1
ENSG00000137942	FNBP1L	0.593821	0.0051303	1	1	1
ENSG00000171291	ZNF439	0.593891	0.00282236	1	1	1
ENSG00000172809	RPL38	0.593892	0.00538531	1	1	1
ENSG00000180917	CMTR2	0.593902	0.00336965	1	1	1
ENSG00000196562	SULF2	0.593904	0.00263193	1	1	1
ENSG00000129003	VPS13C	0.594061	0.00205375	1	1	1
ENSG00000254838	GVINP1	0.594154	0.00391777	1	0	1
ENSG00000261061	AC092718.4	0.594172	0.00433355	1	1	1
ENSG00000151882	CCL28	0.594173	0.00532056	1	1	1
ENSG00000162302	RPS6KA4	0.594212	0.00393717	1	1	1
ENSG00000162687	KCNT2	0.594251	0.00695011	1	1	1
ENSG00000166147	FBN1	0.594346	0.00210267	1	1	1
ENSG00000121742	GJB6	0.594364	0.00492886	1	0	1
ENSG00000141098	GFOD2	0.594531	0.00282085	1	1	1
ENSG00000172005	MAL	0.594626	0.0035707	1	1	1
ENSG00000237517	DGCR5	0.594675	0.00368748	1	1	1
ENSG00000186318	BACE1	0.594738	0.00701837	1	1	1
ENSG00000178175	ZNF366	0.594813	0.00534405	1	0	1
ENSG00000203993	ARRDC1-AS1	0.59485	0.00635815	1	1	1
ENSG00000187109	NAP1L1	0.594854	0.00525447	1	1	1
ENSG00000198265	HELZ	0.594857	0.00406705	1	1	1
ENSG00000137145	DENND4C	0.594869	0.00689627	1	0	1
ENSG00000079156	OSBPL6	0.594896	0.004916	1	1	1
ENSG00000144283	PKP4	0.594939	0.00336249	1	1	1
ENSG00000102699	PARP4	0.59498	0.00288536	1	1	1
ENSG00000162194	LBHD1	0.595002	0.0029694	1	1	1
ENSG00000260918	AC107398.3	0.595035	0.00508926	1	1	1
ENSG00000172318	B3GALT1	0.595046	0.00590281	1	1	1
ENSG00000100139	MICALL1	0.59512	0.00993285	1	1	1
ENSG00000048405	ZNF800	0.595141	0.00191878	1	1	1
ENSG00000146067	FAM193B	0.595161	0.00402031	1	1	1
ENSG00000196812	ZSCAN16	0.595163	0.00576264	1	1	1
ENSG00000111615	KRR1	0.595168	0.00682336	1	1	1
ENSG00000166086	JAM3	0.595301	0.00491532	1	1	1
ENSG00000130813	C19orf66	0.595321	0.00485525	1	1	1
ENSG00000196549	MME	0.595502	0.00348805	1	1	1
ENSG00000187210	GCNT1	0.595577	0.00431386	1	1	1
ENSG00000232748	AC135050.1	0.59567	0.00514364	1	1	1
ENSG00000147642	SYBU	0.595709	0.00394518	1	1	1
ENSG00000137221	TJAP1	0.595712	0.00538796	1	1	1
ENSG00000170989	S1PR1	0.595758	0.00279562	1	1	1
ENSG00000240225	ZNF542P	0.595768	0.00186194	1	1	1
ENSG00000085511	MAP3K4	0.59578	0.00499684	1	1	1
ENSG00000169228	RAB24	0.595794	0.00321446	1	1	1
ENSG00000165716	FAM69B	0.59586	0.00347239	1	1	1
ENSG00000228223	HCG11	0.595884	0.00620849	1	1	1
ENSG00000168653	NDUFS5	0.595923	0.00472697	1	1	1
ENSG00000087086	FTL	0.595955	0.0106963	1	0	1
ENSG00000121653	MAPK8IP1	0.596006	0.00392778	1	1	1
ENSG00000160633	SAFB	0.596085	0.00609937	1	1	1
ENSG00000111361	EIF2B1	0.596124	0.00592709	1	1	1
ENSG00000253200	AC037459.3	0.596135	0.00415	1	1	1
ENSG00000175104	TRAF6	0.596158	0.00212006	1	1	1
ENSG00000196083	IL1RAP	0.596161	0.00416052	1	1	1
ENSG00000168297	PXK	0.596164	0.0055279	1	1	1
ENSG00000171303	KCNK3	0.5962	0.00389276	1	1	1
ENSG00000071242	RPS6KA2	0.596244	0.00545961	1	1	1
ENSG00000126368	NR1D1	0.596297	0.00250526	1	1	1
ENSG00000175305	CCNE2	0.596299	0.00374336	1	1	1
ENSG00000149357	LAMTOR1	0.596402	0.00405654	1	1	1
ENSG00000143324	XPR1	0.59641	0.00425938	1	1	1
ENSG00000119402	FBXW2	0.596422	0.00252941	1	1	1
ENSG00000064787	BCAS1	0.596428	0.00545961	1	1	1
ENSG00000183648	NDUFB1	0.596462	0.004916	1	1	1
[truncated: 5,573 more rows]

## Sheet: Unique clrDV DV genes BH
	gene_symbol	SD_ratio	adj_pval
ENSG00000223820	CFL1P1	0.57809	0.00214049
ENSG00000221994	ZNF630	0.622556	0.00868499
ENSG00000179277	MEIS3P1	0.629847	0.0185962
ENSG00000130433	CACNG6	0.637855	0.0339284
ENSG00000267904	AC024075.1	0.638167	0.0172145
ENSG00000253553	AC090568.2	0.651407	0.0247578
ENSG00000233427	AL009181.1	0.656636	0.0233633
ENSG00000278934	AC117489.1	0.660026	0.0371689
ENSG00000100473	COCH	0.663007	0.0346704
ENSG00000279838	AL356273.3	0.667356	0.0483351
ENSG00000226015	CCT8P1	0.674405	0.0472554

## Sheet: Unique clrDV DV genes BY
	gene_symbol	SD_ratio	adj_pval
ENSG00000261069	AC124312.3	0.572552	0.0020277
ENSG00000232520	AC012507.2	0.576643	0.00259119
ENSG00000223820	CFL1P1	0.57809	0.00214049
ENSG00000149742	SLC22A9	0.585001	0.00312184
ENSG00000146858	ZC3HAV1L	0.587743	0.00306555
ENSG00000135312	HTR1B	0.589846	0.0033902
ENSG00000115507	OTX1	0.592789	0.00417452
ENSG00000101188	NTSR1	0.596976	0.00407839
ENSG00000272923	AC092139.1	0.598211	0.00521109
ENSG00000133110	POSTN	0.598227	0.0049387
ENSG00000236268	LINC01361	0.598667	0.00317012
ENSG00000271133	AC004130.1	0.599706	0.00497132
ENSG00000236963	LINC01141	0.601185	0.00628553
ENSG00000133116	KL	0.609565	0.00708526
ENSG00000137571	SLCO5A1	0.610175	0.00715769
ENSG00000183654	MARCH11	0.61064	0.00496888
ENSG00000053328	METTL24	0.612021	0.00803554
ENSG00000239653	PSMD6-AS2	0.617427	0.0100905
ENSG00000124134	KCNS1	0.617698	0.00748066
ENSG00000253722	AC010834.1	0.620349	0.00851723
ENSG00000271824	SMIM32	0.620875	0.013171
ENSG00000221994	ZNF630	0.622556	0.00868499
ENSG00000261705	ENSG00000261705	0.62335	0.0110329
ENSG00000229325	ACAP2-IT1	0.625195	0.0178731
ENSG00000247853	AC006064.2	0.626191	0.00972292
ENSG00000228971	AL356479.1	0.626344	0.00971576
ENSG00000165349	SLC7A3	0.626761	0.0166543
ENSG00000179277	MEIS3P1	0.629847	0.0185962
ENSG00000230417	LINC00595	0.630077	0.0142052
ENSG00000280119	AC093642.2	0.631219	0.0186265
ENSG00000169035	KLK7	0.631688	0.0132964
ENSG00000219410	AC125494.1	0.632704	0.0115775
ENSG00000256100	AP000721.1	0.633891	0.0106817
ENSG00000079257	LXN	0.634176	0.023436
ENSG00000155011	DKK2	0.634494	0.0226511
ENSG00000233058	LINC00884	0.634538	0.0270473
ENSG00000254221	PCDHGB1	0.634786	0.0171507
ENSG00000273343	AC007663.4	0.635329	0.0162296
ENSG00000159450	TCHH	0.636011	0.0166062
ENSG00000051341	POLQ	0.636918	0.0212836
ENSG00000090889	KIF4A	0.637041	0.0177486
ENSG00000232040	ZBED9	0.637789	0.0207567
ENSG00000130433	CACNG6	0.637855	0.0339284
ENSG00000113494	PRLR	0.638041	0.0241159
ENSG00000267904	AC024075.1	0.638167	0.0172145
ENSG00000165985	C1QL3	0.639747	0.0224411
ENSG00000261728	AL138690.1	0.640404	0.0263942
ENSG00000274376	ADAMTS7P1	0.641384	0.0219223
ENSG00000267506	AC021683.2	0.641935	0.0329035
ENSG00000160183	TMPRSS3	0.642677	0.0207976
ENSG00000275286	AC025253.1	0.644181	0.0294378
ENSG00000062524	LTK	0.648134	0.0301027
ENSG00000275340	FGD5P1	0.648638	0.0276996
ENSG00000167754	KLK5	0.649418	0.03653
ENSG00000255310	AF131215.5	0.650481	0.0334034
ENSG00000178394	HTR1A	0.650825	0.0367471
ENSG00000182722	SEPHS1P1	0.650915	0.0370171
ENSG00000146374	RSPO3	0.651374	0.0320393
ENSG00000253553	AC090568.2	0.651407	0.0247578
ENSG00000168872	DDX19A	0.651481	0.0237061
ENSG00000198863	RUNDC1	0.652314	0.0370571
ENSG00000254553	AL033529.1	0.653392	0.0320011
ENSG00000163867	ZMYM6	0.653472	0.0167274
ENSG00000128250	RFPL1	0.653538	0.0226
ENSG00000123610	TNFAIP6	0.654007	0.0292542
ENSG00000277734	TRAC	0.654798	0.0369892
ENSG00000251372	LINC00499	0.654996	0.0303691
ENSG00000108506	INTS2	0.655209	0.0243037
ENSG00000131788	PIAS3	0.655556	0.0230295
ENSG00000182890	GLUD2	0.656322	0.0349209
ENSG00000279624	ENSG00000279624	0.656388	0.0401415
ENSG00000233427	AL009181.1	0.656636	0.0233633
ENSG00000162745	OLFML2B	0.657015	0.0296708
ENSG00000254959	INMT-MINDY4	0.657536	0.0370785
ENSG00000183778	B3GALT5	0.658717	0.0281622
ENSG00000240764	PCDHGC5	0.658938	0.0446224
ENSG00000262155	LINC02175	0.659051	0.0379222
ENSG00000278934	AC117489.1	0.660026	0.0371689
ENSG00000175497	DPP10	0.660147	0.0482563
ENSG00000214960	ISPD	0.660402	0.0262603
ENSG00000229203	AC103564.1	0.660532	0.0310181
ENSG00000253642	AF279873.3	0.660609	0.0474289
ENSG00000104133	SPG11	0.660623	0.0252305
ENSG00000248050	AC079061.1	0.660643	0.0272608
ENSG00000154478	GPR26	0.660861	0.0357227
ENSG00000043462	LCP2	0.660911	0.0385654
ENSG00000119125	GDA	0.661255	0.0311035
ENSG00000263707	AC005277.1	0.661947	0.0427632
ENSG00000233178	AL161457.2	0.662211	0.0406361
ENSG00000148702	HABP2	0.66253	0.0415988
ENSG00000100473	COCH	0.663007	0.0346704
ENSG00000233554	B4GALT1-AS1	0.6635	0.0476338
ENSG00000254187	AC008708.2	0.664305	0.0362117
ENSG00000169851	PCDH7	0.664413	0.0430103
ENSG00000213020	ZNF611	0.664591	0.026414
ENSG00000108924	HLF	0.665475	0.0370785
ENSG00000268220	AC008040.5	0.665739	0.0326413
ENSG00000256229	ZNF486	0.665746	0.0288628
ENSG00000266256	LINC00683	0.666045	0.040667
ENSG00000250644	AC068580.4	0.666173	0.0398968
ENSG00000161542	PRPSAP1	0.666279	0.0352334
ENSG00000231340	ACTG1P10	0.666451	0.0391907
ENSG00000174332	GLIS1	0.666606	0.0395524
ENSG00000167637	ZNF283	0.666789	0.0296351
ENSG00000279838	AL356273.3	0.667356	0.0483351
ENSG00000149532	CPSF7	0.667594	0.0453229
ENSG00000170365	SMAD1	0.667648	0.0455101
ENSG00000206432	TMEM200C	0.667903	0.042539
ENSG00000007174	DNAH9	0.667959	0.0475278
ENSG00000187664	HAPLN4	0.668691	0.0497464
ENSG00000110660	SLC35F2	0.668945	0.0423031
ENSG00000270028	AC079315.1	0.669783	0.040667
ENSG00000152034	MCHR2	0.670326	0.0430123
ENSG00000272880	AL161734.1	0.670731	0.0422749
ENSG00000136536	MARCH7	0.670757	0.0347011
ENSG00000135842	FAM129A	0.671639	0.0348329
ENSG00000105866	SP4	0.671743	0.0331134
ENSG00000269737	AL691432.1	0.671899	0.0496835
ENSG00000182508	LHFPL1	0.67207	0.0440208
ENSG00000204120	GIGYF2	0.673138	0.0451117
ENSG00000187240	DYNC2H1	0.673145	0.0458865
ENSG00000090006	LTBP4	0.673369	0.0390413
ENSG00000197563	PIGN	0.673747	0.0438358
ENSG00000119777	TMEM214	0.674219	0.0475992
ENSG00000141905	NFIC	0.674303	0.0324869
ENSG00000226015	CCT8P1	0.674405	0.0472554
ENSG00000117868	ESYT2	0.674466	0.0468572
ENSG00000123191	ATP7B	0.675771	0.040667
ENSG00000118855	MFSD1	0.676277	0.0484096
ENSG00000250159	AC106791.1	0.676842	0.0466271
ENSG00000121903	ZSCAN20	0.677075	0.0435398
ENSG00000178971	CTC1	0.678022	0.0403901
ENSG00000230530	LIMD1-AS1	0.67838	0.0441862
ENSG00000247317	LY6E-DT	0.679662	0.0452154
ENSG00000163362	INAVA	0.680006	0.0447186
ENSG00000023318	ERP44	0.680802	0.0437832
ENSG00000145685	LHFPL2	0.681033	0.0444205
ENSG00000117877	CD3EAP	0.681913	0.0489485
ENSG00000087008	ACOX3	0.683518	0.0484096
ENSG00000165732	DDX21	0.68363	0.0459331
ENSG00000260088	AL445483.1	1.53824	0.0310148
