# Supplementary material for: clrDV: a differential variability test for RNA-Seq data based on the skew-normal distribution
Source: PeerJ. 2023 Sep 29;11:e16126. doi: 10.7717/peerj.16126 (PMC10544356; doi:10.7717/peerj.16126)
Supplement: Supplemental Information 5 [file peerj-11-16126-s005.xlsx]

## Sheet: PSP Union DV Genes BH
	gene_symbol	SD_ratio	adj_pval	indicator_clrDV	indicator_MDSeq	indicator_gamlss_BH
ENSG00000176165	FOXG1	0.276897	1.22519e-12	1	1	1
ENSG00000198883	PNMA5	0.31994	6.73061e-09	1	1	1
ENSG00000105376	ICAM5	0.325755	2.29884e-09	1	1	1
ENSG00000006116	CACNG3	0.329913	6.73061e-09	1	1	1
ENSG00000214425	LRRC37A4P	0.343209	6.73061e-09	1	1	1
ENSG00000273540	AGBL1	0.345489	2.95225e-08	1	1	1
ENSG00000133101	CCNA1	0.347448	8.50727e-09	1	1	1
ENSG00000138207	RBP4	0.350578	1.93819e-08	1	1	1
ENSG00000147041	SYTL5	0.354343	2.85139e-08	1	1	1
ENSG00000129990	SYT5	0.355912	2.99027e-08	1	1	1
ENSG00000187094	CCK	0.35898	2.85139e-08	1	1	1
ENSG00000129682	FGF13	0.359772	7.34515e-09	1	1	1
ENSG00000236668	AC006450.3	0.36347	2.99027e-08	1	1	1
ENSG00000134343	ANO3	0.364322	1.49855e-08	1	1	1
ENSG00000169884	WNT10B	0.367237	2.99027e-08	1	1	1
ENSG00000181418	DDN	0.369116	2.85139e-08	1	1	1
ENSG00000132026	RTBDN	0.374177	9.12169e-08	1	1	1
ENSG00000131187	F12	0.375593	7.54812e-08	1	1	1
ENSG00000119782	FKBP1B	0.376787	9.12169e-08	1	1	1
ENSG00000239911	PRKAG2-AS1	0.379736	1.68359e-07	1	1	1
ENSG00000113100	CDH9	0.380865	2.02507e-08	1	1	1
ENSG00000178773	CPNE7	0.381171	8.90419e-08	1	1	1
ENSG00000259964	THSD4-AS1	0.381281	7.65038e-08	1	1	1
ENSG00000185149	NPY2R	0.384569	1.22707e-07	1	1	1
ENSG00000178531	CTXN1	0.386453	1.3767e-07	1	1	1
ENSG00000261340	LINC01616	0.386499	1.43109e-07	1	1	1
ENSG00000103528	SYT17	0.387609	2.14228e-07	1	1	1
ENSG00000104888	SLC17A7	0.388539	1.81684e-07	1	1	1
ENSG00000249436	AC008780.2	0.388978	9.12169e-08	1	1	1
ENSG00000164112	TMEM155	0.389528	2.48663e-07	1	1	1
ENSG00000115194	SLC30A3	0.391035	1.3767e-07	1	1	1
ENSG00000154146	NRGN	0.39108	1.43109e-07	1	1	1
ENSG00000129951	PLPPR3	0.391349	2.35458e-07	1	1	1
ENSG00000136535	TBR1	0.391389	9.12169e-08	1	1	1
ENSG00000250579	AC022424.1	0.394037	4.36127e-08	1	1	1
ENSG00000135625	EGR4	0.394091	9.12169e-08	1	1	1
ENSG00000132821	VSTM2L	0.3975	3.10215e-07	1	1	1
ENSG00000186297	GABRA5	0.397573	1.3925e-07	1	1	1
ENSG00000105419	MEIS3	0.397596	2.76882e-07	1	1	1
ENSG00000183654	MARCH11	0.399168	9.12169e-08	1	1	1
ENSG00000255301	AP002893.1	0.400167	3.92096e-07	1	1	1
ENSG00000176956	LY6H	0.400623	2.26104e-07	1	1	1
ENSG00000112183	RBM24	0.403318	4.96487e-07	1	1	1
ENSG00000074317	SNCB	0.403528	4.15827e-07	1	1	1
ENSG00000161082	CELF5	0.403599	3.76739e-07	1	1	1
ENSG00000145451	GLRA3	0.404975	6.51975e-07	1	1	1
ENSG00000171617	ENC1	0.404979	1.81684e-07	1	1	1
ENSG00000169427	KCNK9	0.405453	1.3767e-07	1	1	1
ENSG00000237732	AC010980.1	0.405554	3.76739e-07	1	1	1
ENSG00000233508	AL021395.1	0.40632	2.26104e-07	1	1	1
ENSG00000267034	AC010980.2	0.406732	4.6541e-07	1	1	1
ENSG00000196353	CPNE4	0.407739	3.76739e-07	1	1	1
ENSG00000179388	EGR3	0.408327	3.88226e-07	1	1	1
ENSG00000249550	LINC01234	0.409752	2.33954e-07	1	1	1
ENSG00000150459	SAP18	0.410056	8.72047e-07	1	1	1
ENSG00000008056	SYN1	0.41007	2.25744e-07	1	1	1
ENSG00000223572	CKMT1A	0.410713	7.24321e-07	1	1	1
ENSG00000164794	KCNV1	0.411242	3.37942e-07	1	1	1
ENSG00000159409	CELF3	0.411381	5.80596e-07	1	1	1
ENSG00000182870	GALNT9	0.411776	5.36739e-07	1	1	1
ENSG00000141668	CBLN2	0.413329	9.21117e-07	1	1	1
ENSG00000139200	PIANP	0.41388	1.07456e-06	1	1	1
ENSG00000132639	SNAP25	0.414096	7.18826e-07	1	1	1
ENSG00000183186	C2CD4C	0.415448	5.80596e-07	1	1	1
ENSG00000171450	CDK5R2	0.416474	1.00916e-06	1	1	1
ENSG00000169758	TMEM266	0.417043	3.03843e-07	1	1	1
ENSG00000126733	DACH2	0.417399	3.97425e-07	1	1	1
ENSG00000267890	AC010624.2	0.417798	4.05041e-07	1	1	1
ENSG00000186907	RTN4RL2	0.41824	9.44494e-07	1	1	1
ENSG00000171303	KCNK3	0.418673	6.51975e-07	1	1	1
ENSG00000162706	CADM3	0.418961	1.09667e-06	1	1	1
ENSG00000165983	PTER	0.418996	5.46544e-07	1	1	1
ENSG00000168135	KCNJ4	0.41907	9.44494e-07	1	1	1
ENSG00000103154	NECAB2	0.419076	1.22855e-06	1	1	1
ENSG00000272327	ENSG00000272327	0.419443	1.90899e-06	1	1	1
ENSG00000163032	VSNL1	0.419526	1.31276e-06	1	1	1
ENSG00000188674	C2orf80	0.42026	8.37673e-07	1	1	1
ENSG00000175772	LINC01106	0.420362	9.21117e-07	1	1	1
ENSG00000126583	PRKCG	0.421077	1.50427e-06	1	1	1
ENSG00000223812	AC073365.1	0.421084	1.0406e-06	1	1	1
ENSG00000004848	ARX	0.42113	5.46844e-07	1	1	1
ENSG00000117069	ST6GALNAC5	0.421859	4.15827e-07	1	1	1
ENSG00000259823	LYPD8	0.422556	1.10838e-06	1	1	1
ENSG00000143674	MAP3K21	0.422793	8.95978e-07	1	1	1
ENSG00000225670	CADM3-AS1	0.423082	1.85864e-06	1	1	1
ENSG00000162951	LRRTM1	0.424071	1.58885e-06	1	1	1
ENSG00000279090	AP000843.1	0.424112	1.64254e-06	1	1	1
ENSG00000133019	CHRM3	0.424758	1.08592e-06	1	1	1
ENSG00000260838	AC022893.2	0.425538	4.7535e-06	1	1	1
ENSG00000077152	UBE2T	0.425655	2.42535e-06	1	1	1
ENSG00000166006	KCNC2	0.425792	7.52535e-07	1	1	1
ENSG00000233532	LINC00460	0.425958	1.90944e-06	1	1	1
ENSG00000185290	NUPR2	0.425992	5.9513e-06	1	1	1
ENSG00000110786	PTPN5	0.427456	1.33549e-05	1	1	1
ENSG00000060709	RIMBP2	0.428214	1.29965e-05	1	1	1
ENSG00000144834	TAGLN3	0.428309	5.14226e-06	1	1	1
ENSG00000186377	CYP4X1	0.429148	1.03982e-06	1	1	1
ENSG00000135426	TESPA1	0.42954	8.72047e-07	1	1	1
ENSG00000155511	GRIA1	0.429615	2.0215e-06	1	1	1
ENSG00000106537	TSPAN13	0.429896	1.72984e-06	1	1	1
ENSG00000140284	SLC27A2	0.431203	2.18993e-06	1	1	1
ENSG00000169900	PYDC1	0.431311	4.52908e-06	1	1	1
ENSG00000204950	LRRC10B	0.431693	1.90899e-06	1	1	1
ENSG00000128656	CHN1	0.431714	7.51258e-07	1	1	1
ENSG00000070808	CAMK2A	0.43317	1.21479e-06	1	1	1
ENSG00000010438	PRSS3	0.434106	2.74093e-06	1	1	1
ENSG00000127585	FBXL16	0.434417	1.62277e-06	1	1	1
ENSG00000091137	SLC26A4	0.434526	2.42535e-06	1	1	1
ENSG00000172995	ARPP21	0.434692	1.44424e-06	1	1	1
ENSG00000119866	BCL11A	0.435353	1.90899e-06	1	1	1
ENSG00000119125	GDA	0.435556	1.09325e-06	1	1	1
ENSG00000236268	LINC01361	0.435565	8.75076e-07	1	1	1
ENSG00000172020	GAP43	0.435836	2.3074e-06	1	1	1
ENSG00000272398	CD24	0.436112	1.58885e-06	1	1	1
ENSG00000179673	RPRML	0.436853	5.4727e-06	1	1	1
ENSG00000145632	PLK2	0.4379	3.92825e-06	1	1	1
ENSG00000091664	SLC17A6	0.438064	1.58885e-06	1	1	1
ENSG00000156298	TSPAN7	0.438293	3.87929e-06	1	1	1
ENSG00000117152	RGS4	0.439126	1.85864e-06	1	1	1
ENSG00000228971	AL356479.1	0.439404	1.54263e-06	1	1	1
ENSG00000260500	AC010336.2	0.439478	1.47625e-06	1	1	1
ENSG00000118432	CNR1	0.439856	1.70677e-06	1	1	1
ENSG00000176788	BASP1	0.43992	2.61514e-06	1	1	1
ENSG00000233705	SLC26A4-AS1	0.439973	1.66131e-06	1	1	1
ENSG00000167754	KLK5	0.441158	1.03951e-05	1	1	1
ENSG00000112186	CAP2	0.441501	3.52182e-06	1	1	1
ENSG00000156502	SUPV3L1	0.441753	2.27803e-06	1	1	1
ENSG00000171509	RXFP1	0.442085	1.79154e-06	1	1	1
ENSG00000070729	CNGB1	0.442506	1.08011e-05	1	1	1
ENSG00000248441	LINC01197	0.442507	3.36773e-06	1	1	1
ENSG00000172209	GPR22	0.442581	3.9517e-06	1	1	1
ENSG00000216863	LY86-AS1	0.442913	1.85864e-06	1	1	1
ENSG00000060140	STYK1	0.44346	2.62912e-06	1	1	1
ENSG00000147642	SYBU	0.443816	3.29793e-06	1	1	1
ENSG00000185760	KCNQ5	0.444044	2.30045e-06	1	1	1
ENSG00000173930	SLCO4C1	0.444494	1.90941e-06	1	1	1
ENSG00000133985	TTC9	0.444679	5.12208e-06	1	1	1
ENSG00000077080	ACTL6B	0.445056	5.12208e-06	1	1	1
ENSG00000205035	AC136759.1	0.445513	2.87053e-06	1	1	1
ENSG00000272479	AC010857.1	0.445548	3.52182e-06	1	1	1
ENSG00000024862	CCDC28A	0.445673	2.31831e-06	1	1	1
ENSG00000253368	TRNP1	0.445898	3.94936e-05	1	1	1
ENSG00000230006	ANKRD36BP2	0.445915	1.43175e-05	1	1	1
ENSG00000143340	FAM163A	0.446034	1.03951e-05	1	1	1
ENSG00000184672	RALYL	0.446108	2.61514e-06	1	1	1
ENSG00000260025	AC009414.2	0.44649	1.94493e-06	1	1	1
ENSG00000169744	LDB2	0.446834	2.37925e-06	1	1	1
ENSG00000102468	HTR2A	0.447027	5.15649e-06	1	1	1
ENSG00000105202	FBL	0.447114	5.86483e-06	1	1	1
ENSG00000228620	Z97056.1	0.447576	6.09838e-06	1	0	1
ENSG00000133169	BEX1	0.448478	9.72266e-06	1	1	1
ENSG00000196557	CACNA1H	0.448553	5.23737e-06	1	1	1
ENSG00000198108	CHSY3	0.44857	6.59241e-06	1	1	1
ENSG00000184185	KCNJ12	0.448653	1.00916e-06	1	1	1
ENSG00000109158	GABRA4	0.449019	7.24034e-06	1	1	1
ENSG00000273419	AC004877.1	0.449453	2.40352e-06	1	1	1
ENSG00000130032	PRRG3	0.449612	3.52227e-06	1	1	1
ENSG00000136928	GABBR2	0.449806	5.14218e-06	1	1	1
ENSG00000054803	CBLN4	0.449982	4.25649e-06	1	1	1
ENSG00000214842	RAD51AP2	0.45021	4.60664e-06	1	0	1
ENSG00000157214	STEAP2	0.450374	1.71862e-06	1	1	1
ENSG00000267448	AC010649.1	0.450484	3.13963e-06	1	1	1
ENSG00000168748	CA7	0.450914	2.95368e-06	1	1	1
ENSG00000156140	ADAMTS3	0.450921	3.52182e-06	1	1	1
ENSG00000164604	GPR85	0.451433	2.40352e-06	1	1	1
ENSG00000148798	INA	0.451442	6.22578e-06	1	1	1
ENSG00000165995	CACNB2	0.451445	3.8153e-06	1	1	1
ENSG00000123977	DAW1	0.451819	7.63905e-06	1	1	1
ENSG00000240204	SMKR1	0.45225	1.38294e-05	1	1	1
ENSG00000132535	DLG4	0.452359	7.61303e-06	1	1	1
ENSG00000154096	THY1	0.452618	7.7869e-06	1	1	1
ENSG00000124203	ZNF831	0.452698	9.38229e-06	1	1	1
ENSG00000260412	AL353746.1	0.452911	5.12208e-06	1	1	1
ENSG00000265579	AC023301.1	0.453149	3.07584e-06	1	1	1
ENSG00000182674	KCNB2	0.4533	4.66216e-06	1	1	1
ENSG00000263878	DLGAP1-AS4	0.453549	6.55155e-06	1	1	1
ENSG00000130643	CALY	0.453869	6.41001e-06	1	1	1
ENSG00000242428	C3orf67-AS1	0.453981	4.76029e-06	1	1	1
ENSG00000167550	RHEBL1	0.454211	1.36857e-05	1	1	1
ENSG00000086300	SNX10	0.454883	8.15355e-06	1	1	1
ENSG00000124249	KCNK15	0.455786	3.85269e-06	1	1	1
ENSG00000110148	CCKBR	0.455948	9.67162e-06	1	1	1
ENSG00000135333	EPHA7	0.455969	9.53795e-06	1	1	1
ENSG00000084072	PPIE	0.456487	1.01362e-05	1	1	1
ENSG00000121769	FABP3	0.456515	1.12786e-05	1	1	1
ENSG00000260001	TGFBR3L	0.456639	7.61303e-06	1	1	1
ENSG00000139988	RDH12	0.456858	7.82365e-06	1	1	1
ENSG00000273301	AC016717.2	0.45731	4.30079e-06	1	1	1
ENSG00000007264	MATK	0.457696	6.09838e-06	1	1	1
ENSG00000167535	CACNB3	0.457768	6.55155e-06	1	1	1
ENSG00000170396	ZNF804A	0.457826	1.10298e-05	1	1	1
ENSG00000233542	AL391845.2	0.458245	2.66162e-06	1	1	1
ENSG00000171126	KCNG3	0.458461	1.37153e-05	1	1	1
ENSG00000156642	NPTN	0.458537	9.38229e-06	1	1	1
ENSG00000213190	MLLT11	0.458749	1.08011e-05	1	1	1
ENSG00000166073	GPR176	0.458782	9.67162e-06	1	1	1
ENSG00000254377	MIR124-2HG	0.459034	5.86483e-06	1	1	1
ENSG00000224223	VSTM2A-OT1	0.459039	1.0371e-05	1	1	1
ENSG00000087460	GNAS	0.459611	1.03173e-05	1	0	1
ENSG00000272636	DOC2B	0.459934	6.09838e-06	1	1	1
ENSG00000152822	GRM1	0.460324	1.09415e-05	1	1	1
ENSG00000260196	AC124798.1	0.460336	3.61596e-06	1	1	1
ENSG00000226852	ENSG00000226852	0.460493	3.83649e-05	1	1	1
ENSG00000150054	MPP7	0.460586	1.18492e-05	1	1	1
ENSG00000135439	AGAP2	0.460608	5.46083e-06	1	1	1
ENSG00000127561	SYNGR3	0.460657	9.5742e-06	1	1	1
ENSG00000092051	JPH4	0.460671	9.17308e-06	1	1	1
ENSG00000260941	LINC00622	0.460809	2.09884e-05	1	1	1
ENSG00000147676	MAL2	0.46107	8.15355e-06	1	1	1
ENSG00000138944	SHISAL1	0.461346	3.58779e-06	1	1	1
ENSG00000179774	ATOH7	0.461357	8.13274e-06	1	1	1
ENSG00000164128	NPY1R	0.461607	1.04117e-05	1	1	1
ENSG00000196639	HRH1	0.46173	1.71954e-05	1	1	1
ENSG00000163618	CADPS	0.461915	1.81251e-05	1	1	1
ENSG00000115756	HPCAL1	0.461922	2.81898e-06	1	1	1
ENSG00000196368	NUDT11	0.462235	9.5742e-06	1	1	1
ENSG00000125170	DOK4	0.462464	5.68563e-06	1	1	1
ENSG00000059915	PSD	0.462548	1.24364e-05	1	1	1
ENSG00000167642	SPINT2	0.462885	2.00773e-05	1	1	1
ENSG00000047849	MAP4	0.462965	1.09415e-05	1	1	1
ENSG00000214944	ARHGEF28	0.462977	2.34559e-05	1	1	1
ENSG00000221823	PPP3R1	0.464191	4.05066e-05	1	1	1
ENSG00000158747	NBL1	0.464244	1.23282e-05	1	1	1
ENSG00000141655	TNFRSF11A	0.46432	6.55155e-06	1	1	1
ENSG00000174521	TTC9B	0.46445	7.7869e-06	1	1	1
ENSG00000135638	EMX1	0.464731	6.55155e-06	1	1	1
ENSG00000173267	SNCG	0.464824	1.97887e-05	1	1	1
ENSG00000165379	LRFN5	0.465013	8.91191e-06	1	1	1
ENSG00000171532	NEUROD2	0.465022	8.11423e-06	1	1	1
ENSG00000066248	NGEF	0.465122	1.20137e-05	1	1	1
ENSG00000134369	NAV1	0.465339	2.37314e-06	1	1	1
ENSG00000070501	POLB	0.465484	7.61303e-06	1	1	1
ENSG00000135519	KCNH3	0.465817	7.63905e-06	1	1	1
ENSG00000279496	ENSG00000279496	0.465963	1.23222e-05	1	1	1
ENSG00000253633	AP002852.1	0.46626	1.09415e-05	1	1	1
ENSG00000029153	ARNTL2	0.466339	1.81956e-05	1	1	1
ENSG00000167281	RBFOX3	0.466586	1.10298e-05	1	1	1
ENSG00000142549	IGLON5	0.467126	4.8401e-06	1	1	1
ENSG00000186469	GNG2	0.467289	5.8749e-06	1	1	1
ENSG00000272321	AP003355.2	0.467322	6.09838e-06	1	1	1
ENSG00000276462	BX255923.2	0.467413	1.3383e-05	1	1	1
ENSG00000154277	UCHL1	0.467758	2.16802e-05	1	1	1
ENSG00000183578	TNFAIP8L3	0.46776	2.04989e-05	1	1	1
ENSG00000011638	TMEM159	0.467819	0.000102758	1	1	1
ENSG00000196872	KIAA1211L	0.468311	1.03572e-05	1	1	1
ENSG00000067715	SYT1	0.468438	1.56374e-05	1	1	1
ENSG00000174951	FUT1	0.46859	1.04054e-05	1	1	1
ENSG00000180777	ANKRD30B	0.468668	3.4517e-05	1	1	1
ENSG00000273238	AC116565.1	0.46877	1.33549e-05	1	1	1
ENSG00000136267	DGKB	0.468933	3.76552e-05	1	1	1
ENSG00000168539	CHRM1	0.468942	1.7179e-05	1	1	1
ENSG00000174871	CNIH2	0.468997	1.4772e-05	1	1	1
ENSG00000155966	AFF2	0.469019	1.70231e-05	1	1	1
ENSG00000174145	NWD2	0.469221	1.9234e-05	1	1	1
ENSG00000117600	PLPPR4	0.469242	1.52054e-05	1	1	1
ENSG00000179841	AKAP5	0.469409	1.59058e-05	1	1	1
ENSG00000279322	AL035252.4	0.469501	3.30919e-06	1	1	1
ENSG00000257434	AC073525.1	0.469671	9.71993e-06	1	1	1
ENSG00000161647	MPP3	0.469707	7.63905e-06	1	1	1
ENSG00000105696	TMEM59L	0.470067	1.97712e-05	1	1	1
ENSG00000011677	GABRA3	0.470268	1.74985e-05	1	1	1
ENSG00000170214	ADRA1B	0.470278	1.23282e-05	1	1	1
ENSG00000163630	SYNPR	0.470433	1.23222e-05	1	1	1
ENSG00000077044	DGKD	0.470753	2.09287e-05	1	1	1
ENSG00000189181	OR14I1	0.470923	4.8483e-05	1	1	1
ENSG00000011083	SLC6A7	0.471118	1.37153e-05	1	1	1
ENSG00000104435	STMN2	0.471147	1.46037e-05	1	1	1
ENSG00000145920	CPLX2	0.471761	1.42905e-05	1	1	1
ENSG00000077264	PAK3	0.471812	1.65633e-05	1	1	1
ENSG00000166448	TMEM130	0.472077	1.85584e-05	1	1	1
ENSG00000107954	NEURL1	0.47221	1.65783e-05	1	1	1
ENSG00000179520	SLC17A8	0.472305	1.74393e-05	1	1	1
ENSG00000177679	SRRM3	0.472555	7.86103e-06	1	1	1
ENSG00000272551	AC017048.3	0.472784	1.44824e-05	1	1	1
ENSG00000203618	GP1BB	0.472896	8.91191e-06	1	1	1
ENSG00000152503	TRIM36	0.472937	1.81952e-05	1	1	1
ENSG00000165704	HPRT1	0.473013	2.00773e-05	1	1	1
ENSG00000182901	RGS7	0.473175	1.43175e-05	1	1	1
ENSG00000178860	MSC	0.473225	2.3001e-05	1	1	1
ENSG00000136158	SPRY2	0.473329	9.67162e-06	1	1	1
ENSG00000180332	KCTD4	0.473445	2.56817e-05	1	1	1
ENSG00000272157	AC107373.2	0.473883	1.31349e-05	1	1	1
ENSG00000170419	VSTM2A	0.474033	1.85517e-05	1	1	1
ENSG00000134072	CAMK1	0.474144	2.33991e-05	1	1	1
ENSG00000107518	ATRNL1	0.474161	0.000103734	1	1	1
ENSG00000186960	LINC01551	0.474513	1.3383e-05	1	1	1
ENSG00000106367	AP1S1	0.474563	7.15901e-06	1	1	1
ENSG00000145864	GABRB2	0.474711	2.9017e-05	1	1	1
ENSG00000187730	GABRD	0.475036	1.41934e-05	1	1	1
ENSG00000170091	NSG2	0.475072	1.99234e-05	1	1	1
ENSG00000086506	HBQ1	0.47525	1.4772e-05	1	1	1
ENSG00000104044	OCA2	0.475464	2.14991e-05	1	1	1
ENSG00000259834	AL365361.1	0.475875	1.88762e-05	1	1	1
ENSG00000182566	CLEC4G	0.476052	1.26899e-05	1	1	1
ENSG00000225953	SATB2-AS1	0.476233	1.75974e-05	1	1	1
ENSG00000070159	PTPN3	0.476432	1.792e-05	1	1	1
ENSG00000095752	IL11	0.476496	9.38229e-06	1	1	1
ENSG00000101188	NTSR1	0.476673	1.88649e-05	1	1	1
ENSG00000183576	SETD3	0.476731	2.00773e-05	1	1	1
ENSG00000102003	SYP	0.476816	3.89335e-05	1	1	1
ENSG00000104679	R3HCC1	0.477369	2.96533e-05	1	1	1
ENSG00000136238	RAC1	0.477524	3.50376e-05	1	1	1
ENSG00000136153	LMO7	0.477567	1.08011e-05	1	1	1
ENSG00000174482	LINGO2	0.478104	6.98299e-06	1	1	1
ENSG00000260391	AC022336.2	0.478147	8.70335e-05	1	1	1
ENSG00000003756	RBM5	0.478175	6.55155e-06	1	1	1
ENSG00000149972	CNTN5	0.478383	2.39966e-05	1	1	1
ENSG00000117598	PLPPR5	0.478385	2.18169e-05	1	1	1
ENSG00000157152	SYN2	0.478833	2.79783e-05	1	1	1
ENSG00000278978	AC092611.3	0.478867	5.17179e-06	1	1	1
ENSG00000237187	NR2F1-AS1	0.479083	2.98638e-05	1	1	1
ENSG00000114423	CBLB	0.479114	2.70642e-05	1	1	1
ENSG00000196730	DAPK1	0.479146	2.34559e-05	1	1	1
ENSG00000186010	NDUFA13	0.479186	4.8483e-05	1	1	1
ENSG00000263873	AP003396.5	0.479242	3.65492e-05	1	1	1
ENSG00000258757	AL133453.1	0.479367	3.4517e-05	1	1	1
ENSG00000101210	EEF1A2	0.479862	1.74985e-05	1	1	1
ENSG00000105143	SLC1A6	0.480397	2.27165e-05	1	1	1
ENSG00000166596	CFAP52	0.48056	3.48832e-05	1	1	1
ENSG00000134709	HOOK1	0.480694	3.55353e-05	1	1	1
ENSG00000198598	MMP17	0.480938	1.37153e-05	1	1	1
ENSG00000166526	ZNF3	0.480964	4.8277e-05	1	1	1
ENSG00000091592	NLRP1	0.481016	3.42717e-05	1	1	1
ENSG00000237289	CKMT1B	0.481285	1.84669e-05	1	1	1
ENSG00000187109	NAP1L1	0.481316	3.40697e-05	1	1	1
ENSG00000250366	TUNAR	0.481449	2.53871e-05	1	1	1
ENSG00000112053	SLC26A8	0.481506	1.94956e-05	1	1	1
ENSG00000106976	DNM1	0.481672	2.20489e-05	1	1	1
ENSG00000160408	ST6GALNAC6	0.481728	1.10298e-05	1	1	1
ENSG00000144331	ZNF385B	0.481837	3.76552e-05	1	1	1
ENSG00000159335	PTMS	0.481875	1.3739e-05	1	1	1
ENSG00000132849	PATJ	0.481899	1.65633e-05	1	1	1
ENSG00000049759	NEDD4L	0.482094	3.46988e-05	1	1	1
ENSG00000270111	AL583859.2	0.482182	5.26192e-05	1	1	1
ENSG00000138100	TRIM54	0.48263	2.2461e-05	1	1	1
ENSG00000165186	PTCHD1	0.482664	9.38229e-06	1	1	1
ENSG00000129911	KLF16	0.482714	1.4355e-05	1	1	1
ENSG00000022355	GABRA1	0.482728	3.83649e-05	1	1	1
ENSG00000124140	SLC12A5	0.482965	5.47487e-05	1	1	1
ENSG00000237522	NONOP2	0.483099	1.99234e-05	1	1	1
ENSG00000235026	DPP10-AS1	0.483121	3.75444e-05	1	1	1
ENSG00000184900	SUMO3	0.483352	7.7869e-06	1	1	1
ENSG00000272515	AL355578.1	0.483417	3.47567e-05	1	1	1
ENSG00000146374	RSPO3	0.484005	4.89843e-05	1	0	1
ENSG00000185070	FLRT2	0.48402	0.000273627	1	1	1
ENSG00000162374	ELAVL4	0.484212	1.8883e-05	1	1	1
ENSG00000117650	NEK2	0.484235	7.42632e-05	1	1	1
ENSG00000149742	SLC22A9	0.484305	2.70059e-05	1	1	1
ENSG00000188573	FBLL1	0.484346	7.05225e-05	1	1	1
ENSG00000054277	OPN3	0.484374	0.000134896	1	1	1
ENSG00000133665	DYDC2	0.484437	3.47567e-05	1	1	1
ENSG00000128245	YWHAH	0.48474	4.89659e-05	1	1	1
ENSG00000259168	AC104002.3	0.485424	4.15935e-05	1	1	1
ENSG00000107829	FBXW4	0.485507	4.8483e-05	1	1	1
ENSG00000156299	TIAM1	0.485555	1.78014e-05	1	1	1
ENSG00000114948	ADAM23	0.485579	5.0012e-05	1	1	1
ENSG00000182230	FAM153B	0.485639	2.56817e-05	1	1	1
ENSG00000124493	GRM4	0.485665	8.15355e-06	1	1	1
ENSG00000186462	NAP1L2	0.485751	2.70642e-05	1	1	1
ENSG00000136546	SCN7A	0.48589	1.42905e-05	1	1	1
ENSG00000178965	ERICH3	0.48596	3.5221e-05	1	1	1
ENSG00000176204	LRRTM4	0.486373	6.33913e-05	1	1	1
ENSG00000188582	PAQR9	0.486651	5.27146e-05	1	1	1
ENSG00000196376	SLC35F1	0.486652	3.7505e-05	1	1	1
ENSG00000184702	SEPT5	0.486728	3.79965e-05	1	1	1
ENSG00000215218	UBE2QL1	0.486737	2.73656e-05	1	1	1
ENSG00000164828	SUN1	0.486976	1.81952e-05	1	1	1
ENSG00000165434	PGM2L1	0.486985	0.000279341	1	1	1
ENSG00000279042	AP005242.4	0.486996	4.2293e-05	1	0	1
ENSG00000151229	SLC2A13	0.487054	9.0482e-05	1	1	1
ENSG00000205531	NAP1L4	0.487289	3.80186e-05	1	1	1
ENSG00000163827	LRRC2	0.487419	7.60304e-05	1	1	1
ENSG00000245910	SNHG6	0.487957	2.4576e-05	1	1	1
ENSG00000172301	COPRS	0.488049	7.87975e-06	1	1	1
ENSG00000181004	BBS12	0.488208	2.73656e-05	1	1	1
ENSG00000117245	KIF17	0.488473	1.7179e-05	1	1	1
ENSG00000157219	HTR5A	0.488743	1.53629e-05	1	1	1
ENSG00000116299	KIAA1324	0.488743	5.15887e-05	1	1	1
ENSG00000102387	TAF7L	0.488831	4.27906e-05	1	1	1
ENSG00000168490	PHYHIP	0.488865	4.8483e-05	1	1	1
ENSG00000132323	ILKAP	0.48897	4.8483e-05	1	1	1
ENSG00000198010	DLGAP2	0.48897	1.77203e-05	1	1	1
ENSG00000118733	OLFM3	0.489026	5.23744e-05	1	1	1
ENSG00000261728	AL138690.1	0.48904	3.44443e-05	1	1	1
ENSG00000089199	CHGB	0.489106	5.88012e-05	1	1	1
ENSG00000179148	ALOXE3	0.489122	3.57963e-05	1	1	1
ENSG00000163624	CDS1	0.489184	4.27906e-05	1	1	1
ENSG00000011105	TSPAN9	0.489276	2.53982e-05	1	1	1
ENSG00000188186	LAMTOR4	0.48932	2.96142e-05	1	1	1
ENSG00000145592	RPL37	0.489351	2.79783e-05	1	1	1
ENSG00000185742	C11orf87	0.48948	6.12243e-05	1	1	1
ENSG00000183662	FAM19A1	0.489541	4.95558e-05	1	1	1
ENSG00000140280	LYSMD2	0.489596	4.95558e-05	1	1	1
ENSG00000100604	CHGA	0.489647	4.19923e-05	1	1	1
ENSG00000249992	TMEM158	0.489837	3.00698e-05	1	1	1
ENSG00000180720	CHRM4	0.489877	4.1657e-05	1	1	1
ENSG00000169020	ATP5ME	0.489921	4.69905e-05	1	1	1
ENSG00000129355	CDKN2D	0.490138	9.48397e-05	1	1	1
ENSG00000105258	POLR2I	0.490193	0.000114279	1	1	1
ENSG00000081189	MEF2C	0.490269	0.000522247	1	1	1
ENSG00000169035	KLK7	0.490285	3.99132e-05	1	1	1
ENSG00000084764	MAPRE3	0.490454	1.81251e-05	1	1	1
ENSG00000166736	HTR3A	0.490492	3.56359e-05	1	1	1
ENSG00000130558	OLFM1	0.490582	5.0012e-05	1	1	1
ENSG00000176749	CDK5R1	0.490672	4.04486e-05	1	1	1
ENSG00000107105	ELAVL2	0.490773	1.62525e-05	1	1	1
ENSG00000184368	MAP7D2	0.490791	6.12243e-05	1	1	1
ENSG00000182255	KCNA4	0.49096	3.34774e-05	1	1	1
ENSG00000103316	CRYM	0.491026	6.06997e-05	1	1	1
ENSG00000145428	RNF175	0.491134	6.33142e-05	1	1	1
ENSG00000164076	CAMKV	0.491143	4.27738e-05	1	1	1
ENSG00000136883	KIF12	0.491409	4.50598e-05	1	1	1
ENSG00000144583	MARCH4	0.491444	3.87113e-05	1	1	1
ENSG00000011347	SYT7	0.491528	3.79965e-05	1	1	1
ENSG00000169122	FAM110B	0.491603	2.90025e-05	1	1	1
ENSG00000157212	PAXIP1	0.491621	3.54167e-05	1	1	1
ENSG00000106689	LHX2	0.491822	3.76418e-05	1	1	1
ENSG00000268565	AC005339.1	0.491933	2.56817e-05	1	1	1
ENSG00000134744	ZCCHC11	0.492155	1.38744e-05	1	1	1
ENSG00000065609	SNAP91	0.49229	3.77459e-05	1	1	1
ENSG00000125817	CENPB	0.492303	2.07109e-05	1	1	1
ENSG00000224982	TMEM233	0.492391	4.8483e-05	1	0	1
ENSG00000228824	MIR4500HG	0.492469	6.07112e-05	1	1	1
ENSG00000169851	PCDH7	0.492527	6.81596e-05	1	1	1
ENSG00000182450	KCNK4	0.492652	4.8483e-05	1	1	1
ENSG00000189159	JPT1	0.492867	5.0012e-05	1	1	1
ENSG00000074803	SLC12A1	0.492913	6.77722e-05	1	1	1
ENSG00000181195	PENK	0.493102	1.53077e-05	1	1	1
ENSG00000235711	ANKRD34C	0.493538	5.15887e-05	1	1	1
ENSG00000129295	LRRC6	0.493604	9.38396e-05	1	1	1
ENSG00000168214	RBPJ	0.493832	7.14067e-05	1	1	1
ENSG00000166342	NETO1	0.494172	6.92461e-05	1	1	1
ENSG00000157005	SST	0.49418	8.99983e-05	1	1	1
ENSG00000259948	AC124068.1	0.494213	5.0012e-05	1	1	1
ENSG00000160963	COL26A1	0.494451	4.47783e-05	1	1	1
ENSG00000125966	MMP24	0.49451	3.13302e-05	1	1	1
ENSG00000105409	ATP1A3	0.494519	7.79215e-05	1	1	1
ENSG00000136819	C9orf78	0.494606	0.000225505	1	1	1
ENSG00000185352	HS6ST3	0.494739	6.26856e-05	1	1	1
ENSG00000169676	DRD5	0.49498	7.74832e-05	1	1	1
ENSG00000131788	PIAS3	0.495056	1.88762e-05	1	1	1
ENSG00000107295	SH3GL2	0.495505	4.59641e-05	1	1	1
ENSG00000186310	NAP1L3	0.495698	6.40446e-05	1	1	1
ENSG00000138741	TRPC3	0.495703	4.69905e-05	1	1	1
ENSG00000205659	LIN52	0.4958	3.56359e-05	1	1	1
ENSG00000164647	STEAP1	0.49582	3.28468e-05	1	1	1
ENSG00000213088	ACKR1	0.49585	1.70231e-05	1	1	1
ENSG00000082556	OPRK1	0.4961	5.92626e-05	1	1	1
ENSG00000278456	AC015712.7	0.496357	5.92718e-05	1	1	1
ENSG00000091129	NRCAM	0.496372	0.000154282	1	1	1
ENSG00000185924	RTN4RL1	0.496381	4.59641e-05	1	1	1
ENSG00000034510	TMSB10	0.496877	2.98344e-05	1	1	1
ENSG00000066032	CTNNA2	0.496931	7.41393e-05	1	1	1
ENSG00000120942	UBIAD1	0.497187	1.45041e-05	1	1	1
ENSG00000164588	HCN1	0.497281	7.86047e-05	1	1	1
ENSG00000198910	L1CAM	0.49733	6.37149e-05	1	1	1
ENSG00000019505	SYT13	0.497342	5.25322e-05	1	1	1
ENSG00000177542	SLC25A22	0.497422	8.8784e-05	1	1	1
ENSG00000102678	FGF9	0.49745	6.63686e-05	1	1	1
ENSG00000187672	ERC2	0.497454	7.43914e-05	1	1	1
ENSG00000178171	AMER3	0.497498	6.65688e-05	1	1	1
ENSG00000162817	C1orf115	0.49774	7.70015e-05	1	1	1
ENSG00000011478	QPCTL	0.497768	2.41216e-05	1	1	1
ENSG00000053372	MRTO4	0.497957	2.94184e-05	1	1	1
ENSG00000267466	AC021683.1	0.498095	5.86503e-05	1	0	1
ENSG00000145545	SRD5A1	0.498123	0.000159155	1	1	1
ENSG00000176769	TCERG1L	0.498351	7.12127e-05	1	1	1
ENSG00000147432	CHRNB3	0.498412	1.79234e-05	1	1	1
ENSG00000277586	NEFL	0.498534	0.000801529	1	1	1
ENSG00000174808	BTC	0.498629	3.34397e-05	1	1	1
ENSG00000267561	AC093155.3	0.498918	9.08308e-05	1	1	1
ENSG00000182010	RTKN2	0.498981	7.14663e-05	1	1	1
ENSG00000122824	NUDT10	0.499164	4.02352e-05	1	1	1
ENSG00000175264	CHST1	0.499197	4.95558e-05	1	1	1
ENSG00000157168	NRG1	0.499384	2.72864e-05	1	1	1
ENSG00000106089	STX1A	0.499424	8.93337e-05	1	1	1
ENSG00000146360	GPR6	0.499434	6.98088e-05	1	0	1
ENSG00000169258	GPRIN1	0.499677	6.96537e-05	1	1	1
ENSG00000008118	CAMK1G	0.499751	5.85131e-05	1	1	1
ENSG00000157368	IL34	0.499769	4.13013e-05	1	1	1
ENSG00000152128	TMEM163	0.499937	2.77523e-05	1	1	1
ENSG00000188191	PRKAR1B	0.499965	0.000108733	1	1	1
ENSG00000236064	AL034399.2	0.500035	9.08308e-05	1	1	1
ENSG00000177879	AP3S1	0.500125	0.000114276	1	1	1
ENSG00000203280	AL022323.1	0.500157	0.000111152	1	1	1
ENSG00000184613	NELL2	0.500333	0.000110373	1	1	1
ENSG00000047249	ATP6V1H	0.500446	0.000114274	1	1	1
ENSG00000165349	SLC7A3	0.500736	0.00012613	1	1	1
ENSG00000170275	CRTAP	0.50089	8.54986e-05	1	1	1
ENSG00000149054	ZNF215	0.501006	5.0012e-05	1	1	1
ENSG00000186732	MPPED1	0.501026	5.91513e-05	1	1	1
ENSG00000184845	DRD1	0.501119	6.33142e-05	1	1	1
ENSG00000113327	GABRG2	0.501187	6.86922e-05	1	1	1
ENSG00000121905	HPCA	0.501203	8.15895e-05	1	1	1
ENSG00000173598	NUDT4	0.501459	0.000159809	1	1	1
ENSG00000130368	MAS1	0.501518	9.4585e-05	1	1	1
ENSG00000260711	AL121839.2	0.50153	6.81596e-05	1	1	1
ENSG00000172031	EPHX4	0.50158	7.80727e-05	1	1	1
ENSG00000173114	LRRN3	0.501584	0.000150491	1	1	1
ENSG00000184156	KCNQ3	0.501735	6.40446e-05	1	1	1
ENSG00000081138	CDH7	0.50175	0.000109873	1	1	1
ENSG00000172602	RND1	0.501865	4.02352e-05	1	1	1
ENSG00000083896	YTHDC1	0.501956	4.29067e-05	1	1	1
ENSG00000179542	SLITRK4	0.501958	0.000102758	1	1	1
ENSG00000072201	LNX1	0.502062	0.000136238	1	1	1
ENSG00000135482	ZC3H10	0.502111	8.99983e-05	1	1	1
ENSG00000135925	WNT10A	0.50231	7.56928e-05	1	1	1
ENSG00000034239	EFCAB1	0.502322	3.58553e-05	1	1	1
ENSG00000250305	TRMT9B	0.502505	4.95558e-05	1	1	1
ENSG00000166206	GABRB3	0.502549	7.86047e-05	1	1	1
ENSG00000116251	RPL22	0.502574	8.18367e-05	1	1	1
ENSG00000166257	SCN3B	0.502639	0.000134992	1	1	1
ENSG00000144290	SLC4A10	0.502819	0.000107494	1	1	1
ENSG00000152932	RAB3C	0.50307	0.000131658	1	1	1
ENSG00000164129	NPY5R	0.503084	7.7237e-05	1	1	1
ENSG00000175906	ARL4D	0.503096	0.000210893	1	1	1
ENSG00000118160	SLC8A2	0.503337	9.34478e-05	1	1	1
ENSG00000172247	C1QTNF4	0.503412	8.18367e-05	1	1	1
ENSG00000129596	CDO1	0.503546	0.000101364	1	1	1
ENSG00000155158	TTC39B	0.503597	3.88796e-05	1	1	1
ENSG00000188011	RTP5	0.503604	1.88762e-05	1	1	1
ENSG00000041353	RAB27B	0.503675	0.000129001	1	1	1
ENSG00000184388	PABPC1L2B	0.504073	4.8483e-05	1	1	1
ENSG00000165282	PIGO	0.50411	2.09884e-05	1	1	1
ENSG00000135454	B4GALNT1	0.504171	7.80535e-05	1	1	1
ENSG00000146147	MLIP	0.504471	0.000108733	1	1	1
ENSG00000180044	C3orf80	0.504759	0.000142436	1	1	1
ENSG00000214694	ARHGEF33	0.504957	6.20577e-05	1	1	1
ENSG00000135423	GLS2	0.505265	0.000100327	1	1	1
ENSG00000149927	DOC2A	0.505283	0.000112513	1	1	1
ENSG00000166171	DPCD	0.505332	6.98088e-05	1	1	1
ENSG00000175874	CREG2	0.50534	7.19808e-05	1	1	1
ENSG00000168653	NDUFS5	0.5054	9.08256e-05	1	1	1
ENSG00000144868	TMEM108	0.505415	0.000152856	1	1	1
ENSG00000100628	ASB2	0.505448	7.80727e-05	1	1	1
ENSG00000175606	TMEM70	0.505563	0.00026533	1	1	1
ENSG00000125851	PCSK2	0.505603	0.000124947	1	1	1
ENSG00000123496	IL13RA2	0.505604	0.000123625	1	1	1
ENSG00000101489	CELF4	0.505662	5.69384e-05	1	1	1
ENSG00000235531	MSC-AS1	0.505694	8.83254e-05	1	1	1
ENSG00000169220	RGS14	0.506021	9.20195e-05	1	1	1
ENSG00000122574	WIPF3	0.506058	0.000205975	1	1	1
ENSG00000139211	AMIGO2	0.506155	4.8483e-05	1	1	1
ENSG00000170540	ARL6IP1	0.506222	0.000189811	1	1	1
ENSG00000050628	PTGER3	0.506383	0.00017018	1	0	1
ENSG00000143947	RPS27A	0.506398	0.000107494	1	1	1
ENSG00000008083	JARID2	0.506508	8.18127e-05	1	1	1
ENSG00000185737	NRG3	0.506542	0.000101364	1	1	1
ENSG00000235280	MCF2L-AS1	0.506569	6.20577e-05	1	1	1
ENSG00000047936	ROS1	0.506662	0.000179457	1	1	1
ENSG00000225206	MIR137HG	0.506745	5.15887e-05	1	0	1
ENSG00000121104	FAM117A	0.506772	3.84122e-05	1	1	1
ENSG00000170579	DLGAP1	0.506941	0.000112287	1	1	1
ENSG00000174473	GALNTL6	0.507148	8.99983e-05	1	1	1
ENSG00000180660	MAB21L1	0.507246	4.57873e-05	1	1	1
ENSG00000232220	AC008440.2	0.507297	0.000102758	1	1	1
ENSG00000113805	CNTN3	0.507349	0.000145837	1	1	1
ENSG00000111913	RIPOR2	0.507359	0.000102758	1	1	1
ENSG00000132872	SYT4	0.507402	0.000126311	1	1	1
ENSG00000101349	PAK5	0.507491	0.000100914	1	1	1
ENSG00000116329	OPRD1	0.507553	8.73358e-05	1	0	1
ENSG00000117691	NENF	0.507641	0.000182464	1	1	1
ENSG00000127603	MACF1	0.507683	0.000658226	1	1	1
ENSG00000070193	FGF10	0.507905	0.000222974	1	1	1
ENSG00000196465	MYL6B	0.50791	6.3206e-05	1	1	1
ENSG00000100276	RASL10A	0.50799	6.87775e-05	1	1	1
ENSG00000204387	C6orf48	0.508241	0.00016144	1	1	1
ENSG00000186642	PDE2A	0.508248	0.000111956	1	1	1
ENSG00000132563	REEP2	0.508324	5.296e-05	1	1	1
ENSG00000144959	NCEH1	0.508439	5.04798e-05	1	1	1
ENSG00000131626	PPFIA1	0.508463	0.000157434	1	1	1
ENSG00000180440	SERTM1	0.50854	0.000107494	1	1	1
ENSG00000177511	ST8SIA3	0.508584	9.52592e-05	1	1	1
ENSG00000235118	FAM237A	0.508624	8.18367e-05	1	0	1
ENSG00000105649	RAB3A	0.508642	0.00022949	1	1	1
ENSG00000109738	GLRB	0.508664	6.87775e-05	1	1	1
ENSG00000175471	MCTP1	0.508771	0.00021082	1	1	1
ENSG00000160293	VAV2	0.508807	3.56359e-05	1	1	1
ENSG00000144619	CNTN4	0.50881	0.000157434	1	1	1
ENSG00000248485	PCP4L1	0.508932	0.000133419	1	1	1
ENSG00000152556	PFKM	0.509066	0.000114696	1	1	1
ENSG00000130540	SULT4A1	0.509141	6.89062e-05	1	1	1
ENSG00000118194	TNNT2	0.509193	8.57219e-05	1	1	1
ENSG00000108684	ASIC2	0.509284	0.000107494	1	1	1
ENSG00000069424	KCNAB2	0.509352	7.14663e-05	1	1	1
ENSG00000205279	CTXN3	0.509453	6.98088e-05	1	1	1
ENSG00000185386	MAPK11	0.509491	4.65008e-05	1	1	1
ENSG00000259946	BX005019.1	0.50951	0.000114276	1	1	1
ENSG00000134940	ACRV1	0.509553	0.000113633	1	1	1
ENSG00000132749	TESMIN	0.509567	0.000125446	1	1	1
ENSG00000117114	ADGRL2	0.509691	9.6201e-05	1	1	1
ENSG00000172985	SH3RF3	0.509761	6.77691e-05	1	1	1
ENSG00000162975	KCNF1	0.509814	0.000154699	1	1	1
ENSG00000114956	DGUOK	0.509886	0.000392791	1	1	1
ENSG00000072832	CRMP1	0.509967	0.000188022	1	1	1
ENSG00000115419	GLS	0.510276	0.00011484	1	1	1
ENSG00000078328	RBFOX1	0.510304	6.31068e-05	1	1	1
ENSG00000197756	RPL37A	0.510476	0.000110373	1	1	1
ENSG00000100564	PIGH	0.510526	0.000114279	1	1	1
ENSG00000167178	ISLR2	0.510588	9.08308e-05	1	1	1
ENSG00000152954	NRSN1	0.510637	0.000120391	1	1	1
ENSG00000167196	FBXO22	0.510671	4.29998e-05	1	1	1
ENSG00000110675	ELMOD1	0.51076	9.81523e-05	1	1	1
ENSG00000083454	P2RX5	0.510802	0.000123625	1	1	1
ENSG00000183775	KCTD16	0.510846	0.000157434	1	1	1
ENSG00000133816	MICAL2	0.510951	0.00012271	1	1	1
ENSG00000196704	AMZ2	0.511075	9.28546e-05	1	1	1
ENSG00000131015	ULBP2	0.511076	9.99417e-05	1	0	1
ENSG00000078725	BRINP1	0.511099	0.000109992	1	1	1
ENSG00000267272	LINC01140	0.511213	6.84471e-05	1	1	1
ENSG00000140945	CDH13	0.511221	0.000106952	1	1	1
ENSG00000184999	SLC22A10	0.511257	0.000151599	1	1	1
ENSG00000272016	ENSG00000272016	0.511368	0.000106952	1	1	1
ENSG00000204392	LSM2	0.511431	0.000134072	1	1	1
ENSG00000206187	LINC02346	0.51145	0.00012271	1	1	1
ENSG00000104722	NEFM	0.511571	0.000126826	1	1	1
ENSG00000117009	KMO	0.511611	0.000175429	1	1	1
ENSG00000140015	KCNH5	0.511721	0.00018384	1	1	1
ENSG00000078018	MAP2	0.51186	0.000143955	1	1	1
ENSG00000269998	ENSG00000269998	0.511886	0.000114788	1	1	1
ENSG00000163673	DCLK3	0.511897	0.00011484	1	1	1
ENSG00000160145	KALRN	0.511908	0.000115034	1	1	1
ENSG00000169271	HSPB3	0.512063	0.000113634	1	1	1
ENSG00000165819	METTL3	0.512258	0.000113634	1	1	1
ENSG00000182575	NXPH3	0.512355	6.37149e-05	1	1	1
ENSG00000104723	TUSC3	0.512377	0.000188481	1	1	1
ENSG00000170004	CHD3	0.512533	0.000191564	1	1	1
ENSG00000048545	GUCA1A	0.512747	0.000157434	1	1	1
ENSG00000158050	DUSP2	0.512772	5.69384e-05	1	1	1
ENSG00000102466	FGF14	0.512855	0.000156931	1	1	1
ENSG00000160932	LY6E	0.512864	0.000106952	1	1	1
ENSG00000205562	AL049775.1	0.51309	5.92161e-05	1	1	1
ENSG00000123349	PFDN5	0.513122	0.000144119	1	1	1
ENSG00000120685	PROSER1	0.513168	6.20577e-05	1	1	1
ENSG00000138286	FAM149B1	0.513365	0.000133515	1	1	1
ENSG00000143379	SETDB1	0.513376	0.000207395	1	1	1
ENSG00000115598	IL1RL2	0.513396	0.000122036	1	1	1
ENSG00000137825	ITPKA	0.513414	0.000141315	1	1	1
ENSG00000171159	C9orf16	0.51352	4.91472e-05	1	1	1
ENSG00000134317	GRHL1	0.513774	0.000174169	1	1	1
ENSG00000167680	SEMA6B	0.514043	0.000121431	1	1	1
ENSG00000160161	CILP2	0.514149	9.4585e-05	1	1	1
ENSG00000167964	RAB26	0.514189	9.20881e-05	1	1	1
ENSG00000139998	RAB15	0.514219	0.000159155	1	1	1
ENSG00000115760	BIRC6	0.514234	3.87526e-05	1	1	1
ENSG00000203875	SNHG5	0.514256	0.000246442	1	1	1
ENSG00000196482	ESRRG	0.514352	4.8483e-05	1	1	1
ENSG00000255082	GRM5-AS1	0.51436	0.000255229	1	1	1
ENSG00000145349	CAMK2D	0.5144	0.000136602	1	1	1
ENSG00000253537	PCDHGA7	0.514405	8.65827e-05	1	1	1
ENSG00000005249	PRKAR2B	0.514407	8.8784e-05	1	1	1
ENSG00000257069	AP001453.3	0.514509	0.000102283	1	1	1
ENSG00000174775	HRAS	0.514516	7.80535e-05	1	1	1
ENSG00000171992	SYNPO	0.514712	0.000157434	1	1	1
ENSG00000152214	RIT2	0.514758	0.000139331	1	1	1
ENSG00000139182	CLSTN3	0.514784	0.000175674	1	1	1
ENSG00000172292	CERS6	0.514786	0.000191045	1	1	1
ENSG00000136531	SCN2A	0.51497	0.000288565	1	1	1
ENSG00000146386	ABRACL	0.515257	0.000154282	1	1	1
ENSG00000115641	FHL2	0.515279	0.000220432	1	1	1
ENSG00000103145	HCFC1R1	0.515299	0.000118386	1	1	1
ENSG00000168061	SAC3D1	0.515405	0.000373502	1	1	1
ENSG00000280435	AC006058.4	0.515442	9.01259e-05	1	1	1
ENSG00000234394	AL353608.3	0.515448	0.000116585	1	0	1
ENSG00000153823	PID1	0.515494	5.15887e-05	1	1	1
ENSG00000233123	LINC01007	0.515572	8.50792e-05	1	1	1
ENSG00000221946	FXYD7	0.515655	7.61178e-05	1	1	1
ENSG00000127366	TAS2R5	0.515716	0.000144008	1	1	1
ENSG00000176171	BNIP3	0.515763	0.000110697	1	1	1
ENSG00000206052	DOK6	0.515871	6.31068e-05	1	1	1
ENSG00000112290	WASF1	0.516083	0.000202233	1	1	1
ENSG00000104327	CALB1	0.516226	0.000207717	1	1	1
ENSG00000079308	TNS1	0.516372	0.000200678	1	1	1
ENSG00000085831	TTC39A	0.516413	0.000144824	1	1	1
ENSG00000198225	FKBP1C	0.516426	8.18367e-05	1	1	1
ENSG00000120899	PTK2B	0.516803	0.000168675	1	1	1
ENSG00000235961	PNMA6A	0.516862	0.000612802	1	1	1
ENSG00000128250	RFPL1	0.516951	9.20881e-05	1	1	1
ENSG00000077327	SPAG6	0.517106	6.65688e-05	1	1	1
ENSG00000168993	CPLX1	0.517121	0.000114274	1	1	1
ENSG00000180616	SSTR2	0.517222	0.000131202	1	1	1
ENSG00000090971	NAT14	0.517264	4.8483e-05	1	1	1
ENSG00000135549	PKIB	0.517364	0.000116226	1	1	1
ENSG00000168350	DEGS2	0.517638	0.000146529	1	1	1
ENSG00000079819	EPB41L2	0.517674	4.92724e-05	1	1	1
ENSG00000198763	MT-ND2	0.517707	0.000437377	1	0	1
ENSG00000014641	MDH1	0.517717	0.00061377	1	1	1
ENSG00000151789	ZNF385D	0.517822	9.81523e-05	1	1	1
ENSG00000052841	TTC17	0.518032	0.000132964	1	1	1
ENSG00000153233	PTPRR	0.518119	0.000206256	1	1	1
ENSG00000121440	PDZRN3	0.518242	0.000177006	1	1	1
ENSG00000242173	ARHGDIG	0.518274	9.11948e-05	1	1	1
ENSG00000166619	BLCAP	0.518424	6.9345e-05	1	1	1
ENSG00000107242	PIP5K1B	0.518429	0.00012271	1	1	1
ENSG00000175416	CLTB	0.518783	5.51661e-05	1	1	1
ENSG00000188785	ZNF548	0.51879	0.000143231	1	1	1
ENSG00000186300	ZNF555	0.518828	9.38396e-05	1	1	1
ENSG00000184347	SLIT3	0.518899	0.000167023	1	1	1
ENSG00000265179	AP000894.2	0.518928	0.000171749	1	1	1
ENSG00000125848	FLRT3	0.519109	0.000354769	1	1	1
ENSG00000125675	GRIA3	0.519169	0.000169662	1	1	1
ENSG00000149932	TMEM219	0.519172	0.000167023	1	1	1
ENSG00000124785	NRN1	0.519302	0.000456457	1	1	1
ENSG00000270689	BUD13P1	0.51959	0.000121005	1	1	1
ENSG00000105705	SUGP1	0.519687	0.000100914	1	1	1
ENSG00000235865	GSN-AS1	0.519938	5.0012e-05	1	1	1
ENSG00000183011	NAA38	0.519951	0.000167023	1	1	1
ENSG00000100285	NEFH	0.519994	0.000536318	1	1	1
ENSG00000145242	EPHA5	0.520109	0.000405039	1	1	1
ENSG00000258283	AC011603.3	0.520142	0.000173001	1	1	1
ENSG00000153563	CD8A	0.520238	0.000333737	1	1	1
ENSG00000145526	CDH18	0.520297	0.000180836	1	1	1
ENSG00000162687	KCNT2	0.520418	0.000437377	1	1	1
ENSG00000124194	GDAP1L1	0.520537	0.000231171	1	1	1
ENSG00000108523	RNF167	0.520572	6.27497e-05	1	1	1
ENSG00000137563	GGH	0.520624	0.000300692	1	1	1
ENSG00000266472	MRPS21	0.52063	0.000113633	1	1	1
ENSG00000102172	SMS	0.520852	0.000208692	1	1	1
ENSG00000091482	SMPX	0.520862	0.000156203	1	1	1
ENSG00000255087	AP001993.1	0.520879	0.000154129	1	1	1
ENSG00000136099	PCDH8	0.521006	0.000175307	1	1	1
ENSG00000159899	NPR2	0.521097	6.65688e-05	1	1	1
ENSG00000198673	FAM19A2	0.521159	0.000208733	1	1	1
ENSG00000072657	TRHDE	0.521172	0.000241216	1	1	1
ENSG00000122254	HS3ST2	0.521183	0.00012613	1	0	1
ENSG00000269210	AC019171.1	0.521212	0.000199525	1	1	1
ENSG00000158856	DMTN	0.521231	0.000397223	1	1	1
ENSG00000232040	ZBED9	0.521314	0.000199675	1	1	1
ENSG00000150361	KLHL1	0.521465	0.000161057	1	0	1
ENSG00000145934	TENM2	0.521484	0.000200589	1	1	1
ENSG00000196542	SPTSSB	0.521487	0.00023906	1	1	1
ENSG00000156411	ATP5MPL	0.521882	4.63246e-05	1	1	1
ENSG00000048740	CELF2	0.522035	0.000188574	1	1	1
ENSG00000250584	LINC01511	0.52209	0.000206495	1	1	1
ENSG00000101746	NOL4	0.522115	9.64814e-05	1	1	1
ENSG00000116793	PHTF1	0.522191	0.000114279	1	1	1
ENSG00000261193	AC134312.4	0.522253	0.000154699	1	1	1
ENSG00000159247	TUBBP5	0.522394	0.000208535	1	1	1
ENSG00000138378	STAT4	0.522516	0.000180836	1	1	1
ENSG00000130590	SAMD10	0.522662	8.39393e-05	1	1	1
ENSG00000196507	TCEAL3	0.522685	0.000221397	1	1	1
ENSG00000071889	FAM3A	0.522797	0.000693194	1	1	1
ENSG00000138606	SHF	0.522802	7.56976e-05	1	1	1
ENSG00000259327	AC023906.3	0.522919	0.000269645	1	1	1
ENSG00000175806	MSRA	0.523122	0.000115474	1	1	1
ENSG00000105254	TBCB	0.523179	0.00347692	1	1	1
ENSG00000173406	DAB1	0.52318	7.36949e-05	1	1	1
ENSG00000143590	EFNA3	0.523227	0.000220632	1	1	1
ENSG00000227372	TP73-AS1	0.52348	0.000272957	1	1	1
ENSG00000184281	TSSC4	0.523566	0.000526044	1	1	1
ENSG00000144407	PTH2R	0.523578	0.000174169	1	1	1
ENSG00000124507	PACSIN1	0.523732	0.000169662	1	1	1
ENSG00000119946	CNNM1	0.523754	0.000205166	1	1	1
ENSG00000126749	EMG1	0.523795	0.000435874	1	1	1
ENSG00000189241	TSPYL1	0.523854	0.000168538	1	1	1
ENSG00000253972	MAL2-AS1	0.523931	0.000191045	1	1	1
ENSG00000134986	NREP	0.52394	6.41976e-05	1	1	1
ENSG00000105642	KCNN1	0.524005	0.000241299	1	1	1
ENSG00000254585	MAGEL2	0.524012	0.000290898	1	1	1
ENSG00000007516	BAIAP3	0.524047	0.000275588	1	1	1
ENSG00000040608	RTN4R	0.524103	0.000235994	1	1	1
ENSG00000088832	FKBP1A	0.524336	7.65654e-05	1	1	1
ENSG00000137494	ANKRD42	0.524423	0.000175043	1	1	1
ENSG00000177098	SCN4B	0.524455	0.00023906	1	1	1
ENSG00000163932	PRKCD	0.524465	0.000279015	1	1	1
ENSG00000164951	PDP1	0.524472	0.000233966	1	1	1
ENSG00000143256	PFDN2	0.524549	0.000279505	1	1	1
ENSG00000172782	FADS6	0.524557	0.000239595	1	1	1
ENSG00000136856	SLC2A8	0.524558	0.000262831	1	1	1
ENSG00000136935	GOLGA1	0.524567	0.000165317	1	1	1
ENSG00000164100	NDST3	0.524712	0.000322752	1	1	1
ENSG00000106648	GALNTL5	0.524719	0.000209441	1	0	1
ENSG00000119042	SATB2	0.524769	0.00024385	1	1	1
ENSG00000227825	SLC9A7P1	0.524778	0.000244212	1	1	1
ENSG00000111344	RASAL1	0.524833	9.99417e-05	1	1	1
ENSG00000108018	SORCS1	0.524934	0.000222974	1	1	1
ENSG00000197969	VPS13A	0.525037	0.000497961	1	1	1
ENSG00000172794	RAB37	0.525222	8.73358e-05	1	1	1
ENSG00000178015	GPR150	0.525332	0.000331721	1	0	1
ENSG00000124134	KCNS1	0.525386	0.000180836	1	1	1
ENSG00000186487	MYT1L	0.525412	0.000361488	1	1	1
ENSG00000183479	TREX2	0.525472	0.000251559	1	1	1
ENSG00000186288	PABPC1L2A	0.525582	0.00024385	1	1	1
ENSG00000204789	ZNF204P	0.525647	0.000279505	1	1	1
ENSG00000154099	DNAAF1	0.525775	8.18367e-05	1	1	1
ENSG00000226490	AC138647.1	0.525884	0.000174169	1	1	1
ENSG00000054356	PTPRN	0.525985	0.000215618	1	1	1
ENSG00000162494	LRRC38	0.525986	0.000291251	1	1	1
ENSG00000278897	AC020951.1	0.526144	0.00022949	1	1	1
ENSG00000273604	EPOP	0.526147	0.00037287	1	1	1
ENSG00000276991	RF01877	0.526161	0.000175043	1	1	1
ENSG00000168090	COPS6	0.526182	0.000657284	1	1	1
ENSG00000107130	NCS1	0.526197	0.000279703	1	1	1
ENSG00000110427	KIAA1549L	0.526262	0.000245625	1	1	1
ENSG00000165061	ZMAT4	0.52635	0.00023955	1	1	1
ENSG00000130005	GAMT	0.526368	0.000419897	1	1	1
ENSG00000155974	GRIP1	0.526428	0.000246442	1	1	1
ENSG00000170786	SDR16C5	0.526443	0.000208692	1	1	1
ENSG00000161681	SHANK1	0.526486	0.000311541	1	1	1
ENSG00000224032	EPB41L4A-AS1	0.526683	0.00066998	1	1	1
ENSG00000131831	RAI2	0.526746	0.000207154	1	1	1
ENSG00000176454	LPCAT4	0.526767	0.000275588	1	1	1
ENSG00000225663	MCRIP1	0.526786	0.000238829	1	1	1
ENSG00000159753	CARMIL2	0.52697	0.000222974	1	1	1
ENSG00000157782	CABP1	0.527003	0.0106818	1	1	1
ENSG00000139874	SSTR1	0.527035	0.00039478	1	1	1
ENSG00000197937	ZNF347	0.527038	0.000107494	1	1	1
ENSG00000123360	PDE1B	0.527189	0.00039543	1	1	1
ENSG00000178394	HTR1A	0.527311	0.000340615	1	0	1
ENSG00000130177	CDC16	0.527321	0.000238565	1	1	1
ENSG00000005486	RHBDD2	0.527355	8.76233e-05	1	1	1
ENSG00000185551	NR2F2	0.527504	0.00044505	1	1	1
ENSG00000204677	FAM153C	0.527544	0.000168421	1	1	1
ENSG00000183090	FREM3	0.527602	0.000133419	1	0	1
ENSG00000143502	SUSD4	0.527602	0.000331564	1	1	1
ENSG00000052126	PLEKHA5	0.527654	0.000220632	1	1	1
ENSG00000008256	CYTH3	0.527686	0.000210893	1	1	1
ENSG00000270069	MIR222HG	0.527695	0.000156203	1	1	1
ENSG00000111262	KCNA1	0.527702	0.000334232	1	1	1
ENSG00000143164	DCAF6	0.527734	0.000448447	1	1	1
ENSG00000119698	PPP4R4	0.527748	0.000441581	1	1	1
ENSG00000166105	GLB1L3	0.527829	0.000189811	1	1	1
ENSG00000197705	KLHL14	0.527915	0.000437377	1	0	1
ENSG00000143867	OSR1	0.52792	0.000208038	1	0	1
ENSG00000168348	INSM2	0.52804	0.000322981	1	1	1
ENSG00000185989	RASA3	0.528146	0.000457048	1	1	1
ENSG00000053438	NNAT	0.528282	0.000161364	1	1	1
ENSG00000247853	AC006064.2	0.528381	0.000159765	1	1	1
ENSG00000198585	NUDT16	0.528511	0.000246442	1	1	1
ENSG00000179915	NRXN1	0.528524	0.000328639	1	1	1
ENSG00000006210	CX3CL1	0.528582	0.000275588	1	1	1
ENSG00000105784	RUNDC3B	0.528609	0.000368985	1	1	1
ENSG00000139973	SYT16	0.528701	0.000354317	1	1	1
ENSG00000140743	CDR2	0.528734	0.000609531	1	1	1
ENSG00000116106	EPHA4	0.528738	0.000354769	1	1	1
ENSG00000049130	KITLG	0.528749	0.000415002	1	1	1
ENSG00000197457	STMN3	0.528787	0.000255208	1	1	1
ENSG00000103034	NDRG4	0.528853	0.000399149	1	1	1
ENSG00000165899	OTOGL	0.528906	0.000637782	1	1	1
ENSG00000128487	SPECC1	0.528944	0.00023906	1	1	1
ENSG00000102104	RS1	0.529034	0.000277009	1	1	1
ENSG00000233932	CTXN2	0.529083	0.000351465	1	1	1
ENSG00000253846	PCDHGA10	0.529312	0.000243127	1	1	1
ENSG00000184470	TXNRD2	0.529333	0.00024174	1	1	1
ENSG00000168830	HTR1E	0.529353	0.000136238	1	1	1
ENSG00000279138	AP002847.1	0.52938	0.000333737	1	1	1
ENSG00000260837	ENSG00000260837	0.529435	0.000333333	1	1	1
ENSG00000206432	TMEM200C	0.52947	0.000119833	1	1	1
ENSG00000118307	CASC1	0.529535	0.0111447	1	1	1
ENSG00000077279	DCX	0.529621	0.000376506	1	1	1
ENSG00000138675	FGF5	0.529754	0.000168675	1	1	1
ENSG00000035141	FAM136A	0.529755	0.000235068	1	1	1
ENSG00000139714	MORN3	0.529785	0.000376447	1	1	1
ENSG00000156976	EIF4A2	0.529808	0.000203127	1	1	1
ENSG00000160345	C9orf116	0.529841	9.34478e-05	1	1	1
ENSG00000154478	GPR26	0.529897	0.000234117	1	1	1
ENSG00000148308	GTF3C5	0.529922	0.000427009	1	1	1
ENSG00000174453	VWC2L	0.530143	0.000269555	1	1	1
ENSG00000153253	SCN3A	0.530245	0.000220052	1	1	1
ENSG00000198689	SLC9A6	0.530294	0.000595421	1	1	1
ENSG00000198435	NRARP	0.530366	7.69524e-05	1	1	1
ENSG00000164440	TXLNB	0.530433	0.000389437	1	1	1
ENSG00000120820	GLT8D2	0.53051	0.000247859	1	1	1
ENSG00000140939	NOL3	0.530548	0.00039543	1	1	1
ENSG00000143156	NME7	0.530591	0.000289715	1	1	1
ENSG00000168032	ENTPD3	0.530685	0.000287424	1	1	1
ENSG00000165752	STK32C	0.53072	0.000220958	1	1	1
ENSG00000267909	CCDC177	0.530862	0.000312006	1	1	1
ENSG00000166922	SCG5	0.531102	0.000464885	1	1	1
ENSG00000137766	UNC13C	0.531108	0.000334161	1	1	1
ENSG00000106263	EIF3B	0.531285	0.000819973	1	1	1
ENSG00000136938	ANP32B	0.5314	0.000248761	1	1	1
ENSG00000151952	TMEM132D	0.531401	0.000481485	1	1	1
ENSG00000079841	RIMS1	0.531409	0.00032098	1	1	1
ENSG00000177238	TRIM72	0.531563	9.59008e-05	1	1	1
ENSG00000096092	TMEM14A	0.531592	0.000553013	1	1	1
ENSG00000162105	SHANK2	0.531594	0.000219574	1	1	1
ENSG00000163166	IWS1	0.531669	0.000239595	1	1	1
ENSG00000154027	AK5	0.531806	0.000391578	1	1	1
ENSG00000204044	SLC12A5-AS1	0.531814	0.000230957	1	1	1
ENSG00000105880	DLX5	0.531914	0.000255208	1	1	1
ENSG00000104969	SGTA	0.532019	0.000631794	1	1	1
ENSG00000259234	ANKRD34C-AS1	0.532066	0.00066646	1	0	1
ENSG00000137824	RMDN3	0.532077	0.000167023	1	1	1
ENSG00000082014	SMARCD3	0.532111	0.000114279	1	1	1
ENSG00000186891	TNFRSF18	0.532123	0.000235994	1	1	1
ENSG00000112149	CD83	0.532162	0.000389073	1	1	1
ENSG00000136950	ARPC5L	0.532244	0.000273912	1	1	1
ENSG00000100167	SEPT3	0.532284	0.00057508	1	1	1
ENSG00000164610	RP9	0.532378	0.000463472	1	1	1
ENSG00000128573	FOXP2	0.532623	0.000749047	1	1	1
ENSG00000141580	WDR45B	0.532627	0.000263608	1	1	1
ENSG00000235426	AL133481.1	0.532631	0.000456502	1	1	1
ENSG00000132359	RAP1GAP2	0.53264	0.000310925	1	1	1
ENSG00000134121	CHL1	0.532649	0.000638842	1	1	1
ENSG00000135953	MFSD9	0.532718	9.74412e-05	1	1	1
ENSG00000171243	SOSTDC1	0.532793	0.000322752	1	1	1
ENSG00000184014	DENND5A	0.532821	0.000356209	1	1	1
ENSG00000100142	POLR2F	0.532845	0.000359481	1	1	1
ENSG00000072110	ACTN1	0.532867	0.000231261	1	1	1
ENSG00000147246	HTR2C	0.532947	0.000249481	1	1	1
ENSG00000101958	GLRA2	0.532952	0.000653479	1	0	1
ENSG00000138028	CGREF1	0.532954	0.000434179	1	1	1
ENSG00000139970	RTN1	0.532998	0.000340398	1	1	1
ENSG00000123901	GPR83	0.533081	0.000245642	1	1	1
ENSG00000162981	FAM84A	0.533088	0.000277009	1	1	1
ENSG00000163793	DNAJC5G	0.533193	0.000209441	1	0	1
ENSG00000178127	NDUFV2	0.533271	0.000631794	1	1	1
ENSG00000236922	LINC01378	0.533274	0.00029336	1	0	1
ENSG00000224116	INHBA-AS1	0.533277	0.000375338	1	1	1
ENSG00000272909	AL122035.2	0.533293	0.000365178	1	1	1
ENSG00000228594	FNDC10	0.533358	0.000220632	1	1	1
ENSG00000156463	SH3RF2	0.53346	0.000320425	1	1	1
ENSG00000091622	PITPNM3	0.533496	0.000351465	1	1	1
ENSG00000112981	NME5	0.533564	0.000440032	1	1	1
ENSG00000157106	SMG1	0.533653	9.23773e-05	1	1	1
ENSG00000132275	RRP8	0.533741	0.000372953	1	1	1
ENSG00000178821	TMEM52	0.533764	0.000262831	1	1	1
ENSG00000138814	PPP3CA	0.533902	0.000275588	1	1	1
ENSG00000181908	AP003774.1	0.533911	0.000255208	1	1	1
ENSG00000150556	LYPD6B	0.533967	0.000371581	1	1	1
ENSG00000137843	PAK6	0.534008	0.000217186	1	1	1
ENSG00000182768	NGRN	0.534052	0.000762745	1	1	1
ENSG00000213047	DENND1B	0.534072	0.000376978	1	1	1
ENSG00000136141	LRCH1	0.534085	0.000157434	1	1	1
ENSG00000112232	KHDRBS2	0.534142	0.000182464	1	1	1
ENSG00000152969	JAKMIP1	0.534153	0.000771338	1	1	1
ENSG00000135324	MRAP2	0.534153	0.000370811	1	1	1
ENSG00000144355	DLX1	0.53419	0.000207845	1	1	1
ENSG00000225110	PNMA6F	0.534203	0.000456457	1	1	1
ENSG00000081803	CADPS2	0.534231	0.000185534	1	1	1
ENSG00000177479	ARIH2	0.534318	0.00061377	1	1	1
ENSG00000157870	FAM213B	0.534338	0.000606154	1	1	1
ENSG00000123191	ATP7B	0.534399	0.000129389	1	1	1
ENSG00000272420	AL513477.2	0.534435	9.41114e-05	1	1	1
ENSG00000145491	ROPN1L	0.534465	0.000309988	1	1	1
ENSG00000157542	KCNJ6	0.534626	0.000343159	1	1	1
ENSG00000183785	TUBA8	0.53464	0.000428401	1	1	1
ENSG00000205037	AC134312.1	0.534668	0.000462557	1	1	1
ENSG00000264443	AL445686.2	0.534679	0.000195538	1	1	1
ENSG00000231233	CFAP58-AS1	0.534702	0.00060558	1	1	1
ENSG00000145147	SLIT2	0.534724	0.000413402	1	1	1
ENSG00000198216	CACNA1E	0.534768	0.000350188	1	1	1
ENSG00000248455	LINC02217	0.534774	0.000346666	1	1	1
ENSG00000215217	C5orf49	0.53479	0.000174169	1	1	1
ENSG00000221866	PLXNA4	0.534849	0.000370811	1	1	1
ENSG00000007520	TSR3	0.53498	0.000573711	1	1	1
ENSG00000234390	USP27X-AS1	0.535075	0.000399505	1	1	1
ENSG00000136052	SLC41A2	0.53536	0.000497223	1	1	1
ENSG00000100941	PNN	0.53538	0.000334885	1	1	1
ENSG00000132763	MMACHC	0.535404	0.000190893	1	1	1
ENSG00000164465	DCBLD1	0.535498	0.00113162	1	1	1
ENSG00000187122	SLIT1	0.535521	0.000413402	1	1	1
ENSG00000272379	AL008729.2	0.535549	0.000344309	1	1	1
ENSG00000111218	PRMT8	0.535572	0.000381668	1	1	1
ENSG00000161677	JOSD2	0.535627	0.00104109	1	1	1
ENSG00000171943	SRGAP2C	0.535642	0.00026368	1	1	1
ENSG00000177556	ATOX1	0.535675	0.000671796	1	1	1
ENSG00000171246	NPTX1	0.53573	0.000439356	1	1	1
ENSG00000197343	ZNF655	0.535735	0.000166615	1	1	1
ENSG00000187186	AL162231.1	0.535804	0.000156203	1	1	1
ENSG00000182621	PLCB1	0.53581	0.000607628	1	1	1
ENSG00000101977	MCF2	0.535811	0.000610679	1	1	1
ENSG00000166979	EVA1C	0.535965	0.000455493	1	1	1
ENSG00000269145	AC007192.2	0.536025	0.000173001	1	1	1
ENSG00000006432	MAP3K9	0.536045	0.000407206	1	1	1
ENSG00000114812	VIPR1	0.536091	0.000358072	1	1	1
ENSG00000174460	ZCCHC12	0.536095	0.000449445	1	1	1
ENSG00000101412	E2F1	0.536332	0.000129389	1	1	1
ENSG00000133135	RNF128	0.536368	0.000217186	1	1	1
ENSG00000165424	ZCCHC24	0.536441	0.000389728	1	1	1
ENSG00000148120	C9orf3	0.536613	0.000660372	1	1	1
ENSG00000178752	ERFE	0.536917	0.000346666	1	1	1
ENSG00000221890	NPTXR	0.536947	0.000463472	1	1	1
ENSG00000176840	MIR7-3HG	0.536948	0.000490866	1	1	1
ENSG00000188916	FAM196A	0.537003	0.000249444	1	1	1
ENSG00000124702	KLHDC3	0.537056	0.000245037	1	1	1
ENSG00000163536	SERPINI1	0.537292	0.000269645	1	1	1
ENSG00000260230	FRRS1L	0.537296	0.00154758	1	1	1
ENSG00000125775	SDCBP2	0.537347	0.000266068	1	1	1
ENSG00000185274	GALNT17	0.537622	0.000406656	1	1	1
ENSG00000186577	SMIM29	0.537741	0.000286159	1	1	1
ENSG00000269945	AC004817.4	0.537831	0.000385922	1	1	1
ENSG00000130511	SSBP4	0.537891	0.000244196	1	1	1
ENSG00000182512	GLRX5	0.537972	0.000698052	1	1	1
ENSG00000111305	GSG1	0.538067	0.000406656	1	1	1
ENSG00000137571	SLCO5A1	0.538181	0.000329118	1	0	1
ENSG00000102109	PCSK1N	0.538205	0.00026477	1	1	1
ENSG00000128563	PRKRIP1	0.538252	0.000532779	1	1	1
ENSG00000263809	AC135178.2	0.538261	0.000161364	1	1	1
ENSG00000058404	CAMK2B	0.53827	0.000406218	1	1	1
ENSG00000058091	CDK14	0.53827	0.000664408	1	1	1
ENSG00000187772	LIN28B	0.538478	0.000215009	1	1	1
ENSG00000108947	EFNB3	0.53854	0.000481485	1	1	1
ENSG00000116205	TCEANC2	0.538543	0.00038142	1	1	1
ENSG00000197381	ADARB1	0.538632	0.000235994	1	1	1
ENSG00000132386	SERPINF1	0.538658	0.000445444	1	0	1
ENSG00000204271	SPIN3	0.538668	0.000210913	1	1	1
ENSG00000125850	OVOL2	0.538677	0.000351465	1	1	1
ENSG00000175985	PLEKHD1	0.538781	0.000206042	1	1	1
ENSG00000120049	KCNIP2	0.538864	0.000406656	1	1	1
ENSG00000183978	COA3	0.538865	0.000607628	1	1	1
ENSG00000061918	GUCY1B1	0.538932	0.000610679	1	1	1
ENSG00000107262	BAG1	0.538938	0.000559434	1	1	1
ENSG00000169116	PARM1	0.538955	0.000618826	1	1	1
ENSG00000040731	CDH10	0.539188	0.000558252	1	1	1
ENSG00000158089	GALNT14	0.539282	0.00046837	1	1	1
ENSG00000260432	ENSG00000260432	0.539313	0.000551028	1	1	1
ENSG00000184831	APOO	0.539326	0.000625758	1	1	1
ENSG00000236859	NIFK-AS1	0.539356	0.000487042	1	1	1
ENSG00000119632	IFI27L2	0.539361	0.000180836	1	1	1
ENSG00000101460	MAP1LC3A	0.539377	0.0012585	1	1	1
ENSG00000147234	FRMPD3	0.539472	0.000198236	1	1	1
ENSG00000183248	PRR36	0.539567	0.000483268	1	1	1
ENSG00000204356	NELFE	0.53963	0.000558252	1	1	1
ENSG00000231632	ENSG00000231632	0.539684	0.000881623	1	0	1
ENSG00000156687	UNC5D	0.539735	0.000539107	1	1	1
ENSG00000196932	TMEM26	0.539744	0.000174169	1	1	1
ENSG00000267665	AC021683.3	0.539753	0.000262831	1	1	1
ENSG00000165194	PCDH19	0.539805	0.000570207	1	1	1
ENSG00000152092	ASTN1	0.539964	0.00027715	1	1	1
ENSG00000144645	OSBPL10	0.540014	0.000500053	1	1	1
ENSG00000180875	GREM2	0.54003	0.000409409	1	1	1
ENSG00000162873	KLHDC8A	0.540163	0.000215618	1	1	1
ENSG00000172465	TCEAL1	0.540244	0.000775502	1	1	1
ENSG00000134443	GRP	0.54031	0.000333333	1	1	1
ENSG00000181085	MAPK15	0.540325	0.00013129	1	1	1
ENSG00000153820	SPHKAP	0.54036	0.000180836	1	1	1
ENSG00000176101	SSNA1	0.540399	0.000538758	1	1	1
ENSG00000250510	GPR162	0.540399	0.000349613	1	1	1
ENSG00000152520	PAN3	0.54048	0.000348974	1	1	1
ENSG00000129159	KCNC1	0.540523	0.000437377	1	1	1
ENSG00000279013	AC110774.1	0.540531	0.00055133	1	1	1
ENSG00000172346	CSDC2	0.540564	0.000215618	1	1	1
ENSG00000147465	STAR	0.540571	0.00040005	1	1	1
ENSG00000183023	SLC8A1	0.54061	0.000699811	1	1	1
ENSG00000204442	FAM155A	0.540661	0.000605938	1	1	1
ENSG00000279663	AC104623.2	0.540693	0.000365178	1	1	1
ENSG00000169764	UGP2	0.540729	0.00212793	1	1	1
ENSG00000205208	C4orf46	0.540754	0.00039543	1	1	1
ENSG00000050165	DKK3	0.540786	0.00104996	1	1	1
ENSG00000120088	CRHR1	0.540876	0.000355	1	1	1
ENSG00000267673	FDX2	0.540909	0.000199459	1	1	1
ENSG00000072133	RPS6KA6	0.540921	0.000614615	1	1	1
ENSG00000179603	GRM8	0.541086	0.000599635	1	1	1
ENSG00000196549	MME	0.541346	0.000284578	1	1	1
ENSG00000227617	CERS6-AS1	0.541347	0.000515312	1	1	1
ENSG00000010626	LRRC23	0.541348	0.000582724	1	1	1
ENSG00000182809	CRIP2	0.541379	0.000272362	1	1	1
ENSG00000145063	AC062028.1	0.541463	0.000345907	1	1	1
ENSG00000174744	BRMS1	0.541489	0.000441581	1	1	1
ENSG00000131408	NR1H2	0.541496	0.000303006	1	1	1
ENSG00000162188	GNG3	0.541499	0.00057429	1	1	1
ENSG00000100387	RBX1	0.541574	0.000372644	1	1	1
ENSG00000245937	LINC01184	0.541616	0.000449168	1	1	1
ENSG00000215196	BASP1-AS1	0.541708	0.000463472	1	1	1
ENSG00000269987	AC004542.2	0.541754	0.000268614	1	1	1
ENSG00000119508	NR4A3	0.541782	0.000287424	1	1	1
ENSG00000065923	SLC9A7	0.541837	0.000568812	1	1	1
ENSG00000125931	CITED1	0.541842	0.000419475	1	1	1
ENSG00000169933	FRMPD4	0.542069	0.000639813	1	1	1
ENSG00000165802	NSMF	0.542093	0.000498116	1	1	1
ENSG00000170584	NUDCD2	0.542189	0.000652074	1	1	1
ENSG00000101098	RIMS4	0.542224	0.000449168	1	1	1
ENSG00000185933	CALHM1	0.542227	0.000511591	1	1	1
ENSG00000280234	AC124303.2	0.542238	0.000396124	1	1	1
ENSG00000177600	RPLP2	0.542255	0.00091144	1	1	1
ENSG00000106617	PRKAG2	0.542269	0.000614615	1	1	1
ENSG00000214376	VSTM5	0.542281	0.000500376	1	1	1
ENSG00000106479	ZNF862	0.542316	0.000367911	1	1	1
ENSG00000161682	FAM171A2	0.542478	0.000610679	1	1	1
ENSG00000169964	TMEM42	0.542482	0.0017691	1	1	1
ENSG00000266820	KPNA2P3	0.542493	0.000365178	1	1	1
ENSG00000114853	ZBTB47	0.542516	0.000747615	1	1	1
ENSG00000270181	BIVM-ERCC5	0.542523	0.000861386	1	1	1
ENSG00000154162	CDH12	0.542534	0.00060558	1	1	1
ENSG00000265784	AC006441.3	0.542604	0.000286159	1	1	1
ENSG00000213424	KRT222	0.542617	0.000455923	1	1	1
ENSG00000106341	PPP1R17	0.542622	0.000766597	1	1	1
ENSG00000141505	ASGR1	0.542637	0.000385832	1	1	1
ENSG00000086289	EPDR1	0.542643	0.00151065	1	1	1
ENSG00000152580	IGSF10	0.542681	0.000454563	1	1	1
ENSG00000144550	CPNE9	0.542821	0.000570207	1	1	1
ENSG00000272944	AC079834.2	0.542999	0.000449168	1	1	1
ENSG00000103363	ELOB	0.543027	0.000409409	1	1	1
ENSG00000196110	ZNF699	0.543037	0.000557642	1	1	1
ENSG00000163888	CAMK2N2	0.543057	0.000417563	1	1	1
ENSG00000064995	TAF11	0.5431	0.000354596	1	1	1
ENSG00000171951	SCG2	0.543148	0.00111018	1	1	1
ENSG00000133250	ZNF414	0.543213	0.000716655	1	1	1
ENSG00000220575	HTR5A-AS1	0.543263	0.000481153	1	1	1
ENSG00000229891	LINC01315	0.54336	0.000219574	1	1	1
ENSG00000125354	SEPT6	0.543462	0.000379085	1	1	1
ENSG00000149806	FAU	0.543518	0.000610679	1	1	1
ENSG00000247137	AP000873.2	0.54355	0.000171749	1	1	1
ENSG00000217236	SP9	0.543613	0.000577931	1	1	1
ENSG00000114446	IFT57	0.543762	0.000565361	1	1	1
ENSG00000108309	RUNDC3A	0.543799	0.000825534	1	1	1
ENSG00000196277	GRM7	0.54381	0.000377175	1	1	1
ENSG00000214796	AC098934.1	0.54383	0.00122422	1	1	1
ENSG00000139767	SRRM4	0.543854	0.000456457	1	1	1
ENSG00000143499	SMYD2	0.543859	0.0007519	1	1	1
ENSG00000184307	ZDHHC23	0.543916	0.0028539	1	1	1
ENSG00000108604	SMARCD2	0.543923	0.000713585	1	1	1
ENSG00000114279	FGF12	0.543933	0.00105897	1	1	1
ENSG00000162636	FAM102B	0.543986	0.00134975	1	1	1
ENSG00000166250	CLMP	0.544011	0.000239595	1	1	1
ENSG00000173452	TMEM196	0.544075	0.000645771	1	1	1
ENSG00000185008	ROBO2	0.544178	0.000338401	1	1	1
ENSG00000244040	IL12A-AS1	0.544185	0.000573711	1	1	1
ENSG00000065325	GLP2R	0.544189	0.000590066	1	0	1
ENSG00000164096	C4orf3	0.544271	0.00039478	1	1	1
ENSG00000240694	PNMA2	0.54429	0.000522944	1	1	1
ENSG00000198934	MAGEE1	0.544325	0.000334337	1	1	1
ENSG00000145506	NKD2	0.54438	0.000664408	1	1	1
ENSG00000110975	SYT10	0.544416	0.00272082	1	1	1
ENSG00000106683	LIMK1	0.5445	0.000801962	1	1	1
ENSG00000135002	RFK	0.54457	0.000887501	1	1	1
ENSG00000115353	TACR1	0.544607	0.000586154	1	1	1
ENSG00000180638	SLC47A2	0.544643	0.000388757	1	1	1
ENSG00000147408	CSGALNACT1	0.544658	0.000515312	1	1	1
ENSG00000070882	OSBPL3	0.544708	0.000456502	1	1	1
ENSG00000151882	CCL28	0.544945	0.000612315	1	1	1
ENSG00000174915	PTDSS2	0.544967	0.000792454	1	1	1
ENSG00000277692	AL121583.1	0.545091	0.0006652	1	1	1
ENSG00000198840	MT-ND3	0.545163	0.000806143	1	0	1
ENSG00000159592	GPBP1L1	0.545166	0.000614772	1	1	1
ENSG00000144713	RPL32	0.545191	0.000640173	1	1	1
ENSG00000152669	CCNO	0.545209	0.000532779	1	1	1
ENSG00000073969	NSF	0.545239	0.000729383	1	1	1
ENSG00000172943	PHF8	0.545358	0.00031148	1	1	1
ENSG00000167733	HSD11B1L	0.545371	0.000333333	1	1	1
ENSG00000162782	TDRD5	0.545379	0.000879777	1	0	1
ENSG00000226645	AP006216.1	0.545422	0.000943454	1	1	1
ENSG00000164935	DCSTAMP	0.54548	0.000343652	1	0	1
ENSG00000118276	B4GALT6	0.545482	0.000470622	1	1	1
ENSG00000167863	ATP5PD	0.545634	0.00274498	1	1	1
ENSG00000148218	ALAD	0.545646	0.000662524	1	1	1
ENSG00000267396	AC090236.1	0.545648	0.000570207	1	1	1
ENSG00000044524	EPHA3	0.545777	0.000775502	1	1	1
ENSG00000167257	RNF214	0.545808	0.000687154	1	1	1
ENSG00000055609	KMT2C	0.545824	0.000602127	1	1	1
ENSG00000170085	SIMC1	0.545876	0.000559398	1	1	1
ENSG00000198744	MTCO3P12	0.545886	0.000520381	1	1	1
ENSG00000134490	TMEM241	0.545895	0.00104811	1	1	1
ENSG00000111052	LIN7A	0.546002	0.000631794	1	1	1
ENSG00000179546	HTR1D	0.546057	0.000550247	1	1	1
ENSG00000189410	SH2D5	0.546059	0.000558252	1	1	1
ENSG00000250479	CHCHD10	0.54608	0.00039543	1	1	1
ENSG00000215039	CD27-AS1	0.546093	0.000232241	1	1	1
ENSG00000079462	PAFAH1B3	0.546112	0.000290966	1	1	1
ENSG00000125814	NAPB	0.5462	0.00068334	1	1	1
ENSG00000258504	AL157871.1	0.546212	0.00163857	1	1	1
ENSG00000244161	FLNB-AS1	0.546351	0.000817262	1	1	1
ENSG00000086504	MRPL28	0.546465	0.000650914	1	1	1
ENSG00000130119	GNL3L	0.546485	0.000373103	1	1	1
ENSG00000154065	ANKRD29	0.546594	0.000658226	1	1	1
ENSG00000169032	MAP2K1	0.546646	0.0028196	1	1	1
ENSG00000097007	ABL1	0.546828	0.00055133	1	1	1
ENSG00000184349	EFNA5	0.546893	0.000718003	1	1	1
ENSG00000162734	PEA15	0.546951	0.000161364	1	0	1
ENSG00000268069	AC004466.1	0.547041	0.00109522	1	1	1
ENSG00000197872	FAM49A	0.547066	0.000683049	1	1	1
ENSG00000196189	SEMA4A	0.547161	0.000978549	1	1	1
ENSG00000168843	FSTL5	0.547172	0.000257629	1	1	1
ENSG00000168959	GRM5	0.547172	0.000801962	1	1	1
ENSG00000109079	TNFAIP1	0.547176	0.000232932	1	1	1
ENSG00000254973	AC105219.4	0.547454	0.000687154	1	1	1
ENSG00000151914	DST	0.547498	0.00704811	1	1	1
ENSG00000176406	RIMS2	0.547515	0.000586202	1	1	1
ENSG00000198354	DCAF12L2	0.547534	0.000483268	1	1	1
ENSG00000268230	AC012313.3	0.547571	0.00105066	1	1	1
ENSG00000174197	MGA	0.547592	0.000310925	1	1	1
ENSG00000165914	TTC7B	0.547639	0.000669775	1	1	1
ENSG00000122733	PHF24	0.547678	0.000604673	1	1	1
ENSG00000108176	DNAJC12	0.547691	0.000262025	1	1	1
ENSG00000267163	ENSG00000267163	0.547747	0.000770478	1	1	1
ENSG00000198785	GRIN3A	0.547761	0.000411084	1	0	1
ENSG00000115268	RPS15	0.54781	0.000838315	1	1	1
ENSG00000174839	DENND6A	0.547834	0.000391056	1	1	1
ENSG00000256008	AC125616.1	0.547855	0.000582946	1	1	1
ENSG00000103024	NME3	0.547856	0.000825534	1	1	1
ENSG00000168546	GFRA2	0.547857	0.000680795	1	1	1
ENSG00000146221	TCTE1	0.547915	0.00046895	1	1	1
ENSG00000279553	ENSG00000279553	0.547985	0.000672783	1	1	1
ENSG00000102385	DRP2	0.548027	0.000759346	1	1	1
ENSG00000172671	ZFAND4	0.548068	0.000573711	1	1	1
ENSG00000181378	CFAP65	0.548182	0.000246442	1	1	1
ENSG00000154118	JPH3	0.548198	0.000589061	1	1	1
ENSG00000148291	SURF2	0.548205	0.000952348	1	1	1
ENSG00000240225	ZNF542P	0.548239	0.000242849	1	1	1
ENSG00000063180	CA11	0.548247	0.000771559	1	1	1
ENSG00000124191	TOX2	0.548274	0.000643445	1	1	1
ENSG00000149654	CDH22	0.548279	0.000573482	1	1	1
ENSG00000183444	OR7E38P	0.548348	0.000279505	1	1	1
ENSG00000106992	AK1	0.548411	0.000445444	1	1	1
ENSG00000229325	ACAP2-IT1	0.548469	0.000439356	1	0	1
ENSG00000247317	LY6E-DT	0.548476	0.000396124	1	1	1
ENSG00000181656	GPR88	0.548617	0.000770478	1	1	1
ENSG00000257923	CUX1	0.548737	0.000711939	1	1	1
ENSG00000111361	EIF2B1	0.548888	0.000826054	1	1	1
ENSG00000070961	ATP2B1	0.549088	0.00104944	1	1	1
ENSG00000151025	GPR158	0.549172	0.000856121	1	1	1
ENSG00000132017	DCAF15	0.549211	0.000720913	1	1	1
ENSG00000267506	AC021683.2	0.549216	0.000746335	1	0	1
ENSG00000277531	PNMA8C	0.549234	0.000562713	1	1	1
ENSG00000166407	LMO1	0.549241	0.000640173	1	0	1
ENSG00000160325	CACFD1	0.549316	0.000647996	1	1	1
ENSG00000101464	PIGU	0.549352	0.000995063	1	1	1
ENSG00000081985	IL12RB2	0.549482	0.00212894	1	0	1
ENSG00000262209	PCDHGB3	0.549529	0.00095371	1	1	1
ENSG00000148680	HTR7	0.549551	0.000592422	1	0	1
ENSG00000224043	CCNT2-AS1	0.549572	0.000241571	1	1	1
ENSG00000168795	ZBTB5	0.549657	0.000267145	1	1	1
ENSG00000172575	RASGRP1	0.54974	0.00126644	1	1	1
ENSG00000088833	NSFL1C	0.549767	0.00163857	1	1	1
ENSG00000156113	KCNMA1	0.549779	0.000675896	1	1	1
ENSG00000104361	NIPAL2	0.549784	0.000856649	1	1	1
ENSG00000255114	AP003392.3	0.549812	0.000324604	1	1	1
ENSG00000271892	AC026790.1	0.549857	0.000640173	1	1	1
ENSG00000129933	MAU2	0.549865	0.000754397	1	1	1
ENSG00000135502	SLC26A10	0.549888	0.000312878	1	1	1
ENSG00000189046	ALKBH2	0.549906	0.000645524	1	1	1
ENSG00000156486	KCNS2	0.549906	0.000862484	1	1	1
ENSG00000150403	TMCO3	0.550028	0.0007519	1	1	1
ENSG00000135776	ABCB10	0.550203	0.00040005	1	1	1
ENSG00000164855	TMEM184A	0.550269	0.000658226	1	1	1
ENSG00000162191	UBXN1	0.55045	0.00191329	1	1	1
ENSG00000213023	SYT3	0.55046	0.00166018	1	1	1
ENSG00000133302	SLF1	0.550499	0.000735148	1	1	1
ENSG00000258315	C17orf49	0.55052	0.000565361	1	1	1
ENSG00000262967	AC005921.2	0.550529	0.000650751	1	1	1
ENSG00000236015	AC011290.2	0.550536	0.000483268	1	1	1
ENSG00000118402	ELOVL4	0.550583	0.000726363	1	1	1
ENSG00000115392	FANCL	0.550632	0.000220632	1	1	1
ENSG00000263707	AC005277.1	0.550756	0.000650927	1	0	1
ENSG00000256193	LINC00507	0.550787	0.000657284	1	0	1
ENSG00000185305	ARL15	0.550851	0.00217071	1	1	1
ENSG00000068615	REEP1	0.550862	0.000841125	1	1	1
ENSG00000103942	HOMER2	0.55094	0.000688718	1	1	1
ENSG00000153132	CLGN	0.550975	0.000536318	1	1	1
ENSG00000147655	RSPO2	0.551025	0.000958463	1	1	1
ENSG00000185722	ANKFY1	0.551032	0.00023757	1	1	1
ENSG00000197724	PHF2	0.551057	0.000720913	1	1	1
ENSG00000175602	CCDC85B	0.551112	0.000334161	1	1	1
ENSG00000149929	HIRIP3	0.551142	0.000633789	1	1	1
ENSG00000122359	ANXA11	0.551143	0.000860301	1	1	1
ENSG00000146352	CLVS2	0.551185	0.00109216	1	1	1
ENSG00000075340	ADD2	0.551287	0.000838921	1	1	1
ENSG00000241158	ADAMTS9-AS1	0.551426	0.000887501	1	1	1
ENSG00000258643	BCL2L2-PABPN1	0.551434	0.000660506	1	1	1
ENSG00000126775	ATG14	0.551553	0.000538758	1	1	1
ENSG00000163046	ANKRD30BL	0.551637	0.000717073	1	1	1
ENSG00000272121	AC006058.3	0.551673	0.000921364	1	1	1
ENSG00000267796	LIN37	0.551794	0.000931823	1	1	1
ENSG00000139174	PRICKLE1	0.55181	0.00125745	1	1	1
ENSG00000154556	SORBS2	0.551881	0.000648964	1	1	1
ENSG00000173715	C11orf80	0.5519	0.000483268	1	1	1
ENSG00000090097	PCBP4	0.551919	0.00126937	1	1	1
ENSG00000253873	PCDHGA11	0.552004	0.000480992	1	1	1
ENSG00000171161	ZNF672	0.552105	0.000819973	1	1	1
ENSG00000198797	BRINP2	0.552159	0.000419859	1	1	1
ENSG00000168000	BSCL2	0.552207	0.00130802	1	1	1
ENSG00000040933	INPP4A	0.552239	0.00126904	1	1	1
ENSG00000135441	BLOC1S1	0.552253	0.000548791	1	1	1
ENSG00000185344	ATP6V0A2	0.552316	0.000752558	1	1	1
ENSG00000150394	CDH8	0.552344	0.000652888	1	1	1
ENSG00000105650	PDE4C	0.552448	0.000638842	1	1	1
ENSG00000164885	CDK5	0.552554	0.00129355	1	1	1
ENSG00000271869	AC026979.2	0.552587	0.000290242	1	1	1
ENSG00000122033	MTIF3	0.552751	0.000730878	1	1	1
ENSG00000137267	TUBB2A	0.552767	0.00125465	1	1	1
ENSG00000253629	AP000426.1	0.55278	0.000773389	1	1	1
ENSG00000148935	GAS2	0.552885	0.000310925	1	1	1
ENSG00000134874	DZIP1	0.552935	0.00115622	1	1	1
ENSG00000101327	PDYN	0.552956	0.00125465	1	0	1
ENSG00000115252	PDE1A	0.553016	0.00137024	1	1	1
ENSG00000278195	SSTR3	0.553096	0.000778887	1	1	1
ENSG00000154655	L3MBTL4	0.553242	0.000309988	1	1	1
ENSG00000062282	DGAT2	0.55325	0.000637782	1	1	1
ENSG00000100583	SAMD15	0.553261	0.000750374	1	1	1
ENSG00000171604	CXXC5	0.553334	0.00226134	1	1	1
ENSG00000078668	VDAC3	0.553338	0.00158761	1	1	1
ENSG00000151090	THRB	0.553466	0.000958463	1	1	1
ENSG00000171132	PRKCE	0.55349	0.00163928	1	1	1
ENSG00000169087	HSPBAP1	0.553514	0.00112267	1	1	1
ENSG00000151834	GABRA2	0.553541	0.00122152	1	1	1
ENSG00000197714	ZNF460	0.553581	0.000365178	1	1	1
ENSG00000175175	PPM1E	0.553746	0.00195442	1	1	1
ENSG00000130584	ZBTB46	0.553973	0.000381668	1	1	1
ENSG00000156467	UQCRB	0.553993	0.000640173	1	1	1
ENSG00000155893	PXYLP1	0.554045	0.000732882	1	1	1
ENSG00000157064	NMNAT2	0.554049	0.000838315	1	1	1
ENSG00000171488	LRRC8C	0.554052	0.000425208	1	1	1
ENSG00000166924	NYAP1	0.55415	0.00122045	1	1	1
ENSG00000198712	MT-CO2	0.554163	0.000845772	1	0	1
ENSG00000099624	ATP5F1D	0.554277	0.000785459	1	1	1
ENSG00000130731	METTL26	0.554289	0.000804163	1	1	1
ENSG00000275340	FGD5P1	0.554387	0.000771338	1	0	1
ENSG00000008324	SS18L2	0.554437	0.0012998	1	1	1
ENSG00000134057	CCNB1	0.554445	0.00133229	1	0	1
ENSG00000233427	AL009181.1	0.554613	0.000369412	1	0	1
ENSG00000126950	TMEM35A	0.554875	0.00151292	1	1	1
ENSG00000144893	MED12L	0.554966	0.00531333	1	1	1
ENSG00000078900	TP73	0.55498	0.000716655	1	1	1
ENSG00000091972	CD200	0.554988	0.000637782	1	1	1
ENSG00000180884	ZNF792	0.555024	0.000511119	1	1	1
ENSG00000082482	KCNK2	0.555167	0.00129355	1	0	1
ENSG00000167130	DOLPP1	0.555209	0.000441581	1	1	1
ENSG00000166823	MESP1	0.555224	0.000255172	1	1	1
ENSG00000134107	BHLHE40	0.555324	0.000344418	1	1	1
ENSG00000112530	PACRG	0.555476	0.001708	1	1	1
ENSG00000276408	AC025287.2	0.555517	0.000974293	1	1	1
ENSG00000147647	DPYS	0.555731	0.000766597	1	0	1
ENSG00000161381	PLXDC1	0.555822	0.000660506	1	1	1
ENSG00000197982	C1orf122	0.555861	0.000279505	1	1	1
ENSG00000103121	CMC2	0.555917	0.000849603	1	1	1
ENSG00000168234	TTC39C	0.555931	0.000979842	1	1	1
ENSG00000134775	FHOD3	0.555954	0.000843997	1	1	1
ENSG00000165985	C1QL3	0.555965	0.00143156	1	0	1
ENSG00000006128	TAC1	0.556134	0.000874612	1	0	1
ENSG00000188211	NCR3LG1	0.55614	0.00264614	1	1	1
ENSG00000170390	DCLK2	0.556191	0.000910634	1	1	1
ENSG00000104290	FZD3	0.55623	0.00132168	1	1	1
ENSG00000225465	RFPL1S	0.556286	0.000515312	1	1	1
ENSG00000152413	HOMER1	0.556325	0.00100299	1	1	1
ENSG00000163577	EIF5A2	0.556366	0.000518129	1	1	1
ENSG00000130522	JUND	0.556374	0.000852082	1	1	1
ENSG00000184076	UQCR10	0.556592	0.000913131	1	1	1
ENSG00000275131	AC241952.1	0.556597	0.000917905	1	1	1
ENSG00000009724	MASP2	0.55663	0.000643829	1	1	1
ENSG00000182580	EPHB3	0.556649	0.000301195	1	1	1
ENSG00000174791	RIN1	0.55668	0.000391905	1	1	1
ENSG00000261934	PCDHGA9	0.556695	0.000931823	1	1	1
ENSG00000162621	LRRC53	0.556728	0.000884562	1	0	1
ENSG00000026559	KCNG1	0.556729	0.000577817	1	0	1
ENSG00000188290	HES4	0.556806	0.00065121	1	1	1
ENSG00000218227	AC136632.1	0.556828	0.00057508	1	1	1
ENSG00000280304	AC104260.2	0.556904	0.00121444	1	1	1
ENSG00000240771	ARHGEF25	0.556906	0.00124101	1	1	1
ENSG00000166111	SVOP	0.556907	0.00104909	1	1	1
ENSG00000104369	JPH1	0.556912	0.00091309	1	1	1
ENSG00000197860	SGTB	0.557143	0.00178945	1	1	1
ENSG00000109881	CCDC34	0.557154	0.00314697	1	1	1
ENSG00000109452	INPP4B	0.557265	0.00106124	1	1	1
ENSG00000241570	PAQR9-AS1	0.557311	0.00139435	1	1	1
ENSG00000143013	LMO4	0.557344	0.00121944	1	1	1
ENSG00000243449	C4orf48	0.557347	0.000859107	1	1	1
ENSG00000179295	PTPN11	0.557445	0.000791631	1	1	1
ENSG00000263986	AC087393.2	0.557463	0.00107774	1	1	1
ENSG00000262758	ENSG00000262758	0.557523	0.00135975	1	1	1
ENSG00000167526	RPL13	0.557637	0.00153903	1	1	1
ENSG00000265313	LINC01476	0.55775	0.000669775	1	1	1
ENSG00000176490	DIRAS1	0.557798	0.00108398	1	1	1
ENSG00000171502	COL24A1	0.55782	0.000939005	1	0	1
ENSG00000130770	ATP5IF1	0.557872	0.000687154	1	1	1
ENSG00000066629	EML1	0.557931	0.000381668	1	1	1
ENSG00000166603	MC4R	0.558005	0.00119464	1	0	1
ENSG00000146267	FAXC	0.558075	0.00125855	1	1	1
ENSG00000127824	TUBA4A	0.558106	0.00136162	1	1	1
ENSG00000102103	PQBP1	0.558116	0.00104996	1	1	1
ENSG00000150471	ADGRL3	0.558143	0.00265235	1	1	1
ENSG00000099385	BCL7C	0.558186	0.00219917	1	1	1
ENSG00000173227	SYT12	0.55827	0.000770478	1	1	1
ENSG00000167969	ECI1	0.558272	0.000637782	1	1	1
ENSG00000100379	KCTD17	0.558291	0.000279703	1	1	1
ENSG00000150995	ITPR1	0.558304	0.00140986	1	1	1
ENSG00000109944	JHY	0.558306	0.00103004	1	1	1
ENSG00000203950	RTL8A	0.558332	0.00171305	1	1	1
ENSG00000108298	RPL19	0.558359	0.00143382	1	1	1
ENSG00000260101	AC008074.3	0.55845	0.00118037	1	1	1
ENSG00000146963	LUC7L2	0.558477	0.00126644	1	1	1
ENSG00000125266	EFNB2	0.558548	0.00225626	1	1	1
ENSG00000055118	KCNH2	0.558562	0.000500826	1	1	1
ENSG00000040275	SPDL1	0.558634	0.00112179	1	1	1
ENSG00000116497	S100PBP	0.558705	0.00126948	1	1	1
ENSG00000106615	RHEB	0.5588	0.00121444	1	1	1
ENSG00000175077	RTP1	0.558849	0.00124101	1	1	1
ENSG00000133858	ZFC3H1	0.559056	0.000775502	1	1	1
ENSG00000108021	FAM208B	0.559086	0.00065121	1	1	1
ENSG00000197183	NOL4L	0.559157	0.000652888	1	1	1
ENSG00000169554	ZEB2	0.55922	0.00115756	1	1	1
ENSG00000092068	SLC7A8	0.559279	0.000829686	1	1	1
ENSG00000071859	FAM50A	0.559291	0.00121891	1	1	1
ENSG00000259863	SH3RF3-AS1	0.559294	0.000595421	1	1	1
ENSG00000105767	CADM4	0.559329	0.00867114	1	1	1
ENSG00000260336	ENSG00000260336	0.559381	0.00120637	1	1	1
ENSG00000106789	CORO2A	0.559473	0.000769464	1	1	1
ENSG00000154262	ABCA6	0.55954	0.00127718	1	1	1
ENSG00000070669	ASNS	0.559556	0.00177457	1	1	1
ENSG00000143774	GUK1	0.55966	0.000884218	1	1	1
ENSG00000227082	AC244021.1	0.559676	0.00060558	1	1	1
ENSG00000116983	HPCAL4	0.559784	0.00110774	1	1	1
ENSG00000240253	FAR2P3	0.559834	0.00207239	1	1	1
ENSG00000183092	BEGAIN	0.559908	0.00071625	1	1	1
ENSG00000164172	MOCS2	0.559917	0.000348594	1	1	1
ENSG00000184007	PTP4A2	0.559987	0.00152217	1	1	1
ENSG00000120053	GOT1	0.56005	0.00186874	1	1	1
ENSG00000155761	SPAG17	0.560121	0.0007519	1	1	1
ENSG00000104529	EEF1D	0.56013	0.00127753	1	1	1
ENSG00000168824	NSG1	0.560223	0.00137728	1	1	1
ENSG00000170949	ZNF160	0.560223	0.00117815	1	1	1
ENSG00000128581	IFT22	0.560235	0.00107496	1	1	1
ENSG00000008283	CYB561	0.5603	0.00104811	1	1	1
ENSG00000160973	FOXH1	0.560403	0.000536318	1	1	1
ENSG00000121410	A1BG	0.56053	0.00135048	1	1	1
ENSG00000204186	ZDBF2	0.560611	0.00216407	1	1	1
ENSG00000159352	PSMD4	0.560798	0.000981002	1	1	1
ENSG00000186675	MAGEE2	0.560848	0.00143342	1	0	1
ENSG00000267125	AC012615.3	0.560952	0.000345907	1	1	1
ENSG00000122644	ARL4A	0.560966	0.00196707	1	1	1
ENSG00000133316	WDR74	0.561	0.00146092	1	1	1
ENSG00000100105	PATZ1	0.561004	0.00119671	1	1	1
ENSG00000153558	FBXL2	0.561094	0.00152217	1	1	1
ENSG00000198888	MT-ND1	0.561099	0.000902377	1	0	1
ENSG00000078053	AMPH	0.561113	0.00149065	1	1	1
ENSG00000158292	GPR153	0.561141	0.000773389	1	1	1
ENSG00000066923	STAG3	0.561197	0.00124335	1	1	1
ENSG00000271417	ENSG00000271417	0.561305	0.000852082	1	1	1
ENSG00000131016	AKAP12	0.561313	0.00166018	1	1	1
ENSG00000172889	EGFL7	0.561323	0.000556813	1	1	1
ENSG00000164142	FAM160A1	0.561366	0.000638842	1	1	1
ENSG00000095203	EPB41L4B	0.561459	0.00103004	1	1	1
ENSG00000133142	TCEAL4	0.56147	0.00183116	1	1	1
ENSG00000182165	TP53TG1	0.561533	0.00130886	1	1	1
ENSG00000159259	CHAF1B	0.561576	0.00110253	1	1	1
ENSG00000173327	MAP3K11	0.561807	0.000829686	1	1	1
ENSG00000258702	AL137786.1	0.561814	0.0013343	1	0	1
ENSG00000186854	TRABD2A	0.561898	0.00110659	1	1	1
ENSG00000220804	LINC01881	0.561916	0.000552352	1	1	1
ENSG00000158417	EIF5B	0.561927	0.00101651	1	1	1
ENSG00000272031	ANKRD34A	0.561933	0.00115211	1	1	1
ENSG00000261675	AL022313.4	0.561933	0.0203748	1	1	1
ENSG00000176946	THAP4	0.56199	0.00104996	1	1	1
ENSG00000188906	LRRK2	0.562098	0.00191901	1	1	1
ENSG00000168016	TRANK1	0.562183	0.000954184	1	1	1
ENSG00000173915	ATP5MD	0.562184	0.000449445	1	1	1
ENSG00000254929	AL591684.2	0.562275	0.00132996	1	1	1
ENSG00000097021	ACOT7	0.562284	0.00216869	1	1	1
ENSG00000172350	ABCG4	0.562389	0.0012662	1	1	1
ENSG00000213413	PVRIG	0.562403	0.000419897	1	1	1
ENSG00000141750	STAC2	0.562415	0.000880657	1	1	1
ENSG00000152104	PTPN14	0.562416	0.0016083	1	1	1
ENSG00000104825	NFKBIB	0.562422	0.00269988	1	1	1
ENSG00000115738	ID2	0.562495	0.00176771	1	1	1
ENSG00000100211	CBY1	0.562576	0.0016959	1	1	1
ENSG00000124614	RPS10	0.562587	0.00125465	1	1	1
ENSG00000175115	PACS1	0.562601	0.000399149	1	1	1
ENSG00000128805	ARHGAP22	0.562637	0.0018	1	1	1
ENSG00000133110	POSTN	0.562733	0.00102134	1	0	1
ENSG00000225383	SFTA1P	0.562872	0.000621137	1	1	1
ENSG00000130751	NPAS1	0.562882	0.000771338	1	1	1
ENSG00000215845	TSTD1	0.562885	0.00113523	1	1	1
ENSG00000167468	GPX4	0.562955	0.000657284	1	1	1
ENSG00000110047	EHD1	0.562963	0.000941208	1	1	1
ENSG00000008988	RPS20	0.563051	0.00148651	1	1	1
ENSG00000205323	SARNP	0.563081	0.00180986	1	1	1
ENSG00000152034	MCHR2	0.563105	0.000730878	1	0	1
ENSG00000113749	HRH2	0.56321	0.00153903	1	0	1
ENSG00000147789	ZNF7	0.563215	0.00128558	1	1	1
ENSG00000259758	ENSG00000259758	0.563295	0.000990414	1	1	1
ENSG00000185915	KLHL34	0.563349	0.00154531	1	0	1
ENSG00000198825	INPP5F	0.563352	0.00288446	1	1	1
ENSG00000102078	SLC25A14	0.563364	0.00200371	1	1	1
ENSG00000253485	PCDHGA5	0.563386	0.00126937	1	1	1
ENSG00000186188	FFAR4	0.563443	0.00579998	1	1	1
ENSG00000082126	MPP4	0.563459	0.000400579	1	1	1
ENSG00000125743	SNRPD2	0.563539	0.00207192	1	1	1
ENSG00000051341	POLQ	0.563547	0.00102862	1	0	1
ENSG00000272888	LINC01578	0.563571	0.00149976	1	1	1
ENSG00000169946	ZFPM2	0.563583	0.000513893	1	1	1
ENSG00000241563	CORT	0.563586	0.000699811	1	1	1
ENSG00000005884	ITGA3	0.563598	0.000490691	1	1	1
ENSG00000114383	TUSC2	0.563605	0.000850553	1	1	1
ENSG00000102290	PCDH11X	0.563627	0.0013954	1	1	1
ENSG00000111642	CHD4	0.563669	0.00146059	1	1	1
ENSG00000168763	CNNM3	0.563683	0.000790546	1	1	1
ENSG00000131495	NDUFA2	0.563758	0.00141924	1	1	1
ENSG00000158806	NPM2	0.563786	0.00154295	1	1	1
ENSG00000136854	STXBP1	0.563855	0.00128247	1	1	1
ENSG00000105619	TFPT	0.564052	0.000595421	1	1	1
ENSG00000101331	CCM2L	0.564072	0.000817262	1	1	1
ENSG00000273079	GRIN2B	0.56417	0.00130886	1	0	1
ENSG00000213741	RPS29	0.564211	0.00216618	1	1	1
ENSG00000279573	AC134407.2	0.564242	0.00157226	1	1	1
ENSG00000198899	MT-ATP6	0.564277	0.00121944	1	0	1
ENSG00000140987	ZSCAN32	0.564293	0.000611902	1	1	1
ENSG00000170027	YWHAG	0.564325	0.00148651	1	1	1
ENSG00000160396	HIPK4	0.56439	0.00121944	1	1	1
ENSG00000248592	TMEM110-MUSTN1	0.564447	0.00136635	1	1	1
ENSG00000142408	CACNG8	0.564524	0.00133213	1	1	1
ENSG00000006625	GGCT	0.564555	0.00270414	1	1	1
ENSG00000175581	MRPL48	0.564591	0.00146059	1	1	1
ENSG00000159055	MIS18A	0.564607	0.000866828	1	1	1
ENSG00000135164	DMTF1	0.564634	0.00057429	1	1	1
ENSG00000267007	AC012615.2	0.564658	0.000497961	1	1	1
ENSG00000074706	IPCEF1	0.564662	0.00179549	1	1	1
ENSG00000166704	ZNF606	0.564671	0.00147887	1	1	1
ENSG00000006740	ARHGAP44	0.564679	0.00158834	1	1	1
ENSG00000262049	AC139530.1	0.564686	0.00325063	1	1	1
ENSG00000010244	ZNF207	0.56475	0.000441581	1	1	1
ENSG00000128654	MTX2	0.564922	0.00149065	1	1	1
ENSG00000172232	AZU1	0.564982	0.000416157	1	1	1
ENSG00000197461	PDGFA	0.565	0.00252239	1	1	1
ENSG00000101333	PLCB4	0.565064	0.000716805	1	1	1
ENSG00000253953	PCDHGB4	0.5651	0.00126036	1	1	1
ENSG00000129595	EPB41L4A	0.565258	0.00112882	1	1	1
ENSG00000122779	TRIM24	0.565344	0.0014628	1	1	1
ENSG00000184408	KCND2	0.565386	0.000536318	1	1	1
ENSG00000105357	MYH14	0.56539	0.00564478	1	1	1
ENSG00000134222	PSRC1	0.565521	0.000729922	1	1	1
ENSG00000175426	PCSK1	0.565526	0.001708	1	1	1
ENSG00000215475	SIAH3	0.565549	0.000906936	1	1	1
ENSG00000186710	CFAP73	0.565658	0.00133486	1	1	1
ENSG00000198517	MAFK	0.565756	0.00140636	1	1	1
ENSG00000136942	RPL35	0.565838	0.00152372	1	1	1
ENSG00000068650	ATP11A	0.565861	0.00122526	1	1	1
ENSG00000213760	ATP6V1G2	0.565915	0.00163928	1	1	1
ENSG00000165973	NELL1	0.565963	0.00236836	1	1	1
ENSG00000250686	AL049544.1	0.565974	0.00102517	1	1	1
ENSG00000182196	ARL6IP4	0.566033	0.00241588	1	1	1
ENSG00000108395	TRIM37	0.566063	0.00198559	1	1	1
ENSG00000111696	NT5DC3	0.566092	0.00184307	1	1	1
ENSG00000260878	AC104072.1	0.566148	0.00166132	1	1	1
ENSG00000182389	CACNB4	0.566308	0.00206276	1	1	1
ENSG00000144366	GULP1	0.566389	0.00241588	1	1	1
ENSG00000161016	RPL8	0.56643	0.00176771	1	1	1
ENSG00000203685	STUM	0.56649	0.00432291	1	0	1
ENSG00000108231	LGI1	0.566535	0.00118037	1	1	1
ENSG00000060237	WNK1	0.566597	0.0016083	1	1	1
ENSG00000114573	ATP6V1A	0.566874	0.00269424	1	1	1
ENSG00000165323	FAT3	0.566994	0.00161414	1	1	1
ENSG00000110080	ST3GAL4	0.567023	0.00202118	1	1	1
ENSG00000204052	LRRC73	0.567039	0.00148699	1	1	1
ENSG00000101391	CDK5RAP1	0.567126	0.00132123	1	1	1
ENSG00000175497	DPP10	0.567228	0.00241528	1	1	1
ENSG00000107745	MICU1	0.567237	0.000812862	1	1	1
ENSG00000196990	FAM163B	0.567248	0.00134531	1	1	1
ENSG00000234423	LINC01250	0.567346	0.00146742	1	0	1
ENSG00000134686	PHC2	0.567384	0.00161414	1	1	1
ENSG00000149970	CNKSR2	0.567385	0.000808999	1	1	1
ENSG00000254122	PCDHGB7	0.56741	0.00146052	1	1	1
ENSG00000161980	POLR3K	0.567415	0.000438393	1	1	1
ENSG00000152495	CAMK4	0.567418	0.000744703	1	1	1
ENSG00000116141	MARK1	0.567419	0.00192772	1	1	1
ENSG00000176884	GRIN1	0.567528	0.00103004	1	1	1
ENSG00000267022	AC067968.1	0.567557	0.00148125	1	1	1
ENSG00000170906	NDUFA3	0.567581	0.00136162	1	1	1
ENSG00000273275	AC017083.2	0.567586	0.00119889	1	1	1
ENSG00000144580	CNOT9	0.56761	0.00112897	1	1	1
ENSG00000251369	ZNF550	0.567634	0.000511591	1	1	1
ENSG00000165644	COMTD1	0.567721	0.000636543	1	1	1
ENSG00000064199	SPA17	0.567797	0.0017826	1	1	1
ENSG00000179097	HTR1F	0.567817	0.00146551	1	0	1
ENSG00000119787	ATL2	0.567908	0.00142298	1	1	1
ENSG00000204172	AGAP9	0.567942	0.00126439	1	1	1
ENSG00000276075	AC027682.6	0.567968	0.000687154	1	1	1
ENSG00000268573	AC011815.1	0.568025	0.00063929	1	1	1
ENSG00000260328	AC104024.2	0.568107	0.00130249	1	1	1
ENSG00000175220	ARHGAP1	0.568109	0.00290704	1	1	1
ENSG00000164600	NEUROD6	0.568145	0.00209038	1	1	1
ENSG00000233723	LINC01122	0.568154	0.00152217	1	1	1
ENSG00000152931	PART1	0.568168	0.00171151	1	1	1
ENSG00000257103	LSM14A	0.568179	0.00363322	1	1	1
ENSG00000179796	LRRC3B	0.568383	0.000571148	1	1	1
ENSG00000230417	LINC00595	0.56849	0.00198304	1	0	1
ENSG00000102924	CBLN1	0.568527	0.000786959	1	1	1
ENSG00000105887	MTPN	0.568541	0.00393946	1	1	1
ENSG00000122873	CISD1	0.568543	0.002936	1	1	1
ENSG00000251246	AL691442.1	0.568624	0.00126666	1	1	1
ENSG00000163701	IL17RE	0.568648	0.00103698	1	1	1
ENSG00000277420	AC245407.2	0.568711	0.00137511	1	0	1
ENSG00000186001	LRCH3	0.568733	0.00151895	1	1	1
ENSG00000214253	FIS1	0.568772	0.00127707	1	1	1
ENSG00000198858	R3HDM4	0.568787	0.00121944	1	1	1
ENSG00000198915	RASGEF1A	0.568841	0.0016745	1	1	1
ENSG00000232388	SMIM26	0.568882	0.0105017	1	1	1
ENSG00000260448	LCMT1-AS1	0.568889	0.000571876	1	1	1
ENSG00000257365	FNTB	0.568891	0.00168908	1	1	1
ENSG00000143067	ZNF697	0.568961	0.00216549	1	1	1
ENSG00000248593	DSTNP2	0.568967	0.00127029	1	1	1
ENSG00000117602	RCAN3	0.569102	0.00165026	1	1	1
ENSG00000261496	ENSG00000261496	0.569114	0.00125465	1	1	1
ENSG00000185269	NOTUM	0.569137	0.00104996	1	1	1
ENSG00000151490	PTPRO	0.569174	0.00370754	1	1	1
ENSG00000143878	RHOB	0.569241	0.000704315	1	1	1
ENSG00000105176	URI1	0.56937	0.00119042	1	1	1
ENSG00000028528	SNX1	0.569388	0.0018881	1	1	1
ENSG00000248905	FMN1	0.569397	0.00256256	1	1	1
ENSG00000164122	ASB5	0.56941	0.00117256	1	1	1
ENSG00000082293	COL19A1	0.569435	0.00148125	1	1	1
ENSG00000111249	CUX2	0.569439	0.00131729	1	1	1
ENSG00000099804	CDC34	0.569596	0.000558252	1	1	1
ENSG00000125740	FOSB	0.569612	0.000629575	1	1	1
ENSG00000178974	FBXO34	0.569621	0.00427109	1	1	1
ENSG00000162738	VANGL2	0.569625	0.000759003	1	1	1
ENSG00000236279	CLEC2L	0.569643	0.00146742	1	1	1
ENSG00000214026	MRPL23	0.569683	0.00113419	1	1	1
ENSG00000114391	RPL24	0.569694	0.00163443	1	1	1
ENSG00000168734	PKIG	0.569704	0.00120984	1	1	1
ENSG00000143196	DPT	0.56986	0.000950842	1	1	1
ENSG00000048991	R3HDM1	0.569874	0.00133229	1	1	1
ENSG00000251011	TMEM108-AS1	0.569901	0.00130195	1	0	1
ENSG00000171714	ANO5	0.569945	0.00188941	1	1	1
ENSG00000124772	CPNE5	0.569967	0.00195315	1	1	1
ENSG00000162992	NEUROD1	0.570046	0.000814599	1	1	1
ENSG00000243710	CFAP57	0.570116	0.000792454	1	1	1
ENSG00000143995	MEIS1	0.570131	0.00150238	1	1	1
ENSG00000198963	RORB	0.570284	0.00159044	1	1	1
ENSG00000111832	RWDD1	0.570304	0.00172484	1	1	1
ENSG00000136999	NOV	0.570307	0.00155688	1	0	1
ENSG00000248115	AC023154.1	0.570319	0.00220538	1	0	1
ENSG00000137656	BUD13	0.570375	0.00484778	1	1	1
ENSG00000173404	INSM1	0.570381	0.00105452	1	1	1
ENSG00000143198	MGST3	0.570391	0.000869486	1	1	1
ENSG00000196090	PTPRT	0.570397	0.00193073	1	0	1
ENSG00000132294	EFR3A	0.570442	0.00142696	1	1	1
ENSG00000275004	ZNF280B	0.570442	0.00228926	1	1	1
ENSG00000174307	PHLDA3	0.570446	0.00179609	1	1	1
ENSG00000147804	SLC39A4	0.570506	0.00128299	1	1	1
ENSG00000164048	ZNF589	0.570513	0.00137183	1	1	1
ENSG00000145808	ADAMTS19	0.570552	0.00118958	1	1	1
ENSG00000149926	FAM57B	0.570566	0.000965031	1	1	1
ENSG00000268182	SMIM17	0.570567	0.00149976	1	1	1
ENSG00000248309	MEF2C-AS1	0.570601	0.00151944	1	1	1
ENSG00000196510	ANAPC7	0.570644	0.000840557	1	1	1
ENSG00000183340	JRKL	0.570826	0.000610679	1	1	1
ENSG00000179271	GADD45GIP1	0.570831	0.00130431	1	1	1
ENSG00000009413	REV3L	0.570877	0.00136635	1	1	1
ENSG00000240682	ISY1	0.570916	0.001708	1	1	1
ENSG00000047579	DTNBP1	0.570968	0.000662844	1	1	1
ENSG00000198886	MT-ND4	0.570978	0.00191521	1	0	1
ENSG00000116288	PARK7	0.57102	0.00144407	1	1	1
ENSG00000117713	ARID1A	0.571075	0.000590066	1	1	1
ENSG00000211459	MT-RNR1	0.571104	0.00279849	1	0	1
ENSG00000196683	TOMM7	0.571169	0.00121891	1	1	1
ENSG00000164484	TMEM200A	0.571183	0.00260342	1	1	1
ENSG00000189212	DPY19L2P1	0.571346	0.00105066	1	1	1
ENSG00000179262	RAD23A	0.57135	0.00546952	1	1	1
ENSG00000129993	CBFA2T3	0.571354	0.000638842	1	1	1
ENSG00000137642	SORL1	0.571364	0.00166018	1	1	1
ENSG00000112893	MAN2A1	0.571381	0.000841462	1	1	1
ENSG00000163833	FBXO40	0.571382	0.00157512	1	1	1
ENSG00000159248	GJD2	0.571783	0.00363322	1	1	1
ENSG00000131069	ACSS2	0.571785	0.00194375	1	1	1
ENSG00000048405	ZNF800	0.571803	0.000549094	1	1	1
ENSG00000196950	SLC39A10	0.571853	0.00334403	1	1	1
ENSG00000279159	AC003681.1	0.571865	0.00252239	1	1	1
ENSG00000279500	AC108704.2	0.571934	0.00175935	1	1	1
ENSG00000170889	RPS9	0.571946	0.00208504	1	1	1
ENSG00000170873	MTSS1	0.572129	0.002171	1	1	1
ENSG00000215271	HOMEZ	0.572182	0.00273041	1	1	1
ENSG00000100099	HPS4	0.572199	0.00114174	1	1	1
ENSG00000177614	PGBD5	0.572202	0.00216201	1	1	1
ENSG00000147416	ATP6V1B2	0.572244	0.001875	1	1	1
ENSG00000185774	KCNIP4	0.572272	0.00208145	1	1	1
ENSG00000100473	COCH	0.572358	0.00121452	1	1	1
ENSG00000155846	PPARGC1B	0.572372	0.00133213	1	1	1
ENSG00000175229	GAL3ST3	0.572417	0.00209398	1	1	1
ENSG00000110717	NDUFS8	0.572424	0.00218303	1	1	1
ENSG00000174514	MFSD4A	0.572577	0.00261242	1	1	1
ENSG00000107077	KDM4C	0.572718	0.00139441	1	1	1
ENSG00000144285	SCN1A	0.572742	0.00186199	1	1	1
ENSG00000278730	AC005332.7	0.572758	0.00166132	1	1	1
ENSG00000154548	SRSF12	0.572824	0.00224619	1	1	1
ENSG00000261884	AC040162.1	0.572854	0.00114806	1	1	1
ENSG00000167118	URM1	0.572878	0.0021953	1	1	1
ENSG00000141456	PELP1	0.572951	0.000720913	1	1	1
ENSG00000171224	FAM241B	0.572953	0.00130249	1	1	1
ENSG00000130733	YIPF2	0.573069	0.00196893	1	1	1
ENSG00000106400	ZNHIT1	0.573126	0.00476598	1	1	1
ENSG00000112964	GHR	0.573156	0.000982966	1	1	1
ENSG00000197056	ZMYM1	0.573181	0.000993902	1	1	1
ENSG00000273287	AL008718.2	0.573237	0.00105587	1	1	1
ENSG00000165338	HECTD2	0.573259	0.00275251	1	1	1
ENSG00000182732	RGS6	0.573278	0.00152217	1	1	1
ENSG00000130724	CHMP2A	0.573363	0.00194337	1	1	1
ENSG00000151948	GLT1D1	0.57337	0.00198304	1	1	1
ENSG00000125485	DDX31	0.573391	0.00186055	1	1	1
ENSG00000262304	AC027796.3	0.573461	0.00299182	1	1	1
ENSG00000139899	CBLN3	0.573522	0.00178945	1	1	1
ENSG00000122435	TRMT13	0.573539	0.00301249	1	1	1
ENSG00000065054	SLC9A3R2	0.573545	0.00182416	1	1	1
ENSG00000204856	FAM216A	0.573614	0.00275367	1	1	1
ENSG00000132478	UNK	0.573634	0.00340736	1	1	1
ENSG00000142546	NOSIP	0.57366	0.000664408	1	1	1
ENSG00000120251	GRIA2	0.573684	0.00276469	1	1	1
ENSG00000279332	AC090772.4	0.573693	0.00105066	1	1	1
ENSG00000090534	THPO	0.573694	0.000955646	1	1	1
ENSG00000060688	SNRNP40	0.573821	0.00215891	1	1	1
ENSG00000213585	VDAC1	0.573828	0.00322231	1	1	1
ENSG00000177410	ZFAS1	0.573869	0.00207641	1	1	1
ENSG00000130477	UNC13A	0.57394	0.00191183	1	1	1
ENSG00000255498	AC068385.1	0.57398	0.00251286	1	1	1
ENSG00000082515	MRPL22	0.574057	0.00060558	1	1	1
ENSG00000106852	LHX6	0.574076	0.00179493	1	1	1
ENSG00000141098	GFOD2	0.574124	0.000759892	1	1	1
ENSG00000132938	MTUS2	0.574133	0.00217071	1	1	1
ENSG00000074527	NTN4	0.574141	0.00321515	1	1	1
ENSG00000185909	KLHDC8B	0.574141	0.00108631	1	1	1
ENSG00000112306	RPS12	0.5742	0.0023685	1	1	1
ENSG00000171448	ZBTB26	0.574219	0.000650751	1	1	1
ENSG00000260081	AF274858.1	0.574239	0.00163857	1	1	1
ENSG00000125954	CHURC1-FNTB	0.574339	0.00114224	1	1	1
ENSG00000173757	STAT5B	0.57447	0.00164311	1	1	1
ENSG00000133134	BEX2	0.574494	0.00212444	1	1	1
ENSG00000067842	ATP2B3	0.574541	0.00203446	1	1	1
ENSG00000186260	MKL2	0.57457	0.00303652	1	1	1
ENSG00000182329	KIAA2012	0.574582	0.00134487	1	1	1
ENSG00000183828	NUDT14	0.574724	0.00152435	1	1	1
ENSG00000159450	TCHH	0.574814	0.00229344	1	0	1
ENSG00000176697	BDNF	0.575064	0.00209363	1	1	1
ENSG00000185361	TNFAIP8L1	0.575168	0.00242342	1	1	1
ENSG00000171004	HS6ST2	0.575263	0.00221151	1	1	1
ENSG00000185518	SV2B	0.575293	0.0026223	1	1	1
ENSG00000115350	POLE4	0.575302	0.00115042	1	1	1
ENSG00000212907	MT-ND4L	0.575325	0.0015834	1	1	1
ENSG00000270231	NBPF8	0.575442	0.000696445	1	1	1
ENSG00000114923	SLC4A3	0.575444	0.00200912	1	1	1
ENSG00000102931	ARL2BP	0.575484	0.000759346	1	1	1
ENSG00000038295	TLL1	0.575498	0.00112882	1	1	1
ENSG00000171813	PWWP2B	0.575596	0.00133229	1	1	1
ENSG00000146858	ZC3HAV1L	0.575645	0.00179148	1	1	1
ENSG00000106415	GLCCI1	0.575651	0.00110253	1	1	1
ENSG00000269621	AL589765.7	0.575676	0.00166943	1	1	1
ENSG00000116544	DLGAP3	0.575788	0.00166867	1	1	1
ENSG00000231764	DLX6-AS1	0.575869	0.00266599	1	0	1
ENSG00000138639	ARHGAP24	0.575881	0.00166943	1	1	1
ENSG00000080819	CPOX	0.575951	0.00259461	1	1	1
ENSG00000145087	STXBP5L	0.576	0.0027826	1	1	1
ENSG00000184731	FAM110C	0.576015	0.00101843	1	1	1
ENSG00000100225	FBXO7	0.576063	0.00221122	1	1	1
ENSG00000002330	BAD	0.576075	0.00127166	1	1	1
ENSG00000055950	MRPL43	0.576109	0.00110851	1	1	1
ENSG00000128285	MCHR1	0.576193	0.00256554	1	1	1
ENSG00000106328	FSCN3	0.576283	0.00226134	1	1	1
ENSG00000197106	SLC6A17	0.576317	0.00211717	1	1	1
ENSG00000100092	SH3BP1	0.576392	0.00297438	1	1	1
ENSG00000260918	AC107398.3	0.57648	0.00207192	1	1	1
ENSG00000072501	SMC1A	0.576491	0.00180686	1	1	1
ENSG00000107223	EDF1	0.576554	0.00407978	1	1	1
ENSG00000189129	PLAC9	0.576561	0.000950842	1	1	1
ENSG00000242485	MRPL20	0.576574	0.00109733	1	1	1
ENSG00000279592	AC010653.2	0.576589	0.00124868	1	1	1
ENSG00000166159	LRTM2	0.576611	0.00238691	1	1	1
ENSG00000175352	NRIP3	0.576637	0.002171	1	1	1
ENSG00000206557	TRIM71	0.576667	0.00143907	1	1	1
ENSG00000140391	TSPAN3	0.576812	0.00299789	1	1	1
ENSG00000125970	RALY	0.576821	0.00390754	1	1	1
ENSG00000104419	NDRG1	0.576853	0.00287925	1	1	1
ENSG00000185133	INPP5J	0.576892	0.0040242	1	1	1
ENSG00000142676	RPL11	0.576895	0.00314697	1	1	1
ENSG00000096060	FKBP5	0.576913	0.00350135	1	1	1
ENSG00000112796	ENPP5	0.576922	0.00243591	1	1	1
ENSG00000111752	PHC1	0.576926	0.00241528	1	1	1
ENSG00000161544	CYGB	0.576963	0.00180002	1	1	1
ENSG00000135083	CCNJL	0.577025	0.0016621	1	1	1
ENSG00000171724	VAT1L	0.577031	0.0029168	1	1	1
ENSG00000123352	SPATS2	0.57706	0.00191927	1	1	1
ENSG00000101158	NELFCD	0.577129	0.00216549	1	1	1
ENSG00000164402	SEPT8	0.577231	0.00203623	1	1	1
ENSG00000164270	HTR4	0.577256	0.00239397	1	0	1
ENSG00000167889	MGAT5B	0.57728	0.0016655	1	1	1
ENSG00000111596	CNOT2	0.577294	0.0023685	1	1	1
ENSG00000101190	TCFL5	0.577393	0.00216083	1	1	1
ENSG00000118495	PLAGL1	0.57742	0.00121051	1	1	1
ENSG00000160401	CFAP157	0.577548	0.00133177	1	1	1
ENSG00000023171	GRAMD1B	0.577587	0.0012662	1	1	1
ENSG00000259153	AC004816.1	0.577603	0.00161414	1	1	1
ENSG00000131018	SYNE1	0.577675	0.000747615	1	1	1
ENSG00000131969	ABHD12B	0.577788	0.00399709	1	1	1
ENSG00000249348	UGDH-AS1	0.577976	0.00149065	1	1	1
ENSG00000141404	GNAL	0.578001	0.00380542	1	1	1
ENSG00000065154	OAT	0.578034	0.0033001	1	1	1
ENSG00000203727	SAMD5	0.578036	0.00147481	1	1	1
ENSG00000253230	LINC00599	0.578056	0.000910371	1	1	1
ENSG00000260465	AC018557.1	0.578106	0.00235992	1	1	1
ENSG00000276547	PCDHGB5	0.578109	0.00332224	1	1	1
ENSG00000009709	PAX7	0.578118	0.00231233	1	0	1
ENSG00000129250	KIF1C	0.578181	0.00217071	1	1	1
ENSG00000261147	AC091167.2	0.578201	0.00633592	1	1	1
ENSG00000170653	ATF7	0.578274	0.00240311	1	1	1
ENSG00000112339	HBS1L	0.578343	0.00266136	1	1	1
ENSG00000105583	WDR83OS	0.578354	0.00112499	1	1	1
ENSG00000258674	AC011448.1	0.578381	0.00197617	1	1	1
ENSG00000174446	SNAPC5	0.578404	0.000965574	1	1	1
ENSG00000183722	LHFPL6	0.57848	0.000958463	1	1	1
ENSG00000119865	CNRIP1	0.578585	0.0046209	1	1	1
ENSG00000181350	LRRC75A	0.578587	0.000954351	1	1	1
ENSG00000237440	ZNF737	0.57862	0.00173454	1	1	1
ENSG00000260931	ENSG00000260931	0.578625	0.00243539	1	1	1
ENSG00000101134	DOK5	0.578645	0.00231867	1	1	1
ENSG00000225507	AC069282.1	0.578654	0.00147514	1	1	1
ENSG00000113845	TIMMDC1	0.578673	0.00301562	1	1	1
ENSG00000233175	AC008105.1	0.578684	0.00123644	1	1	1
ENSG00000101846	STS	0.578688	0.0023685	1	1	1
ENSG00000134825	TMEM258	0.578699	0.00615279	1	1	1
ENSG00000237515	SHISA9	0.578703	0.00633592	1	1	1
ENSG00000020922	MRE11	0.578712	0.00153982	1	1	1
ENSG00000231340	ACTG1P10	0.578733	0.00137024	1	1	1
ENSG00000079931	MOXD1	0.578811	0.00203446	1	1	1
ENSG00000113763	UNC5A	0.578828	0.00160262	1	1	1
ENSG00000130695	CEP85	0.578867	0.00240237	1	1	1
ENSG00000278948	AL031587.5	0.57892	0.00349358	1	1	1
ENSG00000145431	PDGFC	0.578968	0.000879777	1	1	1
ENSG00000105323	HNRNPUL1	0.578985	0.00344779	1	1	1
ENSG00000081377	CDC14B	0.579021	0.00152372	1	1	1
ENSG00000268120	AC010336.3	0.579065	0.00216869	1	1	1
ENSG00000128185	DGCR6L	0.579101	0.00176511	1	1	1
ENSG00000164082	GRM2	0.579103	0.00248535	1	1	1
ENSG00000186160	CYP4Z1	0.579111	0.00234322	1	0	1
ENSG00000196724	ZNF418	0.579138	0.00198249	1	1	1
ENSG00000143786	CNIH3	0.57914	0.003479	1	1	1
ENSG00000204599	TRIM39	0.579165	0.00353399	1	1	1
ENSG00000140807	NKD1	0.579167	0.000801962	1	1	1
ENSG00000280173	AC104447.1	0.579236	0.00217497	1	1	1
ENSG00000076826	CAMSAP3	0.579244	0.00192227	1	1	1
ENSG00000164442	CITED2	0.579362	0.00158487	1	1	1
ENSG00000186212	SOWAHB	0.579396	0.00159542	1	1	1
ENSG00000242950	ERVW-1	0.57941	0.00147184	1	1	1
ENSG00000116584	ARHGEF2	0.579442	0.00235828	1	1	1
ENSG00000180828	BHLHE22	0.579479	0.00207784	1	1	1
ENSG00000183454	GRIN2A	0.579538	0.00263715	1	1	1
ENSG00000274810	NPHP3-ACAD11	0.579539	0.000979842	1	1	1
ENSG00000273108	AL121929.2	0.57967	0.00134618	1	1	1
ENSG00000272072	AC004492.1	0.579706	0.00144284	1	1	1
ENSG00000231731	AC010976.1	0.579707	0.0010504	1	1	1
ENSG00000112218	GPR63	0.57971	0.00267607	1	1	1
ENSG00000107281	NPDC1	0.579805	0.00246458	1	1	1
ENSG00000140526	ABHD2	0.579806	0.00257471	1	1	1
ENSG00000150051	MKX	0.579807	0.00271623	1	1	1
ENSG00000276644	DACH1	0.579836	0.00280924	1	1	1
ENSG00000112137	PHACTR1	0.579887	0.00174681	1	1	1
ENSG00000147133	TAF1	0.579898	0.0050183	1	1	1
ENSG00000122691	TWIST1	0.579971	0.00274403	1	0	1
ENSG00000152082	MZT2B	0.580001	0.00115756	1	1	1
ENSG00000221983	UBA52	0.580022	0.00297962	1	1	1
ENSG00000100554	ATP6V1D	0.580051	0.000917504	1	1	1
ENSG00000182247	UBE2E2	0.580078	0.00390394	1	1	1
ENSG00000164919	COX6C	0.58011	0.00153511	1	1	1
ENSG00000170776	AKAP13	0.580125	0.00152691	1	1	1
ENSG00000177875	CCDC184	0.580183	0.00282318	1	1	1
ENSG00000152583	SPARCL1	0.58024	0.00233821	1	0	1
ENSG00000117155	SSX2IP	0.580297	0.00314666	1	1	1
ENSG00000226318	RPS3AP38	0.580333	0.00175079	1	0	1
ENSG00000125901	MRPS26	0.580357	0.00129233	1	1	1
ENSG00000155657	TTN	0.580359	0.00108059	1	1	1
ENSG00000158526	TSR2	0.580368	0.00229822	1	1	1
ENSG00000111452	ADGRD1	0.580378	0.00294605	1	1	1
ENSG00000174136	RGMB	0.580383	0.00348909	1	1	1
ENSG00000162631	NTNG1	0.58051	0.0017691	1	1	1
ENSG00000138617	PARP16	0.580517	0.00191087	1	1	1
ENSG00000186047	DLEU7	0.580534	0.00297438	1	1	1
ENSG00000099849	RASSF7	0.580618	0.000859731	1	1	1
ENSG00000233885	YEATS2-AS1	0.580673	0.0016959	1	1	1
ENSG00000181744	C3orf58	0.580692	0.00162938	1	1	1
ENSG00000138434	SSFA2	0.580698	0.002171	1	1	1
ENSG00000157911	PEX10	0.580841	0.00140352	1	1	1
ENSG00000213397	HAUS7	0.580855	0.00270414	1	1	1
ENSG00000107742	SPOCK2	0.580865	0.00317893	1	1	1
ENSG00000241360	PDXP	0.580901	0.00204965	1	1	1
ENSG00000171858	RPS21	0.580916	0.00139435	1	1	1
ENSG00000149541	B3GAT3	0.580997	0.00288812	1	1	1
ENSG00000258724	AC105001.2	0.581102	0.000887501	1	1	1
ENSG00000128524	ATP6V1F	0.58117	0.000952348	1	1	1
ENSG00000280165	PCDH20	0.581195	0.00503365	1	1	1
ENSG00000154975	CA10	0.581277	0.00163443	1	1	1
ENSG00000246451	AL049840.1	0.581293	0.00168908	1	1	1
ENSG00000143862	ARL8A	0.581399	0.00394345	1	1	1
ENSG00000002746	HECW1	0.58141	0.00314373	1	1	1
ENSG00000121851	POLR3GL	0.581469	0.00225993	1	1	1
ENSG00000276148	AC084824.5	0.581502	0.00242633	1	1	1
ENSG00000112038	OPRM1	0.581503	0.00114008	1	0	1
ENSG00000166501	PRKCB	0.58163	0.00392876	1	0	1
ENSG00000258824	AL122035.1	0.581734	0.000869486	1	1	1
ENSG00000155111	CDK19	0.581803	0.00392598	1	1	1
ENSG00000102572	STK24	0.581807	0.00320407	1	1	1
ENSG00000159164	SV2A	0.581875	0.00338809	1	1	1
ENSG00000104413	ESRP1	0.581895	0.00287551	1	0	1
ENSG00000186566	GPATCH8	0.581897	0.00154379	1	1	1
ENSG00000079156	OSBPL6	0.581968	0.00261053	1	1	1
ENSG00000125826	RBCK1	0.582008	0.00303245	1	1	1
ENSG00000004660	CAMKK1	0.582041	0.00280136	1	1	1
ENSG00000138759	FRAS1	0.58207	0.00298418	1	0	1
ENSG00000163161	ERCC3	0.582096	0.00104903	1	1	1
ENSG00000115828	QPCT	0.582117	0.00737584	1	1	1
ENSG00000131116	ZNF428	0.582307	0.00303245	1	1	1
ENSG00000136003	ISCU	0.582341	0.00201714	1	1	1
ENSG00000170445	HARS	0.582367	0.00105092	1	1	1
ENSG00000100603	SNW1	0.582487	0.0014628	1	1	1
ENSG00000070476	ZXDC	0.58252	0.00272549	1	1	1
ENSG00000273025	AC009690.3	0.582534	0.00219917	1	1	1
ENSG00000072315	TRPC5	0.58256	0.00218776	1	1	1
ENSG00000196562	SULF2	0.582562	0.00147481	1	1	1
ENSG00000214367	HAUS3	0.582686	0.00136635	1	1	1
ENSG00000197555	SIPA1L1	0.582717	0.00321128	1	1	1
ENSG00000134207	SYT6	0.582795	0.00119647	1	1	1
ENSG00000182256	GABRG3	0.582831	0.00299182	1	1	1
ENSG00000162069	BICDL2	0.58285	0.00350083	1	1	1
ENSG00000153814	JAZF1	0.582874	0.00698434	1	1	1
ENSG00000163075	CFAP221	0.582905	0.00240473	1	1	1
ENSG00000160688	FLAD1	0.582943	0.00152217	1	1	1
ENSG00000097096	SYDE2	0.582953	0.00342501	1	1	1
ENSG00000188559	RALGAPA2	0.582981	0.00165451	1	1	1
ENSG00000120217	CD274	0.583155	0.00134996	1	1	1
ENSG00000152595	MEPE	0.583227	0.00349358	1	1	1
ENSG00000128045	RASL11B	0.583246	0.00306604	1	0	1
ENSG00000076924	XAB2	0.583351	0.00239313	1	1	1
ENSG00000179195	ZNF664	0.583379	0.00289993	1	1	1
ENSG00000206579	XKR4	0.58339	0.00685721	1	0	1
ENSG00000159086	PAXBP1	0.583421	0.00470847	1	1	1
ENSG00000183091	NEB	0.583455	0.000929213	1	1	1
ENSG00000161981	SNRNP25	0.583462	0.00141575	1	1	1
ENSG00000186468	RPS23	0.583487	0.00258479	1	1	1
ENSG00000188848	BEND4	0.58352	0.00300908	1	0	1
ENSG00000114544	SLC41A3	0.583559	0.00136635	1	1	1
ENSG00000213619	NDUFS3	0.583564	0.00115542	1	1	1
ENSG00000235436	DPY19L2P4	0.58357	0.00242342	1	1	1
ENSG00000123119	NECAB1	0.583609	0.0029709	1	1	1
ENSG00000155287	SLC25A28	0.583756	0.00311213	1	1	1
ENSG00000140798	ABCC12	0.583863	0.00282316	1	0	1
ENSG00000156482	RPL30	0.583934	0.00378387	1	1	1
ENSG00000079102	RUNX1T1	0.583943	0.00139435	1	1	1
ENSG00000142634	EFHD2	0.583986	0.00402255	1	1	1
ENSG00000144724	PTPRG	0.584002	0.00305276	1	1	1
ENSG00000248859	LINC01574	0.584102	0.00204868	1	1	1
ENSG00000115207	GTF3C2	0.584204	0.00259809	1	1	1
ENSG00000076351	SLC46A1	0.584209	0.00130195	1	1	1
ENSG00000143952	VPS54	0.584238	0.00307595	1	1	1
ENSG00000100568	VTI1B	0.584374	0.00295898	1	1	1
ENSG00000153815	CMIP	0.584423	0.00303334	1	1	1
ENSG00000198938	MT-CO3	0.58444	0.00199876	1	0	1
ENSG00000109475	RPL34	0.584463	0.00229822	1	1	1
ENSG00000120322	PCDHB8	0.584497	0.00210496	1	1	1
ENSG00000165028	NIPSNAP3B	0.584594	0.00249648	1	1	1
ENSG00000210082	MT-RNR2	0.584615	0.00475698	1	0	1
ENSG00000151414	NEK7	0.584623	0.00263332	1	1	1
ENSG00000176225	RTTN	0.584644	0.00247702	1	1	1
ENSG00000235954	TTC28-AS1	0.584681	0.00143891	1	1	1
ENSG00000053524	MCF2L2	0.584761	0.00920264	1	1	1
ENSG00000187239	FNBP1	0.584849	0.00280136	1	1	1
ENSG00000108107	RPL28	0.584934	0.00445063	1	1	1
ENSG00000256542	AC148477.2	0.58497	0.00129784	1	1	1
ENSG00000261732	AL031708.1	0.584988	0.0023685	1	1	1
ENSG00000170248	PDCD6IP	0.585021	0.00101607	1	1	1
ENSG00000174917	C19orf70	0.585035	0.00190989	1	1	1
ENSG00000120253	NUP43	0.585046	0.00367157	1	1	1
ENSG00000174437	ATP2A2	0.585093	0.00477508	1	1	1
ENSG00000173660	UQCRH	0.585094	0.00177726	1	1	1
ENSG00000139985	ADAM21	0.585162	0.00303245	1	0	1
ENSG00000138468	SENP7	0.585203	0.00117047	1	1	1
ENSG00000119720	NRDE2	0.585234	0.00297962	1	1	1
ENSG00000171456	ASXL1	0.585238	0.00380083	1	1	1
ENSG00000001167	NFYA	0.5853	0.002171	1	1	1
ENSG00000148450	MSRB2	0.585351	0.00380768	1	1	1
ENSG00000101003	GINS1	0.585539	0.00234498	1	1	1
ENSG00000243888	AL355140.1	0.585557	0.00361531	1	1	1
ENSG00000187240	DYNC2H1	0.585564	0.00154313	1	1	1
ENSG00000178234	GALNT11	0.585631	0.00430221	1	1	1
ENSG00000127540	UQCR11	0.585658	0.00183769	1	1	1
ENSG00000128594	LRRC4	0.585676	0.00302978	1	1	1
ENSG00000113361	CDH6	0.585702	0.00353399	1	1	1
ENSG00000169621	APLF	0.585714	0.00204178	1	0	1
ENSG00000273420	AC008738.7	0.585755	0.00157715	1	1	1
ENSG00000203993	ARRDC1-AS1	0.585951	0.00303262	1	1	1
ENSG00000115290	GRB14	0.585973	0.0030001	1	1	1
ENSG00000003393	ALS2	0.586008	0.00192413	1	1	1
ENSG00000204220	PFDN6	0.586034	0.00347945	1	1	1
ENSG00000161021	MAML1	0.586035	0.00590812	1	1	1
ENSG00000130779	CLIP1	0.586074	0.00175541	1	1	1
ENSG00000249158	PCDHA11	0.586077	0.00427109	1	1	1
ENSG00000184209	SNRNP35	0.586094	0.00430221	1	1	1
ENSG00000136908	DPM2	0.586139	0.00664293	1	1	1
ENSG00000165716	FAM69B	0.586152	0.00258479	1	1	1
ENSG00000109790	KLHL5	0.586159	0.00305276	1	1	1
ENSG00000162664	ZNF326	0.586173	0.00276144	1	1	1
ENSG00000265787	CYP4F35P	0.586177	0.00218776	1	1	1
ENSG00000167912	AC090152.1	0.586199	0.00267607	1	1	1
ENSG00000243725	TTC4	0.58626	0.00248535	1	1	1
ENSG00000127914	AKAP9	0.586335	0.0010079	1	1	1
ENSG00000166508	MCM7	0.586365	0.00297438	1	1	1
ENSG00000165678	GHITM	0.586444	0.00620297	1	1	1
ENSG00000110076	NRXN2	0.586457	0.00160198	1	1	1
ENSG00000116747	TROVE2	0.586462	0.00163392	1	1	1
ENSG00000120645	IQSEC3	0.586482	0.0029399	1	1	1
ENSG00000073150	PANX2	0.586565	0.0019244	1	1	1
ENSG00000154945	ANKRD40	0.586612	0.0026399	1	1	1
ENSG00000189420	ZFP92	0.586695	0.00402373	1	0	1
ENSG00000135127	BICDL1	0.586789	0.00261879	1	1	1
ENSG00000142534	RPS11	0.58685	0.00301562	1	1	1
ENSG00000205268	PDE7A	0.586876	0.00610589	1	1	1
ENSG00000198315	ZKSCAN8	0.586999	0.00166132	1	1	1
ENSG00000171695	LKAAEAR1	0.587015	0.00168908	1	1	1
ENSG00000125869	LAMP5	0.587041	0.00391928	1	1	1
ENSG00000248367	AC008610.1	0.58707	0.00163443	1	1	1
ENSG00000011143	MKS1	0.58714	0.00303262	1	1	1
ENSG00000166860	ZBTB39	0.587144	0.00105092	1	1	1
ENSG00000182628	SKA2	0.587152	0.00427109	1	1	1
ENSG00000173113	TRMT112	0.587155	0.00298287	1	1	1
[truncated: 8,017 more rows]

## Sheet: PSP Union DV Genes BY
	gene_symbol	SD_ratio	adj_pval	indicator_clrDV	indicator_MDSeq	indicator_gamlss_BY
ENSG00000176165	FOXG1	0.276897	1.22519e-12	1	1	1
ENSG00000198883	PNMA5	0.31994	6.73061e-09	1	1	1
ENSG00000105376	ICAM5	0.325755	2.29884e-09	1	1	1
ENSG00000006116	CACNG3	0.329913	6.73061e-09	1	1	1
ENSG00000214425	LRRC37A4P	0.343209	6.73061e-09	1	1	1
ENSG00000273540	AGBL1	0.345489	2.95225e-08	1	1	1
ENSG00000133101	CCNA1	0.347448	8.50727e-09	1	1	1
ENSG00000138207	RBP4	0.350578	1.93819e-08	1	1	1
ENSG00000147041	SYTL5	0.354343	2.85139e-08	1	1	1
ENSG00000129990	SYT5	0.355912	2.99027e-08	1	1	1
ENSG00000187094	CCK	0.35898	2.85139e-08	1	1	1
ENSG00000129682	FGF13	0.359772	7.34515e-09	1	1	1
ENSG00000236668	AC006450.3	0.36347	2.99027e-08	1	1	1
ENSG00000134343	ANO3	0.364322	1.49855e-08	1	1	1
ENSG00000169884	WNT10B	0.367237	2.99027e-08	1	1	1
ENSG00000181418	DDN	0.369116	2.85139e-08	1	1	1
ENSG00000132026	RTBDN	0.374177	9.12169e-08	1	1	1
ENSG00000131187	F12	0.375593	7.54812e-08	1	1	1
ENSG00000119782	FKBP1B	0.376787	9.12169e-08	1	1	1
ENSG00000239911	PRKAG2-AS1	0.379736	1.68359e-07	1	1	1
ENSG00000113100	CDH9	0.380865	2.02507e-08	1	1	1
ENSG00000178773	CPNE7	0.381171	8.90419e-08	1	1	1
ENSG00000259964	THSD4-AS1	0.381281	7.65038e-08	1	1	1
ENSG00000185149	NPY2R	0.384569	1.22707e-07	1	1	1
ENSG00000178531	CTXN1	0.386453	1.3767e-07	1	1	1
ENSG00000261340	LINC01616	0.386499	1.43109e-07	1	1	1
ENSG00000103528	SYT17	0.387609	2.14228e-07	1	1	1
ENSG00000104888	SLC17A7	0.388539	1.81684e-07	1	1	1
ENSG00000249436	AC008780.2	0.388978	9.12169e-08	1	1	1
ENSG00000164112	TMEM155	0.389528	2.48663e-07	1	1	1
ENSG00000115194	SLC30A3	0.391035	1.3767e-07	1	1	1
ENSG00000154146	NRGN	0.39108	1.43109e-07	1	1	1
ENSG00000129951	PLPPR3	0.391349	2.35458e-07	1	1	1
ENSG00000136535	TBR1	0.391389	9.12169e-08	1	1	1
ENSG00000250579	AC022424.1	0.394037	4.36127e-08	1	1	1
ENSG00000135625	EGR4	0.394091	9.12169e-08	1	1	1
ENSG00000132821	VSTM2L	0.3975	3.10215e-07	1	1	1
ENSG00000186297	GABRA5	0.397573	1.3925e-07	1	1	1
ENSG00000105419	MEIS3	0.397596	2.76882e-07	1	1	1
ENSG00000183654	MARCH11	0.399168	9.12169e-08	1	1	1
ENSG00000255301	AP002893.1	0.400167	3.92096e-07	1	1	1
ENSG00000176956	LY6H	0.400623	2.26104e-07	1	1	1
ENSG00000112183	RBM24	0.403318	4.96487e-07	1	1	1
ENSG00000074317	SNCB	0.403528	4.15827e-07	1	1	1
ENSG00000161082	CELF5	0.403599	3.76739e-07	1	1	1
ENSG00000145451	GLRA3	0.404975	6.51975e-07	1	1	1
ENSG00000171617	ENC1	0.404979	1.81684e-07	1	1	1
ENSG00000169427	KCNK9	0.405453	1.3767e-07	1	1	1
ENSG00000237732	AC010980.1	0.405554	3.76739e-07	1	1	1
ENSG00000233508	AL021395.1	0.40632	2.26104e-07	1	1	1
ENSG00000267034	AC010980.2	0.406732	4.6541e-07	1	1	1
ENSG00000196353	CPNE4	0.407739	3.76739e-07	1	1	1
ENSG00000179388	EGR3	0.408327	3.88226e-07	1	1	1
ENSG00000249550	LINC01234	0.409752	2.33954e-07	1	1	1
ENSG00000150459	SAP18	0.410056	8.72047e-07	1	1	1
ENSG00000008056	SYN1	0.41007	2.25744e-07	1	1	1
ENSG00000223572	CKMT1A	0.410713	7.24321e-07	1	1	1
ENSG00000164794	KCNV1	0.411242	3.37942e-07	1	1	1
ENSG00000159409	CELF3	0.411381	5.80596e-07	1	1	1
ENSG00000182870	GALNT9	0.411776	5.36739e-07	1	1	1
ENSG00000141668	CBLN2	0.413329	9.21117e-07	1	1	1
ENSG00000139200	PIANP	0.41388	1.07456e-06	1	1	1
ENSG00000132639	SNAP25	0.414096	7.18826e-07	1	1	1
ENSG00000183186	C2CD4C	0.415448	5.80596e-07	1	1	1
ENSG00000171450	CDK5R2	0.416474	1.00916e-06	1	1	1
ENSG00000169758	TMEM266	0.417043	3.03843e-07	1	1	1
ENSG00000126733	DACH2	0.417399	3.97425e-07	1	1	1
ENSG00000267890	AC010624.2	0.417798	4.05041e-07	1	1	1
ENSG00000186907	RTN4RL2	0.41824	9.44494e-07	1	1	1
ENSG00000171303	KCNK3	0.418673	6.51975e-07	1	1	1
ENSG00000162706	CADM3	0.418961	1.09667e-06	1	1	1
ENSG00000165983	PTER	0.418996	5.46544e-07	1	1	1
ENSG00000168135	KCNJ4	0.41907	9.44494e-07	1	1	1
ENSG00000103154	NECAB2	0.419076	1.22855e-06	1	1	1
ENSG00000272327	ENSG00000272327	0.419443	1.90899e-06	1	1	1
ENSG00000163032	VSNL1	0.419526	1.31276e-06	1	1	1
ENSG00000188674	C2orf80	0.42026	8.37673e-07	1	1	1
ENSG00000175772	LINC01106	0.420362	9.21117e-07	1	1	1
ENSG00000126583	PRKCG	0.421077	1.50427e-06	1	1	1
ENSG00000223812	AC073365.1	0.421084	1.0406e-06	1	1	1
ENSG00000004848	ARX	0.42113	5.46844e-07	1	1	1
ENSG00000117069	ST6GALNAC5	0.421859	4.15827e-07	1	1	1
ENSG00000259823	LYPD8	0.422556	1.10838e-06	1	1	1
ENSG00000143674	MAP3K21	0.422793	8.95978e-07	1	1	1
ENSG00000225670	CADM3-AS1	0.423082	1.85864e-06	1	1	1
ENSG00000162951	LRRTM1	0.424071	1.58885e-06	1	1	1
ENSG00000279090	AP000843.1	0.424112	1.64254e-06	1	1	1
ENSG00000133019	CHRM3	0.424758	1.08592e-06	1	1	1
ENSG00000260838	AC022893.2	0.425538	4.7535e-06	1	1	1
ENSG00000077152	UBE2T	0.425655	2.42535e-06	1	1	1
ENSG00000166006	KCNC2	0.425792	7.52535e-07	1	1	1
ENSG00000233532	LINC00460	0.425958	1.90944e-06	1	1	1
ENSG00000185290	NUPR2	0.425992	5.9513e-06	1	1	1
ENSG00000110786	PTPN5	0.427456	1.33549e-05	1	1	1
ENSG00000060709	RIMBP2	0.428214	1.29965e-05	1	1	1
ENSG00000144834	TAGLN3	0.428309	5.14226e-06	1	1	1
ENSG00000186377	CYP4X1	0.429148	1.03982e-06	1	1	1
ENSG00000135426	TESPA1	0.42954	8.72047e-07	1	1	1
ENSG00000155511	GRIA1	0.429615	2.0215e-06	1	1	1
ENSG00000106537	TSPAN13	0.429896	1.72984e-06	1	1	1
ENSG00000140284	SLC27A2	0.431203	2.18993e-06	1	1	1
ENSG00000169900	PYDC1	0.431311	4.52908e-06	1	1	1
ENSG00000204950	LRRC10B	0.431693	1.90899e-06	1	1	1
ENSG00000128656	CHN1	0.431714	7.51258e-07	1	1	1
ENSG00000070808	CAMK2A	0.43317	1.21479e-06	1	1	1
ENSG00000010438	PRSS3	0.434106	2.74093e-06	1	1	1
ENSG00000127585	FBXL16	0.434417	1.62277e-06	1	1	1
ENSG00000091137	SLC26A4	0.434526	2.42535e-06	1	1	1
ENSG00000172995	ARPP21	0.434692	1.44424e-06	1	1	1
ENSG00000119866	BCL11A	0.435353	1.90899e-06	1	1	1
ENSG00000119125	GDA	0.435556	1.09325e-06	1	1	1
ENSG00000236268	LINC01361	0.435565	8.75076e-07	1	1	1
ENSG00000172020	GAP43	0.435836	2.3074e-06	1	1	1
ENSG00000272398	CD24	0.436112	1.58885e-06	1	1	1
ENSG00000179673	RPRML	0.436853	5.4727e-06	1	1	1
ENSG00000145632	PLK2	0.4379	3.92825e-06	1	1	1
ENSG00000091664	SLC17A6	0.438064	1.58885e-06	1	1	1
ENSG00000156298	TSPAN7	0.438293	3.87929e-06	1	1	1
ENSG00000117152	RGS4	0.439126	1.85864e-06	1	1	1
ENSG00000228971	AL356479.1	0.439404	1.54263e-06	1	1	1
ENSG00000260500	AC010336.2	0.439478	1.47625e-06	1	1	1
ENSG00000118432	CNR1	0.439856	1.70677e-06	1	1	1
ENSG00000176788	BASP1	0.43992	2.61514e-06	1	1	1
ENSG00000233705	SLC26A4-AS1	0.439973	1.66131e-06	1	1	1
ENSG00000167754	KLK5	0.441158	1.03951e-05	1	1	1
ENSG00000112186	CAP2	0.441501	3.52182e-06	1	1	1
ENSG00000156502	SUPV3L1	0.441753	2.27803e-06	1	1	1
ENSG00000171509	RXFP1	0.442085	1.79154e-06	1	1	1
ENSG00000070729	CNGB1	0.442506	1.08011e-05	1	1	1
ENSG00000248441	LINC01197	0.442507	3.36773e-06	1	1	1
ENSG00000172209	GPR22	0.442581	3.9517e-06	1	1	1
ENSG00000216863	LY86-AS1	0.442913	1.85864e-06	1	1	1
ENSG00000060140	STYK1	0.44346	2.62912e-06	1	1	1
ENSG00000147642	SYBU	0.443816	3.29793e-06	1	1	1
ENSG00000185760	KCNQ5	0.444044	2.30045e-06	1	1	1
ENSG00000173930	SLCO4C1	0.444494	1.90941e-06	1	1	1
ENSG00000133985	TTC9	0.444679	5.12208e-06	1	1	1
ENSG00000077080	ACTL6B	0.445056	5.12208e-06	1	1	1
ENSG00000205035	AC136759.1	0.445513	2.87053e-06	1	1	1
ENSG00000272479	AC010857.1	0.445548	3.52182e-06	1	1	1
ENSG00000024862	CCDC28A	0.445673	2.31831e-06	1	1	1
ENSG00000253368	TRNP1	0.445898	3.94936e-05	1	1	1
ENSG00000230006	ANKRD36BP2	0.445915	1.43175e-05	1	1	1
ENSG00000143340	FAM163A	0.446034	1.03951e-05	1	1	1
ENSG00000184672	RALYL	0.446108	2.61514e-06	1	1	1
ENSG00000260025	AC009414.2	0.44649	1.94493e-06	1	1	1
ENSG00000169744	LDB2	0.446834	2.37925e-06	1	1	1
ENSG00000102468	HTR2A	0.447027	5.15649e-06	1	1	1
ENSG00000105202	FBL	0.447114	5.86483e-06	1	1	1
ENSG00000228620	Z97056.1	0.447576	6.09838e-06	1	0	1
ENSG00000133169	BEX1	0.448478	9.72266e-06	1	1	1
ENSG00000196557	CACNA1H	0.448553	5.23737e-06	1	1	1
ENSG00000198108	CHSY3	0.44857	6.59241e-06	1	1	1
ENSG00000184185	KCNJ12	0.448653	1.00916e-06	1	1	1
ENSG00000109158	GABRA4	0.449019	7.24034e-06	1	1	1
ENSG00000273419	AC004877.1	0.449453	2.40352e-06	1	1	1
ENSG00000130032	PRRG3	0.449612	3.52227e-06	1	1	1
ENSG00000136928	GABBR2	0.449806	5.14218e-06	1	1	1
ENSG00000054803	CBLN4	0.449982	4.25649e-06	1	1	1
ENSG00000214842	RAD51AP2	0.45021	4.60664e-06	1	0	1
ENSG00000157214	STEAP2	0.450374	1.71862e-06	1	1	1
ENSG00000267448	AC010649.1	0.450484	3.13963e-06	1	1	1
ENSG00000168748	CA7	0.450914	2.95368e-06	1	1	1
ENSG00000156140	ADAMTS3	0.450921	3.52182e-06	1	1	1
ENSG00000164604	GPR85	0.451433	2.40352e-06	1	1	1
ENSG00000148798	INA	0.451442	6.22578e-06	1	1	1
ENSG00000165995	CACNB2	0.451445	3.8153e-06	1	1	1
ENSG00000123977	DAW1	0.451819	7.63905e-06	1	1	1
ENSG00000240204	SMKR1	0.45225	1.38294e-05	1	1	1
ENSG00000132535	DLG4	0.452359	7.61303e-06	1	1	1
ENSG00000154096	THY1	0.452618	7.7869e-06	1	1	1
ENSG00000124203	ZNF831	0.452698	9.38229e-06	1	1	1
ENSG00000260412	AL353746.1	0.452911	5.12208e-06	1	1	1
ENSG00000265579	AC023301.1	0.453149	3.07584e-06	1	1	1
ENSG00000182674	KCNB2	0.4533	4.66216e-06	1	1	1
ENSG00000263878	DLGAP1-AS4	0.453549	6.55155e-06	1	1	1
ENSG00000130643	CALY	0.453869	6.41001e-06	1	1	1
ENSG00000242428	C3orf67-AS1	0.453981	4.76029e-06	1	1	1
ENSG00000167550	RHEBL1	0.454211	1.36857e-05	1	1	1
ENSG00000086300	SNX10	0.454883	8.15355e-06	1	1	1
ENSG00000124249	KCNK15	0.455786	3.85269e-06	1	1	1
ENSG00000110148	CCKBR	0.455948	9.67162e-06	1	1	1
ENSG00000135333	EPHA7	0.455969	9.53795e-06	1	1	1
ENSG00000084072	PPIE	0.456487	1.01362e-05	1	1	1
ENSG00000121769	FABP3	0.456515	1.12786e-05	1	1	1
ENSG00000260001	TGFBR3L	0.456639	7.61303e-06	1	1	1
ENSG00000139988	RDH12	0.456858	7.82365e-06	1	1	1
ENSG00000273301	AC016717.2	0.45731	4.30079e-06	1	1	1
ENSG00000007264	MATK	0.457696	6.09838e-06	1	1	1
ENSG00000167535	CACNB3	0.457768	6.55155e-06	1	1	1
ENSG00000170396	ZNF804A	0.457826	1.10298e-05	1	1	1
ENSG00000233542	AL391845.2	0.458245	2.66162e-06	1	1	1
ENSG00000171126	KCNG3	0.458461	1.37153e-05	1	1	1
ENSG00000156642	NPTN	0.458537	9.38229e-06	1	1	1
ENSG00000213190	MLLT11	0.458749	1.08011e-05	1	1	1
ENSG00000166073	GPR176	0.458782	9.67162e-06	1	1	1
ENSG00000254377	MIR124-2HG	0.459034	5.86483e-06	1	1	1
ENSG00000224223	VSTM2A-OT1	0.459039	1.0371e-05	1	1	1
ENSG00000087460	GNAS	0.459611	1.03173e-05	1	0	1
ENSG00000272636	DOC2B	0.459934	6.09838e-06	1	1	1
ENSG00000152822	GRM1	0.460324	1.09415e-05	1	1	1
ENSG00000260196	AC124798.1	0.460336	3.61596e-06	1	1	1
ENSG00000226852	ENSG00000226852	0.460493	3.83649e-05	1	1	1
ENSG00000150054	MPP7	0.460586	1.18492e-05	1	1	1
ENSG00000135439	AGAP2	0.460608	5.46083e-06	1	1	1
ENSG00000127561	SYNGR3	0.460657	9.5742e-06	1	1	1
ENSG00000092051	JPH4	0.460671	9.17308e-06	1	1	1
ENSG00000260941	LINC00622	0.460809	2.09884e-05	1	1	1
ENSG00000147676	MAL2	0.46107	8.15355e-06	1	1	1
ENSG00000138944	SHISAL1	0.461346	3.58779e-06	1	1	1
ENSG00000179774	ATOH7	0.461357	8.13274e-06	1	1	1
ENSG00000164128	NPY1R	0.461607	1.04117e-05	1	1	1
ENSG00000196639	HRH1	0.46173	1.71954e-05	1	1	1
ENSG00000163618	CADPS	0.461915	1.81251e-05	1	1	1
ENSG00000115756	HPCAL1	0.461922	2.81898e-06	1	1	1
ENSG00000196368	NUDT11	0.462235	9.5742e-06	1	1	1
ENSG00000125170	DOK4	0.462464	5.68563e-06	1	1	1
ENSG00000059915	PSD	0.462548	1.24364e-05	1	1	1
ENSG00000167642	SPINT2	0.462885	2.00773e-05	1	1	1
ENSG00000047849	MAP4	0.462965	1.09415e-05	1	1	1
ENSG00000214944	ARHGEF28	0.462977	2.34559e-05	1	1	1
ENSG00000221823	PPP3R1	0.464191	4.05066e-05	1	1	1
ENSG00000158747	NBL1	0.464244	1.23282e-05	1	1	1
ENSG00000141655	TNFRSF11A	0.46432	6.55155e-06	1	1	1
ENSG00000174521	TTC9B	0.46445	7.7869e-06	1	1	1
ENSG00000135638	EMX1	0.464731	6.55155e-06	1	1	1
ENSG00000173267	SNCG	0.464824	1.97887e-05	1	1	1
ENSG00000165379	LRFN5	0.465013	8.91191e-06	1	1	1
ENSG00000171532	NEUROD2	0.465022	8.11423e-06	1	1	1
ENSG00000066248	NGEF	0.465122	1.20137e-05	1	1	1
ENSG00000134369	NAV1	0.465339	2.37314e-06	1	1	1
ENSG00000070501	POLB	0.465484	7.61303e-06	1	1	1
ENSG00000135519	KCNH3	0.465817	7.63905e-06	1	1	1
ENSG00000279496	ENSG00000279496	0.465963	1.23222e-05	1	1	1
ENSG00000253633	AP002852.1	0.46626	1.09415e-05	1	1	1
ENSG00000029153	ARNTL2	0.466339	1.81956e-05	1	1	1
ENSG00000167281	RBFOX3	0.466586	1.10298e-05	1	1	1
ENSG00000142549	IGLON5	0.467126	4.8401e-06	1	1	1
ENSG00000186469	GNG2	0.467289	5.8749e-06	1	1	1
ENSG00000272321	AP003355.2	0.467322	6.09838e-06	1	1	1
ENSG00000276462	BX255923.2	0.467413	1.3383e-05	1	1	1
ENSG00000154277	UCHL1	0.467758	2.16802e-05	1	1	1
ENSG00000183578	TNFAIP8L3	0.46776	2.04989e-05	1	1	1
ENSG00000011638	TMEM159	0.467819	0.000102758	1	1	1
ENSG00000196872	KIAA1211L	0.468311	1.03572e-05	1	1	1
ENSG00000067715	SYT1	0.468438	1.56374e-05	1	1	1
ENSG00000174951	FUT1	0.46859	1.04054e-05	1	1	1
ENSG00000180777	ANKRD30B	0.468668	3.4517e-05	1	1	1
ENSG00000273238	AC116565.1	0.46877	1.33549e-05	1	1	1
ENSG00000136267	DGKB	0.468933	3.76552e-05	1	1	1
ENSG00000168539	CHRM1	0.468942	1.7179e-05	1	1	1
ENSG00000174871	CNIH2	0.468997	1.4772e-05	1	1	1
ENSG00000155966	AFF2	0.469019	1.70231e-05	1	1	1
ENSG00000174145	NWD2	0.469221	1.9234e-05	1	1	1
ENSG00000117600	PLPPR4	0.469242	1.52054e-05	1	1	1
ENSG00000179841	AKAP5	0.469409	1.59058e-05	1	1	1
ENSG00000279322	AL035252.4	0.469501	3.30919e-06	1	1	1
ENSG00000257434	AC073525.1	0.469671	9.71993e-06	1	1	1
ENSG00000161647	MPP3	0.469707	7.63905e-06	1	1	1
ENSG00000105696	TMEM59L	0.470067	1.97712e-05	1	1	1
ENSG00000011677	GABRA3	0.470268	1.74985e-05	1	1	1
ENSG00000170214	ADRA1B	0.470278	1.23282e-05	1	1	1
ENSG00000163630	SYNPR	0.470433	1.23222e-05	1	1	1
ENSG00000077044	DGKD	0.470753	2.09287e-05	1	1	1
ENSG00000189181	OR14I1	0.470923	4.8483e-05	1	1	1
ENSG00000011083	SLC6A7	0.471118	1.37153e-05	1	1	1
ENSG00000104435	STMN2	0.471147	1.46037e-05	1	1	1
ENSG00000145920	CPLX2	0.471761	1.42905e-05	1	1	1
ENSG00000077264	PAK3	0.471812	1.65633e-05	1	1	1
ENSG00000166448	TMEM130	0.472077	1.85584e-05	1	1	1
ENSG00000107954	NEURL1	0.47221	1.65783e-05	1	1	1
ENSG00000179520	SLC17A8	0.472305	1.74393e-05	1	1	1
ENSG00000177679	SRRM3	0.472555	7.86103e-06	1	1	1
ENSG00000272551	AC017048.3	0.472784	1.44824e-05	1	1	1
ENSG00000203618	GP1BB	0.472896	8.91191e-06	1	1	1
ENSG00000152503	TRIM36	0.472937	1.81952e-05	1	1	1
ENSG00000165704	HPRT1	0.473013	2.00773e-05	1	1	1
ENSG00000182901	RGS7	0.473175	1.43175e-05	1	1	1
ENSG00000178860	MSC	0.473225	2.3001e-05	1	1	1
ENSG00000136158	SPRY2	0.473329	9.67162e-06	1	1	1
ENSG00000180332	KCTD4	0.473445	2.56817e-05	1	1	1
ENSG00000272157	AC107373.2	0.473883	1.31349e-05	1	1	1
ENSG00000170419	VSTM2A	0.474033	1.85517e-05	1	1	1
ENSG00000134072	CAMK1	0.474144	2.33991e-05	1	1	1
ENSG00000107518	ATRNL1	0.474161	0.000103734	1	1	1
ENSG00000186960	LINC01551	0.474513	1.3383e-05	1	1	1
ENSG00000106367	AP1S1	0.474563	7.15901e-06	1	1	1
ENSG00000145864	GABRB2	0.474711	2.9017e-05	1	1	1
ENSG00000187730	GABRD	0.475036	1.41934e-05	1	1	1
ENSG00000170091	NSG2	0.475072	1.99234e-05	1	1	1
ENSG00000086506	HBQ1	0.47525	1.4772e-05	1	1	1
ENSG00000104044	OCA2	0.475464	2.14991e-05	1	1	1
ENSG00000259834	AL365361.1	0.475875	1.88762e-05	1	1	1
ENSG00000182566	CLEC4G	0.476052	1.26899e-05	1	1	1
ENSG00000225953	SATB2-AS1	0.476233	1.75974e-05	1	1	1
ENSG00000070159	PTPN3	0.476432	1.792e-05	1	1	1
ENSG00000095752	IL11	0.476496	9.38229e-06	1	1	1
ENSG00000101188	NTSR1	0.476673	1.88649e-05	1	1	1
ENSG00000183576	SETD3	0.476731	2.00773e-05	1	1	1
ENSG00000102003	SYP	0.476816	3.89335e-05	1	1	1
ENSG00000104679	R3HCC1	0.477369	2.96533e-05	1	1	1
ENSG00000136238	RAC1	0.477524	3.50376e-05	1	1	1
ENSG00000136153	LMO7	0.477567	1.08011e-05	1	1	1
ENSG00000174482	LINGO2	0.478104	6.98299e-06	1	1	1
ENSG00000260391	AC022336.2	0.478147	8.70335e-05	1	1	1
ENSG00000003756	RBM5	0.478175	6.55155e-06	1	1	1
ENSG00000149972	CNTN5	0.478383	2.39966e-05	1	1	1
ENSG00000117598	PLPPR5	0.478385	2.18169e-05	1	1	1
ENSG00000157152	SYN2	0.478833	2.79783e-05	1	1	1
ENSG00000278978	AC092611.3	0.478867	5.17179e-06	1	1	1
ENSG00000237187	NR2F1-AS1	0.479083	2.98638e-05	1	1	1
ENSG00000114423	CBLB	0.479114	2.70642e-05	1	1	1
ENSG00000196730	DAPK1	0.479146	2.34559e-05	1	1	1
ENSG00000186010	NDUFA13	0.479186	4.8483e-05	1	1	1
ENSG00000263873	AP003396.5	0.479242	3.65492e-05	1	1	1
ENSG00000258757	AL133453.1	0.479367	3.4517e-05	1	1	1
ENSG00000101210	EEF1A2	0.479862	1.74985e-05	1	1	1
ENSG00000105143	SLC1A6	0.480397	2.27165e-05	1	1	1
ENSG00000166596	CFAP52	0.48056	3.48832e-05	1	1	1
ENSG00000134709	HOOK1	0.480694	3.55353e-05	1	1	1
ENSG00000198598	MMP17	0.480938	1.37153e-05	1	1	1
ENSG00000166526	ZNF3	0.480964	4.8277e-05	1	1	1
ENSG00000091592	NLRP1	0.481016	3.42717e-05	1	1	1
ENSG00000237289	CKMT1B	0.481285	1.84669e-05	1	1	1
ENSG00000187109	NAP1L1	0.481316	3.40697e-05	1	1	1
ENSG00000250366	TUNAR	0.481449	2.53871e-05	1	1	1
ENSG00000112053	SLC26A8	0.481506	1.94956e-05	1	1	1
ENSG00000106976	DNM1	0.481672	2.20489e-05	1	1	1
ENSG00000160408	ST6GALNAC6	0.481728	1.10298e-05	1	1	1
ENSG00000144331	ZNF385B	0.481837	3.76552e-05	1	1	1
ENSG00000159335	PTMS	0.481875	1.3739e-05	1	1	1
ENSG00000132849	PATJ	0.481899	1.65633e-05	1	1	1
ENSG00000049759	NEDD4L	0.482094	3.46988e-05	1	1	1
ENSG00000270111	AL583859.2	0.482182	5.26192e-05	1	1	1
ENSG00000138100	TRIM54	0.48263	2.2461e-05	1	1	1
ENSG00000165186	PTCHD1	0.482664	9.38229e-06	1	1	1
ENSG00000129911	KLF16	0.482714	1.4355e-05	1	1	1
ENSG00000022355	GABRA1	0.482728	3.83649e-05	1	1	1
ENSG00000124140	SLC12A5	0.482965	5.47487e-05	1	1	1
ENSG00000237522	NONOP2	0.483099	1.99234e-05	1	1	1
ENSG00000235026	DPP10-AS1	0.483121	3.75444e-05	1	1	1
ENSG00000184900	SUMO3	0.483352	7.7869e-06	1	1	1
ENSG00000272515	AL355578.1	0.483417	3.47567e-05	1	1	1
ENSG00000146374	RSPO3	0.484005	4.89843e-05	1	0	1
ENSG00000185070	FLRT2	0.48402	0.000273627	1	1	1
ENSG00000162374	ELAVL4	0.484212	1.8883e-05	1	1	1
ENSG00000117650	NEK2	0.484235	7.42632e-05	1	1	1
ENSG00000149742	SLC22A9	0.484305	2.70059e-05	1	1	1
ENSG00000188573	FBLL1	0.484346	7.05225e-05	1	1	1
ENSG00000054277	OPN3	0.484374	0.000134896	1	1	1
ENSG00000133665	DYDC2	0.484437	3.47567e-05	1	1	1
ENSG00000128245	YWHAH	0.48474	4.89659e-05	1	1	1
ENSG00000259168	AC104002.3	0.485424	4.15935e-05	1	1	1
ENSG00000107829	FBXW4	0.485507	4.8483e-05	1	1	1
ENSG00000156299	TIAM1	0.485555	1.78014e-05	1	1	1
ENSG00000114948	ADAM23	0.485579	5.0012e-05	1	1	1
ENSG00000182230	FAM153B	0.485639	2.56817e-05	1	1	1
ENSG00000124493	GRM4	0.485665	8.15355e-06	1	1	1
ENSG00000186462	NAP1L2	0.485751	2.70642e-05	1	1	1
ENSG00000136546	SCN7A	0.48589	1.42905e-05	1	1	1
ENSG00000178965	ERICH3	0.48596	3.5221e-05	1	1	1
ENSG00000176204	LRRTM4	0.486373	6.33913e-05	1	1	1
ENSG00000188582	PAQR9	0.486651	5.27146e-05	1	1	1
ENSG00000196376	SLC35F1	0.486652	3.7505e-05	1	1	1
ENSG00000184702	SEPT5	0.486728	3.79965e-05	1	1	1
ENSG00000215218	UBE2QL1	0.486737	2.73656e-05	1	1	1
ENSG00000164828	SUN1	0.486976	1.81952e-05	1	1	1
ENSG00000165434	PGM2L1	0.486985	0.000279341	1	1	1
ENSG00000279042	AP005242.4	0.486996	4.2293e-05	1	0	1
ENSG00000151229	SLC2A13	0.487054	9.0482e-05	1	1	1
ENSG00000205531	NAP1L4	0.487289	3.80186e-05	1	1	1
ENSG00000163827	LRRC2	0.487419	7.60304e-05	1	1	1
ENSG00000245910	SNHG6	0.487957	2.4576e-05	1	1	1
ENSG00000172301	COPRS	0.488049	7.87975e-06	1	1	1
ENSG00000181004	BBS12	0.488208	2.73656e-05	1	1	1
ENSG00000117245	KIF17	0.488473	1.7179e-05	1	1	1
ENSG00000157219	HTR5A	0.488743	1.53629e-05	1	1	1
ENSG00000116299	KIAA1324	0.488743	5.15887e-05	1	1	1
ENSG00000102387	TAF7L	0.488831	4.27906e-05	1	1	1
ENSG00000168490	PHYHIP	0.488865	4.8483e-05	1	1	1
ENSG00000132323	ILKAP	0.48897	4.8483e-05	1	1	1
ENSG00000198010	DLGAP2	0.48897	1.77203e-05	1	1	1
ENSG00000118733	OLFM3	0.489026	5.23744e-05	1	1	1
ENSG00000261728	AL138690.1	0.48904	3.44443e-05	1	1	1
ENSG00000089199	CHGB	0.489106	5.88012e-05	1	1	1
ENSG00000179148	ALOXE3	0.489122	3.57963e-05	1	1	1
ENSG00000163624	CDS1	0.489184	4.27906e-05	1	1	1
ENSG00000011105	TSPAN9	0.489276	2.53982e-05	1	1	1
ENSG00000188186	LAMTOR4	0.48932	2.96142e-05	1	1	1
ENSG00000145592	RPL37	0.489351	2.79783e-05	1	1	1
ENSG00000185742	C11orf87	0.48948	6.12243e-05	1	1	1
ENSG00000183662	FAM19A1	0.489541	4.95558e-05	1	1	1
ENSG00000140280	LYSMD2	0.489596	4.95558e-05	1	1	1
ENSG00000100604	CHGA	0.489647	4.19923e-05	1	1	1
ENSG00000249992	TMEM158	0.489837	3.00698e-05	1	1	1
ENSG00000180720	CHRM4	0.489877	4.1657e-05	1	1	1
ENSG00000169020	ATP5ME	0.489921	4.69905e-05	1	1	1
ENSG00000129355	CDKN2D	0.490138	9.48397e-05	1	1	1
ENSG00000105258	POLR2I	0.490193	0.000114279	1	1	1
ENSG00000081189	MEF2C	0.490269	0.000522247	1	1	1
ENSG00000169035	KLK7	0.490285	3.99132e-05	1	1	1
ENSG00000084764	MAPRE3	0.490454	1.81251e-05	1	1	1
ENSG00000166736	HTR3A	0.490492	3.56359e-05	1	1	1
ENSG00000130558	OLFM1	0.490582	5.0012e-05	1	1	1
ENSG00000176749	CDK5R1	0.490672	4.04486e-05	1	1	1
ENSG00000107105	ELAVL2	0.490773	1.62525e-05	1	1	1
ENSG00000184368	MAP7D2	0.490791	6.12243e-05	1	1	1
ENSG00000182255	KCNA4	0.49096	3.34774e-05	1	1	1
ENSG00000103316	CRYM	0.491026	6.06997e-05	1	1	1
ENSG00000145428	RNF175	0.491134	6.33142e-05	1	1	1
ENSG00000164076	CAMKV	0.491143	4.27738e-05	1	1	1
ENSG00000136883	KIF12	0.491409	4.50598e-05	1	1	1
ENSG00000144583	MARCH4	0.491444	3.87113e-05	1	1	1
ENSG00000011347	SYT7	0.491528	3.79965e-05	1	1	1
ENSG00000169122	FAM110B	0.491603	2.90025e-05	1	1	1
ENSG00000157212	PAXIP1	0.491621	3.54167e-05	1	1	1
ENSG00000106689	LHX2	0.491822	3.76418e-05	1	1	1
ENSG00000268565	AC005339.1	0.491933	2.56817e-05	1	1	1
ENSG00000134744	ZCCHC11	0.492155	1.38744e-05	1	1	1
ENSG00000065609	SNAP91	0.49229	3.77459e-05	1	1	1
ENSG00000125817	CENPB	0.492303	2.07109e-05	1	1	1
ENSG00000224982	TMEM233	0.492391	4.8483e-05	1	0	1
ENSG00000228824	MIR4500HG	0.492469	6.07112e-05	1	1	1
ENSG00000169851	PCDH7	0.492527	6.81596e-05	1	1	1
ENSG00000182450	KCNK4	0.492652	4.8483e-05	1	1	1
ENSG00000189159	JPT1	0.492867	5.0012e-05	1	1	1
ENSG00000074803	SLC12A1	0.492913	6.77722e-05	1	1	1
ENSG00000181195	PENK	0.493102	1.53077e-05	1	1	1
ENSG00000235711	ANKRD34C	0.493538	5.15887e-05	1	1	1
ENSG00000129295	LRRC6	0.493604	9.38396e-05	1	1	1
ENSG00000168214	RBPJ	0.493832	7.14067e-05	1	1	1
ENSG00000166342	NETO1	0.494172	6.92461e-05	1	1	1
ENSG00000157005	SST	0.49418	8.99983e-05	1	1	1
ENSG00000259948	AC124068.1	0.494213	5.0012e-05	1	1	1
ENSG00000160963	COL26A1	0.494451	4.47783e-05	1	1	1
ENSG00000125966	MMP24	0.49451	3.13302e-05	1	1	1
ENSG00000105409	ATP1A3	0.494519	7.79215e-05	1	1	1
ENSG00000136819	C9orf78	0.494606	0.000225505	1	1	1
ENSG00000185352	HS6ST3	0.494739	6.26856e-05	1	1	1
ENSG00000169676	DRD5	0.49498	7.74832e-05	1	1	1
ENSG00000131788	PIAS3	0.495056	1.88762e-05	1	1	1
ENSG00000107295	SH3GL2	0.495505	4.59641e-05	1	1	1
ENSG00000186310	NAP1L3	0.495698	6.40446e-05	1	1	1
ENSG00000138741	TRPC3	0.495703	4.69905e-05	1	1	1
ENSG00000205659	LIN52	0.4958	3.56359e-05	1	1	1
ENSG00000164647	STEAP1	0.49582	3.28468e-05	1	1	1
ENSG00000213088	ACKR1	0.49585	1.70231e-05	1	1	1
ENSG00000082556	OPRK1	0.4961	5.92626e-05	1	1	1
ENSG00000278456	AC015712.7	0.496357	5.92718e-05	1	1	1
ENSG00000091129	NRCAM	0.496372	0.000154282	1	1	1
ENSG00000185924	RTN4RL1	0.496381	4.59641e-05	1	1	1
ENSG00000034510	TMSB10	0.496877	2.98344e-05	1	1	1
ENSG00000066032	CTNNA2	0.496931	7.41393e-05	1	1	1
ENSG00000120942	UBIAD1	0.497187	1.45041e-05	1	1	1
ENSG00000164588	HCN1	0.497281	7.86047e-05	1	1	1
ENSG00000198910	L1CAM	0.49733	6.37149e-05	1	1	1
ENSG00000019505	SYT13	0.497342	5.25322e-05	1	1	1
ENSG00000177542	SLC25A22	0.497422	8.8784e-05	1	1	1
ENSG00000102678	FGF9	0.49745	6.63686e-05	1	1	1
ENSG00000187672	ERC2	0.497454	7.43914e-05	1	1	1
ENSG00000178171	AMER3	0.497498	6.65688e-05	1	1	1
ENSG00000162817	C1orf115	0.49774	7.70015e-05	1	1	1
ENSG00000011478	QPCTL	0.497768	2.41216e-05	1	1	1
ENSG00000053372	MRTO4	0.497957	2.94184e-05	1	1	1
ENSG00000267466	AC021683.1	0.498095	5.86503e-05	1	0	1
ENSG00000145545	SRD5A1	0.498123	0.000159155	1	1	1
ENSG00000176769	TCERG1L	0.498351	7.12127e-05	1	1	1
ENSG00000147432	CHRNB3	0.498412	1.79234e-05	1	1	1
ENSG00000277586	NEFL	0.498534	0.000801529	1	1	1
ENSG00000174808	BTC	0.498629	3.34397e-05	1	1	1
ENSG00000267561	AC093155.3	0.498918	9.08308e-05	1	1	1
ENSG00000182010	RTKN2	0.498981	7.14663e-05	1	1	1
ENSG00000122824	NUDT10	0.499164	4.02352e-05	1	1	1
ENSG00000175264	CHST1	0.499197	4.95558e-05	1	1	1
ENSG00000157168	NRG1	0.499384	2.72864e-05	1	1	1
ENSG00000106089	STX1A	0.499424	8.93337e-05	1	1	1
ENSG00000146360	GPR6	0.499434	6.98088e-05	1	0	1
ENSG00000169258	GPRIN1	0.499677	6.96537e-05	1	1	1
ENSG00000008118	CAMK1G	0.499751	5.85131e-05	1	1	1
ENSG00000157368	IL34	0.499769	4.13013e-05	1	1	1
ENSG00000152128	TMEM163	0.499937	2.77523e-05	1	1	1
ENSG00000188191	PRKAR1B	0.499965	0.000108733	1	1	1
ENSG00000236064	AL034399.2	0.500035	9.08308e-05	1	1	1
ENSG00000177879	AP3S1	0.500125	0.000114276	1	1	1
ENSG00000203280	AL022323.1	0.500157	0.000111152	1	1	1
ENSG00000184613	NELL2	0.500333	0.000110373	1	1	1
ENSG00000047249	ATP6V1H	0.500446	0.000114274	1	1	1
ENSG00000165349	SLC7A3	0.500736	0.00012613	1	1	1
ENSG00000170275	CRTAP	0.50089	8.54986e-05	1	1	1
ENSG00000149054	ZNF215	0.501006	5.0012e-05	1	1	1
ENSG00000186732	MPPED1	0.501026	5.91513e-05	1	1	1
ENSG00000184845	DRD1	0.501119	6.33142e-05	1	1	1
ENSG00000113327	GABRG2	0.501187	6.86922e-05	1	1	1
ENSG00000121905	HPCA	0.501203	8.15895e-05	1	1	1
ENSG00000173598	NUDT4	0.501459	0.000159809	1	1	1
ENSG00000130368	MAS1	0.501518	9.4585e-05	1	1	1
ENSG00000260711	AL121839.2	0.50153	6.81596e-05	1	1	1
ENSG00000172031	EPHX4	0.50158	7.80727e-05	1	1	1
ENSG00000173114	LRRN3	0.501584	0.000150491	1	1	1
ENSG00000184156	KCNQ3	0.501735	6.40446e-05	1	1	1
ENSG00000081138	CDH7	0.50175	0.000109873	1	1	1
ENSG00000172602	RND1	0.501865	4.02352e-05	1	1	1
ENSG00000083896	YTHDC1	0.501956	4.29067e-05	1	1	1
ENSG00000179542	SLITRK4	0.501958	0.000102758	1	1	1
ENSG00000072201	LNX1	0.502062	0.000136238	1	1	1
ENSG00000135482	ZC3H10	0.502111	8.99983e-05	1	1	1
ENSG00000135925	WNT10A	0.50231	7.56928e-05	1	1	1
ENSG00000034239	EFCAB1	0.502322	3.58553e-05	1	1	1
ENSG00000250305	TRMT9B	0.502505	4.95558e-05	1	1	1
ENSG00000166206	GABRB3	0.502549	7.86047e-05	1	1	1
ENSG00000116251	RPL22	0.502574	8.18367e-05	1	1	1
ENSG00000166257	SCN3B	0.502639	0.000134992	1	1	1
ENSG00000144290	SLC4A10	0.502819	0.000107494	1	1	1
ENSG00000152932	RAB3C	0.50307	0.000131658	1	1	1
ENSG00000164129	NPY5R	0.503084	7.7237e-05	1	1	1
ENSG00000175906	ARL4D	0.503096	0.000210893	1	1	1
ENSG00000118160	SLC8A2	0.503337	9.34478e-05	1	1	1
ENSG00000172247	C1QTNF4	0.503412	8.18367e-05	1	1	1
ENSG00000129596	CDO1	0.503546	0.000101364	1	1	1
ENSG00000155158	TTC39B	0.503597	3.88796e-05	1	1	1
ENSG00000188011	RTP5	0.503604	1.88762e-05	1	1	1
ENSG00000041353	RAB27B	0.503675	0.000129001	1	1	1
ENSG00000184388	PABPC1L2B	0.504073	4.8483e-05	1	1	1
ENSG00000165282	PIGO	0.50411	2.09884e-05	1	1	1
ENSG00000135454	B4GALNT1	0.504171	7.80535e-05	1	1	1
ENSG00000146147	MLIP	0.504471	0.000108733	1	1	1
ENSG00000180044	C3orf80	0.504759	0.000142436	1	1	1
ENSG00000214694	ARHGEF33	0.504957	6.20577e-05	1	1	1
ENSG00000135423	GLS2	0.505265	0.000100327	1	1	1
ENSG00000149927	DOC2A	0.505283	0.000112513	1	1	1
ENSG00000166171	DPCD	0.505332	6.98088e-05	1	1	1
ENSG00000175874	CREG2	0.50534	7.19808e-05	1	1	1
ENSG00000168653	NDUFS5	0.5054	9.08256e-05	1	1	1
ENSG00000144868	TMEM108	0.505415	0.000152856	1	1	1
ENSG00000100628	ASB2	0.505448	7.80727e-05	1	1	1
ENSG00000175606	TMEM70	0.505563	0.00026533	1	1	1
ENSG00000125851	PCSK2	0.505603	0.000124947	1	1	1
ENSG00000123496	IL13RA2	0.505604	0.000123625	1	1	1
ENSG00000101489	CELF4	0.505662	5.69384e-05	1	1	1
ENSG00000235531	MSC-AS1	0.505694	8.83254e-05	1	1	1
ENSG00000169220	RGS14	0.506021	9.20195e-05	1	1	1
ENSG00000122574	WIPF3	0.506058	0.000205975	1	1	1
ENSG00000139211	AMIGO2	0.506155	4.8483e-05	1	1	1
ENSG00000170540	ARL6IP1	0.506222	0.000189811	1	1	1
ENSG00000050628	PTGER3	0.506383	0.00017018	1	0	1
ENSG00000143947	RPS27A	0.506398	0.000107494	1	1	1
ENSG00000008083	JARID2	0.506508	8.18127e-05	1	1	1
ENSG00000185737	NRG3	0.506542	0.000101364	1	1	1
ENSG00000235280	MCF2L-AS1	0.506569	6.20577e-05	1	1	1
ENSG00000047936	ROS1	0.506662	0.000179457	1	1	1
ENSG00000225206	MIR137HG	0.506745	5.15887e-05	1	0	1
ENSG00000121104	FAM117A	0.506772	3.84122e-05	1	1	1
ENSG00000170579	DLGAP1	0.506941	0.000112287	1	1	1
ENSG00000174473	GALNTL6	0.507148	8.99983e-05	1	1	1
ENSG00000180660	MAB21L1	0.507246	4.57873e-05	1	1	1
ENSG00000232220	AC008440.2	0.507297	0.000102758	1	1	1
ENSG00000113805	CNTN3	0.507349	0.000145837	1	1	1
ENSG00000111913	RIPOR2	0.507359	0.000102758	1	1	1
ENSG00000132872	SYT4	0.507402	0.000126311	1	1	1
ENSG00000101349	PAK5	0.507491	0.000100914	1	1	1
ENSG00000116329	OPRD1	0.507553	8.73358e-05	1	0	1
ENSG00000117691	NENF	0.507641	0.000182464	1	1	1
ENSG00000127603	MACF1	0.507683	0.000658226	1	1	1
ENSG00000070193	FGF10	0.507905	0.000222974	1	1	1
ENSG00000196465	MYL6B	0.50791	6.3206e-05	1	1	1
ENSG00000100276	RASL10A	0.50799	6.87775e-05	1	1	1
ENSG00000204387	C6orf48	0.508241	0.00016144	1	1	1
ENSG00000186642	PDE2A	0.508248	0.000111956	1	1	1
ENSG00000132563	REEP2	0.508324	5.296e-05	1	1	1
ENSG00000144959	NCEH1	0.508439	5.04798e-05	1	1	1
ENSG00000131626	PPFIA1	0.508463	0.000157434	1	1	1
ENSG00000180440	SERTM1	0.50854	0.000107494	1	1	1
ENSG00000177511	ST8SIA3	0.508584	9.52592e-05	1	1	1
ENSG00000235118	FAM237A	0.508624	8.18367e-05	1	0	1
ENSG00000105649	RAB3A	0.508642	0.00022949	1	1	1
ENSG00000109738	GLRB	0.508664	6.87775e-05	1	1	1
ENSG00000175471	MCTP1	0.508771	0.00021082	1	1	1
ENSG00000160293	VAV2	0.508807	3.56359e-05	1	1	1
ENSG00000144619	CNTN4	0.50881	0.000157434	1	1	1
ENSG00000248485	PCP4L1	0.508932	0.000133419	1	1	1
ENSG00000152556	PFKM	0.509066	0.000114696	1	1	1
ENSG00000130540	SULT4A1	0.509141	6.89062e-05	1	1	1
ENSG00000118194	TNNT2	0.509193	8.57219e-05	1	1	1
ENSG00000108684	ASIC2	0.509284	0.000107494	1	1	1
ENSG00000069424	KCNAB2	0.509352	7.14663e-05	1	1	1
ENSG00000205279	CTXN3	0.509453	6.98088e-05	1	1	1
ENSG00000185386	MAPK11	0.509491	4.65008e-05	1	1	1
ENSG00000259946	BX005019.1	0.50951	0.000114276	1	1	1
ENSG00000134940	ACRV1	0.509553	0.000113633	1	1	1
ENSG00000132749	TESMIN	0.509567	0.000125446	1	1	1
ENSG00000117114	ADGRL2	0.509691	9.6201e-05	1	1	1
ENSG00000172985	SH3RF3	0.509761	6.77691e-05	1	1	1
ENSG00000162975	KCNF1	0.509814	0.000154699	1	1	1
ENSG00000114956	DGUOK	0.509886	0.000392791	1	1	1
ENSG00000072832	CRMP1	0.509967	0.000188022	1	1	1
ENSG00000115419	GLS	0.510276	0.00011484	1	1	1
ENSG00000078328	RBFOX1	0.510304	6.31068e-05	1	1	1
ENSG00000197756	RPL37A	0.510476	0.000110373	1	1	1
ENSG00000100564	PIGH	0.510526	0.000114279	1	1	1
ENSG00000167178	ISLR2	0.510588	9.08308e-05	1	1	1
ENSG00000152954	NRSN1	0.510637	0.000120391	1	1	1
ENSG00000167196	FBXO22	0.510671	4.29998e-05	1	1	1
ENSG00000110675	ELMOD1	0.51076	9.81523e-05	1	1	1
ENSG00000083454	P2RX5	0.510802	0.000123625	1	1	1
ENSG00000183775	KCTD16	0.510846	0.000157434	1	1	1
ENSG00000133816	MICAL2	0.510951	0.00012271	1	1	1
ENSG00000196704	AMZ2	0.511075	9.28546e-05	1	1	1
ENSG00000131015	ULBP2	0.511076	9.99417e-05	1	0	1
ENSG00000078725	BRINP1	0.511099	0.000109992	1	1	1
ENSG00000267272	LINC01140	0.511213	6.84471e-05	1	1	1
ENSG00000140945	CDH13	0.511221	0.000106952	1	1	1
ENSG00000184999	SLC22A10	0.511257	0.000151599	1	1	1
ENSG00000272016	ENSG00000272016	0.511368	0.000106952	1	1	1
ENSG00000204392	LSM2	0.511431	0.000134072	1	1	1
ENSG00000206187	LINC02346	0.51145	0.00012271	1	1	1
ENSG00000104722	NEFM	0.511571	0.000126826	1	1	1
ENSG00000117009	KMO	0.511611	0.000175429	1	1	1
ENSG00000140015	KCNH5	0.511721	0.00018384	1	1	1
ENSG00000078018	MAP2	0.51186	0.000143955	1	1	1
ENSG00000269998	ENSG00000269998	0.511886	0.000114788	1	1	1
ENSG00000163673	DCLK3	0.511897	0.00011484	1	1	1
ENSG00000160145	KALRN	0.511908	0.000115034	1	1	1
ENSG00000169271	HSPB3	0.512063	0.000113634	1	1	1
ENSG00000165819	METTL3	0.512258	0.000113634	1	1	1
ENSG00000182575	NXPH3	0.512355	6.37149e-05	1	1	1
ENSG00000104723	TUSC3	0.512377	0.000188481	1	1	1
ENSG00000170004	CHD3	0.512533	0.000191564	1	1	1
ENSG00000048545	GUCA1A	0.512747	0.000157434	1	1	1
ENSG00000158050	DUSP2	0.512772	5.69384e-05	1	1	1
ENSG00000102466	FGF14	0.512855	0.000156931	1	1	1
ENSG00000160932	LY6E	0.512864	0.000106952	1	1	1
ENSG00000205562	AL049775.1	0.51309	5.92161e-05	1	1	1
ENSG00000123349	PFDN5	0.513122	0.000144119	1	1	1
ENSG00000120685	PROSER1	0.513168	6.20577e-05	1	1	1
ENSG00000138286	FAM149B1	0.513365	0.000133515	1	1	1
ENSG00000143379	SETDB1	0.513376	0.000207395	1	1	1
ENSG00000115598	IL1RL2	0.513396	0.000122036	1	1	1
ENSG00000137825	ITPKA	0.513414	0.000141315	1	1	1
ENSG00000171159	C9orf16	0.51352	4.91472e-05	1	1	1
ENSG00000134317	GRHL1	0.513774	0.000174169	1	1	1
ENSG00000167680	SEMA6B	0.514043	0.000121431	1	1	1
ENSG00000160161	CILP2	0.514149	9.4585e-05	1	1	1
ENSG00000167964	RAB26	0.514189	9.20881e-05	1	1	1
ENSG00000139998	RAB15	0.514219	0.000159155	1	1	1
ENSG00000115760	BIRC6	0.514234	3.87526e-05	1	1	1
ENSG00000203875	SNHG5	0.514256	0.000246442	1	1	1
ENSG00000196482	ESRRG	0.514352	4.8483e-05	1	1	1
ENSG00000255082	GRM5-AS1	0.51436	0.000255229	1	1	1
ENSG00000145349	CAMK2D	0.5144	0.000136602	1	1	1
ENSG00000253537	PCDHGA7	0.514405	8.65827e-05	1	1	1
ENSG00000005249	PRKAR2B	0.514407	8.8784e-05	1	1	1
ENSG00000257069	AP001453.3	0.514509	0.000102283	1	1	1
ENSG00000174775	HRAS	0.514516	7.80535e-05	1	1	1
ENSG00000171992	SYNPO	0.514712	0.000157434	1	1	1
ENSG00000152214	RIT2	0.514758	0.000139331	1	1	1
ENSG00000139182	CLSTN3	0.514784	0.000175674	1	1	1
ENSG00000172292	CERS6	0.514786	0.000191045	1	1	1
ENSG00000136531	SCN2A	0.51497	0.000288565	1	1	1
ENSG00000146386	ABRACL	0.515257	0.000154282	1	1	1
ENSG00000115641	FHL2	0.515279	0.000220432	1	1	1
ENSG00000103145	HCFC1R1	0.515299	0.000118386	1	1	1
ENSG00000168061	SAC3D1	0.515405	0.000373502	1	1	1
ENSG00000280435	AC006058.4	0.515442	9.01259e-05	1	1	1
ENSG00000234394	AL353608.3	0.515448	0.000116585	1	0	1
ENSG00000153823	PID1	0.515494	5.15887e-05	1	1	1
ENSG00000233123	LINC01007	0.515572	8.50792e-05	1	1	1
ENSG00000221946	FXYD7	0.515655	7.61178e-05	1	1	1
ENSG00000127366	TAS2R5	0.515716	0.000144008	1	1	1
ENSG00000176171	BNIP3	0.515763	0.000110697	1	1	1
ENSG00000206052	DOK6	0.515871	6.31068e-05	1	1	1
ENSG00000112290	WASF1	0.516083	0.000202233	1	1	1
ENSG00000104327	CALB1	0.516226	0.000207717	1	1	1
ENSG00000079308	TNS1	0.516372	0.000200678	1	1	1
ENSG00000085831	TTC39A	0.516413	0.000144824	1	1	1
ENSG00000198225	FKBP1C	0.516426	8.18367e-05	1	1	1
ENSG00000120899	PTK2B	0.516803	0.000168675	1	1	1
ENSG00000235961	PNMA6A	0.516862	0.000612802	1	1	1
ENSG00000128250	RFPL1	0.516951	9.20881e-05	1	1	1
ENSG00000077327	SPAG6	0.517106	6.65688e-05	1	1	1
ENSG00000168993	CPLX1	0.517121	0.000114274	1	1	1
ENSG00000180616	SSTR2	0.517222	0.000131202	1	1	1
ENSG00000090971	NAT14	0.517264	4.8483e-05	1	1	1
ENSG00000135549	PKIB	0.517364	0.000116226	1	1	1
ENSG00000168350	DEGS2	0.517638	0.000146529	1	1	1
ENSG00000079819	EPB41L2	0.517674	4.92724e-05	1	1	1
ENSG00000198763	MT-ND2	0.517707	0.000437377	1	0	1
ENSG00000014641	MDH1	0.517717	0.00061377	1	1	1
ENSG00000151789	ZNF385D	0.517822	9.81523e-05	1	1	1
ENSG00000052841	TTC17	0.518032	0.000132964	1	1	1
ENSG00000153233	PTPRR	0.518119	0.000206256	1	1	1
ENSG00000121440	PDZRN3	0.518242	0.000177006	1	1	1
ENSG00000242173	ARHGDIG	0.518274	9.11948e-05	1	1	1
ENSG00000166619	BLCAP	0.518424	6.9345e-05	1	1	1
ENSG00000107242	PIP5K1B	0.518429	0.00012271	1	1	1
ENSG00000175416	CLTB	0.518783	5.51661e-05	1	1	1
ENSG00000188785	ZNF548	0.51879	0.000143231	1	1	1
ENSG00000186300	ZNF555	0.518828	9.38396e-05	1	1	1
ENSG00000184347	SLIT3	0.518899	0.000167023	1	1	1
ENSG00000265179	AP000894.2	0.518928	0.000171749	1	1	1
ENSG00000125848	FLRT3	0.519109	0.000354769	1	1	1
ENSG00000125675	GRIA3	0.519169	0.000169662	1	1	1
ENSG00000149932	TMEM219	0.519172	0.000167023	1	1	1
ENSG00000124785	NRN1	0.519302	0.000456457	1	1	1
ENSG00000270689	BUD13P1	0.51959	0.000121005	1	1	1
ENSG00000105705	SUGP1	0.519687	0.000100914	1	1	1
ENSG00000235865	GSN-AS1	0.519938	5.0012e-05	1	1	1
ENSG00000183011	NAA38	0.519951	0.000167023	1	1	1
ENSG00000100285	NEFH	0.519994	0.000536318	1	1	1
ENSG00000145242	EPHA5	0.520109	0.000405039	1	1	1
ENSG00000258283	AC011603.3	0.520142	0.000173001	1	1	1
ENSG00000153563	CD8A	0.520238	0.000333737	1	1	1
ENSG00000145526	CDH18	0.520297	0.000180836	1	1	1
ENSG00000162687	KCNT2	0.520418	0.000437377	1	1	1
ENSG00000124194	GDAP1L1	0.520537	0.000231171	1	1	1
ENSG00000108523	RNF167	0.520572	6.27497e-05	1	1	1
ENSG00000137563	GGH	0.520624	0.000300692	1	1	1
ENSG00000266472	MRPS21	0.52063	0.000113633	1	1	1
ENSG00000102172	SMS	0.520852	0.000208692	1	1	1
ENSG00000091482	SMPX	0.520862	0.000156203	1	1	1
ENSG00000255087	AP001993.1	0.520879	0.000154129	1	1	1
ENSG00000136099	PCDH8	0.521006	0.000175307	1	1	1
ENSG00000159899	NPR2	0.521097	6.65688e-05	1	1	1
ENSG00000198673	FAM19A2	0.521159	0.000208733	1	1	1
ENSG00000072657	TRHDE	0.521172	0.000241216	1	1	1
ENSG00000122254	HS3ST2	0.521183	0.00012613	1	0	1
ENSG00000269210	AC019171.1	0.521212	0.000199525	1	1	1
ENSG00000158856	DMTN	0.521231	0.000397223	1	1	1
ENSG00000232040	ZBED9	0.521314	0.000199675	1	1	1
ENSG00000150361	KLHL1	0.521465	0.000161057	1	0	1
ENSG00000145934	TENM2	0.521484	0.000200589	1	1	1
ENSG00000196542	SPTSSB	0.521487	0.00023906	1	1	1
ENSG00000156411	ATP5MPL	0.521882	4.63246e-05	1	1	1
ENSG00000048740	CELF2	0.522035	0.000188574	1	1	1
ENSG00000250584	LINC01511	0.52209	0.000206495	1	1	1
ENSG00000101746	NOL4	0.522115	9.64814e-05	1	1	1
ENSG00000116793	PHTF1	0.522191	0.000114279	1	1	1
ENSG00000261193	AC134312.4	0.522253	0.000154699	1	1	1
ENSG00000159247	TUBBP5	0.522394	0.000208535	1	1	1
ENSG00000138378	STAT4	0.522516	0.000180836	1	1	1
ENSG00000130590	SAMD10	0.522662	8.39393e-05	1	1	1
ENSG00000196507	TCEAL3	0.522685	0.000221397	1	1	1
ENSG00000071889	FAM3A	0.522797	0.000693194	1	1	1
ENSG00000138606	SHF	0.522802	7.56976e-05	1	1	1
ENSG00000259327	AC023906.3	0.522919	0.000269645	1	1	1
ENSG00000175806	MSRA	0.523122	0.000115474	1	1	1
ENSG00000105254	TBCB	0.523179	0.00347692	1	1	1
ENSG00000173406	DAB1	0.52318	7.36949e-05	1	1	1
ENSG00000143590	EFNA3	0.523227	0.000220632	1	1	1
ENSG00000227372	TP73-AS1	0.52348	0.000272957	1	1	1
ENSG00000184281	TSSC4	0.523566	0.000526044	1	1	1
ENSG00000144407	PTH2R	0.523578	0.000174169	1	1	1
ENSG00000124507	PACSIN1	0.523732	0.000169662	1	1	1
ENSG00000119946	CNNM1	0.523754	0.000205166	1	1	1
ENSG00000126749	EMG1	0.523795	0.000435874	1	1	1
ENSG00000189241	TSPYL1	0.523854	0.000168538	1	1	1
ENSG00000253972	MAL2-AS1	0.523931	0.000191045	1	1	1
ENSG00000134986	NREP	0.52394	6.41976e-05	1	1	1
ENSG00000105642	KCNN1	0.524005	0.000241299	1	1	1
ENSG00000254585	MAGEL2	0.524012	0.000290898	1	1	1
ENSG00000007516	BAIAP3	0.524047	0.000275588	1	1	1
ENSG00000040608	RTN4R	0.524103	0.000235994	1	1	1
ENSG00000088832	FKBP1A	0.524336	7.65654e-05	1	1	1
ENSG00000137494	ANKRD42	0.524423	0.000175043	1	1	1
ENSG00000177098	SCN4B	0.524455	0.00023906	1	1	1
ENSG00000163932	PRKCD	0.524465	0.000279015	1	1	1
ENSG00000164951	PDP1	0.524472	0.000233966	1	1	1
ENSG00000143256	PFDN2	0.524549	0.000279505	1	1	1
ENSG00000172782	FADS6	0.524557	0.000239595	1	1	1
ENSG00000136856	SLC2A8	0.524558	0.000262831	1	1	1
ENSG00000136935	GOLGA1	0.524567	0.000165317	1	1	1
ENSG00000164100	NDST3	0.524712	0.000322752	1	1	1
ENSG00000106648	GALNTL5	0.524719	0.000209441	1	0	1
ENSG00000119042	SATB2	0.524769	0.00024385	1	1	1
ENSG00000227825	SLC9A7P1	0.524778	0.000244212	1	1	1
ENSG00000111344	RASAL1	0.524833	9.99417e-05	1	1	1
ENSG00000108018	SORCS1	0.524934	0.000222974	1	1	1
ENSG00000197969	VPS13A	0.525037	0.000497961	1	1	1
ENSG00000172794	RAB37	0.525222	8.73358e-05	1	1	1
ENSG00000178015	GPR150	0.525332	0.000331721	1	0	1
ENSG00000124134	KCNS1	0.525386	0.000180836	1	1	1
ENSG00000186487	MYT1L	0.525412	0.000361488	1	1	1
ENSG00000183479	TREX2	0.525472	0.000251559	1	1	1
ENSG00000186288	PABPC1L2A	0.525582	0.00024385	1	1	1
ENSG00000204789	ZNF204P	0.525647	0.000279505	1	1	1
ENSG00000154099	DNAAF1	0.525775	8.18367e-05	1	1	1
ENSG00000226490	AC138647.1	0.525884	0.000174169	1	1	1
ENSG00000054356	PTPRN	0.525985	0.000215618	1	1	1
ENSG00000162494	LRRC38	0.525986	0.000291251	1	1	1
ENSG00000278897	AC020951.1	0.526144	0.00022949	1	1	1
ENSG00000273604	EPOP	0.526147	0.00037287	1	1	1
ENSG00000276991	RF01877	0.526161	0.000175043	1	1	1
ENSG00000168090	COPS6	0.526182	0.000657284	1	1	1
ENSG00000107130	NCS1	0.526197	0.000279703	1	1	1
ENSG00000110427	KIAA1549L	0.526262	0.000245625	1	1	1
ENSG00000165061	ZMAT4	0.52635	0.00023955	1	1	1
ENSG00000130005	GAMT	0.526368	0.000419897	1	1	1
ENSG00000155974	GRIP1	0.526428	0.000246442	1	1	1
ENSG00000170786	SDR16C5	0.526443	0.000208692	1	1	1
ENSG00000161681	SHANK1	0.526486	0.000311541	1	1	1
ENSG00000224032	EPB41L4A-AS1	0.526683	0.00066998	1	1	1
ENSG00000131831	RAI2	0.526746	0.000207154	1	1	1
ENSG00000176454	LPCAT4	0.526767	0.000275588	1	1	1
ENSG00000225663	MCRIP1	0.526786	0.000238829	1	1	1
ENSG00000159753	CARMIL2	0.52697	0.000222974	1	1	1
ENSG00000157782	CABP1	0.527003	0.0106818	1	1	1
ENSG00000139874	SSTR1	0.527035	0.00039478	1	1	1
ENSG00000197937	ZNF347	0.527038	0.000107494	1	1	1
ENSG00000123360	PDE1B	0.527189	0.00039543	1	1	1
ENSG00000178394	HTR1A	0.527311	0.000340615	1	0	1
ENSG00000130177	CDC16	0.527321	0.000238565	1	1	1
ENSG00000005486	RHBDD2	0.527355	8.76233e-05	1	1	1
ENSG00000185551	NR2F2	0.527504	0.00044505	1	1	1
ENSG00000204677	FAM153C	0.527544	0.000168421	1	1	1
ENSG00000183090	FREM3	0.527602	0.000133419	1	0	1
ENSG00000143502	SUSD4	0.527602	0.000331564	1	1	1
ENSG00000052126	PLEKHA5	0.527654	0.000220632	1	1	1
ENSG00000008256	CYTH3	0.527686	0.000210893	1	1	1
ENSG00000270069	MIR222HG	0.527695	0.000156203	1	1	1
ENSG00000111262	KCNA1	0.527702	0.000334232	1	1	1
ENSG00000143164	DCAF6	0.527734	0.000448447	1	1	1
ENSG00000119698	PPP4R4	0.527748	0.000441581	1	1	1
ENSG00000166105	GLB1L3	0.527829	0.000189811	1	1	1
ENSG00000197705	KLHL14	0.527915	0.000437377	1	0	1
ENSG00000143867	OSR1	0.52792	0.000208038	1	0	1
ENSG00000168348	INSM2	0.52804	0.000322981	1	1	1
ENSG00000185989	RASA3	0.528146	0.000457048	1	1	1
ENSG00000053438	NNAT	0.528282	0.000161364	1	1	1
ENSG00000247853	AC006064.2	0.528381	0.000159765	1	1	1
ENSG00000198585	NUDT16	0.528511	0.000246442	1	1	1
ENSG00000179915	NRXN1	0.528524	0.000328639	1	1	1
ENSG00000006210	CX3CL1	0.528582	0.000275588	1	1	1
ENSG00000105784	RUNDC3B	0.528609	0.000368985	1	1	1
ENSG00000139973	SYT16	0.528701	0.000354317	1	1	1
ENSG00000140743	CDR2	0.528734	0.000609531	1	1	1
ENSG00000116106	EPHA4	0.528738	0.000354769	1	1	1
ENSG00000049130	KITLG	0.528749	0.000415002	1	1	1
ENSG00000197457	STMN3	0.528787	0.000255208	1	1	1
ENSG00000103034	NDRG4	0.528853	0.000399149	1	1	1
ENSG00000165899	OTOGL	0.528906	0.000637782	1	1	1
ENSG00000128487	SPECC1	0.528944	0.00023906	1	1	1
ENSG00000102104	RS1	0.529034	0.000277009	1	1	1
ENSG00000233932	CTXN2	0.529083	0.000351465	1	1	1
ENSG00000253846	PCDHGA10	0.529312	0.000243127	1	1	1
ENSG00000184470	TXNRD2	0.529333	0.00024174	1	1	1
ENSG00000168830	HTR1E	0.529353	0.000136238	1	1	1
ENSG00000279138	AP002847.1	0.52938	0.000333737	1	1	1
ENSG00000260837	ENSG00000260837	0.529435	0.000333333	1	1	1
ENSG00000206432	TMEM200C	0.52947	0.000119833	1	1	1
ENSG00000118307	CASC1	0.529535	0.0111447	1	1	1
ENSG00000077279	DCX	0.529621	0.000376506	1	1	1
ENSG00000138675	FGF5	0.529754	0.000168675	1	1	1
ENSG00000035141	FAM136A	0.529755	0.000235068	1	1	1
ENSG00000139714	MORN3	0.529785	0.000376447	1	1	1
ENSG00000156976	EIF4A2	0.529808	0.000203127	1	1	1
ENSG00000160345	C9orf116	0.529841	9.34478e-05	1	1	1
ENSG00000154478	GPR26	0.529897	0.000234117	1	1	1
ENSG00000148308	GTF3C5	0.529922	0.000427009	1	1	1
ENSG00000174453	VWC2L	0.530143	0.000269555	1	1	1
ENSG00000153253	SCN3A	0.530245	0.000220052	1	1	1
ENSG00000198689	SLC9A6	0.530294	0.000595421	1	1	1
ENSG00000198435	NRARP	0.530366	7.69524e-05	1	1	1
ENSG00000164440	TXLNB	0.530433	0.000389437	1	1	1
ENSG00000120820	GLT8D2	0.53051	0.000247859	1	1	1
ENSG00000140939	NOL3	0.530548	0.00039543	1	1	1
ENSG00000143156	NME7	0.530591	0.000289715	1	1	1
ENSG00000168032	ENTPD3	0.530685	0.000287424	1	1	1
ENSG00000165752	STK32C	0.53072	0.000220958	1	1	1
ENSG00000267909	CCDC177	0.530862	0.000312006	1	1	1
ENSG00000166922	SCG5	0.531102	0.000464885	1	1	1
ENSG00000137766	UNC13C	0.531108	0.000334161	1	1	1
ENSG00000106263	EIF3B	0.531285	0.000819973	1	1	1
ENSG00000136938	ANP32B	0.5314	0.000248761	1	1	1
ENSG00000151952	TMEM132D	0.531401	0.000481485	1	1	1
ENSG00000079841	RIMS1	0.531409	0.00032098	1	1	1
ENSG00000177238	TRIM72	0.531563	9.59008e-05	1	1	1
ENSG00000096092	TMEM14A	0.531592	0.000553013	1	1	1
ENSG00000162105	SHANK2	0.531594	0.000219574	1	1	1
ENSG00000163166	IWS1	0.531669	0.000239595	1	1	1
ENSG00000154027	AK5	0.531806	0.000391578	1	1	1
ENSG00000204044	SLC12A5-AS1	0.531814	0.000230957	1	1	1
ENSG00000105880	DLX5	0.531914	0.000255208	1	1	1
ENSG00000104969	SGTA	0.532019	0.000631794	1	1	1
ENSG00000259234	ANKRD34C-AS1	0.532066	0.00066646	1	0	1
ENSG00000137824	RMDN3	0.532077	0.000167023	1	1	1
ENSG00000082014	SMARCD3	0.532111	0.000114279	1	1	1
ENSG00000186891	TNFRSF18	0.532123	0.000235994	1	1	1
ENSG00000112149	CD83	0.532162	0.000389073	1	1	1
ENSG00000136950	ARPC5L	0.532244	0.000273912	1	1	1
ENSG00000100167	SEPT3	0.532284	0.00057508	1	1	1
ENSG00000164610	RP9	0.532378	0.000463472	1	1	1
ENSG00000128573	FOXP2	0.532623	0.000749047	1	1	1
ENSG00000141580	WDR45B	0.532627	0.000263608	1	1	1
ENSG00000235426	AL133481.1	0.532631	0.000456502	1	1	1
ENSG00000132359	RAP1GAP2	0.53264	0.000310925	1	1	1
ENSG00000134121	CHL1	0.532649	0.000638842	1	1	1
ENSG00000135953	MFSD9	0.532718	9.74412e-05	1	1	1
ENSG00000171243	SOSTDC1	0.532793	0.000322752	1	1	1
ENSG00000184014	DENND5A	0.532821	0.000356209	1	1	1
ENSG00000100142	POLR2F	0.532845	0.000359481	1	1	1
ENSG00000072110	ACTN1	0.532867	0.000231261	1	1	1
ENSG00000147246	HTR2C	0.532947	0.000249481	1	1	1
ENSG00000101958	GLRA2	0.532952	0.000653479	1	0	1
ENSG00000138028	CGREF1	0.532954	0.000434179	1	1	1
ENSG00000139970	RTN1	0.532998	0.000340398	1	1	1
ENSG00000123901	GPR83	0.533081	0.000245642	1	1	1
ENSG00000162981	FAM84A	0.533088	0.000277009	1	1	1
ENSG00000163793	DNAJC5G	0.533193	0.000209441	1	0	1
ENSG00000178127	NDUFV2	0.533271	0.000631794	1	1	1
ENSG00000236922	LINC01378	0.533274	0.00029336	1	0	1
ENSG00000224116	INHBA-AS1	0.533277	0.000375338	1	1	1
ENSG00000272909	AL122035.2	0.533293	0.000365178	1	1	1
ENSG00000228594	FNDC10	0.533358	0.000220632	1	1	1
ENSG00000156463	SH3RF2	0.53346	0.000320425	1	1	1
ENSG00000091622	PITPNM3	0.533496	0.000351465	1	1	1
ENSG00000112981	NME5	0.533564	0.000440032	1	1	1
ENSG00000157106	SMG1	0.533653	9.23773e-05	1	1	1
ENSG00000132275	RRP8	0.533741	0.000372953	1	1	1
ENSG00000178821	TMEM52	0.533764	0.000262831	1	1	1
ENSG00000138814	PPP3CA	0.533902	0.000275588	1	1	1
ENSG00000181908	AP003774.1	0.533911	0.000255208	1	1	1
ENSG00000150556	LYPD6B	0.533967	0.000371581	1	1	1
ENSG00000137843	PAK6	0.534008	0.000217186	1	1	1
ENSG00000182768	NGRN	0.534052	0.000762745	1	1	1
ENSG00000213047	DENND1B	0.534072	0.000376978	1	1	1
ENSG00000136141	LRCH1	0.534085	0.000157434	1	1	1
ENSG00000112232	KHDRBS2	0.534142	0.000182464	1	1	1
ENSG00000152969	JAKMIP1	0.534153	0.000771338	1	1	1
ENSG00000135324	MRAP2	0.534153	0.000370811	1	1	1
ENSG00000144355	DLX1	0.53419	0.000207845	1	1	1
ENSG00000225110	PNMA6F	0.534203	0.000456457	1	1	1
ENSG00000081803	CADPS2	0.534231	0.000185534	1	1	1
ENSG00000177479	ARIH2	0.534318	0.00061377	1	1	1
ENSG00000157870	FAM213B	0.534338	0.000606154	1	1	1
ENSG00000123191	ATP7B	0.534399	0.000129389	1	1	1
ENSG00000272420	AL513477.2	0.534435	9.41114e-05	1	1	1
ENSG00000145491	ROPN1L	0.534465	0.000309988	1	1	1
ENSG00000157542	KCNJ6	0.534626	0.000343159	1	1	1
ENSG00000183785	TUBA8	0.53464	0.000428401	1	1	1
ENSG00000205037	AC134312.1	0.534668	0.000462557	1	1	1
ENSG00000264443	AL445686.2	0.534679	0.000195538	1	1	1
ENSG00000231233	CFAP58-AS1	0.534702	0.00060558	1	1	1
ENSG00000145147	SLIT2	0.534724	0.000413402	1	1	1
ENSG00000198216	CACNA1E	0.534768	0.000350188	1	1	1
ENSG00000248455	LINC02217	0.534774	0.000346666	1	1	1
ENSG00000215217	C5orf49	0.53479	0.000174169	1	1	1
ENSG00000221866	PLXNA4	0.534849	0.000370811	1	1	1
ENSG00000007520	TSR3	0.53498	0.000573711	1	1	1
ENSG00000234390	USP27X-AS1	0.535075	0.000399505	1	1	1
ENSG00000136052	SLC41A2	0.53536	0.000497223	1	1	1
ENSG00000100941	PNN	0.53538	0.000334885	1	1	1
ENSG00000132763	MMACHC	0.535404	0.000190893	1	1	1
ENSG00000164465	DCBLD1	0.535498	0.00113162	1	1	1
ENSG00000187122	SLIT1	0.535521	0.000413402	1	1	1
ENSG00000272379	AL008729.2	0.535549	0.000344309	1	1	1
ENSG00000111218	PRMT8	0.535572	0.000381668	1	1	1
ENSG00000161677	JOSD2	0.535627	0.00104109	1	1	1
ENSG00000171943	SRGAP2C	0.535642	0.00026368	1	1	1
ENSG00000177556	ATOX1	0.535675	0.000671796	1	1	1
ENSG00000171246	NPTX1	0.53573	0.000439356	1	1	1
ENSG00000197343	ZNF655	0.535735	0.000166615	1	1	1
ENSG00000187186	AL162231.1	0.535804	0.000156203	1	1	1
ENSG00000182621	PLCB1	0.53581	0.000607628	1	1	1
ENSG00000101977	MCF2	0.535811	0.000610679	1	1	1
ENSG00000166979	EVA1C	0.535965	0.000455493	1	1	1
ENSG00000269145	AC007192.2	0.536025	0.000173001	1	1	1
ENSG00000006432	MAP3K9	0.536045	0.000407206	1	1	1
ENSG00000114812	VIPR1	0.536091	0.000358072	1	1	1
ENSG00000174460	ZCCHC12	0.536095	0.000449445	1	1	1
ENSG00000101412	E2F1	0.536332	0.000129389	1	1	1
ENSG00000133135	RNF128	0.536368	0.000217186	1	1	1
ENSG00000165424	ZCCHC24	0.536441	0.000389728	1	1	1
ENSG00000148120	C9orf3	0.536613	0.000660372	1	1	1
ENSG00000178752	ERFE	0.536917	0.000346666	1	1	1
ENSG00000221890	NPTXR	0.536947	0.000463472	1	1	1
ENSG00000176840	MIR7-3HG	0.536948	0.000490866	1	1	1
ENSG00000188916	FAM196A	0.537003	0.000249444	1	1	1
ENSG00000124702	KLHDC3	0.537056	0.000245037	1	1	1
ENSG00000163536	SERPINI1	0.537292	0.000269645	1	1	1
ENSG00000260230	FRRS1L	0.537296	0.00154758	1	1	1
ENSG00000125775	SDCBP2	0.537347	0.000266068	1	1	1
ENSG00000185274	GALNT17	0.537622	0.000406656	1	1	1
ENSG00000186577	SMIM29	0.537741	0.000286159	1	1	1
ENSG00000269945	AC004817.4	0.537831	0.000385922	1	1	1
ENSG00000130511	SSBP4	0.537891	0.000244196	1	1	1
ENSG00000182512	GLRX5	0.537972	0.000698052	1	1	1
ENSG00000111305	GSG1	0.538067	0.000406656	1	1	1
ENSG00000137571	SLCO5A1	0.538181	0.000329118	1	0	1
ENSG00000102109	PCSK1N	0.538205	0.00026477	1	1	1
ENSG00000128563	PRKRIP1	0.538252	0.000532779	1	1	1
ENSG00000263809	AC135178.2	0.538261	0.000161364	1	1	1
ENSG00000058404	CAMK2B	0.53827	0.000406218	1	1	1
ENSG00000058091	CDK14	0.53827	0.000664408	1	1	1
ENSG00000187772	LIN28B	0.538478	0.000215009	1	1	1
ENSG00000108947	EFNB3	0.53854	0.000481485	1	1	1
ENSG00000116205	TCEANC2	0.538543	0.00038142	1	1	1
ENSG00000197381	ADARB1	0.538632	0.000235994	1	1	1
ENSG00000132386	SERPINF1	0.538658	0.000445444	1	0	1
ENSG00000204271	SPIN3	0.538668	0.000210913	1	1	1
ENSG00000125850	OVOL2	0.538677	0.000351465	1	1	1
ENSG00000175985	PLEKHD1	0.538781	0.000206042	1	1	1
ENSG00000120049	KCNIP2	0.538864	0.000406656	1	1	1
ENSG00000183978	COA3	0.538865	0.000607628	1	1	1
ENSG00000061918	GUCY1B1	0.538932	0.000610679	1	1	1
ENSG00000107262	BAG1	0.538938	0.000559434	1	1	1
ENSG00000169116	PARM1	0.538955	0.000618826	1	1	1
ENSG00000040731	CDH10	0.539188	0.000558252	1	1	1
ENSG00000158089	GALNT14	0.539282	0.00046837	1	1	1
ENSG00000260432	ENSG00000260432	0.539313	0.000551028	1	1	1
ENSG00000184831	APOO	0.539326	0.000625758	1	1	1
ENSG00000236859	NIFK-AS1	0.539356	0.000487042	1	1	1
ENSG00000119632	IFI27L2	0.539361	0.000180836	1	1	1
ENSG00000101460	MAP1LC3A	0.539377	0.0012585	1	1	1
ENSG00000147234	FRMPD3	0.539472	0.000198236	1	1	1
ENSG00000183248	PRR36	0.539567	0.000483268	1	1	1
ENSG00000204356	NELFE	0.53963	0.000558252	1	1	1
ENSG00000231632	ENSG00000231632	0.539684	0.000881623	1	0	1
ENSG00000156687	UNC5D	0.539735	0.000539107	1	1	1
ENSG00000196932	TMEM26	0.539744	0.000174169	1	1	1
ENSG00000267665	AC021683.3	0.539753	0.000262831	1	1	1
ENSG00000165194	PCDH19	0.539805	0.000570207	1	1	1
ENSG00000152092	ASTN1	0.539964	0.00027715	1	1	1
ENSG00000144645	OSBPL10	0.540014	0.000500053	1	1	1
ENSG00000180875	GREM2	0.54003	0.000409409	1	1	1
ENSG00000162873	KLHDC8A	0.540163	0.000215618	1	1	1
ENSG00000172465	TCEAL1	0.540244	0.000775502	1	1	1
ENSG00000134443	GRP	0.54031	0.000333333	1	1	1
ENSG00000181085	MAPK15	0.540325	0.00013129	1	1	1
ENSG00000153820	SPHKAP	0.54036	0.000180836	1	1	1
ENSG00000176101	SSNA1	0.540399	0.000538758	1	1	1
ENSG00000250510	GPR162	0.540399	0.000349613	1	1	1
ENSG00000152520	PAN3	0.54048	0.000348974	1	1	1
ENSG00000129159	KCNC1	0.540523	0.000437377	1	1	1
ENSG00000279013	AC110774.1	0.540531	0.00055133	1	1	1
ENSG00000172346	CSDC2	0.540564	0.000215618	1	1	1
ENSG00000147465	STAR	0.540571	0.00040005	1	1	1
ENSG00000183023	SLC8A1	0.54061	0.000699811	1	1	1
ENSG00000204442	FAM155A	0.540661	0.000605938	1	1	1
ENSG00000279663	AC104623.2	0.540693	0.000365178	1	1	1
ENSG00000169764	UGP2	0.540729	0.00212793	1	1	1
ENSG00000205208	C4orf46	0.540754	0.00039543	1	1	1
ENSG00000050165	DKK3	0.540786	0.00104996	1	1	1
ENSG00000120088	CRHR1	0.540876	0.000355	1	1	1
ENSG00000267673	FDX2	0.540909	0.000199459	1	1	1
ENSG00000072133	RPS6KA6	0.540921	0.000614615	1	1	1
ENSG00000179603	GRM8	0.541086	0.000599635	1	1	1
ENSG00000196549	MME	0.541346	0.000284578	1	1	1
ENSG00000227617	CERS6-AS1	0.541347	0.000515312	1	1	1
ENSG00000010626	LRRC23	0.541348	0.000582724	1	1	1
ENSG00000182809	CRIP2	0.541379	0.000272362	1	1	1
ENSG00000145063	AC062028.1	0.541463	0.000345907	1	1	1
ENSG00000174744	BRMS1	0.541489	0.000441581	1	1	1
ENSG00000131408	NR1H2	0.541496	0.000303006	1	1	1
ENSG00000162188	GNG3	0.541499	0.00057429	1	1	1
ENSG00000100387	RBX1	0.541574	0.000372644	1	1	1
ENSG00000245937	LINC01184	0.541616	0.000449168	1	1	1
ENSG00000215196	BASP1-AS1	0.541708	0.000463472	1	1	1
ENSG00000269987	AC004542.2	0.541754	0.000268614	1	1	1
ENSG00000119508	NR4A3	0.541782	0.000287424	1	1	1
ENSG00000065923	SLC9A7	0.541837	0.000568812	1	1	1
ENSG00000125931	CITED1	0.541842	0.000419475	1	1	1
ENSG00000169933	FRMPD4	0.542069	0.000639813	1	1	1
ENSG00000165802	NSMF	0.542093	0.000498116	1	1	1
ENSG00000170584	NUDCD2	0.542189	0.000652074	1	1	1
ENSG00000101098	RIMS4	0.542224	0.000449168	1	1	1
ENSG00000185933	CALHM1	0.542227	0.000511591	1	1	1
ENSG00000280234	AC124303.2	0.542238	0.000396124	1	1	1
ENSG00000177600	RPLP2	0.542255	0.00091144	1	1	1
ENSG00000106617	PRKAG2	0.542269	0.000614615	1	1	1
ENSG00000214376	VSTM5	0.542281	0.000500376	1	1	1
ENSG00000106479	ZNF862	0.542316	0.000367911	1	1	1
ENSG00000161682	FAM171A2	0.542478	0.000610679	1	1	1
ENSG00000169964	TMEM42	0.542482	0.0017691	1	1	1
ENSG00000266820	KPNA2P3	0.542493	0.000365178	1	1	1
ENSG00000114853	ZBTB47	0.542516	0.000747615	1	1	1
ENSG00000270181	BIVM-ERCC5	0.542523	0.000861386	1	1	1
ENSG00000154162	CDH12	0.542534	0.00060558	1	1	1
ENSG00000265784	AC006441.3	0.542604	0.000286159	1	1	1
ENSG00000213424	KRT222	0.542617	0.000455923	1	1	1
ENSG00000106341	PPP1R17	0.542622	0.000766597	1	1	1
ENSG00000141505	ASGR1	0.542637	0.000385832	1	1	1
ENSG00000086289	EPDR1	0.542643	0.00151065	1	1	1
ENSG00000152580	IGSF10	0.542681	0.000454563	1	1	1
ENSG00000144550	CPNE9	0.542821	0.000570207	1	1	1
ENSG00000272944	AC079834.2	0.542999	0.000449168	1	1	1
ENSG00000103363	ELOB	0.543027	0.000409409	1	1	1
ENSG00000196110	ZNF699	0.543037	0.000557642	1	1	1
ENSG00000163888	CAMK2N2	0.543057	0.000417563	1	1	1
ENSG00000064995	TAF11	0.5431	0.000354596	1	1	1
ENSG00000171951	SCG2	0.543148	0.00111018	1	1	1
ENSG00000133250	ZNF414	0.543213	0.000716655	1	1	1
ENSG00000220575	HTR5A-AS1	0.543263	0.000481153	1	1	1
ENSG00000229891	LINC01315	0.54336	0.000219574	1	1	1
ENSG00000125354	SEPT6	0.543462	0.000379085	1	1	1
ENSG00000149806	FAU	0.543518	0.000610679	1	1	1
ENSG00000247137	AP000873.2	0.54355	0.000171749	1	1	1
ENSG00000217236	SP9	0.543613	0.000577931	1	1	1
ENSG00000114446	IFT57	0.543762	0.000565361	1	1	1
ENSG00000108309	RUNDC3A	0.543799	0.000825534	1	1	1
ENSG00000196277	GRM7	0.54381	0.000377175	1	1	1
ENSG00000214796	AC098934.1	0.54383	0.00122422	1	1	1
ENSG00000139767	SRRM4	0.543854	0.000456457	1	1	1
ENSG00000143499	SMYD2	0.543859	0.0007519	1	1	1
ENSG00000184307	ZDHHC23	0.543916	0.0028539	1	1	1
ENSG00000108604	SMARCD2	0.543923	0.000713585	1	1	1
ENSG00000114279	FGF12	0.543933	0.00105897	1	1	1
ENSG00000162636	FAM102B	0.543986	0.00134975	1	1	1
ENSG00000166250	CLMP	0.544011	0.000239595	1	1	1
ENSG00000173452	TMEM196	0.544075	0.000645771	1	1	1
ENSG00000185008	ROBO2	0.544178	0.000338401	1	1	1
ENSG00000244040	IL12A-AS1	0.544185	0.000573711	1	1	1
ENSG00000065325	GLP2R	0.544189	0.000590066	1	0	1
ENSG00000164096	C4orf3	0.544271	0.00039478	1	1	1
ENSG00000240694	PNMA2	0.54429	0.000522944	1	1	1
ENSG00000198934	MAGEE1	0.544325	0.000334337	1	1	1
ENSG00000145506	NKD2	0.54438	0.000664408	1	1	1
ENSG00000110975	SYT10	0.544416	0.00272082	1	1	1
ENSG00000106683	LIMK1	0.5445	0.000801962	1	1	1
ENSG00000135002	RFK	0.54457	0.000887501	1	1	1
ENSG00000115353	TACR1	0.544607	0.000586154	1	1	1
ENSG00000180638	SLC47A2	0.544643	0.000388757	1	1	1
ENSG00000147408	CSGALNACT1	0.544658	0.000515312	1	1	1
ENSG00000070882	OSBPL3	0.544708	0.000456502	1	1	1
ENSG00000151882	CCL28	0.544945	0.000612315	1	1	1
ENSG00000174915	PTDSS2	0.544967	0.000792454	1	1	1
ENSG00000277692	AL121583.1	0.545091	0.0006652	1	1	1
ENSG00000198840	MT-ND3	0.545163	0.000806143	1	0	1
ENSG00000159592	GPBP1L1	0.545166	0.000614772	1	1	1
ENSG00000144713	RPL32	0.545191	0.000640173	1	1	1
ENSG00000152669	CCNO	0.545209	0.000532779	1	1	1
ENSG00000073969	NSF	0.545239	0.000729383	1	1	1
ENSG00000172943	PHF8	0.545358	0.00031148	1	1	1
ENSG00000167733	HSD11B1L	0.545371	0.000333333	1	1	1
ENSG00000162782	TDRD5	0.545379	0.000879777	1	0	1
ENSG00000226645	AP006216.1	0.545422	0.000943454	1	1	1
ENSG00000164935	DCSTAMP	0.54548	0.000343652	1	0	1
ENSG00000118276	B4GALT6	0.545482	0.000470622	1	1	1
ENSG00000167863	ATP5PD	0.545634	0.00274498	1	1	1
ENSG00000148218	ALAD	0.545646	0.000662524	1	1	1
ENSG00000267396	AC090236.1	0.545648	0.000570207	1	1	1
ENSG00000044524	EPHA3	0.545777	0.000775502	1	1	1
ENSG00000167257	RNF214	0.545808	0.000687154	1	1	1
ENSG00000055609	KMT2C	0.545824	0.000602127	1	1	1
ENSG00000170085	SIMC1	0.545876	0.000559398	1	1	1
ENSG00000198744	MTCO3P12	0.545886	0.000520381	1	1	1
ENSG00000134490	TMEM241	0.545895	0.00104811	1	1	1
ENSG00000111052	LIN7A	0.546002	0.000631794	1	1	1
ENSG00000179546	HTR1D	0.546057	0.000550247	1	1	1
ENSG00000189410	SH2D5	0.546059	0.000558252	1	1	1
ENSG00000250479	CHCHD10	0.54608	0.00039543	1	1	1
ENSG00000215039	CD27-AS1	0.546093	0.000232241	1	1	1
ENSG00000079462	PAFAH1B3	0.546112	0.000290966	1	1	1
ENSG00000125814	NAPB	0.5462	0.00068334	1	1	1
ENSG00000258504	AL157871.1	0.546212	0.00163857	1	1	1
ENSG00000244161	FLNB-AS1	0.546351	0.000817262	1	1	1
ENSG00000086504	MRPL28	0.546465	0.000650914	1	1	1
ENSG00000130119	GNL3L	0.546485	0.000373103	1	1	1
ENSG00000154065	ANKRD29	0.546594	0.000658226	1	1	1
ENSG00000169032	MAP2K1	0.546646	0.0028196	1	1	1
ENSG00000097007	ABL1	0.546828	0.00055133	1	1	1
ENSG00000184349	EFNA5	0.546893	0.000718003	1	1	1
ENSG00000162734	PEA15	0.546951	0.000161364	1	0	1
ENSG00000268069	AC004466.1	0.547041	0.00109522	1	1	1
ENSG00000197872	FAM49A	0.547066	0.000683049	1	1	1
ENSG00000196189	SEMA4A	0.547161	0.000978549	1	1	1
ENSG00000168843	FSTL5	0.547172	0.000257629	1	1	1
ENSG00000168959	GRM5	0.547172	0.000801962	1	1	1
ENSG00000109079	TNFAIP1	0.547176	0.000232932	1	1	1
ENSG00000254973	AC105219.4	0.547454	0.000687154	1	1	1
ENSG00000151914	DST	0.547498	0.00704811	1	1	1
ENSG00000176406	RIMS2	0.547515	0.000586202	1	1	1
ENSG00000198354	DCAF12L2	0.547534	0.000483268	1	1	1
ENSG00000268230	AC012313.3	0.547571	0.00105066	1	1	1
ENSG00000174197	MGA	0.547592	0.000310925	1	1	1
ENSG00000165914	TTC7B	0.547639	0.000669775	1	1	1
ENSG00000122733	PHF24	0.547678	0.000604673	1	1	1
ENSG00000108176	DNAJC12	0.547691	0.000262025	1	1	1
ENSG00000267163	ENSG00000267163	0.547747	0.000770478	1	1	1
ENSG00000198785	GRIN3A	0.547761	0.000411084	1	0	1
ENSG00000115268	RPS15	0.54781	0.000838315	1	1	1
ENSG00000174839	DENND6A	0.547834	0.000391056	1	1	1
ENSG00000256008	AC125616.1	0.547855	0.000582946	1	1	1
ENSG00000103024	NME3	0.547856	0.000825534	1	1	1
ENSG00000168546	GFRA2	0.547857	0.000680795	1	1	1
ENSG00000146221	TCTE1	0.547915	0.00046895	1	1	1
ENSG00000279553	ENSG00000279553	0.547985	0.000672783	1	1	1
ENSG00000102385	DRP2	0.548027	0.000759346	1	1	1
ENSG00000172671	ZFAND4	0.548068	0.000573711	1	1	1
ENSG00000181378	CFAP65	0.548182	0.000246442	1	1	1
ENSG00000154118	JPH3	0.548198	0.000589061	1	1	1
ENSG00000148291	SURF2	0.548205	0.000952348	1	1	1
ENSG00000240225	ZNF542P	0.548239	0.000242849	1	1	1
ENSG00000063180	CA11	0.548247	0.000771559	1	1	1
ENSG00000124191	TOX2	0.548274	0.000643445	1	1	1
ENSG00000149654	CDH22	0.548279	0.000573482	1	1	1
ENSG00000183444	OR7E38P	0.548348	0.000279505	1	1	1
ENSG00000106992	AK1	0.548411	0.000445444	1	1	1
ENSG00000229325	ACAP2-IT1	0.548469	0.000439356	1	0	1
ENSG00000247317	LY6E-DT	0.548476	0.000396124	1	1	1
ENSG00000181656	GPR88	0.548617	0.000770478	1	1	1
ENSG00000257923	CUX1	0.548737	0.000711939	1	1	1
ENSG00000111361	EIF2B1	0.548888	0.000826054	1	1	1
ENSG00000070961	ATP2B1	0.549088	0.00104944	1	1	1
ENSG00000151025	GPR158	0.549172	0.000856121	1	1	1
ENSG00000132017	DCAF15	0.549211	0.000720913	1	1	1
ENSG00000267506	AC021683.2	0.549216	0.000746335	1	0	1
ENSG00000277531	PNMA8C	0.549234	0.000562713	1	1	1
ENSG00000166407	LMO1	0.549241	0.000640173	1	0	1
ENSG00000160325	CACFD1	0.549316	0.000647996	1	1	1
ENSG00000101464	PIGU	0.549352	0.000995063	1	1	1
ENSG00000081985	IL12RB2	0.549482	0.00212894	1	0	1
ENSG00000262209	PCDHGB3	0.549529	0.00095371	1	1	1
ENSG00000148680	HTR7	0.549551	0.000592422	1	0	1
ENSG00000224043	CCNT2-AS1	0.549572	0.000241571	1	1	1
ENSG00000168795	ZBTB5	0.549657	0.000267145	1	1	1
ENSG00000172575	RASGRP1	0.54974	0.00126644	1	1	1
ENSG00000088833	NSFL1C	0.549767	0.00163857	1	1	1
ENSG00000156113	KCNMA1	0.549779	0.000675896	1	1	1
ENSG00000104361	NIPAL2	0.549784	0.000856649	1	1	1
ENSG00000255114	AP003392.3	0.549812	0.000324604	1	1	1
ENSG00000271892	AC026790.1	0.549857	0.000640173	1	1	1
ENSG00000129933	MAU2	0.549865	0.000754397	1	1	1
ENSG00000135502	SLC26A10	0.549888	0.000312878	1	1	1
ENSG00000189046	ALKBH2	0.549906	0.000645524	1	1	1
ENSG00000156486	KCNS2	0.549906	0.000862484	1	1	1
ENSG00000150403	TMCO3	0.550028	0.0007519	1	1	1
ENSG00000135776	ABCB10	0.550203	0.00040005	1	1	1
ENSG00000164855	TMEM184A	0.550269	0.000658226	1	1	1
ENSG00000162191	UBXN1	0.55045	0.00191329	1	1	1
ENSG00000213023	SYT3	0.55046	0.00166018	1	1	1
ENSG00000133302	SLF1	0.550499	0.000735148	1	1	1
ENSG00000258315	C17orf49	0.55052	0.000565361	1	1	1
ENSG00000262967	AC005921.2	0.550529	0.000650751	1	1	1
ENSG00000236015	AC011290.2	0.550536	0.000483268	1	1	0
ENSG00000118402	ELOVL4	0.550583	0.000726363	1	1	1
ENSG00000115392	FANCL	0.550632	0.000220632	1	1	1
ENSG00000263707	AC005277.1	0.550756	0.000650927	1	0	1
ENSG00000256193	LINC00507	0.550787	0.000657284	1	0	1
ENSG00000185305	ARL15	0.550851	0.00217071	1	1	1
ENSG00000068615	REEP1	0.550862	0.000841125	1	1	1
ENSG00000103942	HOMER2	0.55094	0.000688718	1	1	1
ENSG00000153132	CLGN	0.550975	0.000536318	1	1	1
ENSG00000147655	RSPO2	0.551025	0.000958463	1	1	1
ENSG00000185722	ANKFY1	0.551032	0.00023757	1	1	1
ENSG00000197724	PHF2	0.551057	0.000720913	1	1	1
ENSG00000175602	CCDC85B	0.551112	0.000334161	1	1	1
ENSG00000149929	HIRIP3	0.551142	0.000633789	1	1	1
ENSG00000122359	ANXA11	0.551143	0.000860301	1	1	1
ENSG00000146352	CLVS2	0.551185	0.00109216	1	1	1
ENSG00000075340	ADD2	0.551287	0.000838921	1	1	1
ENSG00000241158	ADAMTS9-AS1	0.551426	0.000887501	1	1	1
ENSG00000258643	BCL2L2-PABPN1	0.551434	0.000660506	1	1	1
ENSG00000126775	ATG14	0.551553	0.000538758	1	1	1
ENSG00000163046	ANKRD30BL	0.551637	0.000717073	1	1	1
ENSG00000272121	AC006058.3	0.551673	0.000921364	1	1	1
ENSG00000267796	LIN37	0.551794	0.000931823	1	1	1
ENSG00000139174	PRICKLE1	0.55181	0.00125745	1	1	1
ENSG00000154556	SORBS2	0.551881	0.000648964	1	1	1
ENSG00000173715	C11orf80	0.5519	0.000483268	1	1	1
ENSG00000090097	PCBP4	0.551919	0.00126937	1	1	1
ENSG00000253873	PCDHGA11	0.552004	0.000480992	1	1	1
ENSG00000171161	ZNF672	0.552105	0.000819973	1	1	1
ENSG00000198797	BRINP2	0.552159	0.000419859	1	1	1
ENSG00000168000	BSCL2	0.552207	0.00130802	1	1	1
ENSG00000040933	INPP4A	0.552239	0.00126904	1	1	1
ENSG00000135441	BLOC1S1	0.552253	0.000548791	1	1	1
ENSG00000185344	ATP6V0A2	0.552316	0.000752558	1	1	1
ENSG00000150394	CDH8	0.552344	0.000652888	1	1	1
ENSG00000105650	PDE4C	0.552448	0.000638842	1	1	1
ENSG00000164885	CDK5	0.552554	0.00129355	1	1	1
ENSG00000271869	AC026979.2	0.552587	0.000290242	1	1	1
ENSG00000122033	MTIF3	0.552751	0.000730878	1	1	1
ENSG00000137267	TUBB2A	0.552767	0.00125465	1	1	1
ENSG00000253629	AP000426.1	0.55278	0.000773389	1	1	1
ENSG00000148935	GAS2	0.552885	0.000310925	1	1	1
ENSG00000134874	DZIP1	0.552935	0.00115622	1	1	1
ENSG00000101327	PDYN	0.552956	0.00125465	1	0	0
ENSG00000115252	PDE1A	0.553016	0.00137024	1	1	1
ENSG00000278195	SSTR3	0.553096	0.000778887	1	1	1
ENSG00000154655	L3MBTL4	0.553242	0.000309988	1	1	1
ENSG00000062282	DGAT2	0.55325	0.000637782	1	1	1
ENSG00000100583	SAMD15	0.553261	0.000750374	1	1	1
ENSG00000171604	CXXC5	0.553334	0.00226134	1	1	1
ENSG00000078668	VDAC3	0.553338	0.00158761	1	1	1
ENSG00000151090	THRB	0.553466	0.000958463	1	1	1
ENSG00000171132	PRKCE	0.55349	0.00163928	1	1	1
ENSG00000169087	HSPBAP1	0.553514	0.00112267	1	1	1
ENSG00000151834	GABRA2	0.553541	0.00122152	1	1	1
ENSG00000197714	ZNF460	0.553581	0.000365178	1	1	1
ENSG00000175175	PPM1E	0.553746	0.00195442	1	1	1
ENSG00000130584	ZBTB46	0.553973	0.000381668	1	1	1
ENSG00000156467	UQCRB	0.553993	0.000640173	1	1	1
ENSG00000155893	PXYLP1	0.554045	0.000732882	1	1	1
ENSG00000157064	NMNAT2	0.554049	0.000838315	1	1	1
ENSG00000171488	LRRC8C	0.554052	0.000425208	1	1	1
ENSG00000166924	NYAP1	0.55415	0.00122045	1	1	1
ENSG00000198712	MT-CO2	0.554163	0.000845772	1	0	1
ENSG00000099624	ATP5F1D	0.554277	0.000785459	1	1	1
ENSG00000130731	METTL26	0.554289	0.000804163	1	1	1
ENSG00000275340	FGD5P1	0.554387	0.000771338	1	0	1
ENSG00000008324	SS18L2	0.554437	0.0012998	1	1	1
ENSG00000134057	CCNB1	0.554445	0.00133229	1	0	1
ENSG00000233427	AL009181.1	0.554613	0.000369412	1	0	1
ENSG00000126950	TMEM35A	0.554875	0.00151292	1	1	1
ENSG00000144893	MED12L	0.554966	0.00531333	1	1	1
ENSG00000078900	TP73	0.55498	0.000716655	1	1	1
ENSG00000091972	CD200	0.554988	0.000637782	1	1	1
ENSG00000180884	ZNF792	0.555024	0.000511119	1	1	1
ENSG00000082482	KCNK2	0.555167	0.00129355	1	0	1
ENSG00000167130	DOLPP1	0.555209	0.000441581	1	1	1
ENSG00000166823	MESP1	0.555224	0.000255172	1	1	1
ENSG00000134107	BHLHE40	0.555324	0.000344418	1	1	1
ENSG00000112530	PACRG	0.555476	0.001708	1	1	1
ENSG00000276408	AC025287.2	0.555517	0.000974293	1	1	1
ENSG00000147647	DPYS	0.555731	0.000766597	1	0	1
ENSG00000161381	PLXDC1	0.555822	0.000660506	1	1	1
ENSG00000197982	C1orf122	0.555861	0.000279505	1	1	1
ENSG00000103121	CMC2	0.555917	0.000849603	1	1	1
ENSG00000168234	TTC39C	0.555931	0.000979842	1	1	1
ENSG00000134775	FHOD3	0.555954	0.000843997	1	1	1
ENSG00000165985	C1QL3	0.555965	0.00143156	1	0	1
ENSG00000006128	TAC1	0.556134	0.000874612	1	0	1
ENSG00000188211	NCR3LG1	0.55614	0.00264614	1	1	1
ENSG00000170390	DCLK2	0.556191	0.000910634	1	1	1
ENSG00000104290	FZD3	0.55623	0.00132168	1	1	1
ENSG00000225465	RFPL1S	0.556286	0.000515312	1	1	1
ENSG00000152413	HOMER1	0.556325	0.00100299	1	1	1
ENSG00000163577	EIF5A2	0.556366	0.000518129	1	1	1
ENSG00000130522	JUND	0.556374	0.000852082	1	1	1
ENSG00000184076	UQCR10	0.556592	0.000913131	1	1	1
ENSG00000275131	AC241952.1	0.556597	0.000917905	1	1	1
ENSG00000009724	MASP2	0.55663	0.000643829	1	1	1
ENSG00000182580	EPHB3	0.556649	0.000301195	1	1	1
ENSG00000174791	RIN1	0.55668	0.000391905	1	1	1
ENSG00000261934	PCDHGA9	0.556695	0.000931823	1	1	1
ENSG00000162621	LRRC53	0.556728	0.000884562	1	0	1
ENSG00000026559	KCNG1	0.556729	0.000577817	1	0	1
ENSG00000188290	HES4	0.556806	0.00065121	1	1	1
ENSG00000218227	AC136632.1	0.556828	0.00057508	1	1	1
ENSG00000280304	AC104260.2	0.556904	0.00121444	1	1	1
ENSG00000240771	ARHGEF25	0.556906	0.00124101	1	1	1
ENSG00000166111	SVOP	0.556907	0.00104909	1	1	1
ENSG00000104369	JPH1	0.556912	0.00091309	1	1	1
ENSG00000197860	SGTB	0.557143	0.00178945	1	1	1
ENSG00000109881	CCDC34	0.557154	0.00314697	1	1	1
ENSG00000109452	INPP4B	0.557265	0.00106124	1	1	1
ENSG00000241570	PAQR9-AS1	0.557311	0.00139435	1	1	1
ENSG00000143013	LMO4	0.557344	0.00121944	1	1	1
ENSG00000243449	C4orf48	0.557347	0.000859107	1	1	1
ENSG00000179295	PTPN11	0.557445	0.000791631	1	1	1
ENSG00000263986	AC087393.2	0.557463	0.00107774	1	1	1
ENSG00000262758	ENSG00000262758	0.557523	0.00135975	1	1	1
ENSG00000167526	RPL13	0.557637	0.00153903	1	1	1
ENSG00000265313	LINC01476	0.55775	0.000669775	1	1	1
ENSG00000176490	DIRAS1	0.557798	0.00108398	1	1	1
ENSG00000171502	COL24A1	0.55782	0.000939005	1	0	1
ENSG00000130770	ATP5IF1	0.557872	0.000687154	1	1	1
ENSG00000066629	EML1	0.557931	0.000381668	1	1	1
ENSG00000166603	MC4R	0.558005	0.00119464	1	0	1
ENSG00000146267	FAXC	0.558075	0.00125855	1	1	1
ENSG00000127824	TUBA4A	0.558106	0.00136162	1	1	1
ENSG00000102103	PQBP1	0.558116	0.00104996	1	1	1
ENSG00000150471	ADGRL3	0.558143	0.00265235	1	1	1
ENSG00000099385	BCL7C	0.558186	0.00219917	1	1	1
ENSG00000173227	SYT12	0.55827	0.000770478	1	1	1
ENSG00000167969	ECI1	0.558272	0.000637782	1	1	1
ENSG00000100379	KCTD17	0.558291	0.000279703	1	1	1
ENSG00000150995	ITPR1	0.558304	0.00140986	1	1	1
ENSG00000109944	JHY	0.558306	0.00103004	1	1	1
ENSG00000203950	RTL8A	0.558332	0.00171305	1	1	1
ENSG00000108298	RPL19	0.558359	0.00143382	1	1	1
ENSG00000260101	AC008074.3	0.55845	0.00118037	1	1	1
ENSG00000146963	LUC7L2	0.558477	0.00126644	1	1	1
ENSG00000125266	EFNB2	0.558548	0.00225626	1	1	1
ENSG00000055118	KCNH2	0.558562	0.000500826	1	1	1
ENSG00000040275	SPDL1	0.558634	0.00112179	1	1	1
ENSG00000116497	S100PBP	0.558705	0.00126948	1	1	1
ENSG00000106615	RHEB	0.5588	0.00121444	1	1	1
ENSG00000175077	RTP1	0.558849	0.00124101	1	1	1
ENSG00000133858	ZFC3H1	0.559056	0.000775502	1	1	1
ENSG00000108021	FAM208B	0.559086	0.00065121	1	1	1
ENSG00000197183	NOL4L	0.559157	0.000652888	1	1	1
ENSG00000169554	ZEB2	0.55922	0.00115756	1	1	1
ENSG00000092068	SLC7A8	0.559279	0.000829686	1	1	1
ENSG00000071859	FAM50A	0.559291	0.00121891	1	1	1
ENSG00000259863	SH3RF3-AS1	0.559294	0.000595421	1	1	1
ENSG00000105767	CADM4	0.559329	0.00867114	1	1	1
ENSG00000260336	ENSG00000260336	0.559381	0.00120637	1	1	1
ENSG00000106789	CORO2A	0.559473	0.000769464	1	1	1
ENSG00000154262	ABCA6	0.55954	0.00127718	1	1	1
ENSG00000070669	ASNS	0.559556	0.00177457	1	1	1
ENSG00000143774	GUK1	0.55966	0.000884218	1	1	1
ENSG00000227082	AC244021.1	0.559676	0.00060558	1	1	1
ENSG00000116983	HPCAL4	0.559784	0.00110774	1	1	1
ENSG00000240253	FAR2P3	0.559834	0.00207239	1	1	1
ENSG00000183092	BEGAIN	0.559908	0.00071625	1	1	1
ENSG00000164172	MOCS2	0.559917	0.000348594	1	1	1
ENSG00000184007	PTP4A2	0.559987	0.00152217	1	1	1
ENSG00000120053	GOT1	0.56005	0.00186874	1	1	1
ENSG00000155761	SPAG17	0.560121	0.0007519	1	1	1
ENSG00000104529	EEF1D	0.56013	0.00127753	1	1	1
ENSG00000168824	NSG1	0.560223	0.00137728	1	1	1
ENSG00000170949	ZNF160	0.560223	0.00117815	1	1	1
ENSG00000128581	IFT22	0.560235	0.00107496	1	1	1
ENSG00000008283	CYB561	0.5603	0.00104811	1	1	1
ENSG00000160973	FOXH1	0.560403	0.000536318	1	1	1
ENSG00000121410	A1BG	0.56053	0.00135048	1	1	1
ENSG00000204186	ZDBF2	0.560611	0.00216407	1	1	1
ENSG00000159352	PSMD4	0.560798	0.000981002	1	1	1
ENSG00000186675	MAGEE2	0.560848	0.00143342	1	0	1
ENSG00000267125	AC012615.3	0.560952	0.000345907	1	1	1
ENSG00000122644	ARL4A	0.560966	0.00196707	1	1	1
ENSG00000133316	WDR74	0.561	0.00146092	1	1	1
ENSG00000100105	PATZ1	0.561004	0.00119671	1	1	1
ENSG00000153558	FBXL2	0.561094	0.00152217	1	1	1
ENSG00000198888	MT-ND1	0.561099	0.000902377	1	0	1
ENSG00000078053	AMPH	0.561113	0.00149065	1	1	1
ENSG00000158292	GPR153	0.561141	0.000773389	1	1	1
ENSG00000066923	STAG3	0.561197	0.00124335	1	1	1
ENSG00000271417	ENSG00000271417	0.561305	0.000852082	1	1	1
ENSG00000131016	AKAP12	0.561313	0.00166018	1	1	1
ENSG00000172889	EGFL7	0.561323	0.000556813	1	1	1
ENSG00000164142	FAM160A1	0.561366	0.000638842	1	1	1
ENSG00000095203	EPB41L4B	0.561459	0.00103004	1	1	1
ENSG00000133142	TCEAL4	0.56147	0.00183116	1	1	1
ENSG00000182165	TP53TG1	0.561533	0.00130886	1	1	1
ENSG00000159259	CHAF1B	0.561576	0.00110253	1	1	1
ENSG00000173327	MAP3K11	0.561807	0.000829686	1	1	1
ENSG00000258702	AL137786.1	0.561814	0.0013343	1	0	1
ENSG00000186854	TRABD2A	0.561898	0.00110659	1	1	1
ENSG00000220804	LINC01881	0.561916	0.000552352	1	1	1
ENSG00000158417	EIF5B	0.561927	0.00101651	1	1	1
ENSG00000272031	ANKRD34A	0.561933	0.00115211	1	1	1
ENSG00000261675	AL022313.4	0.561933	0.0203748	1	1	1
ENSG00000176946	THAP4	0.56199	0.00104996	1	1	1
ENSG00000188906	LRRK2	0.562098	0.00191901	1	1	1
ENSG00000168016	TRANK1	0.562183	0.000954184	1	1	1
ENSG00000173915	ATP5MD	0.562184	0.000449445	1	1	1
ENSG00000254929	AL591684.2	0.562275	0.00132996	1	1	1
ENSG00000097021	ACOT7	0.562284	0.00216869	1	1	1
ENSG00000172350	ABCG4	0.562389	0.0012662	1	1	1
ENSG00000213413	PVRIG	0.562403	0.000419897	1	1	1
ENSG00000141750	STAC2	0.562415	0.000880657	1	1	1
ENSG00000152104	PTPN14	0.562416	0.0016083	1	1	1
ENSG00000104825	NFKBIB	0.562422	0.00269988	1	1	1
ENSG00000115738	ID2	0.562495	0.00176771	1	1	1
ENSG00000100211	CBY1	0.562576	0.0016959	1	1	1
ENSG00000124614	RPS10	0.562587	0.00125465	1	1	1
ENSG00000175115	PACS1	0.562601	0.000399149	1	1	1
ENSG00000128805	ARHGAP22	0.562637	0.0018	1	1	1
ENSG00000133110	POSTN	0.562733	0.00102134	1	0	0
ENSG00000225383	SFTA1P	0.562872	0.000621137	1	1	1
ENSG00000130751	NPAS1	0.562882	0.000771338	1	1	1
ENSG00000215845	TSTD1	0.562885	0.00113523	1	1	1
ENSG00000167468	GPX4	0.562955	0.000657284	1	1	1
ENSG00000110047	EHD1	0.562963	0.000941208	1	1	1
ENSG00000008988	RPS20	0.563051	0.00148651	1	1	1
ENSG00000205323	SARNP	0.563081	0.00180986	1	1	1
ENSG00000152034	MCHR2	0.563105	0.000730878	1	0	1
ENSG00000113749	HRH2	0.56321	0.00153903	1	0	1
ENSG00000147789	ZNF7	0.563215	0.00128558	1	1	1
ENSG00000259758	ENSG00000259758	0.563295	0.000990414	1	1	1
ENSG00000185915	KLHL34	0.563349	0.00154531	1	0	1
ENSG00000198825	INPP5F	0.563352	0.00288446	1	1	1
ENSG00000102078	SLC25A14	0.563364	0.00200371	1	1	1
ENSG00000253485	PCDHGA5	0.563386	0.00126937	1	1	1
ENSG00000186188	FFAR4	0.563443	0.00579998	1	1	1
ENSG00000082126	MPP4	0.563459	0.000400579	1	1	1
ENSG00000125743	SNRPD2	0.563539	0.00207192	1	1	1
ENSG00000051341	POLQ	0.563547	0.00102862	1	0	0
ENSG00000272888	LINC01578	0.563571	0.00149976	1	1	1
ENSG00000169946	ZFPM2	0.563583	0.000513893	1	1	1
ENSG00000241563	CORT	0.563586	0.000699811	1	1	1
ENSG00000005884	ITGA3	0.563598	0.000490691	1	1	1
ENSG00000114383	TUSC2	0.563605	0.000850553	1	1	1
ENSG00000102290	PCDH11X	0.563627	0.0013954	1	1	1
ENSG00000111642	CHD4	0.563669	0.00146059	1	1	1
ENSG00000168763	CNNM3	0.563683	0.000790546	1	1	1
ENSG00000131495	NDUFA2	0.563758	0.00141924	1	1	1
ENSG00000158806	NPM2	0.563786	0.00154295	1	1	1
ENSG00000136854	STXBP1	0.563855	0.00128247	1	1	1
ENSG00000105619	TFPT	0.564052	0.000595421	1	1	1
ENSG00000101331	CCM2L	0.564072	0.000817262	1	1	1
ENSG00000273079	GRIN2B	0.56417	0.00130886	1	0	1
ENSG00000213741	RPS29	0.564211	0.00216618	1	1	1
ENSG00000279573	AC134407.2	0.564242	0.00157226	1	1	1
ENSG00000198899	MT-ATP6	0.564277	0.00121944	1	0	1
ENSG00000140987	ZSCAN32	0.564293	0.000611902	1	1	1
ENSG00000170027	YWHAG	0.564325	0.00148651	1	1	1
ENSG00000160396	HIPK4	0.56439	0.00121944	1	1	1
ENSG00000248592	TMEM110-MUSTN1	0.564447	0.00136635	1	1	1
ENSG00000142408	CACNG8	0.564524	0.00133213	1	1	1
ENSG00000006625	GGCT	0.564555	0.00270414	1	1	1
ENSG00000175581	MRPL48	0.564591	0.00146059	1	1	1
ENSG00000159055	MIS18A	0.564607	0.000866828	1	1	1
ENSG00000135164	DMTF1	0.564634	0.00057429	1	1	1
ENSG00000267007	AC012615.2	0.564658	0.000497961	1	1	1
ENSG00000074706	IPCEF1	0.564662	0.00179549	1	1	1
ENSG00000166704	ZNF606	0.564671	0.00147887	1	1	1
ENSG00000006740	ARHGAP44	0.564679	0.00158834	1	1	1
ENSG00000262049	AC139530.1	0.564686	0.00325063	1	1	1
ENSG00000010244	ZNF207	0.56475	0.000441581	1	1	1
ENSG00000128654	MTX2	0.564922	0.00149065	1	1	1
ENSG00000172232	AZU1	0.564982	0.000416157	1	1	1
ENSG00000197461	PDGFA	0.565	0.00252239	1	1	1
ENSG00000101333	PLCB4	0.565064	0.000716805	1	1	1
ENSG00000253953	PCDHGB4	0.5651	0.00126036	1	1	1
ENSG00000129595	EPB41L4A	0.565258	0.00112882	1	1	1
ENSG00000122779	TRIM24	0.565344	0.0014628	1	1	1
ENSG00000184408	KCND2	0.565386	0.000536318	1	1	1
ENSG00000105357	MYH14	0.56539	0.00564478	1	1	1
ENSG00000134222	PSRC1	0.565521	0.000729922	1	1	1
ENSG00000175426	PCSK1	0.565526	0.001708	1	1	1
ENSG00000215475	SIAH3	0.565549	0.000906936	1	1	1
ENSG00000186710	CFAP73	0.565658	0.00133486	1	1	1
ENSG00000198517	MAFK	0.565756	0.00140636	1	1	1
ENSG00000136942	RPL35	0.565838	0.00152372	1	1	1
ENSG00000068650	ATP11A	0.565861	0.00122526	1	1	1
ENSG00000213760	ATP6V1G2	0.565915	0.00163928	1	1	1
ENSG00000165973	NELL1	0.565963	0.00236836	1	1	1
ENSG00000250686	AL049544.1	0.565974	0.00102517	1	1	1
ENSG00000182196	ARL6IP4	0.566033	0.00241588	1	1	1
ENSG00000108395	TRIM37	0.566063	0.00198559	1	1	1
ENSG00000111696	NT5DC3	0.566092	0.00184307	1	1	1
ENSG00000260878	AC104072.1	0.566148	0.00166132	1	1	1
ENSG00000182389	CACNB4	0.566308	0.00206276	1	1	1
ENSG00000144366	GULP1	0.566389	0.00241588	1	1	1
ENSG00000161016	RPL8	0.56643	0.00176771	1	1	1
ENSG00000203685	STUM	0.56649	0.00432291	1	0	1
ENSG00000108231	LGI1	0.566535	0.00118037	1	1	1
ENSG00000060237	WNK1	0.566597	0.0016083	1	1	1
ENSG00000114573	ATP6V1A	0.566874	0.00269424	1	1	1
ENSG00000165323	FAT3	0.566994	0.00161414	1	1	1
ENSG00000110080	ST3GAL4	0.567023	0.00202118	1	1	1
ENSG00000204052	LRRC73	0.567039	0.00148699	1	1	1
ENSG00000101391	CDK5RAP1	0.567126	0.00132123	1	1	1
ENSG00000175497	DPP10	0.567228	0.00241528	1	1	1
ENSG00000107745	MICU1	0.567237	0.000812862	1	1	1
ENSG00000196990	FAM163B	0.567248	0.00134531	1	1	1
ENSG00000234423	LINC01250	0.567346	0.00146742	1	0	1
ENSG00000134686	PHC2	0.567384	0.00161414	1	1	1
ENSG00000149970	CNKSR2	0.567385	0.000808999	1	1	1
ENSG00000254122	PCDHGB7	0.56741	0.00146052	1	1	1
ENSG00000161980	POLR3K	0.567415	0.000438393	1	1	1
ENSG00000152495	CAMK4	0.567418	0.000744703	1	1	1
ENSG00000116141	MARK1	0.567419	0.00192772	1	1	1
ENSG00000176884	GRIN1	0.567528	0.00103004	1	1	1
ENSG00000267022	AC067968.1	0.567557	0.00148125	1	1	1
ENSG00000170906	NDUFA3	0.567581	0.00136162	1	1	1
ENSG00000273275	AC017083.2	0.567586	0.00119889	1	1	1
ENSG00000144580	CNOT9	0.56761	0.00112897	1	1	1
ENSG00000251369	ZNF550	0.567634	0.000511591	1	1	1
ENSG00000165644	COMTD1	0.567721	0.000636543	1	1	1
ENSG00000064199	SPA17	0.567797	0.0017826	1	1	1
ENSG00000179097	HTR1F	0.567817	0.00146551	1	0	1
ENSG00000119787	ATL2	0.567908	0.00142298	1	1	1
ENSG00000204172	AGAP9	0.567942	0.00126439	1	1	1
ENSG00000276075	AC027682.6	0.567968	0.000687154	1	1	1
ENSG00000268573	AC011815.1	0.568025	0.00063929	1	1	1
ENSG00000260328	AC104024.2	0.568107	0.00130249	1	1	1
ENSG00000175220	ARHGAP1	0.568109	0.00290704	1	1	1
ENSG00000164600	NEUROD6	0.568145	0.00209038	1	1	1
ENSG00000233723	LINC01122	0.568154	0.00152217	1	1	1
ENSG00000152931	PART1	0.568168	0.00171151	1	1	1
ENSG00000257103	LSM14A	0.568179	0.00363322	1	1	1
ENSG00000179796	LRRC3B	0.568383	0.000571148	1	1	1
ENSG00000230417	LINC00595	0.56849	0.00198304	1	0	1
ENSG00000102924	CBLN1	0.568527	0.000786959	1	1	1
ENSG00000105887	MTPN	0.568541	0.00393946	1	1	1
ENSG00000122873	CISD1	0.568543	0.002936	1	1	1
ENSG00000251246	AL691442.1	0.568624	0.00126666	1	1	1
ENSG00000163701	IL17RE	0.568648	0.00103698	1	1	1
ENSG00000277420	AC245407.2	0.568711	0.00137511	1	0	1
ENSG00000186001	LRCH3	0.568733	0.00151895	1	1	1
ENSG00000214253	FIS1	0.568772	0.00127707	1	1	1
ENSG00000198858	R3HDM4	0.568787	0.00121944	1	1	1
ENSG00000198915	RASGEF1A	0.568841	0.0016745	1	1	1
ENSG00000232388	SMIM26	0.568882	0.0105017	1	1	1
ENSG00000260448	LCMT1-AS1	0.568889	0.000571876	1	1	1
ENSG00000257365	FNTB	0.568891	0.00168908	1	1	1
ENSG00000143067	ZNF697	0.568961	0.00216549	1	1	1
ENSG00000248593	DSTNP2	0.568967	0.00127029	1	1	1
ENSG00000117602	RCAN3	0.569102	0.00165026	1	1	1
ENSG00000261496	ENSG00000261496	0.569114	0.00125465	1	1	1
ENSG00000185269	NOTUM	0.569137	0.00104996	1	1	1
ENSG00000151490	PTPRO	0.569174	0.00370754	1	1	1
ENSG00000143878	RHOB	0.569241	0.000704315	1	1	1
ENSG00000105176	URI1	0.56937	0.00119042	1	1	1
ENSG00000028528	SNX1	0.569388	0.0018881	1	1	1
ENSG00000248905	FMN1	0.569397	0.00256256	1	1	1
ENSG00000164122	ASB5	0.56941	0.00117256	1	1	1
ENSG00000082293	COL19A1	0.569435	0.00148125	1	1	1
ENSG00000111249	CUX2	0.569439	0.00131729	1	1	1
ENSG00000099804	CDC34	0.569596	0.000558252	1	1	1
ENSG00000125740	FOSB	0.569612	0.000629575	1	1	1
ENSG00000178974	FBXO34	0.569621	0.00427109	1	1	1
ENSG00000162738	VANGL2	0.569625	0.000759003	1	1	1
ENSG00000236279	CLEC2L	0.569643	0.00146742	1	1	1
ENSG00000214026	MRPL23	0.569683	0.00113419	1	1	1
ENSG00000114391	RPL24	0.569694	0.00163443	1	1	1
ENSG00000168734	PKIG	0.569704	0.00120984	1	1	1
ENSG00000143196	DPT	0.56986	0.000950842	1	1	1
ENSG00000048991	R3HDM1	0.569874	0.00133229	1	1	1
ENSG00000251011	TMEM108-AS1	0.569901	0.00130195	1	0	1
ENSG00000171714	ANO5	0.569945	0.00188941	1	1	1
ENSG00000124772	CPNE5	0.569967	0.00195315	1	1	1
ENSG00000162992	NEUROD1	0.570046	0.000814599	1	1	1
ENSG00000243710	CFAP57	0.570116	0.000792454	1	1	1
ENSG00000143995	MEIS1	0.570131	0.00150238	1	1	1
ENSG00000198963	RORB	0.570284	0.00159044	1	1	1
ENSG00000111832	RWDD1	0.570304	0.00172484	1	1	1
ENSG00000136999	NOV	0.570307	0.00155688	1	0	1
ENSG00000248115	AC023154.1	0.570319	0.00220538	1	0	1
ENSG00000137656	BUD13	0.570375	0.00484778	1	1	1
ENSG00000173404	INSM1	0.570381	0.00105452	1	1	1
ENSG00000143198	MGST3	0.570391	0.000869486	1	1	1
ENSG00000196090	PTPRT	0.570397	0.00193073	1	0	1
ENSG00000132294	EFR3A	0.570442	0.00142696	1	1	1
ENSG00000275004	ZNF280B	0.570442	0.00228926	1	1	1
ENSG00000174307	PHLDA3	0.570446	0.00179609	1	1	1
ENSG00000147804	SLC39A4	0.570506	0.00128299	1	1	1
ENSG00000164048	ZNF589	0.570513	0.00137183	1	1	1
ENSG00000145808	ADAMTS19	0.570552	0.00118958	1	1	1
ENSG00000149926	FAM57B	0.570566	0.000965031	1	1	1
ENSG00000268182	SMIM17	0.570567	0.00149976	1	1	1
ENSG00000248309	MEF2C-AS1	0.570601	0.00151944	1	1	1
ENSG00000196510	ANAPC7	0.570644	0.000840557	1	1	1
ENSG00000183340	JRKL	0.570826	0.000610679	1	1	1
ENSG00000179271	GADD45GIP1	0.570831	0.00130431	1	1	1
ENSG00000009413	REV3L	0.570877	0.00136635	1	1	1
ENSG00000240682	ISY1	0.570916	0.001708	1	1	1
ENSG00000047579	DTNBP1	0.570968	0.000662844	1	1	1
ENSG00000198886	MT-ND4	0.570978	0.00191521	1	0	1
ENSG00000116288	PARK7	0.57102	0.00144407	1	1	1
ENSG00000117713	ARID1A	0.571075	0.000590066	1	1	1
ENSG00000211459	MT-RNR1	0.571104	0.00279849	1	0	1
ENSG00000196683	TOMM7	0.571169	0.00121891	1	1	1
ENSG00000164484	TMEM200A	0.571183	0.00260342	1	1	1
ENSG00000189212	DPY19L2P1	0.571346	0.00105066	1	1	1
ENSG00000179262	RAD23A	0.57135	0.00546952	1	1	1
ENSG00000129993	CBFA2T3	0.571354	0.000638842	1	1	1
ENSG00000137642	SORL1	0.571364	0.00166018	1	1	1
ENSG00000112893	MAN2A1	0.571381	0.000841462	1	1	1
ENSG00000163833	FBXO40	0.571382	0.00157512	1	1	1
ENSG00000159248	GJD2	0.571783	0.00363322	1	1	1
ENSG00000131069	ACSS2	0.571785	0.00194375	1	1	1
ENSG00000048405	ZNF800	0.571803	0.000549094	1	1	1
ENSG00000196950	SLC39A10	0.571853	0.00334403	1	1	1
ENSG00000279159	AC003681.1	0.571865	0.00252239	1	1	1
ENSG00000279500	AC108704.2	0.571934	0.00175935	1	1	1
ENSG00000170889	RPS9	0.571946	0.00208504	1	1	1
ENSG00000170873	MTSS1	0.572129	0.002171	1	1	1
ENSG00000215271	HOMEZ	0.572182	0.00273041	1	1	1
ENSG00000100099	HPS4	0.572199	0.00114174	1	1	1
ENSG00000177614	PGBD5	0.572202	0.00216201	1	1	1
ENSG00000147416	ATP6V1B2	0.572244	0.001875	1	1	1
ENSG00000185774	KCNIP4	0.572272	0.00208145	1	1	1
ENSG00000100473	COCH	0.572358	0.00121452	1	1	1
ENSG00000155846	PPARGC1B	0.572372	0.00133213	1	1	1
ENSG00000175229	GAL3ST3	0.572417	0.00209398	1	1	1
ENSG00000110717	NDUFS8	0.572424	0.00218303	1	1	1
ENSG00000174514	MFSD4A	0.572577	0.00261242	1	1	1
ENSG00000107077	KDM4C	0.572718	0.00139441	1	1	1
ENSG00000144285	SCN1A	0.572742	0.00186199	1	1	1
ENSG00000278730	AC005332.7	0.572758	0.00166132	1	1	1
ENSG00000154548	SRSF12	0.572824	0.00224619	1	1	1
ENSG00000261884	AC040162.1	0.572854	0.00114806	1	1	1
ENSG00000167118	URM1	0.572878	0.0021953	1	1	1
ENSG00000141456	PELP1	0.572951	0.000720913	1	1	1
ENSG00000171224	FAM241B	0.572953	0.00130249	1	1	1
ENSG00000130733	YIPF2	0.573069	0.00196893	1	1	1
ENSG00000106400	ZNHIT1	0.573126	0.00476598	1	1	1
ENSG00000112964	GHR	0.573156	0.000982966	1	1	1
ENSG00000197056	ZMYM1	0.573181	0.000993902	1	1	1
ENSG00000273287	AL008718.2	0.573237	0.00105587	1	1	1
ENSG00000165338	HECTD2	0.573259	0.00275251	1	1	1
ENSG00000182732	RGS6	0.573278	0.00152217	1	1	1
ENSG00000130724	CHMP2A	0.573363	0.00194337	1	1	1
ENSG00000151948	GLT1D1	0.57337	0.00198304	1	1	1
ENSG00000125485	DDX31	0.573391	0.00186055	1	1	1
ENSG00000262304	AC027796.3	0.573461	0.00299182	1	1	1
ENSG00000139899	CBLN3	0.573522	0.00178945	1	1	1
ENSG00000122435	TRMT13	0.573539	0.00301249	1	1	1
ENSG00000065054	SLC9A3R2	0.573545	0.00182416	1	1	1
ENSG00000204856	FAM216A	0.573614	0.00275367	1	1	1
ENSG00000132478	UNK	0.573634	0.00340736	1	1	1
ENSG00000142546	NOSIP	0.57366	0.000664408	1	1	1
ENSG00000120251	GRIA2	0.573684	0.00276469	1	1	1
ENSG00000279332	AC090772.4	0.573693	0.00105066	1	1	1
ENSG00000090534	THPO	0.573694	0.000955646	1	1	1
ENSG00000060688	SNRNP40	0.573821	0.00215891	1	1	1
ENSG00000213585	VDAC1	0.573828	0.00322231	1	1	1
ENSG00000177410	ZFAS1	0.573869	0.00207641	1	1	1
ENSG00000130477	UNC13A	0.57394	0.00191183	1	1	1
ENSG00000255498	AC068385.1	0.57398	0.00251286	1	1	1
ENSG00000082515	MRPL22	0.574057	0.00060558	1	1	1
ENSG00000106852	LHX6	0.574076	0.00179493	1	1	1
ENSG00000141098	GFOD2	0.574124	0.000759892	1	1	1
ENSG00000132938	MTUS2	0.574133	0.00217071	1	1	1
ENSG00000074527	NTN4	0.574141	0.00321515	1	1	1
ENSG00000185909	KLHDC8B	0.574141	0.00108631	1	1	1
ENSG00000112306	RPS12	0.5742	0.0023685	1	1	1
ENSG00000171448	ZBTB26	0.574219	0.000650751	1	1	1
ENSG00000260081	AF274858.1	0.574239	0.00163857	1	1	1
ENSG00000125954	CHURC1-FNTB	0.574339	0.00114224	1	1	1
ENSG00000173757	STAT5B	0.57447	0.00164311	1	1	1
ENSG00000133134	BEX2	0.574494	0.00212444	1	1	1
ENSG00000067842	ATP2B3	0.574541	0.00203446	1	1	1
ENSG00000186260	MKL2	0.57457	0.00303652	1	1	1
ENSG00000182329	KIAA2012	0.574582	0.00134487	1	1	1
ENSG00000183828	NUDT14	0.574724	0.00152435	1	1	1
ENSG00000159450	TCHH	0.574814	0.00229344	1	0	1
ENSG00000176697	BDNF	0.575064	0.00209363	1	1	1
ENSG00000185361	TNFAIP8L1	0.575168	0.00242342	1	1	1
ENSG00000171004	HS6ST2	0.575263	0.00221151	1	1	1
ENSG00000185518	SV2B	0.575293	0.0026223	1	1	1
ENSG00000115350	POLE4	0.575302	0.00115042	1	1	1
ENSG00000212907	MT-ND4L	0.575325	0.0015834	1	1	1
ENSG00000270231	NBPF8	0.575442	0.000696445	1	1	1
ENSG00000114923	SLC4A3	0.575444	0.00200912	1	1	1
ENSG00000102931	ARL2BP	0.575484	0.000759346	1	1	1
ENSG00000038295	TLL1	0.575498	0.00112882	1	1	1
ENSG00000171813	PWWP2B	0.575596	0.00133229	1	1	1
ENSG00000146858	ZC3HAV1L	0.575645	0.00179148	1	1	1
ENSG00000106415	GLCCI1	0.575651	0.00110253	1	1	1
ENSG00000269621	AL589765.7	0.575676	0.00166943	1	1	1
ENSG00000116544	DLGAP3	0.575788	0.00166867	1	1	1
ENSG00000231764	DLX6-AS1	0.575869	0.00266599	1	0	1
ENSG00000138639	ARHGAP24	0.575881	0.00166943	1	1	1
ENSG00000080819	CPOX	0.575951	0.00259461	1	1	1
ENSG00000145087	STXBP5L	0.576	0.0027826	1	1	1
ENSG00000184731	FAM110C	0.576015	0.00101843	1	1	1
ENSG00000100225	FBXO7	0.576063	0.00221122	1	1	1
ENSG00000002330	BAD	0.576075	0.00127166	1	1	1
ENSG00000055950	MRPL43	0.576109	0.00110851	1	1	1
ENSG00000128285	MCHR1	0.576193	0.00256554	1	1	1
ENSG00000106328	FSCN3	0.576283	0.00226134	1	1	1
ENSG00000197106	SLC6A17	0.576317	0.00211717	1	1	1
ENSG00000100092	SH3BP1	0.576392	0.00297438	1	1	1
ENSG00000260918	AC107398.3	0.57648	0.00207192	1	1	1
ENSG00000072501	SMC1A	0.576491	0.00180686	1	1	1
ENSG00000107223	EDF1	0.576554	0.00407978	1	1	1
ENSG00000189129	PLAC9	0.576561	0.000950842	1	1	1
ENSG00000242485	MRPL20	0.576574	0.00109733	1	1	1
ENSG00000279592	AC010653.2	0.576589	0.00124868	1	1	1
ENSG00000166159	LRTM2	0.576611	0.00238691	1	1	1
ENSG00000175352	NRIP3	0.576637	0.002171	1	1	1
ENSG00000206557	TRIM71	0.576667	0.00143907	1	1	1
ENSG00000140391	TSPAN3	0.576812	0.00299789	1	1	1
ENSG00000125970	RALY	0.576821	0.00390754	1	1	1
ENSG00000104419	NDRG1	0.576853	0.00287925	1	1	1
ENSG00000185133	INPP5J	0.576892	0.0040242	1	1	1
ENSG00000142676	RPL11	0.576895	0.00314697	1	1	1
ENSG00000096060	FKBP5	0.576913	0.00350135	1	1	1
ENSG00000112796	ENPP5	0.576922	0.00243591	1	1	1
ENSG00000111752	PHC1	0.576926	0.00241528	1	1	1
ENSG00000161544	CYGB	0.576963	0.00180002	1	1	1
ENSG00000135083	CCNJL	0.577025	0.0016621	1	1	1
ENSG00000171724	VAT1L	0.577031	0.0029168	1	1	1
ENSG00000123352	SPATS2	0.57706	0.00191927	1	1	1
ENSG00000101158	NELFCD	0.577129	0.00216549	1	1	1
ENSG00000164402	SEPT8	0.577231	0.00203623	1	1	1
ENSG00000164270	HTR4	0.577256	0.00239397	1	0	1
ENSG00000167889	MGAT5B	0.57728	0.0016655	1	1	1
ENSG00000111596	CNOT2	0.577294	0.0023685	1	1	1
ENSG00000101190	TCFL5	0.577393	0.00216083	1	1	1
ENSG00000118495	PLAGL1	0.57742	0.00121051	1	1	1
ENSG00000160401	CFAP157	0.577548	0.00133177	1	1	1
ENSG00000023171	GRAMD1B	0.577587	0.0012662	1	1	1
ENSG00000259153	AC004816.1	0.577603	0.00161414	1	1	1
ENSG00000131018	SYNE1	0.577675	0.000747615	1	1	1
ENSG00000131969	ABHD12B	0.577788	0.00399709	1	1	1
ENSG00000249348	UGDH-AS1	0.577976	0.00149065	1	1	1
ENSG00000141404	GNAL	0.578001	0.00380542	1	1	1
ENSG00000065154	OAT	0.578034	0.0033001	1	1	1
ENSG00000203727	SAMD5	0.578036	0.00147481	1	1	1
ENSG00000253230	LINC00599	0.578056	0.000910371	1	1	1
ENSG00000260465	AC018557.1	0.578106	0.00235992	1	1	1
ENSG00000276547	PCDHGB5	0.578109	0.00332224	1	1	1
ENSG00000009709	PAX7	0.578118	0.00231233	1	0	1
ENSG00000129250	KIF1C	0.578181	0.00217071	1	1	1
ENSG00000261147	AC091167.2	0.578201	0.00633592	1	1	1
ENSG00000170653	ATF7	0.578274	0.00240311	1	1	1
ENSG00000112339	HBS1L	0.578343	0.00266136	1	1	1
ENSG00000105583	WDR83OS	0.578354	0.00112499	1	1	1
ENSG00000258674	AC011448.1	0.578381	0.00197617	1	1	1
ENSG00000174446	SNAPC5	0.578404	0.000965574	1	1	1
ENSG00000183722	LHFPL6	0.57848	0.000958463	1	1	1
ENSG00000119865	CNRIP1	0.578585	0.0046209	1	1	1
ENSG00000181350	LRRC75A	0.578587	0.000954351	1	1	1
ENSG00000237440	ZNF737	0.57862	0.00173454	1	1	1
ENSG00000260931	ENSG00000260931	0.578625	0.00243539	1	1	1
ENSG00000101134	DOK5	0.578645	0.00231867	1	1	1
ENSG00000225507	AC069282.1	0.578654	0.00147514	1	1	1
ENSG00000113845	TIMMDC1	0.578673	0.00301562	1	1	1
ENSG00000233175	AC008105.1	0.578684	0.00123644	1	1	1
ENSG00000101846	STS	0.578688	0.0023685	1	1	1
ENSG00000134825	TMEM258	0.578699	0.00615279	1	1	1
ENSG00000237515	SHISA9	0.578703	0.00633592	1	1	1
ENSG00000020922	MRE11	0.578712	0.00153982	1	1	1
ENSG00000231340	ACTG1P10	0.578733	0.00137024	1	1	1
ENSG00000079931	MOXD1	0.578811	0.00203446	1	1	1
ENSG00000113763	UNC5A	0.578828	0.00160262	1	1	1
ENSG00000130695	CEP85	0.578867	0.00240237	1	1	1
ENSG00000278948	AL031587.5	0.57892	0.00349358	1	1	1
ENSG00000145431	PDGFC	0.578968	0.000879777	1	1	1
ENSG00000105323	HNRNPUL1	0.578985	0.00344779	1	1	1
ENSG00000081377	CDC14B	0.579021	0.00152372	1	1	1
ENSG00000268120	AC010336.3	0.579065	0.00216869	1	1	1
ENSG00000128185	DGCR6L	0.579101	0.00176511	1	1	1
ENSG00000164082	GRM2	0.579103	0.00248535	1	1	1
ENSG00000186160	CYP4Z1	0.579111	0.00234322	1	0	1
ENSG00000196724	ZNF418	0.579138	0.00198249	1	1	1
ENSG00000143786	CNIH3	0.57914	0.003479	1	1	1
ENSG00000204599	TRIM39	0.579165	0.00353399	1	1	1
ENSG00000140807	NKD1	0.579167	0.000801962	1	1	1
ENSG00000280173	AC104447.1	0.579236	0.00217497	1	1	1
ENSG00000076826	CAMSAP3	0.579244	0.00192227	1	1	1
ENSG00000164442	CITED2	0.579362	0.00158487	1	1	1
ENSG00000186212	SOWAHB	0.579396	0.00159542	1	1	1
ENSG00000242950	ERVW-1	0.57941	0.00147184	1	1	1
ENSG00000116584	ARHGEF2	0.579442	0.00235828	1	1	1
ENSG00000180828	BHLHE22	0.579479	0.00207784	1	1	1
ENSG00000183454	GRIN2A	0.579538	0.00263715	1	1	1
ENSG00000274810	NPHP3-ACAD11	0.579539	0.000979842	1	1	1
ENSG00000273108	AL121929.2	0.57967	0.00134618	1	1	1
ENSG00000272072	AC004492.1	0.579706	0.00144284	1	1	1
ENSG00000231731	AC010976.1	0.579707	0.0010504	1	1	1
ENSG00000112218	GPR63	0.57971	0.00267607	1	1	1
ENSG00000107281	NPDC1	0.579805	0.00246458	1	1	1
ENSG00000140526	ABHD2	0.579806	0.00257471	1	1	1
ENSG00000150051	MKX	0.579807	0.00271623	1	1	1
ENSG00000276644	DACH1	0.579836	0.00280924	1	1	1
ENSG00000112137	PHACTR1	0.579887	0.00174681	1	1	1
ENSG00000147133	TAF1	0.579898	0.0050183	1	1	1
ENSG00000122691	TWIST1	0.579971	0.00274403	1	0	1
ENSG00000152082	MZT2B	0.580001	0.00115756	1	1	1
ENSG00000221983	UBA52	0.580022	0.00297962	1	1	1
ENSG00000100554	ATP6V1D	0.580051	0.000917504	1	1	1
ENSG00000182247	UBE2E2	0.580078	0.00390394	1	1	1
ENSG00000164919	COX6C	0.58011	0.00153511	1	1	1
ENSG00000170776	AKAP13	0.580125	0.00152691	1	1	1
ENSG00000177875	CCDC184	0.580183	0.00282318	1	1	1
ENSG00000152583	SPARCL1	0.58024	0.00233821	1	0	1
ENSG00000117155	SSX2IP	0.580297	0.00314666	1	1	1
ENSG00000226318	RPS3AP38	0.580333	0.00175079	1	0	0
ENSG00000125901	MRPS26	0.580357	0.00129233	1	1	1
ENSG00000155657	TTN	0.580359	0.00108059	1	1	1
ENSG00000158526	TSR2	0.580368	0.00229822	1	1	1
ENSG00000111452	ADGRD1	0.580378	0.00294605	1	1	1
ENSG00000174136	RGMB	0.580383	0.00348909	1	1	1
ENSG00000162631	NTNG1	0.58051	0.0017691	1	1	1
ENSG00000138617	PARP16	0.580517	0.00191087	1	1	1
ENSG00000186047	DLEU7	0.580534	0.00297438	1	1	1
ENSG00000099849	RASSF7	0.580618	0.000859731	1	1	1
ENSG00000233885	YEATS2-AS1	0.580673	0.0016959	1	1	1
ENSG00000181744	C3orf58	0.580692	0.00162938	1	1	1
ENSG00000138434	SSFA2	0.580698	0.002171	1	1	1
ENSG00000157911	PEX10	0.580841	0.00140352	1	1	1
ENSG00000213397	HAUS7	0.580855	0.00270414	1	1	1
ENSG00000107742	SPOCK2	0.580865	0.00317893	1	1	1
ENSG00000241360	PDXP	0.580901	0.00204965	1	1	1
ENSG00000171858	RPS21	0.580916	0.00139435	1	1	1
ENSG00000149541	B3GAT3	0.580997	0.00288812	1	1	1
ENSG00000258724	AC105001.2	0.581102	0.000887501	1	1	1
ENSG00000128524	ATP6V1F	0.58117	0.000952348	1	1	1
ENSG00000280165	PCDH20	0.581195	0.00503365	1	1	1
ENSG00000154975	CA10	0.581277	0.00163443	1	1	1
ENSG00000246451	AL049840.1	0.581293	0.00168908	1	1	1
ENSG00000143862	ARL8A	0.581399	0.00394345	1	1	1
ENSG00000002746	HECW1	0.58141	0.00314373	1	1	1
ENSG00000121851	POLR3GL	0.581469	0.00225993	1	1	1
ENSG00000276148	AC084824.5	0.581502	0.00242633	1	1	1
ENSG00000112038	OPRM1	0.581503	0.00114008	1	0	1
ENSG00000166501	PRKCB	0.58163	0.00392876	1	0	1
ENSG00000258824	AL122035.1	0.581734	0.000869486	1	1	1
ENSG00000155111	CDK19	0.581803	0.00392598	1	1	1
ENSG00000102572	STK24	0.581807	0.00320407	1	1	1
ENSG00000159164	SV2A	0.581875	0.00338809	1	1	1
ENSG00000104413	ESRP1	0.581895	0.00287551	1	0	1
ENSG00000186566	GPATCH8	0.581897	0.00154379	1	1	1
ENSG00000079156	OSBPL6	0.581968	0.00261053	1	1	1
ENSG00000125826	RBCK1	0.582008	0.00303245	1	1	1
ENSG00000004660	CAMKK1	0.582041	0.00280136	1	1	1
ENSG00000138759	FRAS1	0.58207	0.00298418	1	0	1
ENSG00000163161	ERCC3	0.582096	0.00104903	1	1	1
ENSG00000115828	QPCT	0.582117	0.00737584	1	1	1
ENSG00000131116	ZNF428	0.582307	0.00303245	1	1	1
ENSG00000136003	ISCU	0.582341	0.00201714	1	1	1
ENSG00000170445	HARS	0.582367	0.00105092	1	1	1
ENSG00000100603	SNW1	0.582487	0.0014628	1	1	1
ENSG00000070476	ZXDC	0.58252	0.00272549	1	1	1
ENSG00000273025	AC009690.3	0.582534	0.00219917	1	1	1
ENSG00000072315	TRPC5	0.58256	0.00218776	1	1	1
ENSG00000196562	SULF2	0.582562	0.00147481	1	1	1
ENSG00000214367	HAUS3	0.582686	0.00136635	1	1	1
ENSG00000197555	SIPA1L1	0.582717	0.00321128	1	1	1
ENSG00000134207	SYT6	0.582795	0.00119647	1	1	1
ENSG00000182256	GABRG3	0.582831	0.00299182	1	1	1
ENSG00000162069	BICDL2	0.58285	0.00350083	1	1	1
ENSG00000153814	JAZF1	0.582874	0.00698434	1	1	1
ENSG00000163075	CFAP221	0.582905	0.00240473	1	1	1
ENSG00000160688	FLAD1	0.582943	0.00152217	1	1	1
ENSG00000097096	SYDE2	0.582953	0.00342501	1	1	1
ENSG00000188559	RALGAPA2	0.582981	0.00165451	1	1	1
ENSG00000120217	CD274	0.583155	0.00134996	1	1	1
ENSG00000152595	MEPE	0.583227	0.00349358	1	1	1
ENSG00000128045	RASL11B	0.583246	0.00306604	1	0	1
ENSG00000076924	XAB2	0.583351	0.00239313	1	1	1
ENSG00000179195	ZNF664	0.583379	0.00289993	1	1	1
ENSG00000206579	XKR4	0.58339	0.00685721	1	0	1
ENSG00000159086	PAXBP1	0.583421	0.00470847	1	1	1
ENSG00000183091	NEB	0.583455	0.000929213	1	1	1
ENSG00000161981	SNRNP25	0.583462	0.00141575	1	1	1
ENSG00000186468	RPS23	0.583487	0.00258479	1	1	1
ENSG00000188848	BEND4	0.58352	0.00300908	1	0	1
ENSG00000114544	SLC41A3	0.583559	0.00136635	1	1	1
ENSG00000213619	NDUFS3	0.583564	0.00115542	1	1	1
ENSG00000235436	DPY19L2P4	0.58357	0.00242342	1	1	1
ENSG00000123119	NECAB1	0.583609	0.0029709	1	1	1
ENSG00000155287	SLC25A28	0.583756	0.00311213	1	1	1
ENSG00000140798	ABCC12	0.583863	0.00282316	1	0	1
ENSG00000156482	RPL30	0.583934	0.00378387	1	1	1
ENSG00000079102	RUNX1T1	0.583943	0.00139435	1	1	1
ENSG00000142634	EFHD2	0.583986	0.00402255	1	1	1
ENSG00000144724	PTPRG	0.584002	0.00305276	1	1	1
ENSG00000248859	LINC01574	0.584102	0.00204868	1	1	1
ENSG00000115207	GTF3C2	0.584204	0.00259809	1	1	1
ENSG00000076351	SLC46A1	0.584209	0.00130195	1	1	1
ENSG00000143952	VPS54	0.584238	0.00307595	1	1	1
ENSG00000100568	VTI1B	0.584374	0.00295898	1	1	1
ENSG00000153815	CMIP	0.584423	0.00303334	1	1	1
ENSG00000198938	MT-CO3	0.58444	0.00199876	1	0	1
ENSG00000109475	RPL34	0.584463	0.00229822	1	1	1
ENSG00000120322	PCDHB8	0.584497	0.00210496	1	1	1
ENSG00000165028	NIPSNAP3B	0.584594	0.00249648	1	1	1
ENSG00000210082	MT-RNR2	0.584615	0.00475698	1	0	1
ENSG00000151414	NEK7	0.584623	0.00263332	1	1	1
ENSG00000176225	RTTN	0.584644	0.00247702	1	1	1
ENSG00000235954	TTC28-AS1	0.584681	0.00143891	1	1	1
ENSG00000053524	MCF2L2	0.584761	0.00920264	1	1	1
ENSG00000187239	FNBP1	0.584849	0.00280136	1	1	1
ENSG00000108107	RPL28	0.584934	0.00445063	1	1	1
ENSG00000256542	AC148477.2	0.58497	0.00129784	1	1	1
ENSG00000261732	AL031708.1	0.584988	0.0023685	1	1	1
ENSG00000170248	PDCD6IP	0.585021	0.00101607	1	1	1
ENSG00000174917	C19orf70	0.585035	0.00190989	1	1	1
ENSG00000120253	NUP43	0.585046	0.00367157	1	1	1
ENSG00000174437	ATP2A2	0.585093	0.00477508	1	1	1
ENSG00000173660	UQCRH	0.585094	0.00177726	1	1	1
ENSG00000139985	ADAM21	0.585162	0.00303245	1	0	0
ENSG00000138468	SENP7	0.585203	0.00117047	1	1	1
ENSG00000119720	NRDE2	0.585234	0.00297962	1	1	1
ENSG00000171456	ASXL1	0.585238	0.00380083	1	1	1
ENSG00000001167	NFYA	0.5853	0.002171	1	1	1
ENSG00000148450	MSRB2	0.585351	0.00380768	1	1	1
ENSG00000101003	GINS1	0.585539	0.00234498	1	1	1
ENSG00000243888	AL355140.1	0.585557	0.00361531	1	1	1
ENSG00000187240	DYNC2H1	0.585564	0.00154313	1	1	1
ENSG00000178234	GALNT11	0.585631	0.00430221	1	1	1
ENSG00000127540	UQCR11	0.585658	0.00183769	1	1	1
ENSG00000128594	LRRC4	0.585676	0.00302978	1	1	1
ENSG00000113361	CDH6	0.585702	0.00353399	1	1	1
ENSG00000169621	APLF	0.585714	0.00204178	1	0	0
ENSG00000273420	AC008738.7	0.585755	0.00157715	1	1	1
ENSG00000203993	ARRDC1-AS1	0.585951	0.00303262	1	1	1
ENSG00000115290	GRB14	0.585973	0.0030001	1	1	1
ENSG00000003393	ALS2	0.586008	0.00192413	1	1	1
ENSG00000204220	PFDN6	0.586034	0.00347945	1	1	1
ENSG00000161021	MAML1	0.586035	0.00590812	1	1	1
ENSG00000130779	CLIP1	0.586074	0.00175541	1	1	1
ENSG00000249158	PCDHA11	0.586077	0.00427109	1	1	1
ENSG00000184209	SNRNP35	0.586094	0.00430221	1	1	1
ENSG00000136908	DPM2	0.586139	0.00664293	1	1	1
ENSG00000165716	FAM69B	0.586152	0.00258479	1	1	1
ENSG00000109790	KLHL5	0.586159	0.00305276	1	1	1
ENSG00000162664	ZNF326	0.586173	0.00276144	1	1	1
ENSG00000265787	CYP4F35P	0.586177	0.00218776	1	1	1
ENSG00000167912	AC090152.1	0.586199	0.00267607	1	1	1
ENSG00000243725	TTC4	0.58626	0.00248535	1	1	1
ENSG00000127914	AKAP9	0.586335	0.0010079	1	1	1
ENSG00000166508	MCM7	0.586365	0.00297438	1	1	1
ENSG00000165678	GHITM	0.586444	0.00620297	1	1	1
ENSG00000110076	NRXN2	0.586457	0.00160198	1	1	1
ENSG00000116747	TROVE2	0.586462	0.00163392	1	1	1
ENSG00000120645	IQSEC3	0.586482	0.0029399	1	1	1
ENSG00000073150	PANX2	0.586565	0.0019244	1	1	1
ENSG00000154945	ANKRD40	0.586612	0.0026399	1	1	1
ENSG00000189420	ZFP92	0.586695	0.00402373	1	0	0
ENSG00000135127	BICDL1	0.586789	0.00261879	1	1	1
ENSG00000142534	RPS11	0.58685	0.00301562	1	1	1
ENSG00000205268	PDE7A	0.586876	0.00610589	1	1	1
ENSG00000198315	ZKSCAN8	0.586999	0.00166132	1	1	1
ENSG00000171695	LKAAEAR1	0.587015	0.00168908	1	1	1
ENSG00000125869	LAMP5	0.587041	0.00391928	1	1	1
ENSG00000248367	AC008610.1	0.58707	0.00163443	1	1	1
ENSG00000011143	MKS1	0.58714	0.00303262	1	1	1
ENSG00000166860	ZBTB39	0.587144	0.00105092	1	1	1
ENSG00000182628	SKA2	0.587152	0.00427109	1	1	1
ENSG00000173113	TRMT112	0.587155	0.00298287	1	1	1
[truncated: 5,755 more rows]

## Sheet: Unique clrDV DV genes BH
	gene_symbol	SD_ratio	adj_pval
ENSG00000231249	ITPR1-AS1	0.605639	0.00493031
ENSG00000114251	WNT5A	0.607603	0.00700202
ENSG00000236963	LINC01141	0.614888	0.00824517
ENSG00000239626	RPSAP41	0.618697	0.0117154
ENSG00000142327	RNPEPL1	0.619269	0.00870549
ENSG00000157916	RER1	0.625689	0.0151304
ENSG00000170961	HAS2	0.628771	0.0117566
ENSG00000267228	AC012254.2	0.637215	0.0200602
ENSG00000185475	TMEM179B	0.643023	0.0395794
ENSG00000089063	TMEM230	0.651042	0.0368918
ENSG00000099250	NRP1	0.658164	0.0299082
ENSG00000161888	SPC24	0.658456	0.0336243
ENSG00000100147	CCDC134	0.659176	0.0262019
ENSG00000189238	LINC00943	0.660488	0.0336249
ENSG00000133706	LARS	0.662349	0.0262279
ENSG00000231822	AC019097.1	0.662812	0.0433828
ENSG00000183032	SLC25A21	0.663442	0.0395811
ENSG00000272690	LINC02018	0.66419	0.0317513
ENSG00000256861	AC048338.1	0.664421	0.0425611
ENSG00000271105	SCML2P2	0.666183	0.0459669
ENSG00000278934	AC117489.1	0.669577	0.0400564
ENSG00000196083	IL1RAP	0.670365	0.0481882
ENSG00000125845	BMP2	0.671044	0.0362445
ENSG00000248672	LY75-CD302	0.671645	0.0478733
ENSG00000167103	PIP5KL1	0.673514	0.0405719
ENSG00000254692	AL136295.1	0.674879	0.0464903
ENSG00000088930	XRN2	0.675096	0.042492
ENSG00000120903	CHRNA2	0.677806	0.0487276

## Sheet: Unique clrDV DV genes BY
	gene_symbol	SD_ratio	adj_pval
ENSG00000101327	PDYN	0.552956	0.00125465
ENSG00000133110	POSTN	0.562733	0.00102134
ENSG00000051341	POLQ	0.563547	0.00102862
ENSG00000226318	RPS3AP38	0.580333	0.00175079
ENSG00000139985	ADAM21	0.585162	0.00303245
ENSG00000169621	APLF	0.585714	0.00204178
ENSG00000189420	ZFP92	0.586695	0.00402373
ENSG00000112333	NR2E1	0.587529	0.0022539
ENSG00000253553	AC090568.2	0.589156	0.00338998
ENSG00000153266	FEZF2	0.593551	0.00326585
ENSG00000155011	DKK2	0.599806	0.00686159
ENSG00000129009	ISLR	0.600765	0.00329986
ENSG00000138435	CHRNA1	0.600822	0.00545177
ENSG00000150316	CWC15	0.6011	0.00941516
ENSG00000179057	IGSF22	0.603028	0.00502367
ENSG00000231249	ITPR1-AS1	0.605639	0.00493031
ENSG00000230725	AL035252.2	0.606227	0.00574013
ENSG00000275286	AC025253.1	0.606466	0.00673369
ENSG00000114251	WNT5A	0.607603	0.00700202
ENSG00000256576	LINC02361	0.611158	0.014782
ENSG00000050767	COL23A1	0.611476	0.00708926
ENSG00000153395	LPCAT1	0.611587	0.00518785
ENSG00000253854	AC010834.3	0.612067	0.00731063
ENSG00000232520	AC012507.2	0.613344	0.00730252
ENSG00000236963	LINC01141	0.614888	0.00824517
ENSG00000105851	PIK3CG	0.616839	0.0106342
ENSG00000280282	AC138430.2	0.617632	0.00897331
ENSG00000239626	RPSAP41	0.618697	0.0117154
ENSG00000261069	AC124312.3	0.618879	0.0107862
ENSG00000128564	VGF	0.619103	0.0096953
ENSG00000167996	FTH1	0.619239	0.00712236
ENSG00000142327	RNPEPL1	0.619269	0.00870549
ENSG00000269243	AC008894.2	0.62138	0.0203748
ENSG00000152056	AP1S3	0.621631	0.00855708
ENSG00000233009	NALCN-AS1	0.622352	0.00849719
ENSG00000231533	AL078601.2	0.622929	0.0123359
ENSG00000222041	CYTOR	0.623182	0.00712019
ENSG00000112706	IMPG1	0.62368	0.0112128
ENSG00000205277	MUC12	0.623794	0.00867114
ENSG00000168958	MFF	0.624501	0.0109849
ENSG00000122585	NPY	0.625064	0.0158505
ENSG00000140563	MCTP2	0.625524	0.0123486
ENSG00000157916	RER1	0.625689	0.0151304
ENSG00000120519	SLC10A7	0.625836	0.0074066
ENSG00000170961	HAS2	0.628771	0.0117566
ENSG00000239653	PSMD6-AS2	0.62879	0.012174
ENSG00000181649	PHLDA2	0.629594	0.0139057
ENSG00000006377	DLX6	0.629805	0.0136658
ENSG00000169442	CD52	0.63026	0.0129004
ENSG00000151790	TDO2	0.630423	0.0157201
ENSG00000181104	F2R	0.630661	0.0105839
ENSG00000158748	HTR6	0.632366	0.016062
ENSG00000143320	CRABP2	0.633922	0.0106268
ENSG00000159374	M1AP	0.634431	0.0168535
ENSG00000272514	CFAP206	0.634951	0.0187979
ENSG00000246477	AF131216.1	0.63526	0.016062
ENSG00000145681	HAPLN1	0.635804	0.0217967
ENSG00000254198	AC113191.1	0.636034	0.0175705
ENSG00000173163	COMMD1	0.636052	0.014995
ENSG00000064218	DMRT3	0.636111	0.0187409
ENSG00000187987	ZSCAN23	0.636213	0.0186384
ENSG00000165072	MAMDC2	0.63677	0.017757
ENSG00000274718	AL136964.1	0.636796	0.0168535
ENSG00000227091	AL355990.1	0.637207	0.0205755
ENSG00000267228	AC012254.2	0.637215	0.0200602
ENSG00000107833	NPM3	0.637289	0.0133168
ENSG00000272902	TBC1D8-AS1	0.637342	0.0202856
ENSG00000254959	INMT-MINDY4	0.637482	0.0192979
ENSG00000228492	RAB11FIP1P1	0.638991	0.0171598
ENSG00000154640	BTG3	0.639034	0.014025
ENSG00000268220	AC008040.5	0.639152	0.0121478
ENSG00000272097	AL024498.1	0.639668	0.024981
ENSG00000171873	ADRA1D	0.639784	0.0296242
ENSG00000110108	TMEM109	0.639963	0.0119669
ENSG00000187664	HAPLN4	0.640176	0.0207554
ENSG00000257272	AL162311.1	0.640368	0.0400887
ENSG00000128965	CHAC1	0.640793	0.0257702
ENSG00000248738	AC037441.1	0.641373	0.0239608
ENSG00000081842	PCDHA6	0.641459	0.0261507
ENSG00000251372	LINC00499	0.641827	0.0222588
ENSG00000112619	PRPH2	0.64255	0.0366811
ENSG00000185475	TMEM179B	0.643023	0.0395794
ENSG00000081277	PKP1	0.643747	0.0245623
ENSG00000188095	MESP2	0.643963	0.0157801
ENSG00000132429	POPDC3	0.644353	0.0175476
ENSG00000135845	PIGC	0.644404	0.0249649
ENSG00000274376	ADAMTS7P1	0.644732	0.0202962
ENSG00000074319	TSG101	0.644973	0.0146213
ENSG00000011052	NME1-NME2	0.644977	0.0151167
ENSG00000167011	NAT16	0.645653	0.0294999
ENSG00000254187	AC008708.2	0.645802	0.0194552
ENSG00000126259	KIRREL2	0.646564	0.026044
ENSG00000113389	NPR3	0.646916	0.0331271
ENSG00000104299	INTS9	0.647125	0.0187252
ENSG00000173826	KCNH6	0.647801	0.0293953
ENSG00000136492	BRIP1	0.649187	0.0301064
ENSG00000067113	PLPP1	0.649305	0.0148976
ENSG00000175707	KDF1	0.649324	0.0291676
ENSG00000188729	OSTN	0.649329	0.0422986
ENSG00000182722	SEPHS1P1	0.649826	0.0330387
ENSG00000197385	ZNF860	0.650786	0.0193666
ENSG00000089063	TMEM230	0.651042	0.0368918
ENSG00000145375	SPATA5	0.65153	0.0188715
ENSG00000163632	C3orf49	0.651669	0.0485888
ENSG00000118960	HS1BP3	0.652275	0.0267717
ENSG00000164651	SP8	0.655107	0.0347275
ENSG00000279700	AC131212.2	0.655148	0.0280511
ENSG00000258924	AC002094.1	0.655163	0.0486047
ENSG00000105976	MET	0.655488	0.03131
ENSG00000078061	ARAF	0.655663	0.043178
ENSG00000149305	HTR3B	0.655815	0.0391646
ENSG00000268750	AC010522.1	0.655861	0.0323166
ENSG00000258240	AC002351.1	0.656069	0.0382471
ENSG00000169692	AGPAT2	0.656211	0.0202018
ENSG00000175643	RMI2	0.656482	0.0336536
ENSG00000279624	ENSG00000279624	0.656836	0.0430816
ENSG00000135211	TMEM60	0.657125	0.030975
ENSG00000278913	AC026797.1	0.657395	0.0378075
ENSG00000279809	AC005538.2	0.657562	0.0409465
ENSG00000099250	NRP1	0.658164	0.0299082
ENSG00000161888	SPC24	0.658456	0.0336243
ENSG00000104904	OAZ1	0.659025	0.0284702
ENSG00000100147	CCDC134	0.659176	0.0262019
ENSG00000278518	AL161645.1	0.659942	0.0372932
ENSG00000251485	AC068134.3	0.660246	0.0380912
ENSG00000189238	LINC00943	0.660488	0.0336249
ENSG00000166147	FBN1	0.660809	0.0257422
ENSG00000163291	PAQR3	0.660817	0.0330078
ENSG00000135974	C2orf49	0.660957	0.0209843
ENSG00000114302	PRKAR2A	0.660986	0.0215806
ENSG00000138670	RASGEF1B	0.661141	0.0266437
ENSG00000116771	AGMAT	0.661206	0.0440707
ENSG00000187210	GCNT1	0.661362	0.0419221
ENSG00000131503	ANKHD1	0.661464	0.0253405
ENSG00000166558	SLC38A8	0.661557	0.0407459
ENSG00000075073	TACR2	0.661667	0.0443332
ENSG00000134602	STK26	0.661748	0.0243893
ENSG00000100575	TIMM9	0.661961	0.0393147
ENSG00000133706	LARS	0.662349	0.0262279
ENSG00000257315	ZBED6	0.662429	0.0436853
ENSG00000135824	RGS8	0.662628	0.0299226
ENSG00000231822	AC019097.1	0.662812	0.0433828
ENSG00000139436	GIT2	0.662858	0.0330387
ENSG00000115020	PIKFYVE	0.662917	0.0264743
ENSG00000279453	Z99129.4	0.66323	0.0464249
ENSG00000146670	CDCA5	0.663431	0.0422172
ENSG00000183032	SLC25A21	0.663442	0.0395811
ENSG00000231672	DIRC3	0.663633	0.0355173
ENSG00000113494	PRLR	0.663778	0.0497481
ENSG00000272690	LINC02018	0.66419	0.0317513
ENSG00000256861	AC048338.1	0.664421	0.0425611
ENSG00000114670	NEK11	0.664668	0.0414312
ENSG00000205730	ITPRIPL2	0.665278	0.0288473
ENSG00000205189	ZBTB10	0.665458	0.0300277
ENSG00000213976	AC010615.1	0.665577	0.0307051
ENSG00000011007	ELOA	0.665676	0.0497481
ENSG00000136156	ITM2B	0.665819	0.0308427
ENSG00000271105	SCML2P2	0.666183	0.0459669
ENSG00000143479	DYRK3	0.666405	0.0264045
ENSG00000134255	CEPT1	0.667377	0.0338524
ENSG00000214652	ZNF727	0.668334	0.0481971
ENSG00000184922	FMNL1	0.66838	0.0440576
ENSG00000244513	AC109587.1	0.668646	0.0425739
ENSG00000180917	CMTR2	0.66885	0.0353147
ENSG00000261026	AC105046.1	0.668894	0.0489477
ENSG00000268614	AC008878.2	0.669351	0.0464592
ENSG00000278934	AC117489.1	0.669577	0.0400564
ENSG00000087008	ACOX3	0.669701	0.0313848
ENSG00000089902	RCOR1	0.669882	0.0311819
ENSG00000185437	SH3BGR	0.670036	0.0437857
ENSG00000196083	IL1RAP	0.670365	0.0481882
ENSG00000125845	BMP2	0.671044	0.0362445
ENSG00000187815	ZFP69	0.671439	0.0365343
ENSG00000162521	RBBP4	0.671497	0.0375316
ENSG00000248672	LY75-CD302	0.671645	0.0478733
ENSG00000142864	SERBP1	0.671684	0.0448198
ENSG00000181826	RELL1	0.671872	0.0387761
ENSG00000164088	PPM1M	0.672	0.049653
ENSG00000257342	AC025165.2	0.672801	0.0347944
ENSG00000115364	MRPL19	0.673265	0.0443488
ENSG00000167103	PIP5KL1	0.673514	0.0405719
ENSG00000137054	POLR1E	0.674192	0.0472686
ENSG00000144224	UBXN4	0.674452	0.0394251
ENSG00000163069	SGCB	0.674474	0.0338212
ENSG00000254692	AL136295.1	0.674879	0.0464903
ENSG00000088930	XRN2	0.675096	0.042492
ENSG00000254154	CRYZL2P-SEC16B	0.67553	0.0482922
ENSG00000169359	SLC33A1	0.675925	0.0453345
ENSG00000254876	AL590705.5	0.675985	0.0467261
ENSG00000143319	ISG20L2	0.676065	0.0365255
ENSG00000139508	SLC46A3	0.676193	0.0447971
ENSG00000120903	CHRNA2	0.677806	0.0487276
ENSG00000138678	GPAT3	0.677894	0.0363779
ENSG00000134463	ECHDC3	0.677945	0.0454679
ENSG00000178338	ZNF354B	0.678647	0.0394975
ENSG00000173889	PHC3	0.680964	0.0414371
ENSG00000058063	ATP11B	0.681369	0.0394649
ENSG00000181722	ZBTB20	0.681397	0.0430596
ENSG00000134970	TMED7	0.681935	0.0449879
ENSG00000136485	DCAF7	0.682707	0.0491189
ENSG00000250312	ZNF718	0.683001	0.0477166
